# Supplementary material for: Mitochondrial protein import stress augments α-synuclein aggregation and neural damage independent of bioenergetics
Source: Research Square preprint supplement (doi:10.21203/rs.3.rs-3136613/v1), 2025-08-18
Supplement: Supplementary file 2 [file 5b351b6fe43daad1127c78b3.xlsx]

## Sheet: All proteins
Description	Gene Symbol	Abundance Ratio: (D) / (A)	Abundance Ratio Adj. P-Value: (D) / (A)
Myelin protein P0 OS=Mus musculus GN=Mpz PE=1 SV=1	Mpz	16.516	1.34679e-15
Collagen alpha-1(III) chain OS=Bos taurus GN=COL3A1 PE=1 SV=1	COL3A1	6.234	1.34679e-15
Collagen alpha-1(I) chain OS=Mus musculus GN=Col1a1 PE=1 SV=4	Col1a1	5.092	1.34679e-15
Periaxin OS=Mus musculus GN=Prx PE=1 SV=1	Prx	4.241	1.34679e-15
Myelin P2 protein OS=Mus musculus GN=Pmp2 PE=2 SV=2	Pmp2	3.484	1.34679e-15
Lumican OS=Mus musculus GN=Lum PE=1 SV=2	Lum	3.134	1.34679e-15
Collagen alpha-2(I) chain OS=Mus musculus GN=Col1a2 PE=1 SV=2	Col1a2	3.113	1.34679e-15
Collagen alpha-1(XI) chain OS=Mus musculus GN=Col11a1 PE=1 SV=2	Col11a1	2.683	1.34679e-15
ATP synthase mitochondrial F1 complex assembly factor 2 OS=Mus musculus GN=Atpaf2 PE=1 SV=1	Atpaf2	2.51	1.34679e-15
Claudin-19 OS=Mus musculus GN=Cldn19 PE=1 SV=3	Cldn19	2.435	1.34679e-15
Somatomedin-B and thrombospondin type-1 domain-containing protein OS=Mus musculus GN=Sbspon PE=2 SV=1	Sbspon	2.226	1.34679e-15
Laminin subunit beta-1 OS=Mus musculus GN=Lamb1 PE=1 SV=1	Lamb1	2.098	1.34679e-15
Mimecan OS=Mus musculus GN=Ogn PE=1 SV=1	Ogn	1.931	1.34679e-15
Alpha globin 1 OS=Mus musculus GN=haemaglobin alpha 1 PE=1 SV=1	Hba-a1	1.883	1.34679e-15
Apolipoprotein A-I OS=Mus musculus GN=Apoa1 PE=1 SV=2	Apoa1	1.842	1.34679e-15
Laminin subunit alpha-2 OS=Mus musculus GN=Lama2 PE=1 SV=2	Lama2	1.835	1.34679e-15
Haptoglobin OS=Mus musculus GN=Hp PE=1 SV=1	Hp	1.824	1.34679e-15
Neutrophilic granule protein OS=Mus musculus GN=Ngp PE=1 SV=1	Ngp	1.818	1.34679e-15
Collagen alpha-2(VI) chain OS=Mus musculus GN=Col6a2 PE=1 SV=3	Col6a2	1.809	1.34679e-15
Collagen alpha-1(VI) chain OS=Mus musculus GN=Col6a1 PE=1 SV=1	Col6a1	1.799	1.34679e-15
CD9 antigen OS=Mus musculus GN=Cd9 PE=1 SV=2	Cd9	1.793	1.34679e-15
Transforming growth factor-beta-induced protein ig-h3 OS=Mus musculus GN=Tgfbi PE=1 SV=1	Tgfbi	1.786	1.34679e-15
Biglycan OS=Mus musculus GN=Bgn PE=1 SV=1	Bgn	1.757	1.34679e-15
Beta-globin OS=Mus musculus GN=Hbbt1 PE=1 SV=1	Hbb-bs	1.697	1.34679e-15
Fibrillin-1 OS=Mus musculus GN=Fbn1 PE=1 SV=2	Fbn1	1.684	1.34679e-15
O-phosphoseryl-tRNA(Sec) selenium transferase OS=Mus musculus GN=Sepsecs PE=4 SV=1	Sepsecs	1.668	1.34679e-15
DNA-directed RNA polymerase subunit OS=Mus musculus GN=Polr3a PE=1 SV=1	Polr3a	1.662	1.34679e-15
Leucine-rich repeat and guanylate kinase domain-containing protein OS=Mus musculus GN=Lrguk PE=1 SV=1	Lrguk	1.608	1.34679e-15
CD151 antigen OS=Mus musculus GN=Cd151 PE=1 SV=2	Cd151	1.602	1.34679e-15
Transcription factor YY2 OS=Mus musculus GN=Yy2 PE=2 SV=1	Yy2	0.696	1.34679e-15
Troponin C, skeletal muscle OS=Mus musculus GN=Tnnc2 PE=1 SV=2	Tnnc2	0.692	1.34679e-15
Myosin light chain 1/3, skeletal muscle isoform OS=Mus musculus GN=Myl1 PE=1 SV=2	Myl1	0.661	1.34679e-15
Ephrin type-B receptor 3 OS=Mus musculus GN=Ephb3 PE=1 SV=2	Ephb3	0.652	1.34679e-15
Calsequestrin-1 OS=Mus musculus GN=Casq1 PE=1 SV=3	Casq1	0.649	1.34679e-15
Poly(rC)-binding protein 1 OS=Mus musculus GN=Pcbp1 PE=1 SV=1	Pcbp1	0.647	1.34679e-15
Myosin regulatory light chain 2, skeletal muscle isoform OS=Mus musculus GN=Mylpf PE=1 SV=3	Myl11	0.643	1.34679e-15
Keratin, type II cytoskeletal 6A OS=Homo sapiens GN=KRT6A PE=1 SV=3	KRT6A	0.601	1.34679e-15
Myosin-4 OS=Mus musculus GN=Myh4 PE=2 SV=1	Myh4	0.598	1.34679e-15
Keratin, type I cuticular Ha8 OS=Homo sapiens GN=KRT38 PE=2 SV=3	KRT38	0.481	1.34679e-15
Glycine tyrosine-rich hair keratin protein OS=Mus musculus GN=Krtap6-1 PE=2 SV=1	1110025L11Rik	0.469	1.34679e-15
TGF-beta receptor type-2 OS=Mus musculus GN=Tgfbr2 PE=1 SV=1	Tgfbr2	0.423	1.34679e-15
Long-chain fatty acid transport protein 4 OS=Mus musculus GN=Slc27a4 PE=1 SV=1	Slc27a4	0.344	1.34679e-15
Protein S100-A9 OS=Mus musculus GN=S100a9 PE=1 SV=3	S100a9	1.706	2.83445e-14
Troponin I, fast skeletal muscle (Fragment) OS=Mus musculus GN=Tnni2 PE=1 SV=1	Tnni2	0.695	2.83445e-14
Acidic leucine-rich nuclear phosphoprotein 32 family member B OS=Mus musculus GN=Anp32b PE=1 SV=1	Anp32b	1.554	2.20991e-13
Crooked neck-like protein 1 OS=Mus musculus GN=Crnkl1 PE=1 SV=1	Crnkl1	1.591	2.46525e-13
ADP/ATP translocase 1 OS=Mus musculus GN=Slc25a4 PE=1 SV=4	Slc25a4	0.654	4.04084e-13
Apolipoprotein A-II OS=Mus musculus GN=Apoa2 PE=1 SV=2	Apoa2	1.607	4.2749e-13
Beta-2-glycoprotein 1 OS=Mus musculus GN=Apoh PE=1 SV=1	Apoh	1.479	6.01775e-13
Troponin T, fast skeletal muscle OS=Mus musculus GN=Tnnt3 PE=1 SV=1	Tnnt3	0.72	8.09284e-13
Keratin, type I cytoskeletal 9 OS=Homo sapiens GN=KRT9 PE=1 SV=3	KRT9	0.675	8.48393e-13
Malonyl-CoA-acyl carrier protein transacylase, mitochondrial OS=Mus musculus GN=Mcat PE=1 SV=3	Mcat	0.685	9.75667e-13
Fibrinogen beta chain OS=Mus musculus GN=Fgb PE=1 SV=1	Fgb	1.607	1.35635e-12
Keratin, type I cytoskeletal 17 OS=Homo sapiens GN=KRT17 PE=1 SV=2	KRT17	0.614	1.40315e-12
Decorin OS=Mus musculus GN=Dcn PE=1 SV=1	Dcn	1.523	1.60836e-12
Collagen, type VI, alpha 3 OS=Mus musculus GN=Col6a3 PE=1 SV=1	Col6a3	1.623	2.43413e-12
Fibrinogen alpha chain OS=Mus musculus GN=Fga PE=1 SV=1	Fga	1.562	2.77593e-12
Keratin, type II cytoskeletal 1 OS=Homo sapiens GN=KRT1 PE=1 SV=6	KRT1	0.669	6.93184e-12
Protein-glutamine gamma-glutamyltransferase 2 OS=Mus musculus GN=Tgm2 PE=1 SV=4	Tgm2	1.564	3.10574e-11
Keratin, type I cytoskeletal 14 OS=Homo sapiens GN=KRT14 PE=1 SV=4	KRT14	0.72	3.40247e-11
Coiled-coil domain containing 83, isoform CRA_c OS=Mus musculus GN=Ccdc83 PE=4 SV=1	Ccdc83	1.597	5.76059e-11
Collagen alpha-2(V) chain OS=Mus musculus GN=Col5a2 PE=1 SV=1	Col5a2	1.921	6.989e-11
Metallothionein-1 OS=Mus musculus GN=Mt1 PE=1 SV=1	Mt1	1.468	2.07982e-10
WD repeat-containing protein 26 OS=Mus musculus GN=Wdr26 PE=1 SV=1	Wdr26	0.72	5.53819e-10
Erythrocyte membrane protein band 4.2 OS=Mus musculus GN=Epb42 PE=1 SV=3	Epb42	1.475	7.02395e-10
Alpha-2-HS-glycoprotein OS=Mus musculus GN=Ahsg PE=1 SV=1	Ahsg	1.544	9.37097e-10
Alpha-actinin-3 OS=Mus musculus GN=Actn3 PE=2 SV=1	Actn3	0.653	1.30376e-09
Epithelial membrane protein 2 OS=Mus musculus GN=Emp2 PE=1 SV=1	Emp2	1.708	1.50576e-09
Murinoglobulin-1 OS=Mus musculus GN=Mug1 PE=1 SV=3	Mug1	1.54	1.23318e-08
Zinc transporter 8 OS=Mus musculus GN=Slc30a8 PE=2 SV=1	Slc30a8	1.448	3.39061e-08
Prolargin OS=Mus musculus GN=Prelp PE=1 SV=2	Prelp	1.49	3.41407e-08
Collagen alpha-1(XV) chain OS=Mus musculus GN=Col15a1 PE=1 SV=2	Col15a1	1.471	3.73625e-08
Junctophilin-1 OS=Mus musculus GN=Jph1 PE=1 SV=1	Jph1	2.108	4.3717e-08
Sine oculis-binding protein homolog OS=Mus musculus GN=Sobp PE=1 SV=1	Sobp	1.611	4.48162e-08
Zinc finger and SCAN domain-containing 18 OS=Mus musculus GN=Zscan18 PE=1 SV=1	Zscan18	1.415	4.81529e-08
Uncharacterized protein OS=Mus musculus GN=Gm11568 PE=4 SV=1	Gm11568	0.529	6.59034e-08
Carboxylesterase 1C OS=Mus musculus GN=Ces1c PE=1 SV=4	Ces1c	1.526	9.6292e-08
Keratin, type II cuticular Hb6 OS=Mus musculus GN=Krt86 PE=2 SV=2	Krt86	0.733	2.07939e-07
Carbonic anhydrase 1 OS=Mus musculus GN=Ca1 PE=1 SV=4	Ca1	1.677	5.27609e-07
Calcium-binding protein 39-like OS=Mus musculus GN=Cab39l PE=1 SV=3	Cab39l	1.486	6.44156e-07
Keratin, type II cuticular 87 OS=Mus musculus GN=Krt87 PE=2 SV=2	Krt87	0.765	6.62767e-07
Keratin-associated protein 15-1 OS=Mus musculus GN=Krtap15-1 PE=2 SV=1	Krtap15-1	0.679	7.00097e-07
Cytochrome c oxidase subunit 7A-related protein, mitochondrial OS=Mus musculus GN=Cox7a2l PE=1 SV=1	Cox7a2l	1.354	8.62854e-07
Dual specificity protein phosphatase 26 OS=Mus musculus GN=Dusp26 PE=2 SV=2	Dusp26	0.745	1.28695e-06
Complement C3 OS=Mus musculus GN=C3 PE=1 SV=3	C3	1.365	1.41691e-06
Serum albumin OS=Mus musculus GN=Alb PE=1 SV=3	Alb	1.438	1.62416e-06
Proto-oncogene serine/threonine-protein kinase mos OS=Mus musculus GN=Mos PE=2 SV=2		1.396	1.62416e-06
Fibronectin OS=Mus musculus GN=Fn1 PE=1 SV=1	Fn1	1.398	1.66413e-06
Keratin, type I cuticular Ha3-II OS=Mus musculus GN=Krt33b PE=1 SV=2	Krt33b	0.792	2.08304e-06
Luc7-like protein 3 (Fragment) OS=Mus musculus GN=Luc7l3 PE=1 SV=1	Luc7l3	1.906	2.87063e-06
Metallothionein-2 OS=Mus musculus GN=Mt2 PE=1 SV=2	Mt2	1.42	3.03517e-06
Keratin, type II cytoskeletal 2 epidermal OS=Homo sapiens GN=KRT2 PE=1 SV=2	KRT2	0.754	3.04203e-06
Fibrinogen gamma chain OS=Mus musculus GN=Fgg PE=1 SV=1	Fgg	1.429	3.10223e-06
Hemopexin OS=Mus musculus GN=Hpx PE=1 SV=2	Hpx	1.38	3.38665e-06
Laminin subunit gamma-1 OS=Mus musculus GN=Lamc1 PE=1 SV=1	Lamc1	1.414	7.55544e-06
Galectin OS=Mus musculus GN=Pick1 PE=1 SV=1	Gm49486	0.617	8.27351e-06
Serine protease inhibitor A3B OS=Mus musculus GN=Serpina3b PE=2 SV=1	Serpina3b	1.403	8.8946e-06
Alpha-1-antitrypsin 1-2 OS=Mus musculus GN=Serpina1b PE=1 SV=2	Serpina1b	1.353	1.05434e-05
Vitronectin OS=Mus musculus GN=Vtn PE=1 SV=2	Vtn	1.349	1.06468e-05
Kininogen 2 OS=Mus musculus GN=Kng2 PE=1 SV=1	Kng2	1.569	1.07817e-05
MICOS complex subunit Mic26 OS=Mus musculus GN=Apoo PE=1 SV=2	Apoo	1.353	1.09618e-05
Keratin, type II cytoskeletal 5 OS=Homo sapiens GN=KRT5 PE=1 SV=3	KRT5	0.776	1.21328e-05
Alpha-1-antitrypsin 1-1 OS=Mus musculus GN=Serpina1a PE=1 SV=4	Serpina1a	1.347	1.55727e-05
Sphingosine 1-phosphate receptor 2 (Fragment) OS=Mus musculus GN=S1pr2 PE=1 SV=1	S1pr2	1.476	1.57339e-05
NADH-ubiquinone oxidoreductase chain 3 OS=Mus musculus GN=Mtnd3 PE=1 SV=3	mt-Nd3	1.366	1.6322e-05
Lactadherin OS=Mus musculus GN=Mfge8 PE=1 SV=3	Mfge8	0.795	2.9968e-05
Myosin-7 OS=Mus musculus GN=Myh7 PE=2 SV=1	Myh7	1.352	3.60458e-05
Actin, alpha skeletal muscle OS=Mus musculus GN=Acta1 PE=1 SV=1	Acta1	0.78	3.89768e-05
Cytochrome b OS=Mus musculus GN=Mt-Cyb PE=1 SV=1	Mt-Cyb	1.299	4.47207e-05
Keratin-associated protein 4-6 OS=Mus musculus GN=Krtap4-6 PE=1 SV=1	Krtap4-6	0.598	4.63476e-05
Carbonic anhydrase 3 OS=Mus musculus GN=Ca3 PE=1 SV=3	Ca3	1.336	5.2104e-05
Keratin, type II cuticular Hb1 OS=Mus musculus GN=Krt81 PE=2 SV=2	Krt81	0.782	5.56983e-05
Spectrin alpha chain, erythrocytic 1 OS=Mus musculus GN=Spta1 PE=1 SV=3	Spta1	1.357	5.73946e-05
NADH dehydrogenase [ubiquinone] 1 beta subcomplex subunit 6 OS=Mus musculus GN=Ndufb6 PE=1 SV=3	Ndufb6	1.373	5.84869e-05
Immunoglobulin heavy variable 10-1 (Fragment) OS=Mus musculus GN=Ighv10-1 PE=4 SV=1	Ighv10-1	0.711	6.73964e-05
Sentrin-specific protease 6 (Fragment) OS=Mus musculus GN=Senp6 PE=1 SV=1	Senp6	1.363	6.97417e-05
Plasminogen OS=Mus musculus GN=Plg PE=1 SV=3	Plg	1.393	7.41093e-05
NADH dehydrogenase [ubiquinone] 1 alpha subcomplex subunit 11 OS=Mus musculus GN=Ndufa11 PE=1 SV=2	Ndufa11	1.308	9.36204e-05
Collagen alpha-1(XII) chain OS=Mus musculus GN=Col12a1 PE=2 SV=3	Col12a1	1.312	0.000110955
Keratin, type I cuticular Ha3-I OS=Mus musculus GN=Krt33a PE=1 SV=1	Krt33a	0.8	0.000110955
Transthyretin OS=Mus musculus GN=Ttr PE=1 SV=1	Ttr	1.365	0.000115256
Eukaryotic initiation factor 4A-III OS=Mus musculus GN=Eif4a3 PE=1 SV=3	Eif4a3	0.788	0.000116282
TATA element modulatory factor OS=Mus musculus GN=Tmf1 PE=1 SV=1	Tmf1	0.546	0.000134489
NADH dehydrogenase [ubiquinone] iron-sulfur protein 3, mitochondrial OS=Mus musculus GN=Ndufs3 PE=1 SV=2	Ndufs3	1.364	0.000142062
Potassium channel subfamily T member 1 OS=Mus musculus GN=Kcnt1 PE=1 SV=1	Kcnt1	1.464	0.000146033
Dystrophin-related protein 2 OS=Mus musculus GN=Drp2 PE=1 SV=1	Drp2	1.353	0.000149076
Hemicentin-1 OS=Mus musculus GN=Hmcn1 PE=1 SV=1	Hmcn1	1.285	0.000159516
NADH dehydrogenase [ubiquinone] 1 alpha subcomplex subunit 3 OS=Mus musculus GN=Ndufa3 PE=1 SV=1	Ndufa3	1.31	0.000166701
Ig alpha chain C region OS=Mus musculus PE=1 SV=1		1.385	0.000167619
Keratin, type II cuticular Hb5 OS=Homo sapiens GN=KRT85 PE=1 SV=1	KRT85	0.786	0.000189312
Interleukin-15 receptor subunit alpha OS=Mus musculus GN=Il15ra PE=1 SV=1	Il15ra	1.39	0.000198552
Nuclear pore complex protein Nup50 OS=Mus musculus GN=Nup50 PE=1 SV=3	Nup50	0.757	0.000241888
[Pyruvate dehydrogenase (acetyl-transferring)] kinase isozyme 2, mitochondrial OS=Mus musculus GN=Pdk2 PE=1 SV=2	Pdk2	1.382	0.000343605
NADH dehydrogenase [ubiquinone] 1 beta subcomplex subunit 9 OS=Mus musculus GN=Ndufb9 PE=1 SV=3	Ndufb9	1.316	0.00035388
Tropomyosin beta chain OS=Mus musculus GN=Tpm2 PE=1 SV=1	Tpm2	0.827	0.000417763
Cytochrome c oxidase subunit 5A, mitochondrial OS=Mus musculus GN=Cox5a PE=1 SV=2	Cox5a	1.341	0.000503487
Cytochrome c oxidase subunit 6A1, mitochondrial OS=Mus musculus GN=Cox6a1 PE=1 SV=2	Cox6a1	1.296	0.000523296
ATP synthase subunit f, mitochondrial OS=Mus musculus GN=Atp5j2 PE=1 SV=1	Atp5j2	1.305	0.000550262
Putative uncharacterized protein OS=Mus musculus GN=Tpm1 PE=1 SV=1	Tpm1	0.813	0.00063768
Fibromodulin OS=Mus musculus GN=Fmod PE=2 SV=1	Fmod	1.309	0.000759241
Collagen alpha-1(XVIII) chain OS=Mus musculus GN=Col18a1 PE=1 SV=1	Col18a1	1.343	0.00076611
Myomesin 2 OS=Mus musculus GN=Myom2 PE=1 SV=1	Myom2	0.795	0.000812334
NADH dehydrogenase [ubiquinone] 1 alpha subcomplex subunit 7 OS=Mus musculus GN=Ndufa7 PE=1 SV=3	Ndufa7	1.332	0.000844856
Beta-secretase 1 OS=Mus musculus GN=Bace1 PE=1 SV=1	Bace1	1.618	0.000959397
Cell cycle exit and neuronal differentiation protein 1 OS=Mus musculus GN=Cend1 PE=1 SV=1	Cend1	1.327	0.0010657
NADH dehydrogenase [ubiquinone] flavoprotein 3, mitochondrial OS=Mus musculus GN=Ndufv3 PE=1 SV=1	Ndufv3	1.278	0.00112606
SUMO-activating enzyme subunit 2 OS=Mus musculus GN=Uba2 PE=1 SV=1	Uba2	1.369	0.00112624
Matrilin-4 OS=Mus musculus GN=Matn4 PE=1 SV=1	Matn4	1.732	0.00115501
Putative RNA-binding protein Luc7-like 1 (Fragment) OS=Mus musculus GN=Luc7l PE=1 SV=1	Luc7l	0.758	0.00116292
Chromodomain-helicase-DNA-binding protein 6 (Fragment) OS=Mus musculus GN=Chd6 PE=1 SV=8	Chd6	1.64	0.00120528
Interleukin-33 OS=Mus musculus GN=Il33 PE=1 SV=1	Il33	0.848	0.00123032
NADH-ubiquinone oxidoreductase chain 4 OS=Mus musculus GN=Mtnd4 PE=1 SV=1	Mtnd4	1.316	0.00132231
Integrin beta-4 OS=Mus musculus GN=Itgb4 PE=1 SV=1	Itgb4	1.572	0.00170483
NADH dehydrogenase [ubiquinone] 1 alpha subcomplex subunit 9, mitochondrial OS=Mus musculus GN=Ndufa9 PE=1 SV=1	Ndufa9	1.316	0.0019107
Cytochrome c oxidase subunit 1 OS=Mus musculus GN=Mtco1 PE=1 SV=2	Mtco1	1.295	0.00196075
Calcineurin binding protein 1, isoform CRA_a OS=Mus musculus GN=Cabin1 PE=1 SV=1	Cabin1	1.254	0.0022032
Actin, cytoplasmic 1 (Fragment) OS=Mus musculus GN=Actb PE=1 SV=1	Actb	0.852	0.00244214
Cytochrome b-c1 complex subunit 9 OS=Mus musculus GN=Uqcr10 PE=1 SV=1	Uqcr10	1.306	0.00285329
Presenilins-associated rhomboid-like protein, mitochondrial OS=Mus musculus GN=Parl PE=1 SV=1	Parl	1.268	0.00335695
NADH dehydrogenase [ubiquinone] 1 beta subcomplex subunit 5, mitochondrial OS=Mus musculus GN=Ndufb5 PE=1 SV=1	Ndufb5	1.303	0.00366809
NADH dehydrogenase [ubiquinone] flavoprotein 1, mitochondrial OS=Mus musculus GN=Ndufv1 PE=1 SV=1	Ndufv1	1.302	0.00395946
Autophagy protein 5 OS=Mus musculus GN=Atg5 PE=1 SV=1	Atg5	0.848	0.00419036
NADH-ubiquinone oxidoreductase chain 2 OS=Mus musculus GN=Mtnd2 PE=1 SV=2	mt-Nd2	1.275	0.00443205
Histone H1.4 OS=Mus musculus GN=Hist1h1e PE=1 SV=2	H1-4	0.831	0.0053127
Eosinophil peroxidase OS=Mus musculus GN=Epx PE=1 SV=2	Epx	1.425	0.00572938
Matrix-remodeling-associated protein 7 OS=Mus musculus GN=Mxra7 PE=1 SV=2	Mxra7	1.46	0.00579797
Keratin, type I cytoskeletal 16 OS=Homo sapiens GN=KRT16 PE=1 SV=4	KRT16	0.782	0.00587401
U4/U6 small nuclear ribonucleoprotein Prp3 OS=Mus musculus GN=Prpf3 PE=1 SV=1	Prpf3	0.781	0.00619066
Protein 1700021F05Rik OS=Mus musculus GN=1700021F05Rik PE=1 SV=2	Mtres1	1.741	0.00638583
Beta-synuclein OS=Mus musculus GN=Sncb PE=1 SV=1	Sncb	1.261	0.00668276
Protein S100-A11 OS=Mus musculus GN=S100a11 PE=1 SV=1	S100a11	1.321	0.00681988
Protein LCHN OS=Mus musculus GN=Lchn PE=2 SV=1	Dennd11	0.787	0.00759072
Peptidyl-prolyl cis-trans isomerase A OS=Mus musculus GN=Ppia PE=1 SV=2	Ppia	0.836	0.00777729
Heterogeneous nuclear ribonucleoproteins A2/B1 OS=Mus musculus GN=Hnrnpa2b1 PE=1 SV=2	Hnrnpa2b1	0.836	0.00779558
Cytochrome b-c1 complex subunit 8 OS=Mus musculus GN=Uqcrq PE=1 SV=3	Uqcrq	1.284	0.00905124
Hemoglobin subunit beta-1 OS=Mus musculus GN=Hbb-b1 PE=1 SV=2	Hbb-b1	1.487	0.00953963
Cytochrome c oxidase assembly factor 3 homolog, mitochondrial OS=Mus musculus GN=Coa3 PE=1 SV=1	Coa3	1.267	0.0097219
Protein zer-1 homolog OS=Mus musculus GN=Zer1 PE=1 SV=1	Zer1	1.625	0.00973697
Small nuclear ribonucleoprotein Sm D3 OS=Mus musculus GN=Snrpd3 PE=1 SV=1	Snrpd3	0.856	0.00991331
CTP synthase 2 OS=Mus musculus GN=Ctps2 PE=1 SV=1	Ctps2	0.826	0.0100564
von Willebrand factor A domain-containing protein 1 OS=Mus musculus GN=Vwa1 PE=1 SV=1	Vwa1	1.254	0.0101629
Keratin associated protein 13-1 OS=Mus musculus GN=Krtap13-1 PE=1 SV=1	Krtap13-1	0.799	0.010347
NADH dehydrogenase [ubiquinone] 1 alpha subcomplex subunit 2 OS=Mus musculus GN=Ndufa2 PE=1 SV=3	Ndufa2	1.281	0.0103769
UDP-glucose 4-epimerase OS=Mus musculus GN=Gale PE=1 SV=1	Gale	1.832	0.0108417
Syndecan-4 OS=Mus musculus GN=Sdc4 PE=1 SV=1	Sdc4	0.878	0.0109348
U11/U12 small nuclear ribonucleoprotein 35 kDa protein (Fragment) OS=Mus musculus GN=Snrnp35 PE=1 SV=1	Snrnp35	0.627	0.0109938
Sigma non-opioid intracellular receptor 1 OS=Mus musculus GN=Sigmar1 PE=1 SV=1	Sigmar1	1.312	0.0110244
Collagen alpha-1(IV) chain OS=Mus musculus GN=Col4a1 PE=1 SV=4	Col4a1	1.253	0.0110244
Tetratricopeptide repeat protein 30A2 OS=Mus musculus GN=Ttc30a2 PE=1 SV=1	Ttc30a2	0.838	0.0110244
60S ribosomal protein L24 OS=Mus musculus GN=Rpl24 PE=1 SV=2	Rpl24	0.842	0.0113183
NADH dehydrogenase [ubiquinone] iron-sulfur protein 6, mitochondrial OS=Mus musculus GN=Ndufs6 PE=1 SV=2	Ndufs6	1.279	0.011678
Golgin subfamily A member 1 (Fragment) OS=Mus musculus GN=Golga1 PE=1 SV=3	Golga1	1.428	0.0117198
Fc receptor-like protein 5 OS=Mus musculus GN=Fcrl5 PE=1 SV=1	Fcrl5	0.711	0.011792
Cytochrome b-c1 complex subunit 1, mitochondrial OS=Mus musculus GN=Uqcrc1 PE=1 SV=2	Uqcrc1	1.277	0.0120879
Putative uncharacterized protein OS=Mus musculus GN=Gm5615 PE=2 SV=1	Pate9	1.326	0.012172
Zinc finger protein 882 (Fragment) OS=Mus musculus GN=Zfp882 PE=4 SV=1	Zfp882	1.291	0.012172
Integrator complex subunit 13 (Fragment) OS=Mus musculus GN=Ints13 PE=1 SV=8	Ints13	0.753	0.012172
NADH dehydrogenase [ubiquinone] 1 beta subcomplex subunit 1 OS=Mus musculus GN=Ndufb1 PE=3 SV=1	Ndufb1	1.266	0.0121941
NADH dehydrogenase [ubiquinone] 1 alpha subcomplex subunit 5 OS=Mus musculus GN=Ndufa5 PE=1 SV=3	Ndufa5	1.261	0.0122888
Dynactin subunit 6 OS=Mus musculus GN=Dctn6 PE=1 SV=1	Dctn6	0.884	0.0122888
NADH dehydrogenase [ubiquinone] 1 beta subcomplex subunit 4 OS=Mus musculus GN=Ndufb4 PE=1 SV=3	Ndufb4	1.262	0.012409
CD44 antigen OS=Mus musculus GN=Cd44 PE=1 SV=1	Cd44	1.247	0.0127934
Uncharacterized protein OS=Mus musculus GN=Gm13420 PE=4 SV=1	Gm13420	1.425	0.0128236
Keratin, type I cuticular Ha4 OS=Mus musculus GN=Krt34 PE=2 SV=1	Krt34	0.844	0.0129267
Cytochrome c oxidase subunit 6B1 OS=Mus musculus GN=Cox6b1 PE=1 SV=2	Cox6b1	1.275	0.013157
Cytochrome b-c1 complex subunit 2, mitochondrial OS=Mus musculus GN=Uqcrc2 PE=1 SV=1	Uqcrc2	1.274	0.0132568
Lysosome-associated membrane glycoprotein 2 OS=Mus musculus GN=Lamp2 PE=1 SV=2	Lamp2	0.867	0.0139252
Cytochrome c oxidase subunit 7B, mitochondrial OS=Mus musculus GN=Cox7b PE=3 SV=1	Cox7b	1.249	0.0144613
Cerebellar degeneration-related protein 2-like OS=Mus musculus GN=Cdr2l PE=1 SV=1	Cdr2l	0.88	0.0150082
Metallothionein-3 OS=Mus musculus GN=Mt3 PE=1 SV=1	Mt3	1.284	0.0152211
Protein S100-A3 OS=Mus musculus GN=S100a3 PE=2 SV=1	S100a3	0.831	0.0155585
NADH dehydrogenase [ubiquinone] 1 alpha subcomplex subunit 13 OS=Mus musculus GN=Ndufa13 PE=1 SV=3	Ndufa13	1.262	0.0162967
Heat shock protein beta-1 OS=Mus musculus GN=Hspb1 PE=1 SV=3	Hspb1	1.269	0.0165352
NADH-ubiquinone oxidoreductase 75 kDa subunit, mitochondrial OS=Mus musculus GN=Ndufs1 PE=1 SV=2	Ndufs1	1.269	0.0170434
NADH dehydrogenase [ubiquinone] 1 alpha subcomplex subunit 8 OS=Mus musculus GN=Ndufa8 PE=1 SV=3	Ndufa8	1.269	0.0171357
Ufm1-specific protease 2 OS=Mus musculus GN=Ufsp2 PE=1 SV=1	Ufsp2	1.229	0.0173309
Syntaxin-6 OS=Mus musculus GN=Stx6 PE=1 SV=1	Stx6	1.254	0.0174498
Uncharacterized protein OS=Mus musculus GN=Gm20425 PE=4 SV=1		1.291	0.017775
NADH dehydrogenase [ubiquinone] iron-sulfur protein 7, mitochondrial OS=Mus musculus GN=Ndufs7 PE=1 SV=1	Ndufs7	1.255	0.017775
Cytochrome b-c1 complex subunit Rieske, mitochondrial OS=Mus musculus GN=Uqcrfs1 PE=1 SV=1	Uqcrfs1	1.266	0.018654
NADH dehydrogenase [ubiquinone] iron-sulfur protein 5 (Fragment) OS=Mus musculus GN=Ndufs5 PE=1 SV=1	Ndufs5	1.255	0.018825
NADH dehydrogenase [ubiquinone] iron-sulfur protein 2, mitochondrial OS=Mus musculus GN=Ndufs2 PE=1 SV=1	Ndufs2	1.266	0.0190686
Creatine kinase M-type OS=Mus musculus GN=Ckm PE=1 SV=1	Ckm	1.229	0.0200041
Methylenetetrahydrofolate reductase OS=Mus musculus GN=Mthfr PE=1 SV=2	Mthfr	1.252	0.0206602
Copine-6 OS=Mus musculus GN=Cpne6 PE=1 SV=1	Cpne6	1.248	0.020983
U3 small nucleolar RNA-associated protein 4 homolog OS=Mus musculus GN=Utp4 PE=2 SV=3	Utp4	1.575	0.0217117
Protein tweety homolog 2 OS=Mus musculus GN=Ttyh2 PE=1 SV=1	Ttyh2	1.415	0.0218012
Keratin, type I cytoskeletal 10 OS=Homo sapiens GN=KRT10 PE=1 SV=6	KRT10	0.854	0.0227907
EF-hand calcium-binding domain-containing protein 3 OS=Mus musculus GN=Efcab3 PE=2 SV=1	Efcab3	1.275	0.0228634
Band 3 anion transport protein OS=Mus musculus GN=Slc4a1 PE=1 SV=1	Slc4a1	1.278	0.0230373
Rap1 GTPase-activating protein 2 OS=Mus musculus GN=Rap1gap2 PE=1 SV=1	Rap1gap2	1.267	0.0237978
Proliferating cell nuclear antigen OS=Mus musculus GN=Pcna PE=1 SV=2	Pcna	0.842	0.0239046
Cytochrome c oxidase subunit 7C, mitochondrial OS=Mus musculus GN=Cox7c PE=1 SV=1	Cox7c	1.26	0.0242659
Coiled-coil domain containing 32 OS=Mus musculus GN=Ccdc32 PE=1 SV=1	Ccdc32	1.647	0.024813
Keratin, type II cuticular Hb4 OS=Mus musculus GN=Krt84 PE=2 SV=2	Krt84	0.877	0.0262599
Fatty acid-binding protein, heart OS=Homo sapiens GN=FABP3 PE=1 SV=4	FABP3	1.247	0.026428
Thrombospondin-1 OS=Mus musculus GN=Thbs1 PE=1 SV=1	Thbs1	1.278	0.0283102
NADH dehydrogenase [ubiquinone] 1 beta subcomplex subunit 10 OS=Mus musculus GN=Ndufb10 PE=1 SV=3	Ndufb10	1.256	0.0287551
Keratin, type I cuticular Ha3-I OS=Homo sapiens GN=KRT33A PE=2 SV=2	KRT33A	0.836	0.0296971
Microfibril-associated glycoprotein 4 OS=Mus musculus GN=Mfap4 PE=1 SV=1	Mfap4	1.541	0.0297033
Pregnancy zone protein OS=Mus musculus GN=Pzp PE=1 SV=3	Pzp	1.27	0.031265
Amine oxidase [flavin-containing] B OS=Mus musculus GN=Maob PE=1 SV=4	Maob	1.269	0.0327569
Histone H1.1 OS=Mus musculus GN=Hist1h1a PE=1 SV=2	H1-1	0.876	0.0331813
ADP/ATP translocase 2 OS=Mus musculus GN=Slc25a5 PE=1 SV=3	Slc25a5	0.86	0.0334137
WD repeat-containing protein 59 OS=Mus musculus GN=Wdr59 PE=1 SV=2	Wdr59	1.323	0.0335206
Prothrombin OS=Mus musculus GN=F2 PE=1 SV=1	F2	1.281	0.03489
39S ribosomal protein L35, mitochondrial OS=Mus musculus GN=Mrpl35 PE=2 SV=1	Mrpl35	0.835	0.0357998
F-box/WD repeat-containing protein 11 OS=Mus musculus GN=Fbxw11 PE=1 SV=1	Fbxw11	0.855	0.0363627
NADH dehydrogenase [ubiquinone] 1 alpha subcomplex subunit 10, mitochondrial OS=Mus musculus GN=Ndufa10 PE=1 SV=1	Ndufa10	1.25	0.0371853
Platelet-activating factor acetylhydrolase IB subunit beta (Fragment) OS=Mus musculus GN=Pafah1b2 PE=1 SV=1	Pafah1b2	1.225	0.0387948
Inter-alpha-trypsin inhibitor heavy chain H3 OS=Mus musculus GN=Itih3 PE=1 SV=1	Itih3	1.238	0.0390929
Non-specific serine/threonine protein kinase (Fragment) OS=Mus musculus GN=Mark2 PE=1 SV=1	Mark2	1.24	0.0404013
Nebulin OS=Mus musculus GN=Neb PE=1 SV=1	Neb	0.87	0.0413343
Peptidyl-prolyl cis-trans isomerase NIMA-interacting 1 OS=Mus musculus GN=Pin1 PE=1 SV=1	Pin1	1.257	0.0413373
Activated RNA polymerase II transcriptional coactivator p15 OS=Mus musculus GN=Sub1 PE=1 SV=3	Sub1	1.261	0.0419342
Nucleoside diphosphate kinase OS=Mus musculus GN=Gm20390 PE=3 SV=1	Gm20390	0.864	0.042957
FUN14 domain-containing protein 2 OS=Mus musculus GN=Fundc2 PE=1 SV=1	Fundc2	1.246	0.0429951
Plasmolipin OS=Mus musculus GN=Pllp PE=1 SV=1	Pllp	1.249	0.0446076
Non-specific lipid-transfer protein OS=Mus musculus GN=Scp2 PE=1 SV=3	Scp2	1.206	0.0467815
ProSAAS OS=Mus musculus GN=Pcsk1n PE=1 SV=2	Pcsk1n	1.225	0.0471499
Coiled-coil domain-containing protein 127 (Fragment) OS=Mus musculus GN=Ccdc127 PE=1 SV=1	Ccdc127	1.205	0.0471499
Selenocysteine lyase OS=Mus musculus GN=Scly PE=1 SV=1	Scly	0.732	0.0471499
Cytochrome c oxidase subunit 7A2, mitochondrial OS=Mus musculus GN=Cox7a2 PE=1 SV=2	Cox7a2	1.243	0.0475665
PDZ domain-containing 2 OS=Mus musculus GN=Pdzd2 PE=1 SV=1	Pdzd2	1.27	0.0477624
Nidogen-1 OS=Mus musculus GN=Nid1 PE=1 SV=2	Nid1	1.243	0.0479416
MICOS complex subunit Mic10 OS=Mus musculus GN=Minos1 PE=1 SV=1	Micos10	1.222	0.0487263
Myosin-binding protein C, fast-type OS=Mus musculus GN=Mybpc2 PE=1 SV=1	Mybpc2	1.223	0.050227
NADH dehydrogenase [ubiquinone] 1 alpha subcomplex subunit 6 OS=Mus musculus GN=Ndufa6 PE=1 SV=1	Ndufa6	1.243	0.0514659
Phosphatidylinositide phosphatase SAC2 OS=Mus musculus GN=Inpp5f PE=1 SV=1	Inpp5f	1.22	0.0528483
Putative transferase CAF17 homolog, mitochondrial (Fragment) OS=Mus musculus GN=Iba57 PE=1 SV=1	Iba57	1.231	0.0541332
Protein FAM92A1 OS=Mus musculus GN=Fam92a1 PE=1 SV=1	Cibar1	0.757	0.0541332
Tubulin beta-2A chain OS=Mus musculus GN=Tubb2a PE=1 SV=1	Tubb2a	0.868	0.0542282
General transcription factor 3C polypeptide 1 OS=Mus musculus GN=Gtf3c1 PE=1 SV=2	Gtf3c1	0.821	0.0548754
Alpha-actinin-4 OS=Mus musculus GN=Actn4 PE=1 SV=1	Actn4	0.833	0.0550536
Cytochrome b-c1 complex subunit 6, mitochondrial OS=Mus musculus GN=Uqcrh PE=1 SV=2	Uqcrh	1.239	0.0558895
A kinase (PRKA) anchor protein 11 OS=Mus musculus GN=Akap11 PE=1 SV=1	Akap11	0.737	0.0566009
RNA-binding protein 10 OS=Mus musculus GN=Rbm10 PE=1 SV=1	Rbm10	1.202	0.059843
Rho GTPase-activating protein 22 OS=Mus musculus GN=Arhgap22 PE=1 SV=2	Arhgap22	0.682	0.0603687
Syndecan-2 OS=Mus musculus GN=Sdc2 PE=1 SV=1	Sdc2	0.868	0.0604314
60S ribosomal protein L37a OS=Mus musculus GN=Rpl37a PE=1 SV=2	Rpl37a	0.887	0.0608368
Exocyst complex component OS=Mus musculus GN=Exoc6 PE=1 SV=1	Exoc6	0.846	0.0620527
Prothymosin alpha OS=Mus musculus GN=Ptma PE=1 SV=2	Ptma	1.247	0.0622274
14-3-3 protein eta OS=Mus musculus GN=Ywhah PE=1 SV=2	Ywhah	0.871	0.0622274
Cytochrome c1, heme protein, mitochondrial OS=Mus musculus GN=Cyc1 PE=1 SV=1	Cyc1	1.236	0.0623049
NADH dehydrogenase [ubiquinone] iron-sulfur protein 8, mitochondrial OS=Mus musculus GN=Ndufs8 PE=1 SV=1	Ndufs8	1.224	0.0639371
NEDD8 OS=Homo sapiens GN=NEDD8 PE=1 SV=1	NEDD8	1.387	0.0668685
Periodic tryptophan protein 1 homolog OS=Mus musculus GN=Pwp1 PE=1 SV=1	Pwp1	0.893	0.0670046
Keratin-associated protein 19-5 OS=Mus musculus GN=Krtap19-5 PE=1 SV=1	Krtap19-5	0.857	0.0678443
Achaete-scute homolog 1 OS=Mus musculus GN=Ascl1 PE=1 SV=2	Ascl1	1.206	0.0680809
Lipoprotein lipase OS=Mus musculus GN=Lpl PE=1 SV=3	Lpl	0.794	0.0687649
Cytochrome b-c1 complex subunit 7 OS=Mus musculus GN=Uqcrb PE=1 SV=1	Uqcrb	1.233	0.0688514
WD repeat-containing protein 91 OS=Mus musculus GN=Wdr91 PE=1 SV=1	Wdr91	0.87	0.0713582
Cytochrome c oxidase subunit 6C OS=Mus musculus GN=Cox6c PE=1 SV=3	Cox6c	1.232	0.0719129
Dual specificity mitogen-activated protein kinase kinase 4 OS=Mus musculus GN=Map2k4 PE=1 SV=2	Map2k4	1.238	0.0720517
MCG1051009 OS=Mus musculus GN=Serpina3k PE=1 SV=1	Serpina3k	1.226	0.0720517
WD repeat-containing protein 13 (Fragment) OS=Mus musculus GN=Wdr13 PE=1 SV=8	Wdr13	1.311	0.0735866
Fer-1-like protein 4 OS=Mus musculus GN=Fer1l4 PE=4 SV=1	Fer1l4	0.705	0.0739496
ATP synthase subunit g, mitochondrial OS=Mus musculus GN=Atp5l PE=1 SV=1	Atp5mg	0.893	0.0751303
Nuclear ubiquitous casein and cyclin-dependent kinase substrate 1 OS=Mus musculus GN=Nucks1 PE=1 SV=1	Nucks1	1.24	0.0759465
Ciliary neurotrophic factor OS=Mus musculus GN=Cntf PE=2 SV=1	Cntf	1.243	0.0762665
Phosphoinositide 3-kinase regulatory subunit 6 OS=Mus musculus GN=Pik3r6 PE=1 SV=1	Pik3r6	1.357	0.0764595
Apolipoprotein D OS=Mus musculus GN=Apod PE=1 SV=1	Apod	1.223	0.0764595
Glutaminyl-tRNA synthetase OS=Mus musculus GN=Qars PE=1 SV=1	Qars1	0.903	0.0801673
Exosome component 10 OS=Mus musculus GN=Exosc10 PE=1 SV=2	Exosc10	1.342	0.0820394
AHNAK nucleoprotein (desmoyokin) OS=Mus musculus GN=Ahnak PE=1 SV=1	Ahnak	1.228	0.0837539
Myosin-1 OS=Mus musculus GN=Myh1 PE=1 SV=1	Myh1	0.888	0.0875166
T-complex protein 1 subunit zeta-2 OS=Mus musculus GN=Cct6b PE=1 SV=4	Cct6b	0.872	0.0875166
Integrin-linked kinase-associated serine/threonine phosphatase 2C OS=Mus musculus GN=Ilkap PE=1 SV=1	Ilkap	1.476	0.0898879
Myosin-binding protein C, slow-type OS=Mus musculus GN=Mybpc1 PE=1 SV=1	Mybpc1	0.824	0.0909964
Acetoacetyl-CoA synthetase OS=Mus musculus GN=Aacs PE=1 SV=1	Aacs	0.916	0.0917637
Family with sequence similarity 104, member A OS=Mus musculus GN=Fam104a PE=1 SV=1	Fam104a	0.691	0.0932172
NPC1-like 1 OS=Mus musculus GN=Npc1l1 PE=1 SV=1	Npc1l1	0.904	0.0949824
Transmembrane protein 126A OS=Mus musculus GN=Tmem126a PE=1 SV=1	Tmem126a	1.235	0.0979425
Gamma-synuclein OS=Mus musculus GN=Sncg PE=1 SV=1	Sncg	1.22	0.0981668
Enoyl-[acyl-carrier-protein] reductase, mitochondrial OS=Mus musculus GN=Mecr PE=1 SV=2	Mecr	1.237	0.0986934
Mitochondrial import receptor subunit TOM7 homolog OS=Mus musculus GN=Tomm7 PE=3 SV=1	Tomm7	1.205	0.0987602
Maturin OS=Mus musculus GN=Mturn PE=1 SV=1	Mturn	0.767	0.10125
Cell division cycle protein 16 homolog OS=Mus musculus GN=Cdc16 PE=1 SV=1	Cdc16	0.925	0.101407
Myelin basic protein (Fragment) OS=Mus musculus GN=Mbp PE=1 SV=1		0.881	0.101666
Immunoglobulin heavy constant gamma 2B (Fragment) OS=Mus musculus GN=Ighg2b PE=1 SV=1	Ighg2b	1.204	0.102576
E3 ubiquitin-protein ligase MGRN1 OS=Mus musculus GN=Mgrn1 PE=1 SV=2	Mgrn1	1.45	0.102963
ATPase inhibitor, mitochondrial OS=Mus musculus GN=Atpif1 PE=1 SV=2	Atp5if1	1.235	0.10465
Protein phosphatase 1 regulatory subunit 1A OS=Mus musculus GN=Ppp1r1a PE=1 SV=1	Ppp1r1a	1.302	0.105371
39S ribosomal protein L45, mitochondrial OS=Mus musculus GN=Mrpl45 PE=1 SV=1	Mrpl45	1.187	0.105371
Vesicular inhibitory amino acid transporter OS=Mus musculus GN=Slc32a1 PE=1 SV=3	Slc32a1	1.203	0.106315
Cytochrome c oxidase subunit 3 OS=Mus musculus GN=mt-Co3 PE=1 SV=2	mt-Co3	1.289	0.106602
F-box only protein 9 OS=Mus musculus GN=Fbxo9 PE=1 SV=1	Fbxo9	1.572	0.110142
Janus kinase and microtubule-interacting protein 2 OS=Mus musculus GN=Jakmip2 PE=1 SV=2	Jakmip2	1.237	0.1103
OCIA domain-containing protein 2 OS=Mus musculus GN=Ociad2 PE=1 SV=1	Ociad2	1.22	0.110688
Thioredoxin-dependent peroxide reductase, mitochondrial OS=Mus musculus GN=Prdx3 PE=1 SV=1	Prdx3	1.21	0.112914
Peroxisomal acyl-coenzyme A oxidase 2 OS=Mus musculus GN=Acox2 PE=1 SV=2	Acox2	0.877	0.113292
Ig mu chain C region OS=Mus musculus GN=Ighm PE=1 SV=2	Ighm	1.223	0.113309
Pre-B-cell leukemia transcription factor-interacting protein 1 OS=Mus musculus GN=Pbxip1 PE=1 SV=2	Pbxip1	0.913	0.113309
Monoglyceride lipase OS=Mus musculus GN=Mgll PE=1 SV=1	Mgll	1.441	0.115467
1-acyl-sn-glycerol-3-phosphate acyltransferase epsilon OS=Mus musculus GN=Agpat5 PE=2 SV=2	Agpat5	1.189	0.115467
Farnesyl pyrophosphate synthase (Fragment) OS=Mus musculus GN=Fdps PE=4 SV=1	Fdps	1.23	0.115497
NADH dehydrogenase [ubiquinone] 1 beta subcomplex subunit 3 OS=Mus musculus GN=Ndufb3 PE=1 SV=1	Ndufb3	1.207	0.115945
Zinc transporter 9 OS=Mus musculus GN=Slc30a9 PE=1 SV=2	Slc30a9	1.202	0.116427
28 kDa heat- and acid-stable phosphoprotein OS=Mus musculus GN=Pdap1 PE=1 SV=1	Pdap1	1.204	0.117785
Tyrosine-protein kinase Lyn OS=Mus musculus GN=Lyn PE=1 SV=4	Lyn	0.917	0.119607
Pleckstrin homology domain-containing family A member 1 OS=Mus musculus GN=Plekha1 PE=1 SV=1	Plekha1	1.576	0.119634
NADH dehydrogenase [ubiquinone] 1 subunit C2 OS=Mus musculus GN=Ndufc2 PE=1 SV=1	Ndufc2	1.207	0.119634
Keratin, type I cuticular Ha1 OS=Mus musculus GN=Krt31 PE=1 SV=2	Krt31	0.922	0.120451
Chloride channel protein OS=Mus musculus GN=Clcn2 PE=1 SV=1	Clcn2	0.913	0.12507
ATP synthase subunit delta, mitochondrial OS=Mus musculus GN=Atp5d PE=1 SV=1	Atp5f1d	1.216	0.12548
Complement factor H OS=Mus musculus GN=Cfh PE=1 SV=2	Cfh	1.216	0.12548
SPATS2-like protein (Fragment) OS=Mus musculus GN=Spats2l PE=1 SV=1	Spats2l	0.848	0.12548
Integrin beta-1 OS=Mus musculus GN=Itgb1 PE=1 SV=1	Itgb1	1.211	0.127853
Protein CYR61 OS=Mus musculus GN=Cyr61 PE=1 SV=1	Ccn1	0.854	0.129624
Cytochrome c oxidase subunit 5B, mitochondrial OS=Mus musculus GN=Cox5b PE=1 SV=1	Cox5b	1.214	0.130182
Long-chain-specific acyl-CoA dehydrogenase, mitochondrial OS=Mus musculus GN=Acadl PE=1 SV=1	Acadl	1.205	0.130182
CD59A glycoprotein OS=Mus musculus GN=Cd59a PE=2 SV=1	Cd59a	1.201	0.130182
NADH dehydrogenase [ubiquinone] 1 beta subcomplex subunit 8, mitochondrial OS=Mus musculus GN=Ndufb8 PE=1 SV=1	Ndufb8	1.197	0.131999
Nebulin-related-anchoring protein OS=Mus musculus GN=Nrap PE=1 SV=1	Nrap	0.907	0.131999
Vesicular glutamate transporter 1 OS=Mus musculus GN=Slc17a7 PE=1 SV=1	Slc17a7	1.299	0.133704
DNA methyltransferase 1-associated protein 1 OS=Mus musculus GN=Dmap1 PE=1 SV=1	Dmap1	0.866	0.133704
Bile salt export pump OS=Mus musculus GN=Abcb11 PE=1 SV=1	Abcb11	1.362	0.137431
Stromal interaction molecule 2 OS=Mus musculus GN=Stim2 PE=1 SV=2	Stim2	1.307	0.13783
ATP-binding cassette sub-family B member 7, mitochondrial OS=Mus musculus GN=Abcb7 PE=1 SV=3	Abcb7	1.178	0.139003
E3 ubiquitin-protein ligase RNF14 OS=Mus musculus GN=Rnf14 PE=1 SV=2	Rnf14	0.915	0.142472
Bcl-2-like protein 13 OS=Mus musculus GN=Bcl2l13 PE=1 SV=2	Bcl2l13	1.225	0.142513
Echinoderm microtubule-associated protein-like 1 OS=Mus musculus GN=Eml1 PE=1 SV=1	Eml1	0.903	0.143407
Chondroadherin OS=Mus musculus GN=Chad PE=2 SV=1	Chad	1.462	0.148775
Phosphoenolpyruvate carboxykinase [GTP], mitochondrial OS=Mus musculus GN=Pck2 PE=1 SV=1	Pck2	0.814	0.149193
Metal transporter CNNM3 OS=Mus musculus GN=Cnnm3 PE=1 SV=2	Cnnm3	0.809	0.14957
Phospholipase DDHD1 OS=Mus musculus GN=Ddhd1 PE=1 SV=1	Ddhd1	0.917	0.151484
Stathmin-4 OS=Mus musculus GN=Stmn4 PE=1 SV=1	Stmn4	0.925	0.15275
Zinc finger Ran-binding domain-containing protein 2 OS=Mus musculus GN=Zranb2 PE=1 SV=2	Zranb2	0.923	0.153115
Tomoregulin-1 (Fragment) OS=Mus musculus GN=Tmeff1 PE=1 SV=1	Tmeff1	0.908	0.153872
Extracellular sulfatase Sulf-2 OS=Mus musculus GN=Sulf2 PE=2 SV=2	Sulf2	0.863	0.155376
Myosin-8 OS=Mus musculus GN=Myh8 PE=2 SV=2	Myh8	0.759	0.155376
Taste receptor type 2 member 103 OS=Mus musculus GN=Tas2r103 PE=2 SV=2	Tas2r103	0.926	0.155425
Threonine synthase-like 2 OS=Mus musculus GN=Thnsl2 PE=1 SV=1	Thnsl2	1.443	0.161492
Transcription factor SOX-5 (Fragment) OS=Mus musculus GN=Sox5 PE=4 SV=2	Sox5	0.892	0.162034
SWI/SNF-related matrix-associated actin-dependent regulator of chromatin subfamily D member 1 OS=Mus musculus GN=Smarcd1 PE=1 SV=3	Smarcd1	0.734	0.162034
Sphingomyelin synthase-related protein 1 OS=Mus musculus GN=Samd8 PE=2 SV=1	Samd8	0.893	0.162764
Mitochondrial import receptor subunit TOM70 OS=Mus musculus GN=Tomm70 PE=1 SV=2	Tomm70	1.207	0.16322
V-type proton ATPase subunit E 1 OS=Mus musculus GN=Atp6v1e1 PE=1 SV=2	Atp6v1e1	0.892	0.166043
Zinc finger RNA-binding protein OS=Mus musculus GN=Zfr PE=1 SV=2	Zfr	1.292	0.16679
Laminin subunit beta-2 OS=Mus musculus GN=Lamb2 PE=1 SV=2	Lamb2	1.206	0.167134
Bone marrow stromal antigen 2 OS=Mus musculus GN=Bst2 PE=1 SV=1	Bst2	0.919	0.167134
Leucine-rich repeat and calponin homology domain-containing protein 1 OS=Mus musculus GN=Lrch1 PE=1 SV=2	Lrch1	0.877	0.167134
Voltage-dependent anion-selective channel protein 2 (Fragment) OS=Mus musculus GN=Vdac2 PE=1 SV=1	Vdac2	1.206	0.170512
Prenylcysteine oxidase-like OS=Mus musculus GN=Pcyox1l PE=1 SV=1	Pcyox1l	0.934	0.170512
Family with sequence similarity 107, member A OS=Mus musculus GN=Fam107a PE=1 SV=1	Fam107a	1.203	0.170744
Laminin subunit alpha-4 OS=Mus musculus GN=Lama4 PE=1 SV=2	Lama4	1.201	0.170744
Proline-rich transmembrane protein 2 OS=Mus musculus GN=Prrt2 PE=1 SV=1	Prrt2	0.921	0.170744
Retinol-binding protein 1 OS=Mus musculus GN=Rbp1 PE=1 SV=2	Rbp1	1.178	0.171129
Ras-related protein Rab-5A OS=Mus musculus GN=Rab5a PE=1 SV=1	Rab5a	1.173	0.175441
Gap junction beta-6 protein (Fragment) OS=Mus musculus GN=Gjb6 PE=1 SV=1	Gjb6	0.935	0.1766
DnaJ homolog subfamily C member 30 OS=Mus musculus GN=Dnajc30 PE=1 SV=1	Dnajc30	1.295	0.177722
Semaphorin-3C OS=Mus musculus GN=Sema3c PE=1 SV=2	Sema3c	0.867	0.178574
Deoxynucleotidyltransferase terminal-interacting protein 2 OS=Mus musculus GN=Dnttip2 PE=1 SV=1	Dnttip2	0.858	0.178574
Ppm1b protein OS=Mus musculus GN=Ppm1b PE=1 SV=1	Ppm1b	1.308	0.179035
Focadhesin OS=Mus musculus GN=Focad PE=1 SV=1	Focad	1.291	0.17999
Alpha-1-antitrypsin 1-4 OS=Mus musculus GN=Serpina1d PE=1 SV=1	Serpina1d	1.293	0.18096
Vesicle transport protein OS=Mus musculus GN=Sft2d2 PE=1 SV=1	Sft2d2	0.925	0.184519
Protein sprouty homolog 2 OS=Mus musculus GN=Spry2 PE=2 SV=1	Spry2	0.866	0.184519
Dapper homolog 3 OS=Mus musculus GN=Dact3 PE=1 SV=1	Dact3	0.887	0.184992
Uncharacterized protein OS=Mus musculus GN=Gm20489 PE=4 SV=1	Gm20489	0.753	0.193749
Capping protein (Actin filament) muscle Z-line, alpha 1 OS=Mus musculus GN=Capza1 PE=1 SV=1	Capza1	0.909	0.195875
Inactive ribonuclease-like protein 9 OS=Mus musculus GN=Rnase9 PE=2 SV=1	Rnase9	0.93	0.197827
Protein S100-A8 OS=Mus musculus GN=S100a8 PE=1 SV=3	S100a8	1.291	0.198431
Complement component 1 Q subcomponent-binding protein, mitochondrial OS=Mus musculus GN=C1qbp PE=1 SV=1	C1qbp	1.192	0.200345
Voltage-dependent anion-selective channel protein 1 OS=Mus musculus GN=Vdac1 PE=1 SV=3	Vdac1	1.2	0.200506
Islet cell autoantigen 1 OS=Mus musculus GN=Ica1 PE=1 SV=1	Ica1	0.932	0.200506
SUN domain-containing protein 2 OS=Mus musculus GN=Sun2 PE=1 SV=3	Sun2	1.188	0.20109
Calcium/calmodulin-dependent protein kinase II inhibitor 2 OS=Mus musculus GN=Camk2n2 PE=1 SV=1	Camk2n2	1.227	0.201766
Glycogen phosphorylase, muscle form OS=Mus musculus GN=Pygm PE=1 SV=3	Pygm	1.2	0.201766
NADH dehydrogenase [ubiquinone] flavoprotein 2, mitochondrial OS=Mus musculus GN=Ndufv2 PE=1 SV=2	Ndufv2	1.2	0.202946
Acylpyruvase FAHD1, mitochondrial OS=Mus musculus GN=Fahd1 PE=1 SV=2	Fahd1	1.206	0.203086
Desmin OS=Mus musculus GN=Des PE=1 SV=3	Des	0.907	0.203086
Cytochrome c oxidase assembly protein COX14 OS=Mus musculus GN=Cox14 PE=3 SV=1	Cox14	1.186	0.203574
MICOS complex subunit (Fragment) OS=Mus musculus GN=Chchd3 PE=1 SV=1	Chchd3	1.165	0.203694
Mitochondrial fission process protein 1 OS=Mus musculus GN=Mtfp1 PE=1 SV=1	Mtfp1	1.203	0.203932
Tripeptidyl-peptidase 1 OS=Mus musculus GN=Tpp1 PE=1 SV=2	Tpp1	0.879	0.204441
NADH-ubiquinone oxidoreductase chain 1 OS=Mus musculus GN=Mtnd1 PE=1 SV=3	Mtnd1	1.195	0.20582
ATP synthase-coupling factor 6, mitochondrial OS=Mus musculus GN=Atp5j PE=1 SV=1	Atp5pf	1.2	0.206098
WASH complex subunit 2 (Fragment) OS=Mus musculus GN=Washc2 PE=1 SV=1	Washc2	0.907	0.206098
Adenine phosphoribosyltransferase OS=Mus musculus GN=Aprt PE=1 SV=2	Aprt	0.808	0.206098
Myoglobin OS=Mus musculus GN=Mb PE=1 SV=3	Mb	1.286	0.206957
Corticotropin-releasing factor-binding protein OS=Mus musculus GN=Crhbp PE=2 SV=1	Crhbp	1.347	0.209797
Multidrug resistance protein 1A OS=Mus musculus GN=Abcb1a PE=1 SV=3	Abcb1a	1.187	0.210033
Ammonium transporter Rh type A OS=Mus musculus GN=Rhag PE=1 SV=1	Rhag	0.904	0.210059
Pleckstrin homology domain-containing family H member 3 OS=Mus musculus GN=Plekhh3 PE=2 SV=1	Plekhh3	0.748	0.213487
Anaphase-promoting complex subunit 13 OS=Mus musculus GN=Anapc13 PE=3 SV=1	Anapc13	1.213	0.215411
Outer dense fiber protein 3 OS=Mus musculus GN=Odf3 PE=4 SV=1	Odf3	0.912	0.219331
Dual specificity protein phosphatase 15 OS=Mus musculus GN=Dusp15 PE=2 SV=3	Dusp15	0.916	0.219466
RWD domain-containing protein 2A OS=Mus musculus GN=Rwdd2a PE=1 SV=1	Rwdd2a	1.236	0.222264
Cytochrome P450, family 4, subfamily f, polypeptide 40 OS=Mus musculus GN=Cyp4f40 PE=1 SV=1	Cyp4f40	1.464	0.222948
Ganglioside-induced differentiation-associated protein 1 OS=Mus musculus GN=Gdap1 PE=1 SV=1	Gdap1	1.2	0.222948
39S ribosomal protein L1, mitochondrial OS=Mus musculus GN=Mrpl1 PE=1 SV=2	Mrpl1	0.896	0.222948
Heat shock protein beta-6 OS=Mus musculus GN=Hspb6 PE=1 SV=1	Hspb6	1.193	0.225348
Hexokinase 1, isoform CRA_f OS=Mus musculus GN=Hk1 PE=1 SV=1	Hk1	1.196	0.225387
CDGSH iron-sulfur domain-containing protein 1 OS=Mus musculus GN=Cisd1 PE=1 SV=1	Cisd1	1.203	0.226675
H/ACA ribonucleoprotein complex subunit 3 OS=Mus musculus GN=Nop10 PE=3 SV=1	Nop10	1.219	0.22919
Protein CASC4 OS=Mus musculus GN=Casc4 PE=1 SV=1	Golm2	0.902	0.22919
Zinc finger and BTB domain-containing protein 20 OS=Mus musculus GN=Zbtb20 PE=1 SV=1	Zbtb20	0.918	0.237291
Microtubule-associated serine/threonine-protein kinase 4 (Fragment) OS=Mus musculus GN=Mast4 PE=1 SV=1		0.868	0.240788
Metaxin-1 OS=Mus musculus GN=Mtx1 PE=1 SV=1	Mtx1	1.191	0.242982
Vacuolar protein sorting-associated protein 4A OS=Mus musculus GN=Vps4a PE=1 SV=1	Vps4a	1.185	0.242982
Transcription factor A, mitochondrial OS=Mus musculus GN=Tfam PE=1 SV=1	Tfam	1.185	0.242982
Metal regulatory transcription factor 1 OS=Mus musculus GN=Mtf1 PE=1 SV=2	Mtf1	0.915	0.242982
Guanine nucleotide exchange factor VAV2 OS=Mus musculus GN=Vav2 PE=1 SV=1	Vav2	0.871	0.242982
Peptide-N(4)-(N-acetyl-beta-glucosaminyl)asparagine amidase OS=Mus musculus GN=Ngly1 PE=1 SV=2	Ngly1	0.91	0.243859
Methyl-CpG-binding domain protein 1 OS=Mus musculus GN=Mbd1 PE=1 SV=2	Mbd1	0.861	0.247842
Phosphoinositide-3-kinase, class 2, beta polypeptide (Fragment) OS=Mus musculus GN=Pik3c2b PE=1 SV=1	Pik3c2b	1.313	0.249726
Transcription factor EB OS=Mus musculus GN=Tfeb PE=1 SV=2	Tfeb	1.208	0.249726
Mitochondrial import receptor subunit TOM22 homolog OS=Mus musculus GN=Tomm22 PE=1 SV=3	Tomm22	1.166	0.249935
ADP-ribosylation factor-like protein 8A OS=Mus musculus GN=Arl8a PE=1 SV=1	Arl8a	0.938	0.250539
DIA3 OS=Mus musculus GN=Diaph2 PE=1 SV=1	Diaph2	1.273	0.25086
ATP-binding cassette sub-family B member 8, mitochondrial OS=Mus musculus GN=Abcb8 PE=1 SV=1	Abcb8	0.904	0.253693
ATP-binding cassette sub-family B member 6, mitochondrial OS=Mus musculus GN=Abcb6 PE=1 SV=1	Abcb6	0.757	0.254693
UDP-galactose translocator (Fragment) OS=Mus musculus GN=Slc35a2 PE=4 SV=1	Slc35a2	1.194	0.255074
GTP:AMP phosphotransferase AK3, mitochondrial OS=Mus musculus GN=Ak3 PE=1 SV=3	Ak3	1.181	0.255123
2',3'-cyclic-nucleotide 3'-phosphodiesterase OS=Mus musculus GN=Cnp PE=1 SV=3	Cnp	0.904	0.25538
TBC1 domain family member 13 OS=Mus musculus GN=Tbc1d13 PE=1 SV=1	Tbc1d13	1.312	0.256669
Geranylgeranyl transferase type-2 subunit beta OS=Mus musculus GN=Rabggtb PE=1 SV=1	Rabggtb	0.878	0.256832
Adenylate cyclase type 5 OS=Mus musculus GN=Adcy5 PE=1 SV=2	Adcy5	0.903	0.2595
NADH-ubiquinone oxidoreductase chain 5 OS=Mus musculus GN=Mtnd5 PE=1 SV=3	Mtnd5	1.182	0.261717
NADH dehydrogenase [ubiquinone] 1 beta subcomplex subunit 11, mitochondrial OS=Mus musculus GN=Ndufb11 PE=1 SV=2	Ndufb11	1.192	0.26313
Surfeit locus protein 6 OS=Mus musculus GN=Surf6 PE=1 SV=1	Surf6	0.897	0.263482
Nucleosome assembly protein 1-like 3 OS=Mus musculus GN=Nap1l3 PE=2 SV=1	Nap1l3	1.452	0.26516
Leucine-rich repeat LGI family member 4 OS=Mus musculus GN=Lgi4 PE=1 SV=1	Lgi4	0.893	0.268126
Lys-63-specific deubiquitinase BRCC36 OS=Mus musculus GN=Brcc3 PE=1 SV=1	Brcc3	0.882	0.268126
2'-5'-oligoadenylate synthase 1A OS=Mus musculus GN=Oas1a PE=1 SV=2	Oas1a	0.905	0.269717
Copine-2 OS=Mus musculus GN=Cpne2 PE=1 SV=1	Cpne2	1.205	0.271083
Guanylate binding protein 8 OS=Mus musculus GN=Gbp8 PE=1 SV=1	Gbp8	0.869	0.271497
Trifunctional enzyme subunit beta, mitochondrial OS=Mus musculus GN=Hadhb PE=1 SV=1	Hadhb	1.18	0.271553
Glycosaminoglycan xylosylkinase OS=Mus musculus GN=Fam20b PE=1 SV=1	Fam20b	0.875	0.271553
Immunoglobulin-binding protein 1 OS=Mus musculus GN=Igbp1 PE=1 SV=1	Igbp1	1.252	0.273971
Transcription elongation regulator 1 OS=Mus musculus GN=Tcerg1 PE=1 SV=2	Tcerg1	1.264	0.274952
Cytochrome c, somatic OS=Mus musculus GN=Cycs PE=1 SV=2	Cycs	1.188	0.275389
MCG1407, isoform CRA_a OS=Mus musculus GN=Rpf2 PE=1 SV=1	Rpf2	0.907	0.284095
ES1 protein homolog, mitochondrial OS=Mus musculus GN=D10Jhu81e PE=1 SV=1	Gatd3	1.184	0.29042
Calcium signal-modulating cyclophilin ligand OS=Mus musculus GN=Camlg PE=1 SV=2	Camlg	1.319	0.290561
Ig kappa chain V-III region PC 6684 OS=Mus musculus PE=1 SV=1		1.268	0.290561
NADH dehydrogenase [ubiquinone] 1 alpha subcomplex subunit 12 OS=Mus musculus GN=Ndufa12 PE=1 SV=2	Ndufa12	1.187	0.290561
Lysozyme C-2 OS=Mus musculus GN=Lyz2 PE=1 SV=2	Lyz2	0.944	0.290561
Aquaporin 4, isoform CRA_a OS=Mus musculus GN=Aqp4 PE=1 SV=1	Aqp4	1.186	0.293095
Succinate dehydrogenase assembly factor 4, mitochondrial OS=Mus musculus GN=Sdhaf4 PE=3 SV=2	Sdhaf4	1.245	0.293639
Annexin A1 OS=Mus musculus GN=Anxa1 PE=1 SV=2	Anxa1	1.243	0.294537
Tubulin-specific chaperone A OS=Mus musculus GN=Tbca PE=1 SV=3	Tbca	1.18	0.294537
Succinate-semialdehyde dehydrogenase, mitochondrial OS=Mus musculus GN=Aldh5a1 PE=1 SV=1	Aldh5a1	1.178	0.294699
Tenascin OS=Mus musculus GN=Tnc PE=1 SV=1	Tnc	1.172	0.29788
Adenomatosis polyposis coli OS=Mus musculus GN=Apc PE=1 SV=1	Apc	0.933	0.29788
Chromogranin-A OS=Mus musculus GN=Chga PE=1 SV=1	Chga	1.265	0.300732
Ganglioside-induced differentiation-associated protein 1-like 1 OS=Mus musculus GN=Gdap1l1 PE=1 SV=1	Gdap1l1	1.175	0.301649
Ribulose-phosphate 3-epimerase OS=Mus musculus GN=Rpe PE=1 SV=1	Rpe	1.267	0.302701
ATP synthase subunit beta, mitochondrial OS=Mus musculus GN=Atp5b PE=1 SV=2	Atp5f1b	1.184	0.308648
Protein ERGIC-53 OS=Mus musculus GN=Lman1 PE=1 SV=1	Lman1	1.177	0.308648
Ectonucleoside triphosphate diphosphohydrolase 2 OS=Mus musculus GN=Entpd2 PE=1 SV=2	Entpd2	1.242	0.309599
Vacuolar protein sorting-associated protein 41 homolog OS=Mus musculus GN=Vps41 PE=1 SV=1	Vps41	0.933	0.313588
L-seryl-tRNA(Sec) kinase OS=Mus musculus GN=Pstk PE=1 SV=2	Pstk	1.343	0.318626
MCG4620, isoform CRA_b OS=Mus musculus GN=Mcc PE=1 SV=1	Mcc	0.857	0.321599
Dystonin OS=Mus musculus GN=Dst PE=1 SV=2	Dst	1.194	0.321703
RIKEN cDNA 9330182L06 gene OS=Mus musculus GN=9330182L06Rik PE=1 SV=1	Elapor2	1.291	0.322733
Neutral amino acid transporter A OS=Mus musculus GN=Slc1a4 PE=1 SV=1	Slc1a4	1.183	0.324605
Tropomyosin 1, alpha, isoform CRA_j OS=Mus musculus GN=Tpm1 PE=1 SV=1	Tpm1	0.927	0.325239
Cadherin-5 OS=Mus musculus GN=Cdh5 PE=1 SV=2	Cdh5	1.261	0.327929
Keratin, type I cuticular Ha5 OS=Mus musculus GN=Krt35 PE=1 SV=1	Krt35	0.898	0.32919
Nucleoporin NDC1 OS=Mus musculus GN=Ndc1 PE=1 SV=1	Ndc1	0.902	0.329512
B-cell receptor-associated protein 29 OS=Mus musculus GN=Bcap29 PE=1 SV=1	Bcap29	1.168	0.331245
CDP-diacylglycerol--inositol 3-phosphatidyltransferase OS=Mus musculus GN=Cdipt PE=1 SV=1	Cdipt	0.929	0.331291
Retinol dehydrogenase 11 OS=Mus musculus GN=Rdh11 PE=1 SV=1	Rdh11	0.923	0.333807
H(+)/Cl(-) exchange transporter 7 OS=Mus musculus GN=Clcn7 PE=1 SV=1	Clcn7	1.278	0.336199
Probable ATP-dependent RNA helicase YTHDC2 OS=Mus musculus GN=Ythdc2 PE=1 SV=1	Ythdc2	0.931	0.33649
Spondin-1 OS=Mus musculus GN=Spon1 PE=1 SV=1	Spon1	1.201	0.336608
Zinc finger protein 960 OS=Mus musculus GN=Zfp960 PE=4 SV=1	Zfp960	1.195	0.336608
Transporter OS=Mus musculus GN=Slc6a5 PE=1 SV=1	Slc6a5	1.168	0.336608
BCL2/adenovirus E1B 19 kDa protein-interacting protein 3-like OS=Mus musculus GN=Bnip3l PE=1 SV=1	Bnip3l	0.918	0.336608
Histone deacetylase 6 OS=Mus musculus GN=Hdac6 PE=1 SV=3	Hdac6	1.196	0.3377
4-aminobutyrate aminotransferase, mitochondrial OS=Mus musculus GN=Abat PE=1 SV=1	Abat	1.18	0.3377
Selenoprotein N OS=Mus musculus GN=Selenon PE=3 SV=2	Selenon	0.854	0.33897
Magnesium transporter MRS2 homolog, mitochondrial OS=Mus musculus GN=Mrs2 PE=2 SV=2	Mrs2	1.162	0.339129
Protein S100-A6 OS=Mus musculus GN=S100a6 PE=1 SV=3	S100a6	1.17	0.340327
Dystroglycan OS=Mus musculus GN=Dag1 PE=1 SV=4	Dag1	1.183	0.343596
Acp1 protein OS=Mus musculus GN=Acp1 PE=1 SV=1	Acp1	1.181	0.343596
tRNA pseudouridine synthase-like 1 OS=Mus musculus GN=Pusl1 PE=1 SV=1	Pusl1	1.256	0.346058
ATP-binding cassette sub-family A member 1 OS=Mus musculus GN=Abca1 PE=1 SV=4	Abca1	1.32	0.350171
Gap junction beta-2 protein OS=Mus musculus GN=Gjb2 PE=1 SV=1	Gjb2	0.907	0.350171
Cilia- and flagella-associated protein 36 OS=Mus musculus GN=Cfap36 PE=1 SV=1	Cfap36	1.279	0.350892
Probable E3 ubiquitin-protein ligase MID2 OS=Mus musculus GN=Mid2 PE=1 SV=1	Mid2	1.295	0.351111
39S ribosomal protein L54, mitochondrial OS=Mus musculus GN=Mrpl54 PE=1 SV=1	Mrpl54	1.174	0.351111
ATP synthase protein 8 OS=Mus musculus GN=Mtatp8 PE=1 SV=1	Mtatp8	1.16	0.351111
Titin OS=Mus musculus GN=Ttn PE=1 SV=1	Ttn	0.927	0.351111
Proline-serine-threonine phosphatase-interacting protein 1 OS=Mus musculus GN=Pstpip1 PE=1 SV=1	Pstpip1	0.771	0.351111
Plectin (Fragment) OS=Mus musculus GN=Plec PE=1 SV=1	Plec	1.395	0.351348
Cystatin-C OS=Mus musculus GN=Cst3 PE=1 SV=2	Cst3	0.949	0.351695
Serine/threonine-protein phosphatase with EF-hands 1 OS=Mus musculus GN=Ppef1 PE=2 SV=2	Ppef1	1.277	0.352893
Thioredoxin, mitochondrial (Fragment) OS=Mus musculus GN=Txn2 PE=1 SV=1	Txn2	1.268	0.352893
Gap junction gamma-3 protein OS=Mus musculus GN=Gjc3 PE=1 SV=2	Gjc3	1.18	0.352893
ATP synthase F(0) complex subunit C1, mitochondrial OS=Mus musculus GN=Atp5g1 PE=2 SV=1	Atp5mc1	1.178	0.352893
Required for meiotic nuclear division protein 1 homolog OS=Mus musculus GN=Rmnd1 PE=1 SV=1	Rmnd1	1.167	0.352893
Mitochondrial import inner membrane translocase subunit Tim10 OS=Mus musculus GN=Timm10 PE=1 SV=1	Timm10	1.167	0.352893
Sarcoplasmic/endoplasmic reticulum calcium ATPase 1 OS=Mus musculus GN=Atp2a1 PE=1 SV=1	Atp2a1	0.948	0.352893
Bardet-Biedl syndrome 5 protein homolog OS=Mus musculus GN=Bbs5 PE=1 SV=1	Bbs5	0.902	0.352893
Glucose-fructose oxidoreductase domain-containing protein 1 OS=Mus musculus GN=Gfod1 PE=1 SV=1	Gfod1	0.891	0.352893
Keratin, type I microfibrillar, 47.6 kDa OS=Ovis aries PE=3 SV=2		0.883	0.352893
Mitochondrial ornithine transporter 1 OS=Mus musculus GN=Slc25a15 PE=1 SV=1	Slc25a15	1.332	0.354955
Tyrosine-protein kinase OS=Mus musculus GN=Jak2 PE=1 SV=1	Jak2	1.242	0.355697
Ubiquinol-cytochrome-c reductase complex assembly factor 2 OS=Mus musculus GN=Uqcc2 PE=1 SV=1	Uqcc2	1.201	0.355697
DnaJ homolog subfamily C member 11 OS=Mus musculus GN=Dnajc11 PE=1 SV=2	Dnajc11	1.172	0.355697
E3 ubiquitin-protein ligase CBL OS=Mus musculus GN=Cbl PE=1 SV=3	Cbl	0.783	0.355697
Histone H1.3 OS=Mus musculus GN=Hist1h1d PE=1 SV=2	H1-3	0.915	0.35907
ATP-binding cassette sub-family F member 3 OS=Mus musculus GN=Abcf3 PE=1 SV=1	Abcf3	1.166	0.360429
Paraplegin OS=Mus musculus GN=Spg7 PE=1 SV=1	Spg7	1.259	0.361251
Calcium uniporter protein, mitochondrial OS=Mus musculus GN=Mcu PE=1 SV=2	Mcu	1.177	0.361251
Ly6g6e protein, isoform A OS=Mus musculus GN=Ly6g6e PE=1 SV=1		0.92	0.365109
General transcription factor IIE subunit 1 OS=Mus musculus GN=Gtf2e1 PE=1 SV=1	Gtf2e1	1.247	0.366309
Cleavage and polyadenylation specific factor 4 isoform 1 OS=Mus musculus GN=Cpsf4 PE=1 SV=1	Cpsf4	1.248	0.367022
Malate dehydrogenase, mitochondrial OS=Mus musculus GN=Mdh2 PE=1 SV=3	Mdh2	1.176	0.371314
THUMP domain-containing protein 3 OS=Mus musculus GN=Thumpd3 PE=1 SV=1	Thumpd3	0.916	0.371314
Ectonucleotide pyrophosphatase/phosphodiesterase family member 6 OS=Mus musculus GN=Enpp6 PE=1 SV=1	Enpp6	1.175	0.372676
Proteasome assembly chaperone 1 OS=Mus musculus GN=Psmg1 PE=1 SV=1	Psmg1	0.783	0.372676
39S ribosomal protein L38, mitochondrial OS=Mus musculus GN=Mrpl38 PE=1 SV=2	Mrpl38	1.199	0.375416
RNA-binding protein 12B-A OS=Mus musculus GN=Rbm12b1 PE=1 SV=2	Rbm12b1	0.887	0.375416
Transmembrane protein 88B OS=Mus musculus GN=Tmem88b PE=1 SV=2	Tmem88b	0.853	0.375416
NADH dehydrogenase [ubiquinone] flavoprotein 3, mitochondrial OS=Mus musculus GN=Ndufv3 PE=1 SV=1	Ndufv3	1.183	0.379287
Signal recognition particle 14 kDa protein OS=Mus musculus GN=Srp14 PE=1 SV=1	Srp14	0.949	0.379731
28S ribosomal protein S31, mitochondrial OS=Mus musculus GN=Mrps31 PE=1 SV=1	Mrps31	1.164	0.381422
Proteasome subunit beta type-8 OS=Mus musculus GN=Psmb8 PE=1 SV=2	Psmb8	1.286	0.381561
Butyrophilin, subfamily 3, member A3 OS=Mus musculus GN=Btnl4 PE=4 SV=1	Btnl4	1.439	0.383217
2,4-dienoyl-CoA reductase, mitochondrial OS=Mus musculus GN=Decr1 PE=1 SV=1	Decr1	1.163	0.383217
Zinc finger protein 740 OS=Mus musculus GN=Zfp740 PE=1 SV=1		0.897	0.383217
Protein phosphatase Slingshot homolog 1 OS=Mus musculus GN=Ssh1 PE=1 SV=1	Ssh1	0.81	0.383217
Delta-sarcoglycan OS=Mus musculus GN=Sgcd PE=1 SV=1	Sgcd	1.224	0.38365
Peptidyl-prolyl cis-trans isomerase FKBP3 OS=Mus musculus GN=Fkbp3 PE=1 SV=2	Fkbp3	1.154	0.383926
General transcription factor IIIC, polypeptide 3 OS=Mus musculus GN=Gtf3c3 PE=1 SV=1	Gtf3c3	1.242	0.388542
Sjoegren syndrome/scleroderma autoantigen 1 homolog OS=Mus musculus GN=Sssca1 PE=1 SV=1	Znrd2	1.26	0.388895
2-amino-3-ketobutyrate coenzyme A ligase, mitochondrial OS=Mus musculus GN=Gcat PE=1 SV=2	Gcat	1.249	0.389231
Methylmalonyl-CoA mutase, mitochondrial OS=Mus musculus GN=Mut PE=1 SV=2	Mmut	1.195	0.389271
Small ubiquitin-related modifier 1 OS=Mus musculus GN=Sumo1 PE=1 SV=1	Sumo1	1.182	0.391431
rRNA methyltransferase 3, mitochondrial OS=Mus musculus GN=Mrm3 PE=2 SV=1	Mrm3	1.245	0.391436
Transcription factor SOX-14 OS=Mus musculus GN=Sox14 PE=2 SV=2	Sox14	0.933	0.393203
Short coiled-coil protein OS=Mus musculus GN=Scoc PE=1 SV=1	Scoc	0.813	0.394687
Ectonucleotide pyrophosphatase/phosphodiesterase family member 5 OS=Mus musculus GN=Enpp5 PE=1 SV=3	Enpp5	0.927	0.395624
Cytochrome c oxidase assembly factor 6 homolog OS=Mus musculus GN=Coa6 PE=1 SV=1	Coa6	1.402	0.39684
Sestrin-3 OS=Mus musculus GN=Sesn3 PE=1 SV=1	Sesn3	0.898	0.39684
Protein AMBP OS=Mus musculus GN=Ambp PE=1 SV=2	Ambp	1.235	0.397327
Breakpoint cluster region protein OS=Mus musculus GN=Bcr PE=1 SV=3	Bcr	0.933	0.397913
Pumilio homolog 3 OS=Mus musculus GN=Pum3 PE=1 SV=1	Pum3	1.242	0.398766
Coiled-coil domain-containing protein 50 (Fragment) OS=Mus musculus GN=Ccdc50 PE=1 SV=1	Ccdc50	0.863	0.398766
G-protein coupled receptor family C group 5 member B OS=Mus musculus GN=Gprc5b PE=1 SV=1	Gprc5b	1.193	0.401316
Short/branched chain specific acyl-CoA dehydrogenase, mitochondrial OS=Mus musculus GN=Acadsb PE=1 SV=1	Acadsb	1.189	0.40186
Poly [ADP-ribose] polymerase OS=Mus musculus GN=Parp4 PE=1 SV=1	Parp4	1.397	0.402436
ATPase inhibitor, mitochondrial OS=Mus musculus GN=Atpif1 PE=1 SV=1	Atpif1	1.186	0.402436
DNA segment, Chr 2, Brigham & Women's Genetics 1423-expressed OS=Mus musculus GN=D2Bwg1423e PE=4 SV=1	Brd3os	1.185	0.402436
NADH dehydrogenase [ubiquinone] iron-sulfur protein 4, mitochondrial OS=Mus musculus GN=Ndufs4 PE=1 SV=3	Ndufs4	1.176	0.402436
Methylmalonate-semialdehyde dehydrogenase [acylating], mitochondrial OS=Mus musculus GN=Aldh6a1 PE=1 SV=1	Aldh6a1	1.166	0.402436
Cytochrome c oxidase subunit 4 isoform 1, mitochondrial (Fragment) OS=Mus musculus GN=Cox4i1 PE=1 SV=1	Cox4i1	1.165	0.402436
Metaxin 3 OS=Mus musculus GN=Mtx3 PE=1 SV=2	Mtx3	1.16	0.402436
TBC1 domain family member 10A OS=Mus musculus GN=Tbc1d10a PE=1 SV=1	Tbc1d10a	0.95	0.402436
Zinc finger CCCH type-containing 7B OS=Mus musculus GN=Zc3h7b PE=1 SV=1	Zc3h7b	0.946	0.402436
CLIP-associating protein 2 OS=Mus musculus GN=Clasp2 PE=1 SV=1	Clasp2	0.899	0.402436
Helicase-like transcription factor OS=Mus musculus GN=Hltf PE=1 SV=1	Hltf	0.815	0.402436
Glutamate--cysteine ligase regulatory subunit OS=Mus musculus GN=Gclm PE=1 SV=1	Gclm	0.953	0.402538
Sonic hedgehog protein OS=Mus musculus GN=Shh PE=1 SV=2	Shh	1.176	0.406277
Dynactin subunit 5 OS=Mus musculus GN=Dctn5 PE=1 SV=1	Dctn5	0.95	0.406277
Acid-sensing ion channel 1 OS=Mus musculus GN=Asic1 PE=1 SV=1	Asic1	1.256	0.407897
AT-rich interactive domain-containing protein 3C (Fragment) OS=Mus musculus GN=Arid3c PE=4 SV=1		1.176	0.408102
D17H6S56E-3 protein OS=Mus musculus GN=Vwa7 PE=2 SV=1	Vwa7	1.154	0.408102
Zinc finger and SCAN domain-containing protein 12 OS=Mus musculus GN=Zscan12 PE=2 SV=2	Zscan12	0.917	0.408102
IgE-binding protein OS=Mus musculus GN=Iap PE=2 SV=1	Iap	0.951	0.408953
PC4 and SFRS1-interacting protein OS=Mus musculus GN=Psip1 PE=1 SV=1	Psip1	1.397	0.41046
Pyrroline-5-carboxylate reductase 2 OS=Mus musculus GN=Pycr2 PE=1 SV=1	Pycr2	1.158	0.41046
Flotillin 2, isoform CRA_a OS=Mus musculus GN=Flot2 PE=1 SV=1	Flot2	1.243	0.411776
RNA polymerase-associated protein RTF1 homolog OS=Mus musculus GN=Rtf1 PE=1 SV=1	Rtf1	0.905	0.411776
InaD-like protein OS=Mus musculus GN=Patj PE=1 SV=2	Patj	1.241	0.413028
Histone deacetylase OS=Mus musculus GN=Gm10093 PE=3 SV=1		0.943	0.413854
Fas apoptotic inhibitory molecule 1 (Fragment) OS=Mus musculus GN=Faim PE=1 SV=6	Faim	0.901	0.413854
WASH complex subunit 1 OS=Mus musculus GN=Washc1 PE=1 SV=1	Washc1	0.933	0.414198
Phospholipid phosphatase 3 OS=Mus musculus GN=Plpp3 PE=1 SV=1	Plpp3	1.157	0.414265
Dual specificity mitogen-activated protein kinase kinase 7 OS=Mus musculus GN=Map2k7 PE=1 SV=1	Map2k7	0.924	0.414474
Ras-related protein Rab-9B OS=Mus musculus GN=Rab9b PE=1 SV=1	Rab9b	1.194	0.414835
Heat shock 70 kDa protein 14 OS=Mus musculus GN=Hspa14 PE=1 SV=2	Hspa14	1.242	0.415844
Epsin-3 OS=Mus musculus GN=Epn3 PE=1 SV=1	Epn3	0.861	0.417426
Gamma-glutamyltranspeptidase 1 (Fragment) OS=Mus musculus GN=Ggt1 PE=1 SV=1	Ggt1	1.189	0.418933
Protocadherin gamma-A4 OS=Mus musculus GN=Pcdhga4 PE=1 SV=1	Pcdhga4	1.17	0.418933
Ubiquitin carboxyl-terminal hydrolase 24 OS=Mus musculus GN=Usp24 PE=1 SV=1	Usp24	0.908	0.418933
Transducin beta-like protein 3 (Fragment) OS=Mus musculus GN=Tbl3 PE=1 SV=1	Tbl3	0.897	0.418933
Glutamate dehydrogenase 1, mitochondrial OS=Mus musculus GN=Glud1 PE=1 SV=1	Glud1	1.169	0.419256
Chromatin target of PRMT1 protein OS=Mus musculus GN=Chtop PE=1 SV=1	Chtop	0.923	0.419256
Synaptopodin-2 OS=Mus musculus GN=Synpo2 PE=1 SV=1	Synpo2	0.919	0.419256
Acid-sensing ion channel 2 OS=Mus musculus GN=Asic2 PE=1 SV=1	Asic2	0.83	0.419265
ATP synthase subunit alpha, mitochondrial OS=Mus musculus GN=Atp5a1 PE=1 SV=1	Atp5f1a	1.168	0.421867
60S ribosomal protein L7-like 1 OS=Mus musculus GN=Rpl7l1 PE=1 SV=1	Rpl7l1	1.202	0.422294
Synovial sarcoma, X member B9 OS=Mus musculus GN=Ssxb9 PE=4 SV=1	Ssxb9	0.951	0.422581
40S ribosomal protein S23 OS=Mus musculus GN=Rps23 PE=1 SV=3	Rps23	0.925	0.423298
Histone-binding protein RBBP7 OS=Mus musculus GN=Rbbp7 PE=1 SV=1	Rbbp7	0.929	0.424266
Mitochondrial import receptor subunit TOM5 homolog OS=Mus musculus GN=Tomm5 PE=3 SV=1	Tomm5	1.155	0.424402
Secretogranin-2 OS=Mus musculus GN=Scg2 PE=1 SV=1	Scg2	1.169	0.425129
Collagen alpha-1(III) chain OS=Mus musculus GN=Col3a1 PE=1 SV=4	Col3a1	1.27	0.425171
Synaptophysin-like protein 1 OS=Mus musculus GN=Sypl1 PE=1 SV=2	Sypl1	0.939	0.425171
GATS-like protein 2 OS=Mus musculus GN=Gatsl2 PE=1 SV=1	Castor2	0.897	0.427366
Succinate dehydrogenase cytochrome b560 subunit, mitochondrial OS=Mus musculus GN=Sdhc PE=1 SV=1	Sdhc	1.16	0.430901
4F2 cell-surface antigen heavy chain OS=Mus musculus GN=Slc3a2 PE=1 SV=1	Slc3a2	1.167	0.43119
Acyl-CoA synthetase family member 2, mitochondrial OS=Mus musculus GN=Acsf2 PE=1 SV=1	Acsf2	1.147	0.43119
Ectonucleoside triphosphate diphosphohydrolase 5 OS=Mus musculus GN=Entpd5 PE=1 SV=1	Entpd5	0.888	0.435159
Protein phosphatase 1 regulatory subunit 12B OS=Mus musculus GN=Ppp1r12b PE=1 SV=2	Ppp1r12b	0.945	0.437462
Junctional protein associated with coronary artery disease OS=Mus musculus GN=Jcad PE=1 SV=2	Jcad	1.222	0.438003
Ras-related C3 botulinum toxin substrate 3 OS=Mus musculus GN=Rac3 PE=1 SV=1	Rac3	0.885	0.439036
Gap junction gamma-2 protein OS=Mus musculus GN=Gjc2 PE=1 SV=2	Gjc2	0.954	0.440801
Myelin-associated oligodendrocyte basic protein OS=Mus musculus GN=Mobp PE=1 SV=1	Mobp	0.923	0.440801
Coatomer subunit gamma-2 OS=Mus musculus GN=Copg2 PE=1 SV=1	Copg2	1.374	0.442269
Anion exchange protein OS=Mus musculus GN=Slc4a7 PE=1 SV=1	Slc4a7	1.427	0.44357
Probable ubiquitin carboxyl-terminal hydrolase FAF-X (Fragment) OS=Mus musculus GN=Usp9x PE=1 SV=1	Usp9x	0.9	0.44592
Lysosomal alpha-glucosidase OS=Mus musculus GN=Gaa PE=1 SV=2	Gaa	1.179	0.44916
Helicase POLQ-like (Fragment) OS=Mus musculus GN=Helq PE=1 SV=1	Helq	1.167	0.449499
Mitochondrial-processing peptidase subunit alpha OS=Mus musculus GN=Pmpca PE=1 SV=1	Pmpca	1.157	0.449499
Mitochondrial chaperone BCS1 OS=Mus musculus GN=Bcs1l PE=1 SV=1	Bcs1l	0.923	0.454828
Calcium-binding mitochondrial carrier protein SCaMC-2 (Fragment) OS=Mus musculus GN=Slc25a25 PE=1 SV=1	Slc25a25	1.196	0.457138
Proenkephalin-A OS=Mus musculus GN=Penk PE=1 SV=2	Penk	1.157	0.457138
5'-AMP-activated protein kinase subunit beta-1 OS=Mus musculus GN=Prkab1 PE=1 SV=2	Prkab1	1.235	0.45889
RNA-binding protein 28 OS=Mus musculus GN=Rbm28 PE=1 SV=4	Rbm28	0.913	0.458988
Proteasome subunit beta type-3 OS=Mus musculus GN=Psmb3 PE=1 SV=1	Psmb3	0.959	0.461325
Serine/threonine-protein kinase BRSK1 OS=Mus musculus GN=Brsk1 PE=1 SV=1	Brsk1	0.946	0.462285
ER membrane protein complex subunit 4 OS=Mus musculus GN=Emc4 PE=1 SV=1	Emc4	1.155	0.462549
Transportin-2 OS=Mus musculus GN=Tnpo2 PE=1 SV=1	Tnpo2	0.94	0.462549
Sphingomyelin phosphodiesterase 3 OS=Mus musculus GN=Smpd3 PE=1 SV=1	Smpd3	1.283	0.464378
Transmembrane protein 50B OS=Mus musculus GN=Tmem50b PE=1 SV=1	Tmem50b	1.169	0.464378
Transformer-2 protein homolog alpha OS=Mus musculus GN=Tra2a PE=1 SV=1	Tra2a	0.93	0.464378
Sentrin-specific protease 3 (Fragment) OS=Mus musculus GN=Senp3 PE=1 SV=1	Senp3	0.898	0.464378
Brain-enriched guanylate kinase-associated protein OS=Mus musculus GN=Begain PE=1 SV=1	Begain	0.917	0.466693
Cell cycle and apoptosis regulator protein 2 OS=Mus musculus GN=Ccar2 PE=1 SV=2	Ccar2	1.175	0.467645
CCAAT/enhancer-binding protein zeta OS=Mus musculus GN=Cebpz PE=1 SV=2	Cebpz	0.875	0.469384
Glutamate carboxypeptidase 2 OS=Mus musculus GN=Folh1 PE=1 SV=2	Folh1	1.21	0.469398
Aquaporin-1 OS=Mus musculus GN=Aqp1 PE=1 SV=3	Aqp1	1.156	0.469398
Centrosomal protein of 95 kDa OS=Mus musculus GN=Cep95 PE=1 SV=2	Cep95	0.912	0.470266
Nucleoside diphosphate kinase homolog 5 OS=Mus musculus GN=Nme5 PE=1 SV=2	Nme5	1.147	0.472241
Transmembrane and coiled-coil domains protein 3 OS=Mus musculus GN=Tmcc3 PE=1 SV=2	Tmcc3	0.955	0.472241
Dedicator of cytokinesis protein 2 OS=Mus musculus GN=Dock2 PE=1 SV=3	Dock2	0.902	0.472241
Succinate--CoA ligase [ADP/GDP-forming] subunit alpha, mitochondrial OS=Mus musculus GN=Suclg1 PE=1 SV=4	Suclg1	1.157	0.474149
Myelin basic protein OS=Mus musculus GN=Mbp PE=1 SV=2	Mbp	1.161	0.476164
Thiosulfate sulfurtransferase OS=Mus musculus GN=Tst PE=1 SV=3	Tst	1.153	0.476164
Antigen peptide transporter 1 (Fragment) OS=Mus musculus GN=Tap1 PE=1 SV=1	Tap1	0.905	0.476164
Eukaryotic translation initiation factor 3 subunit J-B OS=Mus musculus GN=Eif3j2 PE=1 SV=1	Eif3j2	1.166	0.478281
Complement C1q subcomponent subunit A OS=Mus musculus GN=C1qa PE=1 SV=2	C1qa	0.939	0.478281
M-phase inducer phosphatase 1 OS=Mus musculus GN=Cdc25a PE=2 SV=2	Cdc25a	1.331	0.478963
Ubiquitin-conjugating enzyme E2 K OS=Mus musculus GN=Ube2k PE=1 SV=3	Ube2k	1.163	0.479539
Voltage-dependent anion-selective channel protein 3 OS=Mus musculus GN=Vdac3 PE=1 SV=1	Vdac3	1.162	0.479539
G-protein-signaling modulator 1 OS=Mus musculus GN=Gpsm1 PE=1 SV=3	Gpsm1	0.954	0.479539
Arf-GAP with Rho-GAP domain, ANK repeat and PH domain-containing protein 2 OS=Mus musculus GN=Arap2 PE=1 SV=1	Arap2	1.21	0.479681
NEDD8 ultimate buster 1 OS=Mus musculus GN=Nub1 PE=1 SV=2	Nub1	1.227	0.480201
Semaphorin-7A OS=Mus musculus GN=Sema7a PE=1 SV=1	Sema7a	0.935	0.480201
Anaphase-promoting complex subunit 1 OS=Mus musculus GN=Anapc1 PE=1 SV=2	Anapc1	0.953	0.480235
Aryl hydrocarbon receptor nuclear translocator-like protein 1 OS=Mus musculus GN=Arntl PE=1 SV=1	Arntl	1.355	0.481511
Synaptophysin OS=Mus musculus GN=Syp PE=1 SV=2	Syp	1.153	0.48719
Tuftelin-interacting protein 11 OS=Mus musculus GN=Tfip11 PE=1 SV=1	Tfip11	1.208	0.490534
Phospholipid phosphatase 4 OS=Mus musculus GN=Plpp4 PE=2 SV=1	Plpp4	1.226	0.490899
Uridine-cytidine kinase-like 1 OS=Mus musculus GN=Uckl1 PE=1 SV=1	Uckl1	1.223	0.490899
Coiled-coil-helix-coiled-coil-helix domain-containing protein 7 (Fragment) OS=Mus musculus GN=Chchd7 PE=1 SV=1	Chchd7	1.171	0.490899
Cytochrome c oxidase subunit NDUFA4 OS=Mus musculus GN=Ndufa4 PE=1 SV=2	Ndufa4	1.161	0.490899
Integrin alpha-6 (Fragment) OS=Mus musculus GN=Itga6 PE=1 SV=1	Itga6	1.179	0.491122
Podocalyxin OS=Mus musculus GN=Podxl PE=1 SV=2	Podxl	0.905	0.491122
Adaptin ear-binding coat-associated protein 1 OS=Mus musculus GN=Necap1 PE=1 SV=2	Necap1	1.165	0.493936
Zinc finger protein 608 OS=Mus musculus GN=Znf608 PE=1 SV=1	Znf608	1.24	0.494074
Synaptic vesicle glycoprotein 2B OS=Mus musculus GN=Sv2b PE=1 SV=1	Sv2b	1.155	0.497288
Vacuolar protein sorting-associated protein 37C OS=Mus musculus GN=Vps37c PE=1 SV=1	Vps37c	0.925	0.497288
Poly [ADP-ribose] polymerase 12 OS=Mus musculus GN=Parp12 PE=1 SV=3	Parp12	0.911	0.497288
Phosphatidylinositol 3,4,5-trisphosphate-dependent Rac exchanger 1 protein OS=Mus musculus GN=Prex1 PE=1 SV=2	Prex1	0.916	0.497442
Hepatoma-derived growth factor-related protein 3 OS=Mus musculus GN=Hdgfrp3 PE=1 SV=2	Hdgfl3	1.168	0.497824
Ubiquinol-cytochrome-c reductase complex assembly factor 1 OS=Mus musculus GN=Uqcc1 PE=1 SV=1	Uqcc1	1.153	0.497824
Mitochondrial import inner membrane translocase subunit TIM44 OS=Mus musculus GN=Timm44 PE=1 SV=2	Timm44	1.154	0.498452
Ubiquitin-60S ribosomal protein L40 OS=Mus musculus GN=Uba52 PE=1 SV=2	Uba52	0.954	0.499087
Ubiquitin carboxyl-terminal hydrolase 19 OS=Mus musculus GN=Usp19 PE=1 SV=1	Usp19	0.941	0.499087
Ubiquitin carboxyl-terminal hydrolase 8 OS=Mus musculus GN=Usp8 PE=1 SV=1	Usp8	0.939	0.499087
Pyruvate dehydrogenase E1 component subunit beta, mitochondrial OS=Mus musculus GN=Pdhb PE=1 SV=1	Pdhb	1.16	0.502389
Aquaporin-7 OS=Mus musculus GN=Aqp7 PE=1 SV=1	Aqp7	1.399	0.503653
Glutathione S-transferase mu 4 OS=Mus musculus GN=Gstm4 PE=1 SV=1	Gstm4	1.311	0.503653
Synaptotagmin-5 OS=Mus musculus GN=Syt5 PE=1 SV=1	Syt5	1.24	0.503653
Blood group Rh(D) polypeptide OS=Mus musculus GN=Rhd PE=1 SV=1	Rhd	1.238	0.503653
Formin-binding protein 1-like OS=Mus musculus GN=Fnbp1l PE=1 SV=1	Fnbp1l	1.225	0.503653
Guanine nucleotide exchange factor DBS OS=Mus musculus GN=Mcf2l PE=1 SV=1	Mcf2l	1.224	0.503653
Coagulation factor XIII A chain OS=Mus musculus GN=F13a1 PE=1 SV=3	F13a1	1.222	0.503653
Pituitary homeobox 2 OS=Mus musculus GN=Pitx2 PE=1 SV=2	Pitx2	1.191	0.503653
5-demethoxyubiquinone hydroxylase, mitochondrial OS=Mus musculus GN=Coq7 PE=1 SV=1	Coq7	1.173	0.503653
Nodal modulator 1 OS=Mus musculus GN=Nomo1 PE=1 SV=1	Nomo1	1.166	0.503653
MCG116562, isoform CRA_a OS=Mus musculus GN=Vcan PE=1 SV=1	Vcan	1.159	0.503653
MICOS complex subunit Mic19 OS=Mus musculus GN=Chchd3 PE=1 SV=1	Chchd3	1.159	0.503653
ATP synthase subunit gamma OS=Mus musculus GN=Atp5c1 PE=1 SV=1	Atp5c1	1.159	0.503653
MutS protein homolog 5 OS=Mus musculus GN=Msh5 PE=4 SV=1	Msh5	1.157	0.503653
Kallikrein 6, isoform CRA_a OS=Mus musculus GN=Klk6 PE=1 SV=1	Klk6	0.961	0.503653
Myelin proteolipid protein OS=Mus musculus GN=Plp1 PE=1 SV=2	Plp1	0.929	0.503653
Inactive ubiquitin carboxyl-terminal hydrolase 54 (Fragment) OS=Mus musculus GN=Usp54 PE=1 SV=8	Usp54	0.908	0.503653
GTPase-activating Rap/Ran-GAP domain-like protein 3 (Fragment) OS=Mus musculus GN=Garnl3 PE=1 SV=1	Garnl3	0.865	0.503653
Caytaxin OS=Mus musculus GN=Atcay PE=1 SV=1	Atcay	0.96	0.503807
Mitochondrial-processing peptidase subunit beta OS=Mus musculus GN=Pmpcb PE=1 SV=1	Pmpcb	1.165	0.504758
Putative uncharacterized protein OS=Mus musculus GN=Gm5591 PE=2 SV=1	Gm5591	0.932	0.504758
Immunoglobulin kappa variable 5-39 OS=Mus musculus GN=Igkv5-39 PE=1 SV=7	Igkv5-39	1.221	0.505711
Pleckstrin homology domain-containing, family G (with RhoGef domain) member 4 OS=Mus musculus GN=Plekhg4 PE=1 SV=1	Plekhg4	1.221	0.505711
Protein stum homolog OS=Mus musculus GN=Stum PE=1 SV=1	Stum	1.187	0.505711
Transgelin OS=Mus musculus GN=Tagln PE=1 SV=3	Tagln	1.162	0.505711
Transgelin-3 OS=Mus musculus GN=Tagln3 PE=1 SV=1	Tagln3	1.158	0.505711
Isocitrate dehydrogenase [NAD] subunit, mitochondrial OS=Mus musculus GN=Idh3a PE=1 SV=1	Idh3a	1.158	0.505711
Glutathione reductase, mitochondrial OS=Mus musculus GN=Gsr PE=1 SV=3	Gsr	1.153	0.505711
CAP-Gly domain-containing linker protein 1 OS=Mus musculus GN=Clip1 PE=1 SV=1	Clip1	0.88	0.505711
RNA-binding protein 42 OS=Mus musculus GN=Rbm42 PE=1 SV=1		0.858	0.505711
ADP-ribosylation factor 2 OS=Mus musculus GN=Arf2 PE=1 SV=2	Arf2	1.236	0.507636
Cob(I)yrinic acid a,c-diamide adenosyltransferase, mitochondrial OS=Mus musculus GN=Mmab PE=1 SV=1	Mmab	1.202	0.507636
Succinyl-CoA:3-ketoacid coenzyme A transferase 1, mitochondrial OS=Mus musculus GN=Oxct1 PE=1 SV=1	Oxct1	1.157	0.507636
Succinate dehydrogenase [ubiquinone] iron-sulfur subunit, mitochondrial OS=Mus musculus GN=Sdhb PE=1 SV=1	Sdhb	1.157	0.507636
LETM1 and EF-hand domain-containing protein 1, mitochondrial OS=Mus musculus GN=Letm1 PE=1 SV=1	Letm1	1.155	0.507636
Glutathione S-transferase A4 OS=Mus musculus GN=Gsta4 PE=1 SV=3	Gsta4	1.154	0.507636
Low molecular weight phosphotyrosine protein phosphatase OS=Mus musculus GN=Acp1 PE=1 SV=3	Acp1	1.153	0.507636
Carbonic anhydrase 14 OS=Mus musculus GN=Ca14 PE=1 SV=1	Ca14	1.152	0.507636
Lactation elevated protein 1 OS=Mus musculus GN=Lace1 PE=1 SV=1	Afg1l	1.151	0.507636
Serrate RNA effector molecule homolog OS=Mus musculus GN=Srrt PE=1 SV=1	Srrt	1.145	0.507636
Microtubule-associated protein OS=Mus musculus GN=Map4 PE=1 SV=1	Map4	1.135	0.507636
Tubulin beta-6 chain OS=Mus musculus GN=Tubb6 PE=1 SV=1	Tubb6	0.962	0.507636
Protein arginine N-methyltransferase 3 OS=Mus musculus GN=Prmt3 PE=1 SV=2		0.929	0.507636
Podocalyxin-like protein 2 OS=Mus musculus GN=Podxl2 PE=1 SV=2	Podxl2	0.821	0.507636
3-hydroxyisobutyryl-CoA hydrolase, mitochondrial OS=Mus musculus GN=Hibch PE=1 SV=1	Hibch	1.15	0.508194
Midasin AAA ATPase 1 OS=Mus musculus GN=Mdn1 PE=1 SV=1	Mdn1	0.929	0.508769
Septin-2 OS=Mus musculus GN=Sept2 PE=1 SV=1	Septin2	1.154	0.510607
N-acyl-aromatic-L-amino acid amidohydrolase (carboxylate-forming) OS=Mus musculus GN=Acy3 PE=1 SV=1	Acy3	0.93	0.512638
ATP-binding cassette sub-family A member 5 OS=Mus musculus GN=Abca5 PE=1 SV=2	Abca5	1.182	0.516609
Enoyl-CoA hydratase, mitochondrial OS=Mus musculus GN=Echs1 PE=1 SV=1	Echs1	1.151	0.519066
Anoctamin OS=Mus musculus GN=Ano8 PE=1 SV=1	Ano8	1.359	0.519113
DmX-like protein 1 OS=Mus musculus GN=Dmxl1 PE=1 SV=1	Dmxl1	0.949	0.519575
Thiopurine S-methyltransferase OS=Mus musculus GN=Tpmt PE=1 SV=1	Tpmt	0.931	0.519575
Protein FAM196A OS=Mus musculus GN=Fam196a PE=1 SV=1	Insyn2a	1.277	0.520005
Synaptic vesicle membrane protein VAT-1 homolog-like OS=Mus musculus GN=Vat1l PE=1 SV=2	Vat1l	1.16	0.521302
Cyclin-dependent kinase 16 OS=Mus musculus GN=Cdk16 PE=1 SV=1	Cdk16	1.343	0.522337
Antithrombin-III (Fragment) OS=Mus musculus GN=Serpinc1 PE=1 SV=1	Serpinc1	1.187	0.522337
Triple QxxK/R motif-containing protein OS=Mus musculus GN=Triqk PE=2 SV=1	Triqk	1.167	0.522337
BAG family molecular chaperone regulator 2 OS=Mus musculus GN=Bag2 PE=1 SV=1	Bag2	1.14	0.522337
Vesicle transport protein USE1 OS=Mus musculus GN=Use1 PE=1 SV=1	Use1	0.913	0.522337
Plasminogen receptor (KT) OS=Mus musculus GN=Plgrkt PE=1 SV=1	Plgrkt	1.185	0.522489
60S ribosomal protein L35a OS=Mus musculus GN=Rpl35a PE=1 SV=2	Rpl35a	0.932	0.523237
Mitochondrial ribosome-associated GTPase 1 (Fragment) OS=Mus musculus GN=Mtg1 PE=1 SV=1	Mtg1	1.184	0.524256
Sodium/potassium-transporting ATPase subunit alpha OS=Mus musculus GN=Atp1a3 PE=1 SV=1	Atp1a3	1.155	0.525758
Neuropathy target esterase OS=Mus musculus GN=Pnpla6 PE=1 SV=2	Pnpla6	0.959	0.52714
Probable C-mannosyltransferase DPY19L1 OS=Mus musculus GN=Dpy19l1 PE=1 SV=1	Dpy19l1	0.95	0.52714
Ras suppressor protein 1 OS=Mus musculus GN=Rsu1 PE=1 SV=3	Rsu1	1.213	0.527574
Protein DEK OS=Mus musculus GN=Dek PE=1 SV=1	Dek	1.149	0.527574
Sorcin OS=Mus musculus GN=Sri PE=1 SV=1	Sri	1.147	0.527574
Poly [ADP-ribose] polymerase 14 OS=Mus musculus GN=Parp14 PE=1 SV=3	Parp14	1.169	0.528963
SURF1-like protein (Fragment) OS=Mus musculus GN=Surf1 PE=1 SV=1	Surf1	1.167	0.531108
Cytochrome c oxidase subunit 4 isoform 1, mitochondrial OS=Mus musculus GN=Cox4i1 PE=1 SV=2	Cox4i1	1.155	0.531108
Syntaxin-binding protein 1 OS=Mus musculus GN=Stxbp1 PE=1 SV=2	Stxbp1	1.154	0.531108
Acetyl-Coenzyme A acetyltransferase 3 OS=Mus musculus GN=Acat3 PE=1 SV=1	Acat3	0.947	0.531108
Intraflagellar transport protein 25 homolog OS=Mus musculus GN=Hspb11 PE=1 SV=2	Hspb11	1.229	0.531907
Cytochrome P450 CYP2D22 OS=Mus musculus GN=Cyp2d22 PE=1 SV=1	Cyp2d22	1.159	0.532555
Volume-regulated anion channel subunit LRRC8A OS=Mus musculus GN=Lrrc8a PE=1 SV=1	Lrrc8a	1.165	0.534454
WD repeat-containing protein 46 OS=Mus musculus GN=Wdr46 PE=2 SV=1	Wdr46	0.858	0.534905
Ubiquitin carboxyl-terminal hydrolase 20 OS=Mus musculus GN=Usp20 PE=1 SV=1	Usp20	1.162	0.536963
Serine/threonine-protein phosphatase 2A 56 kDa regulatory subunit beta isoform OS=Mus musculus GN=Ppp2r5b PE=1 SV=1	Ppp2r5b	1.157	0.536963
Transmembrane protein 201 OS=Mus musculus GN=Tmem201 PE=1 SV=1	Tmem201	1.156	0.536963
SEC16 homolog A, endoplasmic reticulum export factor OS=Mus musculus GN=Sec16a PE=1 SV=1	Sec16a	0.963	0.536963
Copine-3 OS=Mus musculus GN=Cpne3 PE=1 SV=2	Cpne3	0.948	0.536963
Cytosolic Fe-S cluster assembly factor NUBP2 OS=Mus musculus GN=Nubp2 PE=1 SV=1	Nubp2	0.933	0.536963
Alpha-1A adrenergic receptor OS=Mus musculus GN=Adra1a PE=1 SV=3	Adra1a	0.91	0.536963
2'-5'-oligoadenylate synthase-like protein 2 (Fragment) OS=Mus musculus GN=Oasl2 PE=1 SV=1	Oasl2	0.904	0.536963
Gametogenetin-binding protein 2 OS=Mus musculus GN=Ggnbp2 PE=1 SV=1	Ggnbp2	0.889	0.536963
Immunity-related GTPase family Q protein OS=Mus musculus GN=Irgq PE=1 SV=1	Irgq	1.183	0.538052
Long-chain-fatty-acid--CoA ligase 3 OS=Mus musculus GN=Acsl3 PE=1 SV=2	Acsl3	1.16	0.538218
Transgelin-2 OS=Mus musculus GN=Tagln2 PE=1 SV=4	Tagln2	1.147	0.538778
G-protein coupled receptor-associated sorting protein 2 OS=Mus musculus GN=Gprasp2 PE=1 SV=2	Gprasp2	0.961	0.538841
Alpha-actinin-4 (Fragment) OS=Mus musculus GN=Actn4 PE=1 SV=1	Actn4	0.962	0.540641
Ribosomal protein L15 OS=Mus musculus GN=Gm10020 PE=3 SV=1		0.933	0.541848
Flavin reductase (NADPH) OS=Mus musculus GN=Blvrb PE=1 SV=3	Blvrb	1.15	0.541972
Myeloperoxidase OS=Mus musculus GN=Mpo PE=1 SV=2	Mpo	1.201	0.542518
Coiled-coil domain-containing 28A OS=Mus musculus GN=Ccdc28a PE=1 SV=1	Ccdc28a	0.892	0.542518
Lamina-associated polypeptide 2, isoforms beta/delta/epsilon/gamma OS=Mus musculus GN=Tmpo PE=1 SV=4	Tmpo	1.186	0.544369
Cell division cycle and apoptosis regulator protein 1 OS=Mus musculus GN=Ccar1 PE=1 SV=1	Ccar1	0.866	0.547358
Sodium-coupled neutral amino acid transporter 3 OS=Mus musculus GN=Slc38a3 PE=1 SV=1	Slc38a3	1.142	0.548407
Unconventional myosin-Ie OS=Mus musculus GN=Myo1e PE=1 SV=1	Myo1e	0.942	0.548407
Ubiquilin-1 OS=Mus musculus GN=Ubqln1 PE=1 SV=1	Ubqln1	1.162	0.54944
Apoptosis-inducing factor 1, mitochondrial OS=Mus musculus GN=Aifm1 PE=1 SV=1	Aifm1	1.155	0.54944
Melanoma inhibitory activity protein 2 OS=Mus musculus GN=Mia2 PE=1 SV=3	Mia2	0.924	0.54944
Coiled-coil domain-containing protein 85C OS=Mus musculus GN=Ccdc85c PE=1 SV=1	Ccdc85c	1.287	0.551292
DnaJ homolog subfamily C member 10 OS=Mus musculus GN=Dnajc10 PE=1 SV=2	Dnajc10	0.965	0.5518
NADH-ubiquinone oxidoreductase chain 4L OS=Mus musculus GN=Mtnd4l PE=1 SV=2	Mtnd4l	1.292	0.558506
ER lumen protein-retaining receptor 3 OS=Mus musculus GN=Kdelr3 PE=1 SV=1	Kdelr3	1.165	0.558506
Lamin-B receptor OS=Mus musculus GN=Lbr PE=1 SV=2	Lbr	0.968	0.558506
60S ribosomal protein L13a OS=Mus musculus GN=Rpl13a PE=1 SV=4	Rpl13a	0.935	0.558506
Cytochrome c oxidase subunit 2 OS=Mus musculus GN=Mtco2 PE=1 SV=1	Mtco2	1.151	0.558594
High mobility group protein B1 OS=Mus musculus GN=Hmgb1 PE=1 SV=2	Hmgb1	1.153	0.559409
Uroporphyrinogen-III synthase (Fragment) OS=Mus musculus GN=Uros PE=1 SV=1	Uros	1.345	0.560298
Dihydrolipoyllysine-residue acetyltransferase component of pyruvate dehydrogenase complex, mitochondrial OS=Mus musculus GN=Dlat PE=1 SV=2	Dlat	1.151	0.560734
Lon protease homolog, mitochondrial OS=Mus musculus GN=Lonp1 PE=1 SV=2	Lonp1	1.148	0.560734
F-BAR domain only protein 2 OS=Mus musculus GN=Fcho2 PE=1 SV=1	Fcho2	0.931	0.560734
MICOS complex subunit Mic60 OS=Mus musculus GN=Immt PE=1 SV=1	Immt	1.151	0.561476
Charged multivesicular body protein 2b OS=Mus musculus GN=Chmp2b PE=1 SV=1	Chmp2b	1.147	0.561476
Casein kinase I isoform delta OS=Mus musculus GN=Csnk1d PE=1 SV=2	Csnk1d	0.947	0.561476
Gamma-butyrobetaine dioxygenase OS=Mus musculus GN=Bbox1 PE=1 SV=1	Bbox1	1.208	0.562864
Ras and Rab interactor 2 OS=Mus musculus GN=Rin2 PE=1 SV=1	Rin2	0.953	0.563896
Aconitate hydratase, mitochondrial OS=Mus musculus GN=Aco2 PE=1 SV=1	Aco2	1.151	0.564163
Keratin, type I cuticular Ha6 OS=Homo sapiens GN=KRT36 PE=1 SV=1	KRT36	0.827	0.564163
F-box/LRR-repeat protein 20 (Fragment) OS=Mus musculus GN=Fbxl20 PE=1 SV=1	Fbxl20	1.206	0.566794
Serine/arginine-rich splicing factor 9 OS=Mus musculus GN=Srsf9 PE=1 SV=1	Srsf9	0.954	0.566794
Catechol O-methyltransferase domain-containing protein 1 OS=Mus musculus GN=Comtd1 PE=1 SV=1	Comtd1	1.164	0.566817
60 kDa heat shock protein, mitochondrial OS=Mus musculus GN=Hspd1 PE=1 SV=1	Hspd1	1.15	0.569345
PDZ domain-containing protein GIPC1 OS=Mus musculus GN=Gipc1 PE=1 SV=1	Gipc1	0.947	0.571805
Protein unc-80 homolog OS=Mus musculus GN=Unc80 PE=1 SV=1	Unc80	0.924	0.573133
Netrin-1 OS=Mus musculus GN=Ntn1 PE=1 SV=3	Ntn1	0.831	0.573133
Propionyl-CoA carboxylase alpha chain, mitochondrial OS=Mus musculus GN=Pcca PE=1 SV=2	Pcca	1.144	0.573849
MMS19 nucleotide excision repair protein homolog OS=Mus musculus GN=Mms19 PE=1 SV=1	Mms19	1.144	0.574332
Guanine nucleotide-binding protein G(I)/G(S)/G(T) subunit beta-2 (Fragment) OS=Mus musculus GN=Gnb2 PE=1 SV=1	Gnb2	0.814	0.579097
Ubiquitin conjugation factor E4 B OS=Mus musculus GN=Ube4b PE=1 SV=3	Ube4b	1.256	0.580819
Phosphatidylinositol 5-phosphate 4-kinase type-2 gamma OS=Mus musculus GN=Pip4k2c PE=1 SV=1	Pip4k2c	1.157	0.580972
Rho-related GTP-binding protein RhoB OS=Mus musculus GN=Rhob PE=1 SV=1	Rhob	0.937	0.581006
Fumarylacetoacetate hydrolase domain-containing 2A OS=Mus musculus GN=Fahd2a PE=1 SV=1	Fahd2a	1.131	0.581484
Actin-binding LIM protein 2 OS=Mus musculus GN=Ablim2 PE=1 SV=1	Ablim2	0.949	0.583093
Repulsive guidance molecule A OS=Mus musculus GN=Rgma PE=1 SV=1	Rgma	0.933	0.583591
Protein SOGA3 OS=Mus musculus GN=Soga3 PE=1 SV=2	Soga3	0.94	0.584597
Basic leucine zipper and W2 domain-containing protein 2 OS=Mus musculus GN=Bzw2 PE=1 SV=1	Bzw2	1.18	0.586169
Clathrin interactor 1 OS=Mus musculus GN=Clint1 PE=1 SV=1	Clint1	1.134	0.587004
14-3-3 protein beta/alpha OS=Mus musculus GN=Ywhab PE=1 SV=3	Ywhab	1.153	0.587196
THO complex subunit 4 OS=Mus musculus GN=Alyref PE=1 SV=3	Alyref	0.968	0.587196
Sorting and assembly machinery component 50 homolog OS=Mus musculus GN=Samm50 PE=1 SV=1	Samm50	1.148	0.588147
E3 ubiquitin-protein ligase rififylin (Fragment) OS=Mus musculus GN=Rffl PE=1 SV=1	Rffl	0.938	0.589394
Hydroxyacyl-coenzyme A dehydrogenase, mitochondrial OS=Mus musculus GN=Hadh PE=1 SV=2	Hadh	1.131	0.589418
NADH dehydrogenase (ubiquinone) complex I, assembly factor 6 OS=Mus musculus GN=Ndufaf6 PE=1 SV=1	Ndufaf6	0.935	0.589598
RNA polymerase II-associated protein 1 OS=Mus musculus GN=Rpap1 PE=1 SV=1	Rpap1	1.354	0.589665
Minor histocompatibility antigen H13 OS=Mus musculus GN=Hm13 PE=1 SV=1	Hm13	1.152	0.589665
Fatty acid desaturase 3 OS=Mus musculus GN=Fads3 PE=2 SV=2	Fads3	0.94	0.589665
DNA-directed RNA polymerases I, II, and III subunit RPABC5 OS=Mus musculus GN=Polr2l PE=3 SV=1	Polr2l	0.931	0.589665
RIKEN cDNA 1110051M20 gene OS=Mus musculus GN=1110051M20Rik PE=1 SV=1	Cstpp1	0.922	0.589665
Ubiquitin carboxyl-terminal hydrolase 15 OS=Mus musculus GN=Usp15 PE=1 SV=1	Usp15	0.966	0.589723
28S ribosomal protein S34, mitochondrial OS=Mus musculus GN=Mrps34 PE=1 SV=1	Mrps34	1.169	0.59198
Alpha-parvin OS=Mus musculus GN=Parva PE=1 SV=1	Parva	1.212	0.597982
Semaphorin-4D OS=Mus musculus GN=Sema4d PE=1 SV=2	Sema4d	1.21	0.597982
Myosin regulatory light chain 10 OS=Mus musculus GN=Myl10 PE=1 SV=1	Myl10	1.207	0.597982
Protein argonaute-1 OS=Mus musculus GN=Ago1 PE=1 SV=2	Ago1	1.188	0.597982
Ceruloplasmin OS=Mus musculus GN=Cp PE=1 SV=1	Cp	1.148	0.597982
Mitochondrial glutamate carrier 2 OS=Mus musculus GN=Slc25a18 PE=1 SV=4	Slc25a18	1.143	0.597982
ATPase family AAA domain-containing protein 1 OS=Mus musculus GN=Atad1 PE=1 SV=1	Atad1	1.141	0.597982
Vacuolar protein sorting 16 (Yeast) OS=Mus musculus GN=Vps16 PE=1 SV=1	Vps16	0.951	0.597982
Calcium-binding mitochondrial carrier protein SCaMC-3 OS=Mus musculus GN=Slc25a23 PE=1 SV=1	Slc25a23	0.919	0.597982
Protein DDI1 homolog 2 OS=Mus musculus GN=Ddi2 PE=1 SV=1	Ddi2	0.901	0.597982
Dimethyladenosine transferase 1, mitochondrial OS=Mus musculus GN=Tfb1m PE=1 SV=1	Tfb1m	0.935	0.598033
Proline-rich AKT1 substrate 1 OS=Mus musculus GN=Akt1s1 PE=1 SV=1	Akt1s1	0.946	0.598436
Protein zyg-11 homolog B OS=Mus musculus GN=Zyg11b PE=1 SV=2	Zyg11b	1.272	0.598525
Somatostatin OS=Mus musculus GN=Sst PE=3 SV=1	Sst	0.969	0.59909
Adenylate cyclase type 8 OS=Mus musculus GN=Adcy8 PE=1 SV=2	Adcy8	0.938	0.59909
GRAM domain-containing protein 3 OS=Mus musculus GN=Gramd3 PE=1 SV=1	Gramd3	0.925	0.59909
Transcriptional repressor p66-beta OS=Mus musculus GN=Gatad2b PE=1 SV=1	Gatad2b	0.939	0.599096
Small VCP/p97-interacting protein OS=Mus musculus GN=Svip PE=3 SV=1	Svip	0.951	0.602947
GAS2-like protein 1 OS=Mus musculus GN=Gas2l1 PE=1 SV=1	Gas2l1	0.935	0.603097
MCG6895 OS=Mus musculus GN=2210016F16Rik PE=1 SV=1	2210016F16Rik	1.312	0.604544
Condensin-2 complex subunit H2 OS=Mus musculus GN=Ncaph2 PE=1 SV=1	Ncaph2	1.306	0.606278
GDP-mannose 4,6 dehydratase OS=Mus musculus GN=Gmds PE=1 SV=1	Gmds	1.252	0.606278
ZW10 interactor OS=Mus musculus GN=Zwint PE=1 SV=1	Zwint	1.142	0.606278
H-2 class I histocompatibility antigen, L-D alpha chain OS=Mus musculus GN=H2-L PE=1 SV=2	H2-L	1.128	0.606278
Small nuclear ribonucleoprotein F OS=Mus musculus GN=Snrpf PE=1 SV=1	Snrpf	1.158	0.60696
Sphingosine 1-phosphate receptor 5 OS=Mus musculus GN=S1pr5 PE=1 SV=1	S1pr5	0.968	0.609786
Mitogen-activated protein kinase kinase kinase 9 OS=Mus musculus GN=Map3k9 PE=2 SV=2	Map3k9	1.154	0.610217
Brain and acute leukemia cytoplasmic protein OS=Mus musculus GN=Baalc PE=2 SV=3	Baalc	1.354	0.610702
Capping protein (Actin filament), gelsolin-like OS=Mus musculus GN=Capg PE=1 SV=1	Capg	1.157	0.610702
MICOS complex subunit MIC60 OS=Mus musculus GN=Immt PE=1 SV=1	Immt	1.151	0.610702
Actin-related protein 2/3 complex subunit 5-like protein OS=Mus musculus GN=Arpc5l PE=1 SV=1	Arpc5l	1.151	0.610702
ADP-ribosylation factor GTPase-activating protein 3 OS=Mus musculus GN=Arfgap3 PE=1 SV=1	Arfgap3	1.147	0.610702
Sparc/osteonectin, cwcv and kazal-like domains proteoglycan 1 OS=Mus musculus GN=Spock1 PE=1 SV=1	Spock1	0.972	0.610702
Complement C1q subcomponent subunit B OS=Mus musculus GN=C1qb PE=1 SV=2	C1qb	0.947	0.610702
Serine/threonine-protein kinase PRP4 homolog OS=Mus musculus GN=Prpf4b PE=1 SV=3	Prpf4b	0.947	0.610702
BRISC complex subunit Abro1 (Fragment) OS=Mus musculus GN=Fam175b PE=1 SV=2	Abraxas2	0.937	0.610702
Versican core protein OS=Mus musculus GN=Vcan PE=1 SV=1	Vcan	0.94	0.61094
Serine/threonine-protein phosphatase 6 regulatory ankyrin repeat subunit A OS=Mus musculus GN=Ankrd28 PE=1 SV=1	Ankrd28	0.971	0.611015
Guanine nucleotide-binding protein-like 3 OS=Mus musculus GN=Gnl3 PE=1 SV=2	Gnl3	0.879	0.611015
Ragulator complex protein LAMTOR1 OS=Mus musculus GN=Lamtor1 PE=1 SV=1	Lamtor1	0.944	0.611081
Solute carrier family 17 (Sodium-dependent inorganic phosphate cotransporter), member 6, isoform CRA_a OS=Mus musculus GN=Slc17a6 PE=1 SV=1	Slc17a6	1.131	0.611114
Galectin-related protein OS=Mus musculus GN=Lgalsl PE=1 SV=1	Lgalsl	1.238	0.61189
Poly [ADP-ribose] polymerase OS=Mus musculus GN=Parp1 PE=1 SV=1	Parp1	0.969	0.612831
Tubulin alpha-8 chain OS=Mus musculus GN=Tuba8 PE=1 SV=1	Tuba8	1.141	0.614693
Serum paraoxonase/arylesterase 2 OS=Mus musculus GN=Pon2 PE=1 SV=2	Pon2	0.922	0.615009
Transmembrane protein 160 OS=Mus musculus GN=Tmem160 PE=2 SV=1	Tmem160	1.207	0.615253
Prohibitin OS=Mus musculus GN=Phb PE=1 SV=1	Phb1	1.145	0.615253
Apoptosis-inducing factor 2 OS=Mus musculus GN=Aifm2 PE=1 SV=1	Aifm2	0.97	0.615253
Chitinase domain-containing protein 1 OS=Mus musculus GN=Chid1 PE=1 SV=1	Chid1	0.967	0.615253
DOMON domain-containing protein FRRS1L OS=Mus musculus GN=Frrs1l PE=1 SV=1	Frrs1l	0.962	0.615253
Fasciculation and elongation protein zeta-1 OS=Mus musculus GN=Fez1 PE=1 SV=2	Fez1	0.947	0.615253
Retinitis pigmentosa 9 protein homolog OS=Mus musculus GN=rp9 PE=1 SV=1	rp9	0.942	0.615253
Serine/threonine-protein kinase TAO2 (Fragment) OS=Mus musculus GN=Taok2 PE=1 SV=1	Taok2	1.147	0.616626
Calcium-transporting ATPase OS=Mus musculus GN=Atp2b2 PE=1 SV=1	Atp2b2	1.145	0.616711
Perilipin-3 OS=Mus musculus GN=Plin3 PE=1 SV=1	Plin3	1.146	0.619138
Ras association domain-containing protein 8 OS=Mus musculus GN=Rassf8 PE=2 SV=1	Rassf8	0.92	0.620068
Peroxiredoxin 6 OS=Mus musculus GN=Prdx6 PE=1 SV=1	Prdx6	1.144	0.620728
Purkinje cell protein 4-like protein 1 OS=Mus musculus GN=Pcp4l1 PE=1 SV=1	Pcp4l1	1.149	0.620957
Repressor of yield of DENV protein homolog OS=Mus musculus GN=Ryden PE=2 SV=1	Shfl	0.969	0.621626
Alpha-synuclein OS=Mus musculus GN=Snca PE=1 SV=2	Snca	0.941	0.621626
E3 ubiquitin-protein ligase MIB2 OS=Mus musculus GN=Mib2 PE=1 SV=2	Mib2	0.897	0.621626
Protein YIPF5 OS=Mus musculus GN=Yipf5 PE=1 SV=1	Yipf5	1.15	0.62227
ERI1 exoribonuclease 3 (Fragment) OS=Mus musculus GN=Eri3 PE=1 SV=1	Eri3	0.934	0.623687
ELAV-like protein 1 OS=Mus musculus GN=Elavl1 PE=1 SV=2	Elavl1	0.951	0.624141
Acyl-coenzyme A thioesterase THEM4 OS=Mus musculus GN=Them4 PE=1 SV=1	Them4	1.147	0.624369
Heat shock protein HSP 90-beta OS=Mus musculus GN=Hsp90ab1 PE=1 SV=3	Hsp90ab1	0.941	0.624369
Potassium voltage-gated channel subfamily A member 4 OS=Mus musculus GN=Kcna4 PE=1 SV=2	Kcna4	0.924	0.624369
WD repeat-containing protein 54 OS=Mus musculus GN=Wdr54 PE=1 SV=1	Wdr54	1.217	0.626234
Endothelin-converting enzyme-like 1 OS=Mus musculus GN=Ecel1 PE=2 SV=2	Ecel1	1.156	0.628485
Cerebellar degeneration-related protein 2 OS=Mus musculus GN=Cdr2 PE=1 SV=2	Cdr2	1.205	0.632097
Isochorismatase domain-containing protein 2A OS=Mus musculus GN=Isoc2a PE=1 SV=1	Isoc2a	1.18	0.632097
Perilipin-4 OS=Mus musculus GN=Plin4 PE=1 SV=2	Plin4	1.146	0.632097
Sodium- and chloride-dependent GABA transporter 3 OS=Mus musculus GN=Slc6a11 PE=1 SV=2	Slc6a11	1.145	0.632097
Gamma-enolase OS=Mus musculus GN=Eno2 PE=1 SV=2	Eno2	1.143	0.632097
Coactosin-like protein OS=Mus musculus GN=Cotl1 PE=1 SV=3	Cotl1	1.138	0.632097
Calbindin OS=Mus musculus GN=Calb1 PE=1 SV=2	Calb1	1.138	0.632097
Eukaryotic translation initiation factor 2B, subunit 3 OS=Mus musculus GN=Eif2b3 PE=1 SV=1	Eif2b3	0.971	0.632097
Zinc transporter SLC39A7 OS=Mus musculus GN=Slc39a7 PE=1 SV=2	Slc39a7	0.966	0.632097
Transcriptional activator protein Pur-beta OS=Mus musculus GN=Purb PE=1 SV=3	Purb	0.952	0.632097
Tubulin alpha-1C chain OS=Mus musculus GN=Tuba1c PE=1 SV=1	Tuba1c	0.942	0.632097
Partitioning defective 6 homolog alpha OS=Mus musculus GN=Pard6a PE=1 SV=1	Pard6a	0.933	0.632097
Dehydrogenase/reductase SDR family member 4 OS=Mus musculus GN=Dhrs4 PE=1 SV=3	Dhrs4	1.133	0.633855
Uncharacterized protein KIAA0895 OS=Mus musculus GN=Kiaa0895 PE=2 SV=2	Matcap2	1.124	0.633855
28S ribosomal protein S28, mitochondrial OS=Mus musculus GN=Mrps28 PE=1 SV=1	Mrps28	1.155	0.635023
Zinc finger protein DZIP1L OS=Mus musculus GN=Dzip1l PE=1 SV=1	Dzip1l	0.94	0.635023
Acyl-CoA-binding protein OS=Mus musculus GN=Dbi PE=1 SV=2	Dbi	1.147	0.636061
Embigin OS=Mus musculus GN=Emb PE=1 SV=2	Emb	1.133	0.637135
Erlin-2 OS=Mus musculus GN=Erlin2 PE=1 SV=1	Erlin2	0.94	0.637135
Protein ZNF365 OS=Mus musculus GN=Znf365 PE=1 SV=1	Znf365	0.861	0.637135
UV excision repair protein RAD23 homolog B OS=Mus musculus GN=Rad23b PE=1 SV=2	Rad23b	1.135	0.64018
WD repeat-containing protein mio OS=Mus musculus GN=Mios PE=1 SV=2	Mios	0.96	0.640615
Protein FAM219A OS=Mus musculus GN=Fam219a PE=1 SV=2	Fam219a	1.211	0.643325
Heterogeneous nuclear ribonucleoprotein D, isoform CRA_b OS=Mus musculus GN=Hnrnpd PE=1 SV=1	Hnrnpd	0.962	0.643325
Pyrroline-5-carboxylate reductase 3 OS=Mus musculus GN=Pycrl PE=1 SV=2	Pycr3	0.956	0.644747
Myocardial zonula adherens protein (Fragment) OS=Mus musculus GN=Myzap PE=4 SV=1	Myzap	1.149	0.646617
TSC22 domain family protein 3 OS=Mus musculus GN=Tsc22d3 PE=1 SV=1	Tsc22d3	1.159	0.647186
Peripherin OS=Mus musculus GN=Prph PE=1 SV=1	Prph	1.142	0.649388
Monoacylglycerol lipase ABHD6 OS=Mus musculus GN=Abhd6 PE=1 SV=1	Abhd6	0.938	0.649388
28S ribosomal protein S27, mitochondrial OS=Mus musculus GN=Mrps27 PE=1 SV=2	Mrps27	1.127	0.649814
Spectrin beta chain OS=Mus musculus GN=Sptb PE=1 SV=1	Sptb	1.142	0.650015
Homer protein homolog 1 OS=Mus musculus GN=Homer1 PE=1 SV=1	Homer1	1.155	0.650314
Calcium and integrin-binding protein 1 OS=Mus musculus GN=Cib1 PE=1 SV=3	Cib1	1.3	0.650394
Hyccin OS=Mus musculus GN=Fam126a PE=1 SV=3	Hycc1	1.279	0.650394
Putative uncharacterized protein OS=Mus musculus GN=Upf3b PE=1 SV=1	Upf3b	1.25	0.650394
Probable proline--tRNA ligase, mitochondrial OS=Mus musculus GN=Pars2 PE=1 SV=2	Pars2	1.219	0.650394
Caldesmon 1 OS=Mus musculus GN=Cald1 PE=1 SV=1	Cald1	1.18	0.650394
Dephospho-CoA kinase domain-containing protein OS=Mus musculus GN=Dcakd PE=1 SV=1	Dcakd	1.169	0.650394
Sphingosine kinase 2 OS=Mus musculus GN=Sphk2 PE=1 SV=2	Sphk2	1.165	0.650394
Protein FAM171B OS=Mus musculus GN=Fam171b PE=1 SV=2	Fam171b	1.153	0.650394
Electron transfer flavoprotein subunit alpha, mitochondrial OS=Mus musculus GN=Etfa PE=1 SV=2	Etfa	1.142	0.650394
N(G),N(G)-dimethylarginine dimethylaminohydrolase 2 OS=Mus musculus GN=Ddah2 PE=1 SV=1	Ddah2	1.136	0.650394
CD82 antigen OS=Mus musculus GN=Cd82 PE=1 SV=1	Cd82	1.133	0.650394
Monocyte differentiation antigen CD14 OS=Mus musculus GN=Cd14 PE=1 SV=1	Cd14	0.971	0.650394
Inverted formin-2 OS=Mus musculus GN=Inf2 PE=1 SV=1	Inf2	0.955	0.650394
MKI67 FHA domain-interacting nucleolar phosphoprotein OS=Mus musculus GN=Nifk PE=1 SV=1	Nifk	0.936	0.650394
Protein PML OS=Mus musculus GN=Pml PE=1 SV=3	Pml	0.925	0.650394
Iron-sulfur protein NUBPL OS=Mus musculus GN=Nubpl PE=1 SV=2	Nubpl	0.903	0.650394
Y-box-binding protein 3 OS=Mus musculus GN=Ybx3 PE=1 SV=2	Ybx3	0.869	0.650394
Troponin I, slow skeletal muscle (Fragment) OS=Mus musculus GN=Tnni1 PE=1 SV=1	Tnni1	0.842	0.650394
Mitochondrial carrier homolog 2 OS=Mus musculus GN=Mtch2 PE=1 SV=1	Mtch2	1.146	0.652647
Stress-70 protein, mitochondrial OS=Mus musculus GN=Hspa9 PE=1 SV=3	Hspa9	1.141	0.652647
Stomatin-like protein 2, mitochondrial OS=Mus musculus GN=Stoml2 PE=1 SV=1	Stoml2	1.122	0.652647
Basement membrane-specific heparan sulfate proteoglycan core protein OS=Mus musculus GN=Hspg2 PE=1 SV=1	Hspg2	1.141	0.653242
Glycine--tRNA ligase OS=Mus musculus GN=Gars PE=1 SV=1	Gars1	0.954	0.654234
Microtubule-actin cross-linking factor 1 (Fragment) OS=Mus musculus GN=Macf1 PE=1 SV=6	Macf1	0.934	0.654234
Neuroligin 4-like OS=Mus musculus GN=Nlgn4l PE=1 SV=1	Nlgn4l	0.941	0.654378
Transmembrane 9 superfamily member 2 OS=Mus musculus GN=Tm9sf2 PE=1 SV=1	Tm9sf2	1.149	0.655679
Tumor protein p63-regulated gene 1-like protein OS=Mus musculus GN=Tprg1l PE=1 SV=1	Tprg1l	1.198	0.656659
Complex I intermediate-associated protein 30, mitochondrial OS=Mus musculus GN=Ndufaf1 PE=1 SV=1	Ndufaf1	1.197	0.657426
F-box/SPRY domain-containing protein 1 OS=Mus musculus GN=Fbxo45 PE=1 SV=2	Fbxo45	0.952	0.657741
Calcium-binding mitochondrial carrier protein SCaMC-1 OS=Mus musculus GN=Slc25a24 PE=1 SV=1	Slc25a24	1.158	0.658543
Importin subunit alpha-3 OS=Mus musculus GN=Kpna4 PE=1 SV=1	Kpna4	0.954	0.658543
Complexin-2 OS=Mus musculus GN=Cplx2 PE=1 SV=1	Cplx2	1.154	0.659652
SMT3 suppressor of mif two 3 homolog 3 (Yeast), isoform CRA_b OS=Mus musculus GN=Sumo3 PE=1 SV=1	Sumo3	1.182	0.663207
PDZ and LIM domain protein 2 OS=Mus musculus GN=Pdlim2 PE=1 SV=1	Pdlim2	1.152	0.663207
NADH dehydrogenase [ubiquinone] 1 beta subcomplex subunit 7 OS=Mus musculus GN=Ndufb7 PE=1 SV=3	Ndufb7	1.145	0.663207
MCG16539 OS=Mus musculus GN=Pnmal2 PE=1 SV=1	Pnma8b	1.136	0.663207
Serine/threonine-protein kinase N1 OS=Mus musculus GN=Pkn1 PE=1 SV=3	Pkn1	0.936	0.663207
Bromodomain-containing protein 3 (Fragment) OS=Mus musculus GN=Brd3 PE=1 SV=1	Brd3	1.209	0.663378
Serine/threonine-protein phosphatase 2B catalytic subunit alpha isoform OS=Mus musculus GN=Ppp3ca PE=1 SV=1	Ppp3ca	1.143	0.663378
Serine beta-lactamase-like protein LACTB, mitochondrial OS=Mus musculus GN=Lactb PE=1 SV=1	Lactb	1.128	0.663414
Uncharacterized protein C7orf57 homolog OS=Mus musculus GN=Gm11992 PE=1 SV=1	Gm11992	1.231	0.663584
Solute carrier family 2, facilitated glucose transporter member 1 OS=Mus musculus GN=Slc2a1 PE=1 SV=4	Slc2a1	1.141	0.663584
Ubiquitin carboxyl-terminal hydrolase 10 OS=Mus musculus GN=Usp10 PE=1 SV=3	Usp10	0.971	0.663584
ATP-dependent RNA helicase DHX29 OS=Mus musculus GN=Dhx29 PE=1 SV=1	Dhx29	0.965	0.663584
Transmembrane protein 256 OS=Mus musculus GN=Tmem256 PE=1 SV=1	Tmem256	0.929	0.663584
EMILIN-2 OS=Mus musculus GN=Emilin2 PE=1 SV=1	Emilin2	0.925	0.664556
WW domain-binding protein 11 OS=Mus musculus GN=Wbp11 PE=1 SV=2	Wbp11	1.151	0.666561
Nucleolysin TIAR OS=Mus musculus GN=Tial1 PE=1 SV=1	Tial1	1.142	0.667508
Leucine zipper transcription factor-like protein 1 (Fragment) OS=Mus musculus GN=Lztfl1 PE=1 SV=1	Lztfl1	1.151	0.668615
Electron transfer flavoprotein-ubiquinone oxidoreductase, mitochondrial OS=Mus musculus GN=Etfdh PE=1 SV=1	Etfdh	1.134	0.668615
Gelsolin (Fragment) OS=Mus musculus GN=Gsn PE=1 SV=1	Gsn	0.978	0.668615
Inorganic pyrophosphatase 2, mitochondrial OS=Mus musculus GN=Ppa2 PE=1 SV=1	Ppa2	1.136	0.668799
Inactive ubiquitin carboxyl-terminal hydrolase 54 OS=Mus musculus GN=Usp54 PE=1 SV=2	Usp54	0.968	0.66902
Serine (Or cysteine) peptidase inhibitor, clade A, member 3N, isoform CRA_a OS=Mus musculus GN=Serpina3n PE=1 SV=1	Serpina3n	0.955	0.66902
Trifunctional enzyme subunit alpha, mitochondrial OS=Mus musculus GN=Hadha PE=1 SV=1	Hadha	1.139	0.669613
Protein NipSnap homolog 3B OS=Mus musculus GN=Nipsnap3b PE=1 SV=1	Nipsnap3b	1.189	0.670227
Thioredoxin-related transmembrane protein 4 OS=Mus musculus GN=Tmx4 PE=1 SV=2	Tmx4	1.156	0.670387
Mitochondrial inner membrane protein OXA1L OS=Mus musculus GN=Oxa1l PE=1 SV=1	Oxa1l	1.17	0.671823
Serine/arginine-rich splicing factor 6 OS=Mus musculus GN=Srsf6 PE=1 SV=1	Srsf6	0.957	0.6719
Chitinase-like protein 3 OS=Mus musculus GN=Chil3 PE=1 SV=2	Chil3	1.155	0.672666
Estradiol 17-beta-dehydrogenase 8 OS=Mus musculus GN=Hsd17b8 PE=1 SV=2	Hsd17b8	1.147	0.673188
Fibulin-5 OS=Mus musculus GN=Fbln5 PE=1 SV=1	Fbln5	1.17	0.674097
Syntaxin-1B OS=Mus musculus GN=Stx1b PE=1 SV=1	Stx1b	1.138	0.674097
SH2 domain-containing protein 5 OS=Mus musculus GN=Sh2d5 PE=1 SV=1	Sh2d5	1.332	0.674945
Sterol O-acyltransferase 1 OS=Mus musculus GN=Soat1 PE=1 SV=2	Soat1	1.197	0.674945
Potassium voltage-gated channel subfamily D member 2 OS=Mus musculus GN=Kcnd2 PE=1 SV=1	Kcnd2	1.157	0.674945
Protein N-terminal glutamine amidohydrolase OS=Mus musculus GN=Wdyhv1 PE=1 SV=1	Ntaq1	0.907	0.674945
Carboxymethylenebutenolidase homolog OS=Mus musculus GN=Cmbl PE=1 SV=1	Cmbl	1.145	0.677673
Tumor protein D54 (Fragment) OS=Mus musculus GN=Tpd52l2 PE=1 SV=1	Tpd52l2	1.135	0.677673
Aminopeptidase N OS=Mus musculus GN=Anpep PE=1 SV=4	Anpep	1.134	0.677673
2-oxoglutarate and iron-dependent oxygenase domain-containing protein 2 OS=Mus musculus GN=Ogfod2 PE=4 SV=1	Ogfod2	0.947	0.677673
Glycine cleavage system H protein, mitochondrial OS=Mus musculus GN=Gcsh PE=1 SV=2	Gcsh	1.15	0.680947
Membrane-associated progesterone receptor component 2 OS=Mus musculus GN=Pgrmc2 PE=1 SV=2	Pgrmc2	0.972	0.681297
Integrator complex subunit 3 OS=Mus musculus GN=Ints3 PE=1 SV=1	Ints3	0.935	0.683428
Transmembrane protein 143 OS=Mus musculus GN=Tmem143 PE=1 SV=1	Tmem143	1.142	0.684056
Protein Hook homolog 3 OS=Mus musculus GN=Hook3 PE=1 SV=2	Hook3	0.968	0.684772
Extended synaptotagmin-1 OS=Mus musculus GN=Esyt1 PE=1 SV=2	Esyt1	1.151	0.68482
Receptor expression-enhancing protein 1 OS=Mus musculus GN=Reep1 PE=1 SV=1	Reep1	1.151	0.68482
Neuron-specific calcium-binding protein hippocalcin (Fragment) OS=Mus musculus GN=Hpca PE=1 SV=1	Hpca	1.144	0.68482
Polymerase delta-interacting protein 2 (Fragment) OS=Mus musculus GN=Poldip2 PE=1 SV=1	Poldip2	1.144	0.68482
Galectin-1 OS=Mus musculus GN=Lgals1 PE=1 SV=3	Lgals1	1.13	0.68482
Trafficking protein particle complex 1, isoform CRA_a OS=Mus musculus GN=Trappc1 PE=1 SV=1	Trappc1	0.969	0.68482
40S ribosomal protein S15 OS=Mus musculus GN=Rps15 PE=1 SV=2	Rps15	0.96	0.68482
Unconventional myosin-Va OS=Mus musculus GN=Myo5a PE=1 SV=1	Myo5a	0.947	0.68482
Guanine nucleotide-binding protein-like 3-like protein OS=Mus musculus GN=Gnl3l PE=1 SV=1	Gnl3l	0.931	0.68482
Beta-1,4 N-acetylgalactosaminyltransferase 1 OS=Mus musculus GN=B4galnt1 PE=1 SV=1	B4galnt1	0.914	0.68482
Coiled-coil domain-containing protein 137 (Fragment) OS=Mus musculus GN=Ccdc137 PE=1 SV=2	Ccdc137	0.912	0.68482
Tetraspanin-7 OS=Mus musculus GN=Tspan7 PE=1 SV=2	Tspan7	1.204	0.686213
Synaptic functional regulator FMR1 OS=Mus musculus GN=Fmr1 PE=1 SV=1	Fmr1	0.975	0.686213
Gap junction beta-1 protein OS=Mus musculus GN=Gjb1 PE=1 SV=3	Gjb1	0.956	0.686213
E3 ubiquitin-protein ligase RNF170 (Fragment) OS=Mus musculus GN=Rnf170 PE=1 SV=1	Rnf170	0.94	0.686213
Antigen peptide transporter 2 OS=Mus musculus GN=Tap2 PE=1 SV=1	Tap2	0.939	0.687963
cAMP and cAMP-inhibited cGMP 3',5'-cyclic phosphodiesterase 10A OS=Mus musculus GN=Pde10a PE=1 SV=2	Pde10a	0.912	0.688717
Malate dehydrogenase, cytoplasmic OS=Mus musculus GN=Mdh1 PE=1 SV=3	Mdh1	0.947	0.688933
Probable RNA polymerase II nuclear localization protein SLC7A6OS OS=Mus musculus GN=Slc7a6os PE=1 SV=1	Slc7a6os	1.326	0.688948
DAZ-associated protein 1 OS=Mus musculus GN=Dazap1 PE=1 SV=2	Dazap1	1.198	0.688948
Epithelial discoidin domain-containing receptor 1 OS=Mus musculus GN=Ddr1 PE=2 SV=2	Ddr1	1.153	0.688948
Conserved oligomeric Golgi complex subunit 3 OS=Mus musculus GN=Cog3 PE=1 SV=3	Cog3	1.151	0.688948
Glutamate receptor ionotropic, NMDA 2A OS=Mus musculus GN=Grin2a PE=1 SV=2	Grin2a	1.147	0.688948
Bisphosphoglycerate mutase OS=Mus musculus GN=Bpgm PE=1 SV=2	Bpgm	1.141	0.688948
Neuroplastin OS=Mus musculus GN=Nptn PE=1 SV=3	Nptn	1.136	0.688948
Ubiquilin-2 OS=Mus musculus GN=Ubqln2 PE=1 SV=2	Ubqln2	1.133	0.688948
Asparagine synthetase [glutamine-hydrolyzing] OS=Mus musculus GN=Asns PE=1 SV=3	Asns	0.967	0.688948
Calcium-transporting ATPase OS=Mus musculus GN=Atp2c1 PE=1 SV=1	Atp2c1	0.944	0.688948
Protein misato homolog 1 OS=Mus musculus GN=Msto1 PE=1 SV=1	Msto1	0.934	0.688948
Sodium/potassium-transporting ATPase subunit alpha-1 OS=Mus musculus GN=Atp1a1 PE=1 SV=1	Atp1a1	1.136	0.68962
Adhesion G protein-coupled receptor B3 OS=Mus musculus GN=Adgrb3 PE=1 SV=1	Adgrb3	1.195	0.689744
Myosin light chain 3 OS=Mus musculus GN=Myl3 PE=1 SV=4	Myl3	1.147	0.690712
Putative uncharacterized protein OS=Mus musculus GN=Srsf4 PE=1 SV=1	Srsf4	0.968	0.693559
Storkhead-box protein 2 OS=Mus musculus GN=Stox2 PE=2 SV=2	Stox2	0.916	0.693559
Cadherin-11 OS=Mus musculus GN=Cdh11 PE=1 SV=1	Cdh11	0.968	0.695623
RIKEN cDNA B630019K06 gene OS=Mus musculus GN=B630019K06Rik PE=1 SV=1	B630019K06Rik	1.191	0.696459
5'(3')-deoxyribonucleotidase, mitochondrial OS=Mus musculus GN=Nt5m PE=1 SV=1	Nt5m	1.148	0.696459
Vinexin OS=Mus musculus GN=Sorbs3 PE=1 SV=1	Sorbs3	0.965	0.696736
Nucleoporin Nup37 OS=Mus musculus GN=Nup37 PE=1 SV=2	Nup37	0.959	0.696736
Hmgn2 protein OS=Mus musculus GN=Hmgn2 PE=1 SV=1	Hmgn2	1.141	0.697322
Putative uncharacterized protein OS=Mus musculus GN=Tmem181a PE=1 SV=1	Tmem181a	0.938	0.698168
Protein quaking OS=Mus musculus GN=Qki PE=1 SV=1	Qki	1.14	0.698209
Putative uncharacterized protein OS=Mus musculus GN=Sf3b2 PE=1 SV=1	Sf3b2	0.959	0.698744
Ras-specific guanine nucleotide-releasing factor 1 OS=Mus musculus GN=Rasgrf1 PE=1 SV=2	Rasgrf1	0.961	0.699011
Protein-glutamine gamma-glutamyltransferase K OS=Mus musculus GN=Tgm1 PE=1 SV=1	Tgm1	0.957	0.699011
Protein PRRC2B OS=Mus musculus GN=Prrc2b PE=1 SV=1	Prrc2b	0.951	0.699011
Secretory carrier-associated membrane protein 3 OS=Mus musculus GN=Scamp3 PE=1 SV=3	Scamp3	1.173	0.700077
Glutamine--fructose-6-phosphate aminotransferase [isomerizing] 1 OS=Mus musculus GN=Gfpt1 PE=1 SV=3	Gfpt1	0.954	0.700077
10 kDa heat shock protein, mitochondrial OS=Mus musculus GN=Hspe1 PE=1 SV=2	Hspe1	1.136	0.700428
Peroxisomal multifunctional enzyme type 2 OS=Mus musculus GN=Hsd17b4 PE=1 SV=3	Hsd17b4	1.122	0.700428
Transformer-2 protein homolog beta OS=Mus musculus GN=Tra2b PE=1 SV=1	Tra2b	0.963	0.700428
Dedicator of cytokinesis protein 8 OS=Mus musculus GN=Dock8 PE=1 SV=4	Dock8	0.95	0.700428
Amyloid beta A4 precursor protein-binding family B member 2 OS=Mus musculus GN=Apbb2 PE=1 SV=1	Apbb2	0.938	0.700428
COX assembly mitochondrial protein 2 homolog OS=Mus musculus GN=Cmc2 PE=3 SV=1	Cmc2	0.936	0.700428
Apolipoprotein B-100 (Fragment) OS=Mus musculus GN=Apob PE=1 SV=1	Apob	0.862	0.700428
Secretory carrier-associated membrane protein 4 OS=Mus musculus GN=Scamp4 PE=1 SV=1	Scamp4	0.975	0.701266
Sodium- and chloride-dependent GABA transporter 1 OS=Mus musculus GN=Slc6a1 PE=1 SV=2	Slc6a1	1.134	0.7015
Ufm1-specific protease 1 OS=Mus musculus GN=Ufsp1 PE=1 SV=1	Ufsp1	0.913	0.70184
Thioredoxin domain-containing protein 9 (Fragment) OS=Mus musculus GN=Txndc9 PE=1 SV=1	Txndc9	1.201	0.703741
Myoferlin OS=Mus musculus GN=Myof PE=1 SV=2	Myof	1.19	0.703741
KxDL motif-containing protein 1 OS=Mus musculus GN=Kxd1 PE=1 SV=1	Kxd1	1.146	0.703741
BTB/POZ domain-containing protein 17 OS=Mus musculus GN=Btbd17 PE=1 SV=1	Btbd17	1.138	0.703741
Calcium-binding mitochondrial carrier protein Aralar1 OS=Mus musculus GN=Slc25a12 PE=1 SV=1	Slc25a12	1.135	0.703741
ATP synthase subunit d, mitochondrial OS=Mus musculus GN=Atp5h PE=1 SV=3	Atp5pd	1.135	0.703741
Nucleolar and coiled-body phosphoprotein 1 OS=Mus musculus GN=Nolc1 PE=2 SV=1	Nolc1	0.956	0.703741
Wiskott-Aldrich syndrome protein family member 1 OS=Mus musculus GN=Wasf1 PE=1 SV=2	Wasf1	0.956	0.703741
MCG134445, isoform CRA_a OS=Mus musculus GN=Mroh1 PE=1 SV=1		0.95	0.703741
Treacle protein OS=Mus musculus GN=Tcof1 PE=1 SV=1	Tcof1	0.948	0.703741
Programmed cell death protein 10 OS=Mus musculus GN=Pdcd10 PE=1 SV=1	Pdcd10	0.941	0.703741
Integral membrane protein 2C OS=Mus musculus GN=Itm2c PE=1 SV=2	Itm2c	0.981	0.705364
Aspartate aminotransferase, mitochondrial OS=Mus musculus GN=Got2 PE=1 SV=1	Got2	1.134	0.705598
Sodium/potassium-transporting ATPase subunit alpha-2 OS=Mus musculus GN=Atp1a2 PE=1 SV=1	Atp1a2	1.134	0.70599
U2 snRNP-associated SURP motif-containing protein OS=Mus musculus GN=U2surp PE=1 SV=3	U2surp	0.977	0.70599
Leucine-rich PPR motif-containing protein, mitochondrial OS=Mus musculus GN=Lrpprc PE=1 SV=2	Lrpprc	1.138	0.707482
MICOS complex subunit Mic25 OS=Mus musculus GN=Chchd6 PE=1 SV=2	Chchd6	1.137	0.70768
Tubulin beta-5 chain OS=Mus musculus GN=Tubb5 PE=1 SV=1	Tubb5	0.949	0.70768
Guanine nucleotide-binding protein G(I)/G(S)/G(O) subunit gamma-8 OS=Mus musculus GN=Gng8 PE=3 SV=1	Gng8	0.975	0.70944
Neutral ceramidase OS=Mus musculus GN=Asah2 PE=1 SV=1	Asah2	1.151	0.709897
Ubiquitin-like modifier-activating enzyme 6 OS=Mus musculus GN=Uba6 PE=1 SV=1	Uba6	1.148	0.711107
Phosphoinositide 3-kinase regulatory subunit 4 OS=Mus musculus GN=Pik3r4 PE=1 SV=3	Pik3r4	1.141	0.711107
Heme-binding protein 1 OS=Mus musculus GN=Hebp1 PE=1 SV=2	Hebp1	1.14	0.711107
FGGY carbohydrate kinase domain-containing protein OS=Mus musculus GN=Fggy PE=1 SV=1	Fggy	0.946	0.711107
Retinol dehydrogenase 13 OS=Mus musculus GN=Rdh13 PE=1 SV=1	Rdh13	1.296	0.711566
Glutamyl aminopeptidase OS=Mus musculus GN=Enpep PE=1 SV=1	Enpep	1.147	0.711566
Polyadenylate-binding protein 1 OS=Mus musculus GN=Pabpc1 PE=1 SV=2	Pabpc1	0.95	0.711566
Nuclear factor NF-kappa-B p100 subunit OS=Mus musculus GN=Nfkb2 PE=1 SV=1	Nfkb2	0.936	0.711566
Vesicle transport through interaction with t-SNAREs 1B homolog OS=Mus musculus GN=Vti1b PE=1 SV=1	Vti1b	0.977	0.7118
Amine oxidase [flavin-containing] A OS=Mus musculus GN=Maoa PE=1 SV=3	Maoa	1.143	0.71345
Ras-related protein Rab-24 OS=Mus musculus GN=Rab24 PE=1 SV=2	Rab24	1.13	0.715408
Zinc finger matrin-type protein 2 OS=Mus musculus GN=Zmat2 PE=2 SV=1	Zmat2	0.95	0.717987
MCG133388, isoform CRA_c OS=Mus musculus GN=Pcdhga2 PE=2 SV=1	Pcdhga2	0.887	0.717987
Phospholemman OS=Mus musculus GN=Fxyd1 PE=1 SV=1	Fxyd1	1.136	0.718125
Guanine nucleotide-binding protein G(I)/G(S)/G(O) subunit gamma-11 OS=Mus musculus GN=Gng11 PE=1 SV=1	Gng11	0.979	0.718125
Death-associated protein kinase 1 OS=Mus musculus GN=Dapk1 PE=1 SV=3	Dapk1	0.878	0.718125
Leucyl-cystinyl aminopeptidase OS=Mus musculus GN=Lnpep PE=1 SV=1	Lnpep	0.934	0.718364
Preprodynorphin (Fragment) OS=Mus musculus GN=Pdyn PE=1 SV=1	Pdyn	0.952	0.719301
Opioid binding protein/cell adhesion molecule-like OS=Mus musculus GN=Opcml PE=1 SV=1	Opcml	1.145	0.720471
Prohibitin-2 OS=Mus musculus GN=Phb2 PE=1 SV=1	Phb2	1.133	0.720471
NACHT and WD repeat domain-containing protein 2 OS=Mus musculus GN=Nwd2 PE=1 SV=2	Nwd2	0.949	0.720471
Ragulator complex protein LAMTOR2 OS=Mus musculus GN=Lamtor2 PE=1 SV=1	Lamtor2	0.973	0.721143
Transcription intermediary factor 1-beta OS=Mus musculus GN=Trim28 PE=1 SV=3	Trim28	0.968	0.721143
Protein transport protein Sec61 subunit alpha isoform 1 OS=Mus musculus GN=Sec61a1 PE=1 SV=2	Sec61a1	1.131	0.722097
Cyclin-dependent kinase 11B OS=Mus musculus GN=Cdk11b PE=1 SV=1	Cdk11b	0.945	0.722316
Putative uncharacterized protein OS=Mus musculus GN=Spata2 PE=1 SV=1	Spata2	0.95	0.723794
NAD(P) transhydrogenase, mitochondrial OS=Mus musculus GN=Nnt PE=1 SV=2	Nnt	1.137	0.724417
Stromal cell-derived factor 2-like protein 1 OS=Mus musculus GN=Sdf2l1 PE=1 SV=2	Sdf2l1	0.976	0.724417
Dedicator of cytokinesis protein 9 OS=Mus musculus GN=Dock9 PE=1 SV=1	Dock9	0.951	0.724417
Protein canopy homolog 2 OS=Mus musculus GN=Cnpy2 PE=1 SV=1	Cnpy2	1.191	0.725533
Cytochrome c oxidase subunit 7A1, mitochondrial OS=Mus musculus GN=Cox7a1 PE=1 SV=1	Cox7a1	1.135	0.725764
Protein spinster homolog 1 OS=Mus musculus GN=Spns1 PE=1 SV=1	Spns1	1.229	0.726993
FK506-binding protein 15 OS=Mus musculus GN=Fkbp15 PE=1 SV=2	Fkbp15	1.167	0.726993
Glycerol kinase OS=Mus musculus GN=Gk PE=1 SV=2	Gk	1.132	0.726993
Superoxide dismutase [Mn], mitochondrial OS=Mus musculus GN=Sod2 PE=1 SV=3	Sod2	1.132	0.726993
Dynactin subunit 4 OS=Mus musculus GN=Dctn4 PE=1 SV=1	Dctn4	0.964	0.726993
Barrier-to-autointegration factor OS=Mus musculus GN=Banf1 PE=1 SV=1	Banf1	0.961	0.726993
Serine/threonine-protein phosphatase 4 regulatory subunit 4 OS=Mus musculus GN=Ppp4r4 PE=1 SV=2	Ppp4r4	0.936	0.726993
Insulin-like growth factor-binding protein 5 OS=Mus musculus GN=Igfbp5 PE=1 SV=1	Igfbp5	0.93	0.726993
Transmembrane protein 229A OS=Mus musculus GN=Tmem229a PE=2 SV=1	Tmem229a	0.866	0.726993
Prefoldin subunit 5 OS=Mus musculus GN=Pfdn5 PE=1 SV=1	Pfdn5	1.129	0.72907
Neuro-oncological ventral antigen 2 OS=Mus musculus GN=Nova2 PE=1 SV=3		0.982	0.72907
Signal transducer and activator of transcription 3 OS=Mus musculus GN=Stat3 PE=1 SV=2	Stat3	0.958	0.72907
39S ribosomal protein L32, mitochondrial OS=Mus musculus GN=Mrpl32 PE=1 SV=1	Mrpl32	1.149	0.730513
TBC1 domain family member 17 OS=Mus musculus GN=Tbc1d17 PE=1 SV=1	Tbc1d17	0.952	0.730513
Astrotactin-1 OS=Mus musculus GN=Astn1 PE=1 SV=1	Astn1	0.931	0.730513
Partner of Y14 and mago OS=Mus musculus GN=Pym1 PE=1 SV=2	Pym1	1.147	0.731592
Protein transport protein Sec61 subunit alpha isoform 2 OS=Mus musculus GN=Sec61a2 PE=2 SV=3	Sec61a2	1.139	0.73163
Pleiotrophin OS=Mus musculus GN=Ptn PE=1 SV=1	Ptn	0.98	0.731998
Alpha-endosulfine OS=Mus musculus GN=Ensa PE=1 SV=1	Ensa	1.13	0.733954
Cerebellin-1 OS=Mus musculus GN=Cbln1 PE=1 SV=1	Cbln1	0.963	0.733954
Very-long-chain (3R)-3-hydroxyacyl-CoA dehydratase 3 OS=Mus musculus GN=Hacd3 PE=1 SV=2	Hacd3	1.136	0.734445
Potassium channel erg1a OS=Mus musculus GN=Kcnh2 PE=1 SV=1	Kcnh2	0.975	0.736058
Sn1-specific diacylglycerol lipase beta OS=Mus musculus GN=Daglb PE=1 SV=2	Daglb	0.964	0.736058
U2 small nuclear ribonucleoprotein B'' OS=Mus musculus GN=Snrpb2 PE=1 SV=1	Snrpb2	0.937	0.736095
Isoleucine--tRNA ligase, cytoplasmic OS=Mus musculus GN=Iars PE=1 SV=2	Iars1	0.968	0.737681
Putative peptidyl-tRNA hydrolase PTRHD1 OS=Mus musculus GN=Ptrhd1 PE=1 SV=1	Ptrhd1	0.92	0.737681
Synaptotagmin-1 OS=Mus musculus GN=Syt1 PE=1 SV=1	Syt1	1.127	0.737724
Solute carrier family 12 member 6 OS=Mus musculus GN=Slc12a6 PE=1 SV=2	Slc12a6	0.976	0.737724
Claudin domain-containing protein 1 OS=Mus musculus GN=Cldnd1 PE=1 SV=1	Cldnd1	0.968	0.737724
Semaphorin-6D OS=Mus musculus GN=Sema6d PE=1 SV=1	Sema6d	0.922	0.737724
Immunoglobulin superfamily member 8 OS=Mus musculus GN=Igsf8 PE=1 SV=1	Igsf8	1.132	0.73877
Isocitrate dehydrogenase [NAD] subunit, mitochondrial OS=Mus musculus GN=Idh3b PE=1 SV=1	Idh3b	1.131	0.73877
Glycerol-3-phosphate phosphatase OS=Mus musculus GN=Pgp PE=1 SV=1	Pgp	1.122	0.739
Fibroblast growth factor receptor substrate 3 OS=Mus musculus GN=Frs3 PE=1 SV=3	Frs3	0.912	0.739
Cyclin-dependent kinase 2-associated protein 1 OS=Mus musculus GN=Cdk2ap1 PE=1 SV=1	Cdk2ap1	1.207	0.739339
SAM and SH3 domain-containing protein 1 OS=Mus musculus GN=Sash1 PE=1 SV=1	Sash1	0.956	0.739339
Brefeldin A-inhibited guanine nucleotide-exchange protein 3 OS=Mus musculus GN=Arfgef3 PE=1 SV=1	Arfgef3	1.129	0.740707
Phosphatidylserine synthase 1 OS=Mus musculus GN=Ptdss1 PE=1 SV=1	Ptdss1	0.98	0.740853
SNARE-associated protein Snapin OS=Mus musculus GN=Snapin PE=1 SV=1	Snapin	0.954	0.740853
NEDD4 family-interacting protein 1 OS=Mus musculus GN=Ndfip1 PE=1 SV=1	Ndfip1	0.915	0.740853
2-methoxy-6-polyprenyl-1,4-benzoquinol methylase, mitochondrial OS=Mus musculus GN=Coq5 PE=1 SV=2	Coq5	1.174	0.740999
Phosphoethanolamine/phosphocholine phosphatase OS=Mus musculus GN=Phospho1 PE=1 SV=1	Phospho1	1.138	0.740999
Epidermal growth factor receptor substrate 15-like 1 OS=Mus musculus GN=Eps15l1 PE=1 SV=3	Eps15l1	1.137	0.740999
Leucine-rich repeat protein SHOC-2 OS=Mus musculus GN=Shoc2 PE=1 SV=2	Shoc2	1.135	0.740999
Apolipoprotein E OS=Mus musculus GN=Apoe PE=1 SV=2	Apoe	1.134	0.740999
Ras-related protein Rab-3C OS=Mus musculus GN=Rab3c PE=1 SV=1	Rab3c	1.127	0.740999
28S ribosomal protein S25, mitochondrial OS=Mus musculus GN=Mrps25 PE=1 SV=1	Mrps25	0.974	0.740999
Inositol hexakisphosphate and diphosphoinositol-pentakisphosphate kinase 2 OS=Mus musculus GN=Ppip5k2 PE=1 SV=3	Ppip5k2	0.961	0.740999
Exonuclease 3'-5' domain-containing protein 2 OS=Mus musculus GN=Exd2 PE=1 SV=2	Exd2	0.929	0.740999
Glycogen phosphorylase, brain form OS=Mus musculus GN=Pygb PE=1 SV=3	Pygb	1.13	0.741244
Tuberin OS=Mus musculus GN=Tsc2 PE=1 SV=1	Tsc2	0.968	0.742666
Ubiquitin carboxyl-terminal hydrolase MINDY-1 OS=Mus musculus GN=Mindy1 PE=1 SV=1	Mindy1	0.978	0.743433
Guanylate-binding protein 2 OS=Mus musculus GN=Gbp2 PE=1 SV=1	Gbp2	0.975	0.743433
Succinate--CoA ligase [ADP-forming] subunit beta, mitochondrial OS=Mus musculus GN=Sucla2 PE=1 SV=2	Sucla2	1.13	0.743661
Dedicator of cytokinesis protein 3 OS=Mus musculus GN=Dock3 PE=1 SV=1	Dock3	0.97	0.744525
SH3 domain-binding protein 1 OS=Mus musculus GN=Sh3bp1 PE=1 SV=1	Sh3bp1	1.22	0.745988
Phosphoglycerate kinase 2 OS=Mus musculus GN=Pgk2 PE=1 SV=4	Pgk2	1.134	0.745988
Sodium/potassium-transporting ATPase subunit beta-1 OS=Mus musculus GN=Atp1b1 PE=1 SV=1	Atp1b1	1.129	0.745988
Coiled-coil domain-containing protein 85B OS=Mus musculus GN=Ccdc85b PE=1 SV=1	Ccdc85b	1.175	0.746937
Striatin-4 OS=Mus musculus GN=Strn4 PE=1 SV=2	Strn4	1.166	0.746937
Hematological and neurological expressed 1 protein OS=Mus musculus GN=Hn1 PE=1 SV=3	Jpt1	1.238	0.747215
Retinol dehydrogenase 14 OS=Mus musculus GN=Rdh14 PE=1 SV=1	Rdh14	1.142	0.747215
AP-1 complex subunit gamma-like 2 OS=Mus musculus GN=Ap1g2 PE=1 SV=2	Ap1g2	1.139	0.747215
ADP-ribosylation factor 3 OS=Mus musculus GN=Arf3 PE=2 SV=2	Arf3	1.129	0.747215
Mitochondrial glutamate carrier 1 OS=Mus musculus GN=Slc25a22 PE=1 SV=1	Slc25a22	1.122	0.747215
Regulating synaptic membrane exocytosis protein 1 OS=Mus musculus GN=Rims1 PE=1 SV=2		0.982	0.747215
Oviduct-specific glycoprotein OS=Mus musculus GN=Ovgp1 PE=2 SV=1	Ovgp1	0.965	0.747215
Putative uncharacterized protein OS=Mus musculus GN=Rac1 PE=1 SV=1	Rac1	0.954	0.747215
Syntaxin-18 (Fragment) OS=Mus musculus GN=Stx18 PE=1 SV=1	Stx18	0.944	0.747215
Serpin H1 OS=Mus musculus GN=Serpinh1 PE=1 SV=3	Serpinh1	1.127	0.747386
GDNF family receptor alpha-1 OS=Mus musculus GN=Gfra1 PE=1 SV=1	Gfra1	0.961	0.747526
Phosphatase and actin regulator 4 (Fragment) OS=Mus musculus GN=Phactr4 PE=1 SV=1	Phactr4	1.184	0.748116
Calsyntenin-3 OS=Mus musculus GN=Clstn3 PE=1 SV=1	Clstn3	0.98	0.748116
Fatty-acid amide hydrolase 1 OS=Mus musculus GN=Faah PE=1 SV=1	Faah	0.961	0.748116
Transcriptional repressor NF-X1 OS=Mus musculus GN=Nfx1 PE=1 SV=1	Nfx1	0.956	0.748116
Coiled-coil domain-containing protein 93 OS=Mus musculus GN=Ccdc93 PE=1 SV=1	Ccdc93	0.947	0.748981
DNA repair protein-complementing XP-A cells homolog OS=Mus musculus GN=Xpa PE=1 SV=1	Xpa	1.126	0.74903
Sodium/potassium-transporting ATPase subunit beta-2 OS=Mus musculus GN=Atp1b2 PE=1 SV=2	Atp1b2	1.129	0.74955
CD109 antigen OS=Mus musculus GN=Cd109 PE=1 SV=1	Cd109	1.128	0.74955
MAP6 domain-containing protein 1 OS=Mus musculus GN=Map6d1 PE=1 SV=1	Map6d1	0.982	0.74955
Zinc finger C2HC domain-containing protein 1A OS=Mus musculus GN=Zc2hc1a PE=1 SV=1	Zc2hc1a	0.923	0.750186
14-3-3 protein epsilon OS=Mus musculus GN=Ywhae PE=1 SV=1	Ywhae	0.954	0.750363
Kinase OS=Mus musculus GN=Itpkb PE=1 SV=1	Itpkb	1.218	0.754058
Acyl-CoA dehydrogenase family member 9, mitochondrial OS=Mus musculus GN=Acad9 PE=1 SV=2	Acad9	1.127	0.754058
Sequestosome-1 OS=Mus musculus GN=Sqstm1 PE=1 SV=1	Sqstm1	0.983	0.75446
Chromosome-associated kinesin KIF4 OS=Mus musculus GN=Kif4 PE=1 SV=3	Kif4	0.954	0.754512
Hyaluronan and proteoglycan link protein 2 OS=Mus musculus GN=Hapln2 PE=1 SV=1	Hapln2	0.955	0.756753
Pre-mRNA-processing factor 17 OS=Mus musculus GN=Cdc40 PE=2 SV=1	Cdc40	0.949	0.757893
Ubiquitin-like domain-containing CTD phosphatase 1 OS=Mus musculus GN=Ublcp1 PE=1 SV=1	Ublcp1	1.155	0.75871
Neuron navigator 1 OS=Mus musculus GN=Nav1 PE=1 SV=2	Nav1	0.953	0.758972
Regulating synaptic membrane exocytosis protein 1 (Fragment) OS=Mus musculus GN=Rims1 PE=1 SV=3		0.944	0.7595
Programmed cell death protein 6 OS=Mus musculus GN=Pdcd6 PE=1 SV=2	Pdcd6	1.125	0.759708
3-mercaptopyruvate sulfurtransferase OS=Mus musculus GN=Mpst PE=1 SV=3		1.181	0.760141
Polypyrimidine tract-binding protein 2 OS=Mus musculus GN=Ptbp2 PE=1 SV=2	Ptbp2	1.127	0.762338
COX assembly mitochondrial protein homolog OS=Mus musculus GN=Cmc1 PE=1 SV=1	Cmc1	1.2	0.762986
Coiled-coil domain-containing protein 115 OS=Mus musculus GN=Ccdc115 PE=1 SV=1	Ccdc115	1.139	0.763233
Erlin-1 OS=Mus musculus GN=Erlin1 PE=1 SV=1	Erlin1	0.98	0.763492
Electron transfer flavoprotein subunit beta OS=Mus musculus GN=Etfb PE=1 SV=3	Etfb	1.132	0.764974
Beta-centractin OS=Mus musculus GN=Actr1b PE=1 SV=1	Actr1b	0.972	0.76552
Dolichyl-diphosphooligosaccharide--protein glycosyltransferase subunit STT3A OS=Mus musculus GN=Stt3a PE=1 SV=1	Stt3a	1.132	0.767086
Peptidyl-prolyl cis-trans isomerase FKBP8 OS=Mus musculus GN=Fkbp8 PE=1 SV=2	Fkbp8	1.112	0.767106
Thioredoxin domain-containing protein 12 OS=Mus musculus GN=Txndc12 PE=1 SV=1	Txndc12	1.14	0.767175
SH3 domain-binding glutamic acid-rich-like protein OS=Mus musculus GN=Sh3bgrl PE=1 SV=1	Sh3bgrl	1.135	0.767175
3-phosphoinositide-dependent protein kinase 1 OS=Mus musculus GN=Pdpk1 PE=1 SV=2	Pdpk1	0.973	0.767175
Ensconsin OS=Mus musculus GN=Map7 PE=1 SV=3	Map7	0.967	0.767175
26S proteasome non-ATPase regulatory subunit 7 OS=Mus musculus GN=Psmd7 PE=1 SV=2	Psmd7	0.947	0.767175
[Pyruvate dehydrogenase (acetyl-transferring)] kinase isozyme 1, mitochondrial OS=Mus musculus GN=Pdk1 PE=1 SV=2	Pdk1	1.157	0.768509
Vesicle-associated membrane protein 1 (Fragment) OS=Mus musculus GN=Vamp1 PE=1 SV=1	Vamp1	1.118	0.76861
Amyloid beta A4 protein OS=Mus musculus GN=App PE=1 SV=3	App	0.965	0.76861
Zinc finger protein 169 OS=Mus musculus GN=Zfp169 PE=3 SV=1	Zfp169	0.903	0.76861
Protein FAM114A2 OS=Mus musculus GN=Fam114a2 PE=1 SV=2	Fam114a2	0.92	0.772888
Centrosomal protein of 57 kDa OS=Mus musculus GN=Cep57 PE=1 SV=1	Cep57	1.217	0.772999
Cingulin OS=Mus musculus GN=Cgn PE=1 SV=1	Cgn	1.215	0.773812
Ankyrin repeat domain 50 (Fragment) OS=Mus musculus GN=Ankrd50 PE=1 SV=1	Ankrd50	0.973	0.773812
Cullin-4B OS=Mus musculus GN=Cul4b PE=1 SV=1	Cul4b	1.135	0.775186
Caspase-12 OS=Mus musculus GN=Casp12 PE=1 SV=1	Casp12	0.888	0.775473
CKLF-like MARVEL transmembrane domain-containing protein 5 OS=Mus musculus GN=Cmtm5 PE=1 SV=1	Cmtm5	0.966	0.776045
Phospholipid scramblase OS=Mus musculus GN=Plscr2 PE=1 SV=1	Plscr2	1.153	0.776487
Serine/threonine-protein kinase TAO3 OS=Mus musculus GN=Taok3 PE=1 SV=2	Taok3	0.954	0.776487
Inactive ubiquitin carboxyl-terminal hydrolase 53 OS=Mus musculus GN=Usp53 PE=1 SV=2	Usp53	0.952	0.776488
Serine/threonine-protein phosphatase PP1-gamma catalytic subunit OS=Mus musculus GN=Ppp1cc PE=1 SV=1	Ppp1cc	1.116	0.776593
Set1/Ash2 histone methyltransferase complex subunit ASH2 OS=Mus musculus GN=Ash2l PE=1 SV=1	Ash2l	0.95	0.777614
Intraflagellar transport protein 172 homolog OS=Mus musculus GN=Ift172 PE=1 SV=1	Ift172	0.952	0.777827
Nuclear pore complex protein Nup160 OS=Mus musculus GN=Nup160 PE=1 SV=2	Nup160	0.964	0.778393
Nephronectin OS=Mus musculus GN=Npnt PE=1 SV=1	Npnt	1.248	0.778545
Mitochondrial 2-oxoglutarate/malate carrier protein OS=Mus musculus GN=Slc25a11 PE=1 SV=3	Slc25a11	1.126	0.778545
26S proteasome non-ATPase regulatory subunit 10 OS=Mus musculus GN=Psmd10 PE=1 SV=3	Psmd10	0.87	0.780207
Microtubule-associated protein OS=Mus musculus GN=Mapt PE=1 SV=1	Mapt	1.28	0.780525
Nucleolar transcription factor 1 OS=Mus musculus GN=Ubtf PE=1 SV=1	Ubtf	1.133	0.78058
Coiled-coil domain-containing protein 90B, mitochondrial OS=Mus musculus GN=Ccdc90b PE=1 SV=1	Ccdc90b	1.203	0.781248
40S ribosomal protein S16 OS=Mus musculus GN=Rps16 PE=1 SV=4	Rps16	0.957	0.782404
Ral GTPase-activating protein subunit beta OS=Mus musculus GN=Ralgapb PE=1 SV=1	Ralgapb	0.956	0.782707
Adenylate kinase 4, mitochondrial OS=Mus musculus GN=Ak4 PE=1 SV=1	Ak4	1.139	0.783509
DENN domain-containing protein 5A OS=Mus musculus GN=Dennd5a PE=1 SV=1	Dennd5a	1.136	0.783509
DNA segment, Chr 15, Wayne State University 169, expressed, isoform CRA_a OS=Mus musculus GN=Arhgap39 PE=1 SV=1	Arhgap39	0.984	0.783509
Cytoplasmic dynein 1 intermediate chain 2 OS=Mus musculus GN=Dync1i2 PE=1 SV=1	Dync1i2	0.966	0.783509
Sorbin and SH3 domain-containing protein 1 OS=Mus musculus GN=Sorbs1 PE=1 SV=1	Sorbs1	0.979	0.783984
Ankyrin repeat domain-containing protein 24 OS=Mus musculus GN=Ankrd24 PE=2 SV=4	Ankrd24	1.151	0.784901
Glutathione S-transferase omega-1 OS=Mus musculus GN=Gsto1 PE=1 SV=2	Gsto1	1.113	0.786749
Adaptin ear-binding coat-associated protein 2 OS=Mus musculus GN=Necap2 PE=1 SV=1	Necap2	1.141	0.786749
Calcium-binding protein 1 OS=Mus musculus GN=Cabp1 PE=1 SV=1	Cabp1	1.135	0.786749
Keratin associated protein 9-1 OS=Mus musculus GN=Krtap9-1 PE=2 SV=1	Krtap9-1	0.893	0.786749
Sorting nexin-9 OS=Mus musculus GN=Snx9 PE=1 SV=1	Snx9	0.974	0.78697
7-dehydrocholesterol reductase OS=Mus musculus GN=Dhcr7 PE=1 SV=1	Dhcr7	0.952	0.787288
Rho GTPase-activating protein 26 OS=Mus musculus GN=Arhgap26 PE=1 SV=1	Arhgap26	1.139	0.787509
Girdin OS=Mus musculus GN=Ccdc88a PE=1 SV=2	Ccdc88a	1.124	0.787711
Rab11 family-interacting protein 4 OS=Mus musculus GN=Rab11fip4 PE=1 SV=1	Rab11fip4	0.914	0.787711
Clustered mitochondria protein homolog OS=Mus musculus GN=Cluh PE=1 SV=1	Cluh	0.863	0.787711
Methyltransferase-like protein OS=Mus musculus GN=Mettl16 PE=1 SV=1	Mettl16	1.205	0.792232
Pleckstrin homology domain-containing family A member 7 (Fragment) OS=Mus musculus GN=Plekha7 PE=1 SV=1	Plekha7	1.179	0.792232
Ubiquitin carboxyl-terminal hydrolase 21 OS=Mus musculus GN=Usp21 PE=3 SV=1		1.178	0.792232
ATP-binding cassette sub-family A member 2 OS=Mus musculus GN=Abca2 PE=1 SV=1	Abca2	1.173	0.792232
Ras-related protein Rab-6B OS=Mus musculus GN=Rab6b PE=1 SV=1	Rab6b	1.165	0.792232
WD repeat, SAM and U-box domain-containing protein 1 OS=Mus musculus GN=Wdsub1 PE=2 SV=1	Wdsub1	1.16	0.792232
Copine-4 OS=Mus musculus GN=Cpne4 PE=1 SV=1	Cpne4	1.14	0.792232
Cocaine- and amphetamine-regulated transcript protein OS=Mus musculus GN=Cartpt PE=1 SV=2	Cartpt	1.139	0.792232
Small nuclear ribonucleoprotein E OS=Mus musculus GN=Snrpe PE=1 SV=1	Snrpe	1.135	0.792232
Rab-like protein 6 OS=Mus musculus GN=Rabl6 PE=1 SV=2	Rabl6	1.134	0.792232
Prostaglandin reductase 2 OS=Mus musculus GN=Ptgr2 PE=1 SV=1	Ptgr2	1.133	0.792232
Carnitine O-acetyltransferase OS=Mus musculus GN=Crat PE=1 SV=1	Crat	1.131	0.792232
Immunoglobulin heavy variable V1-74 OS=Mus musculus GN=Ighv1-74 PE=4 SV=1	Ighv1-74	1.128	0.792232
Family with sequence similarity 71, member F2 (Fragment) OS=Mus musculus GN=Fam71f2 PE=4 SV=1	Garin1a	1.126	0.792232
ATP synthase subunit e, mitochondrial OS=Mus musculus GN=Atp5i PE=1 SV=2	Atp5me	1.124	0.792232
Calcium uptake protein 1, mitochondrial OS=Mus musculus GN=Micu1 PE=1 SV=1	Micu1	1.124	0.792232
Mitochondrial Rho GTPase 1 OS=Mus musculus GN=Rhot1 PE=1 SV=1	Rhot1	1.123	0.792232
Adenylate kinase 2, mitochondrial OS=Mus musculus GN=Ak2 PE=1 SV=5	Ak2	1.123	0.792232
Tubulin polymerization-promoting protein OS=Mus musculus GN=Tppp PE=1 SV=1	Tppp	1.122	0.792232
Protein FAM118A OS=Mus musculus GN=Fam118a PE=1 SV=1	Fam118a	1.122	0.792232
Protein farnesyltransferase/geranylgeranyltransferase type-1 subunit alpha OS=Mus musculus GN=Fnta PE=1 SV=1	Fnta	0.982	0.792232
Protein S100-A4 (Fragment) OS=Mus musculus GN=S100a4 PE=1 SV=1	S100a4	0.98	0.792232
Signal transducer and activator of transcription OS=Mus musculus GN=Stat1 PE=1 SV=1	Stat1	0.972	0.792232
Beta-2-microglobulin OS=Mus musculus GN=B2m PE=1 SV=2	B2m	0.972	0.792232
Protein SET (Fragment) OS=Mus musculus GN=Set PE=1 SV=1	Set	0.969	0.792232
E3 ubiquitin-protein ligase RNF213 OS=Mus musculus GN=Rnf213 PE=1 SV=1	Rnf213	0.96	0.792232
Tropomyosin alpha-1 chain OS=Mus musculus GN=Tpm1 PE=1 SV=1	Tpm1	0.958	0.792232
40S ribosomal protein S11 OS=Mus musculus GN=Rps11 PE=1 SV=3	Rps11	0.958	0.792232
Mitogen-activated protein kinase kinase kinase kinase 2 OS=Mus musculus GN=Map4k2 PE=1 SV=1	Map4k2	0.957	0.792232
Ganglioside-induced differentiation-associated protein 2 OS=Mus musculus GN=Gdap2 PE=1 SV=1	Gdap2	0.879	0.792232
Tubulin beta-5 chain (Fragment) OS=Mus musculus GN=Tubb5 PE=1 SV=8	Tubb5	0.866	0.792232
Rho-related BTB domain-containing protein 1 OS=Mus musculus GN=Rhobtb1 PE=1 SV=2	Rhobtb1	1.184	0.792267
Serine/threonine-protein kinase Nek9 OS=Mus musculus GN=Nek9 PE=1 SV=2	Nek9	0.97	0.792414
Mimitin, mitochondrial OS=Mus musculus GN=Ndufaf2 PE=1 SV=1	Ndufaf2	1.119	0.792439
DNA fragmentation factor subunit alpha OS=Mus musculus GN=Dffa PE=1 SV=2	Dffa	0.95	0.793042
Latexin OS=Mus musculus GN=Lxn PE=1 SV=2	Lxn	1.122	0.793113
Mitochondrial pyruvate carrier 2 OS=Mus musculus GN=Mpc2 PE=1 SV=1	Mpc2	1.127	0.794166
Putative adenosylhomocysteinase 3 OS=Mus musculus GN=Ahcyl2 PE=1 SV=1	Ahcyl2	1.113	0.794462
Macrophage-expressed gene 1 protein OS=Mus musculus GN=Mpeg1 PE=1 SV=1	Mpeg1	1.218	0.796285
Leptin receptor gene-related protein OS=Mus musculus GN=Leprot PE=1 SV=1	Leprot	1.139	0.796285
Excitatory amino acid transporter 2 OS=Mus musculus GN=Slc1a2 PE=1 SV=1	Slc1a2	1.123	0.796285
Putative RNA-binding protein Luc7-like 2 OS=Mus musculus GN=Luc7l2 PE=1 SV=1	Luc7l2	1.114	0.796285
Ubiquitin-like-conjugating enzyme ATG3 OS=Mus musculus GN=Atg3 PE=1 SV=1	Atg3	0.981	0.796285
3-ketoacyl-CoA thiolase B, peroxisomal OS=Mus musculus GN=Acaa1b PE=1 SV=1	Acaa1b	0.97	0.796285
MAP7 domain-containing protein 2 OS=Mus musculus GN=Map7d2 PE=1 SV=1	Map7d2	1.122	0.797208
Splicing factor, proline- and glutamine-rich OS=Mus musculus GN=Sfpq PE=1 SV=1	Sfpq	1.132	0.798178
Ras-related protein Rab-33B OS=Mus musculus GN=Rab33b PE=1 SV=1	Rab33b	1.143	0.799589
Nuclear pore complex protein Nup214 OS=Mus musculus GN=Nup214 PE=1 SV=2	Nup214	1.183	0.801339
Transmembrane protein 11, mitochondrial OS=Mus musculus GN=Tmem11 PE=1 SV=1	Tmem11	1.131	0.801339
Hippocalcin-like protein 1 OS=Mus musculus GN=Hpcal1 PE=1 SV=2	Hpcal1	1.123	0.802292
Sideroflexin-3 OS=Mus musculus GN=Sfxn3 PE=1 SV=1	Sfxn3	1.122	0.802292
RNA binding motif protein 15 OS=Mus musculus GN=Rbm15 PE=1 SV=1	Rbm15	0.951	0.802292
Gamma-tubulin complex component 6 OS=Mus musculus GN=Tubgcp6 PE=1 SV=1	Tubgcp6	0.944	0.802294
Glutathione S-transferase P 1 OS=Mus musculus GN=Gstp1 PE=1 SV=2	Gstp1	0.959	0.802677
Amphiphysin OS=Mus musculus GN=Amph PE=1 SV=1	Amph	1.122	0.805646
DnaJ homolog subfamily C member 5 (Fragment) OS=Mus musculus GN=Dnajc5 PE=1 SV=1	Dnajc5	1.121	0.805646
KN motif and ankyrin repeat domain-containing protein 3 OS=Mus musculus GN=Kank3 PE=1 SV=1	Kank3	0.97	0.805646
Gem-associated protein 5 OS=Mus musculus GN=Gemin5 PE=1 SV=1	Gemin5	0.988	0.806444
Synembryn-A OS=Mus musculus GN=Ric8a PE=1 SV=2	Ric8a	0.986	0.80702
pre-rRNA processing protein FTSJ3 OS=Mus musculus GN=Ftsj3 PE=1 SV=1	Ftsj3	0.963	0.80702
Uncharacterized protein OS=Mus musculus GN=Cd24a PE=4 SV=1	Cd24a	0.977	0.807207
26S protease regulatory subunit 4 OS=Mus musculus GN=Psmc1 PE=1 SV=1	Psmc1	0.969	0.807207
Armadillo repeat-containing protein 2 OS=Mus musculus GN=Armc2 PE=2 SV=3	Armc2	1.235	0.807354
Peroxisomal carnitine O-octanoyltransferase OS=Mus musculus GN=Crot PE=1 SV=1	Crot	1.241	0.808446
Tro protein OS=Mus musculus GN=Tro PE=1 SV=1	Tro	1.203	0.808711
RNA binding protein fox-1 homolog 3 OS=Mus musculus GN=Rbfox3 PE=1 SV=2	Rbfox3	1.143	0.809247
Arf-GAP with GTPase, ANK repeat and PH domain-containing protein 2 OS=Mus musculus GN=Agap2 PE=1 SV=1	Agap2	1.132	0.809835
Neurofilament light polypeptide OS=Mus musculus GN=Nefl PE=1 SV=5	Nefl	1.122	0.809835
39S ribosomal protein L4, mitochondrial OS=Mus musculus GN=Mrpl4 PE=1 SV=1	Mrpl4	1.119	0.809835
Cytochrome b5 type B OS=Mus musculus GN=Cyb5b PE=1 SV=1	Cyb5b	1.116	0.809835
Kinesin family member 13B OS=Mus musculus GN=Kif13b PE=1 SV=1	Kif13b	1.134	0.809839
Migration and invasion enhancer 1 OS=Mus musculus GN=Mien1 PE=1 SV=1	Mien1	1.131	0.809839
AP-3 complex subunit sigma-1 OS=Mus musculus GN=Ap3s1 PE=1 SV=2	Ap3s1	1.128	0.809839
NADH dehydrogenase [ubiquinone] 1 alpha subcomplex assembly factor 4 OS=Mus musculus GN=Ndufaf4 PE=1 SV=1	Ndufaf4	1.12	0.809839
SPARC OS=Mus musculus GN=Sparc PE=1 SV=1	Sparc	1.112	0.809839
Neural cell adhesion molecule 1 OS=Mus musculus GN=Ncam1 PE=1 SV=2	Ncam1	0.96	0.809839
AT-rich interactive domain-containing protein 1A OS=Mus musculus GN=Arid1a PE=1 SV=1	Arid1a	0.953	0.809839
Neurensin-1 OS=Mus musculus GN=Nrsn1 PE=1 SV=1	Nrsn1	1.243	0.810049
ATP-binding cassette sub-family A member 3 OS=Mus musculus GN=Abca3 PE=1 SV=1	Abca3	1.208	0.810049
Putative uncharacterized protein OS=Mus musculus GN=Rab23 PE=1 SV=1	Rab23	1.137	0.810049
Ribosome-recycling factor, mitochondrial OS=Mus musculus GN=Mrrf PE=1 SV=1	Mrrf	1.133	0.810049
FACT complex subunit SSRP1 OS=Mus musculus GN=Ssrp1 PE=1 SV=2	Ssrp1	0.978	0.810049
DNA-(apurinic or apyrimidinic site) lyase OS=Mus musculus GN=Apex1 PE=1 SV=2	Apex1	1.13	0.810528
Putative uncharacterized protein OS=Mus musculus GN=Slc25a27 PE=1 SV=1	Slc25a27	0.954	0.810827
Glucose-6-phosphate 1-dehydrogenase X OS=Mus musculus GN=G6pdx PE=1 SV=3	G6pdx	0.968	0.812449
Transportin-3 OS=Mus musculus GN=Tnpo3 PE=1 SV=1	Tnpo3	0.979	0.81257
Protein phosphatase 1 regulatory subunit 12A OS=Mus musculus GN=Ppp1r12a PE=1 SV=2	Ppp1r12a	0.969	0.813169
Claudin-11 OS=Mus musculus GN=Cldn11 PE=1 SV=1	Cldn11	0.96	0.813169
Ubiquitin-fold modifier 1 OS=Mus musculus GN=Ufm1 PE=1 SV=1	Ufm1	0.954	0.814389
Nucleoredoxin OS=Mus musculus GN=Nxn PE=1 SV=1	Nxn	1.181	0.814935
Myosin regulatory light polypeptide 9 OS=Mus musculus GN=Myl9 PE=1 SV=3	Myl9	1.145	0.814935
Inosine-5'-monophosphate dehydrogenase 2 OS=Mus musculus GN=Impdh2 PE=1 SV=2	Impdh2	1.137	0.814935
Plasma membrane calcium-transporting ATPase 1 OS=Mus musculus GN=Atp2b1 PE=1 SV=1	Atp2b1	1.12	0.814935
Acylglycerol kinase, mitochondrial OS=Mus musculus GN=Agk PE=1 SV=1	Agk	1.12	0.814935
Galectin-3 OS=Mus musculus GN=Lgals3 PE=1 SV=3	Lgals3	1.119	0.814935
Glutaminase kidney isoform, mitochondrial OS=Mus musculus GN=Gls PE=1 SV=1	Gls	1.115	0.814935
Glutamate decarboxylase 1 OS=Mus musculus GN=Gad1 PE=1 SV=2	Gad1	1.112	0.814935
Golgin subfamily A member 7 OS=Mus musculus GN=Golga7 PE=1 SV=1	Golga7	0.978	0.814935
Ferritin heavy chain OS=Mus musculus GN=Fth1 PE=1 SV=2	Fth1	0.961	0.815296
Phosphate carrier protein, mitochondrial OS=Mus musculus GN=Slc25a3 PE=1 SV=1	Slc25a3	1.121	0.816336
Complexin-1 OS=Mus musculus GN=Cplx1 PE=1 SV=1	Cplx1	1.121	0.816336
60S ribosomal protein L9 OS=Mus musculus GN=Rpl9 PE=2 SV=2	Rpl9	0.961	0.816508
TBC1 domain family member 9 OS=Mus musculus GN=Tbc1d9 PE=2 SV=2	Tbc1d9	1.16	0.817558
Sideroflexin-5 OS=Mus musculus GN=Sfxn5 PE=1 SV=2	Sfxn5	1.128	0.817558
Clathrin coat assembly protein AP180 OS=Mus musculus GN=Snap91 PE=1 SV=1	Snap91	1.12	0.817558
Nuclear pore complex-associated intranuclear coiled-coil protein TPR OS=Mus musculus GN=Tpr PE=1 SV=1	Tpr	0.989	0.817558
Engulfment and cell motility protein 1 OS=Mus musculus GN=Elmo1 PE=1 SV=2	Elmo1	0.979	0.817558
Ankyrin repeat domain-containing protein 13A OS=Mus musculus GN=Ankrd13a PE=1 SV=2	Ankrd13a	0.978	0.817558
Sulfide:quinone oxidoreductase, mitochondrial OS=Mus musculus GN=Sqrdl PE=1 SV=3	Sqor	0.973	0.817558
Lipoma-preferred partner homolog OS=Mus musculus GN=Lpp PE=1 SV=1	Lpp	0.928	0.817558
ATP synthase subunit s, mitochondrial OS=Mus musculus GN=Atp5s PE=1 SV=1	Dmac2l	1.125	0.817758
Protein kinase C OS=Mus musculus GN=Prkca PE=1 SV=1	Prkca	1.118	0.819836
Testis-specific serine/threonine-protein kinase 1 OS=Mus musculus GN=Tssk1b PE=1 SV=2	Tssk1b	0.955	0.819836
Dystrophia myotonica WD repeat-containing protein OS=Mus musculus GN=Dmwd PE=1 SV=3	Dmwd	0.963	0.820177
Lipoamide acyltransferase component of branched-chain alpha-keto acid dehydrogenase complex, mitochondrial OS=Mus musculus GN=Dbt PE=1 SV=2	Dbt	0.951	0.820177
GRB10-interacting GYF protein 1 OS=Mus musculus GN=Gigyf1 PE=1 SV=2	Gigyf1	1.188	0.8217
Protein Smaug homolog 2 OS=Mus musculus GN=Samd4b PE=1 SV=1	Samd4b	1.17	0.822777
Aspartate--tRNA ligase, cytoplasmic OS=Mus musculus GN=Dars PE=1 SV=2	Dars1	0.971	0.823235
Zinc finger CCHC domain-containing protein 18 OS=Mus musculus GN=Zcchc18 PE=2 SV=1	Zcchc18	0.99	0.82384
Calumenin OS=Mus musculus GN=Calu PE=1 SV=1	Calu	0.983	0.82384
Neural cell adhesion molecule 2 OS=Mus musculus GN=Ncam2 PE=1 SV=1	Ncam2	0.962	0.824285
Ribosomal biogenesis protein LAS1L OS=Mus musculus GN=Las1l PE=1 SV=1	Las1l	1.182	0.824725
Receptor-type tyrosine-protein phosphatase S OS=Mus musculus GN=Ptprs PE=1 SV=1	Ptprs	0.987	0.824937
Protein NDRG2 OS=Mus musculus GN=Ndrg2 PE=1 SV=1	Ndrg2	1.118	0.826515
Fatty acid desaturase 1 OS=Mus musculus GN=Fads1 PE=1 SV=1	Fads1	0.961	0.826627
Vacuolar protein sorting-associated protein 33A OS=Mus musculus GN=Vps33a PE=1 SV=2	Vps33a	0.973	0.826642
Translational activator of cytochrome c oxidase 1 OS=Mus musculus GN=Taco1 PE=1 SV=1	Taco1	1.165	0.827361
NEDD4-like E3 ubiquitin-protein ligase WWP2 OS=Mus musculus GN=Wwp2 PE=1 SV=1	Wwp2	1.162	0.827361
Protein C10 OS=Mus musculus GN=Grcc10 PE=1 SV=1	Grcc10	1.127	0.827396
Hepatocyte cell adhesion molecule OS=Mus musculus GN=Hepacam PE=1 SV=2	Hepacam	1.125	0.827396
Nascent polypeptide-associated complex subunit alpha, muscle-specific form OS=Mus musculus GN=Naca PE=1 SV=2	Naca	1.121	0.827396
Cadherin-2 OS=Mus musculus GN=Cdh2 PE=1 SV=2	Cdh2	0.97	0.827396
ATP-dependent RNA helicase DDX51 OS=Mus musculus GN=Ddx51 PE=1 SV=1	Ddx51	1.276	0.827752
Myelin-oligodendrocyte glycoprotein OS=Mus musculus GN=Mog PE=1 SV=1	Mog	0.962	0.827752
Receptor tyrosine-protein kinase erbB-3 OS=Mus musculus GN=Erbb3 PE=1 SV=2	Erbb3	0.943	0.827772
Bone morphogenetic protein receptor type-2 OS=Mus musculus GN=Bmpr2 PE=1 SV=1	Bmpr2	1.209	0.828337
Dysbindin OS=Mus musculus GN=Dtnbp1 PE=1 SV=1	Dtnbp1	1.114	0.828337
40S ribosomal protein S17 OS=Mus musculus GN=Rps17 PE=1 SV=2	Rps17	0.966	0.828337
Ras-like protein family member 11B OS=Mus musculus GN=Rasl11b PE=2 SV=1	Rasl11b	0.96	0.828337
Potassium voltage-gated channel subfamily H member 5 OS=Mus musculus GN=Kcnh5 PE=1 SV=3	Kcnh5	0.954	0.828337
Sp110 nuclear body protein OS=Mus musculus GN=Sp110 PE=1 SV=1	Sp110	0.887	0.828337
Vacuolar protein sorting-associated protein 8 homolog OS=Mus musculus GN=Vps8 PE=1 SV=1	Vps8	0.984	0.82863
U4/U6.U5 tri-snRNP-associated protein 2 OS=Mus musculus GN=Usp39 PE=1 SV=2	Usp39	1.133	0.828683
Protein kinase C theta type OS=Mus musculus GN=Prkcq PE=1 SV=1	Prkcq	1.121	0.828683
NF-kappa-B inhibitor beta (Fragment) OS=Mus musculus GN=Nfkbib PE=1 SV=8	Nfkbib	1.134	0.82963
UDP-glucose:glycoprotein glucosyltransferase 1 OS=Mus musculus GN=Uggt1 PE=1 SV=4	Uggt1	0.98	0.82963
Fibrous sheath-interacting protein 2 (Fragment) OS=Mus musculus GN=Fsip2 PE=1 SV=1	Fsip2	0.961	0.829761
Transforming acidic coiled-coil-containing protein 1 OS=Mus musculus GN=Tacc1 PE=1 SV=1	Tacc1	0.986	0.830042
Methylosome protein 50 OS=Mus musculus GN=Wdr77 PE=1 SV=1	Wdr77	0.97	0.830097
Redox-regulatory protein FAM213A OS=Mus musculus GN=Fam213a PE=1 SV=2	Prxl2a	1.114	0.831015
GTPase, IMAP family member 9 OS=Mus musculus GN=Gimap9 PE=1 SV=1	Gimap9	1.188	0.831016
Elongation factor 1-delta (Fragment) OS=Mus musculus GN=Eef1d PE=1 SV=1	Eef1d	1.122	0.831016
Serine/threonine-protein kinase MRCK beta OS=Mus musculus GN=Cdc42bpb PE=1 SV=2	Cdc42bpb	0.989	0.831016
Probable E3 ubiquitin-protein ligase makorin-2 OS=Mus musculus GN=Mkrn2 PE=1 SV=2	Mkrn2	0.976	0.831016
Microtubule-actin cross-linking factor 1 (Fragment) OS=Mus musculus GN=Macf1 PE=1 SV=1	Macf1	0.959	0.831016
Cytochrome P450 2S1 OS=Mus musculus GN=Cyp2s1 PE=1 SV=1	Cyp2s1	0.932	0.831016
Amyloid protein-binding protein 2 OS=Mus musculus GN=Appbp2 PE=2 SV=1	Appbp2	0.927	0.831016
Tankyrase-1 OS=Mus musculus GN=Tnks PE=1 SV=1	Tnks	0.902	0.831325
Vigilin OS=Mus musculus GN=Hdlbp PE=1 SV=1	Hdlbp	1.105	0.831645
MCG140437, isoform CRA_d OS=Mus musculus GN=Myh2 PE=1 SV=1	Myh2	0.989	0.833564
40S ribosomal protein S5 OS=Mus musculus GN=Rps5 PE=1 SV=1	Rps5	0.966	0.833564
Protein MON2 homolog OS=Mus musculus GN=Mon2 PE=1 SV=2	Mon2	0.979	0.833619
Eukaryotic translation initiation factor 3 subunit E OS=Mus musculus GN=Eif3e PE=1 SV=1	Eif3e	1.123	0.835178
NK-tumor recognition protein OS=Mus musculus GN=Nktr PE=1 SV=4	Nktr	0.956	0.835367
Polyribonucleotide nucleotidyltransferase 1, mitochondrial OS=Mus musculus GN=Pnpt1 PE=1 SV=1	Pnpt1	1.132	0.83618
Mitochondrial pyruvate carrier 1 OS=Mus musculus GN=Mpc1 PE=1 SV=1	Mpc1	1.11	0.83618
Nischarin OS=Mus musculus GN=Nisch PE=1 SV=2	Nisch	0.977	0.83618
Chromatin modification-related protein MEAF6 OS=Mus musculus GN=Meaf6 PE=1 SV=1	Meaf6	0.958	0.83618
Col4a5 protein OS=Mus musculus GN=Col4a5 PE=1 SV=1	Col4a5	0.955	0.83618
Nuclear autoantigen Sp-100 (Fragment) OS=Mus musculus GN=Sp100 PE=1 SV=1	Sp100	0.966	0.836373
DDB1- and CUL4-associated factor 11 (Fragment) OS=Mus musculus GN=Dcaf11 PE=1 SV=1		1.188	0.838055
Aldehyde dehydrogenase, mitochondrial OS=Mus musculus GN=Aldh2 PE=1 SV=1	Aldh2	1.123	0.838055
Disks large homolog 3 OS=Mus musculus GN=Dlg3 PE=1 SV=1	Dlg3	0.99	0.838055
E3 ubiquitin-protein ligase MARCH1 OS=Mus musculus GN=March1 PE=1 SV=2	Marchf1	0.962	0.838055
Putative ribosome-binding factor A, mitochondrial OS=Mus musculus GN=Rbfa PE=2 SV=1	Rbfa	0.954	0.838055
Rab proteins geranylgeranyltransferase component A 1 OS=Mus musculus GN=Chm PE=1 SV=1	Chm	0.89	0.838055
Granulins OS=Mus musculus GN=Grn PE=1 SV=2	Grn	0.991	0.839344
Peroxisomal membrane protein 11B OS=Mus musculus GN=Pex11b PE=1 SV=1	Pex11b	1.128	0.8395
FAD synthase OS=Mus musculus GN=Flad1 PE=1 SV=1	Flad1	1.127	0.8395
Ephexin-1 OS=Mus musculus GN=Ngef PE=1 SV=1	Ngef	0.988	0.8395
Ras/Rap GTPase-activating protein SynGAP OS=Mus musculus GN=Syngap1 PE=1 SV=1	Syngap1	0.974	0.8395
Pantothenate kinase 2 OS=Mus musculus GN=Pank2 PE=1 SV=1		0.961	0.8395
Coatomer subunit beta' OS=Mus musculus GN=Copb2 PE=1 SV=2	Copb2	0.992	0.839695
Ras-related protein Rab-6A OS=Mus musculus GN=Rab6a PE=1 SV=1	Rab6a	1.15	0.840554
Succinate--CoA ligase [GDP-forming] subunit beta, mitochondrial OS=Mus musculus GN=Suclg2 PE=1 SV=3	Suclg2	1.122	0.840554
Solute carrier family 25 member 46 OS=Mus musculus GN=Slc25a46 PE=1 SV=1	Slc25a46	1.116	0.840554
Cytosolic 5'-nucleotidase 3A OS=Mus musculus GN=Nt5c3a PE=1 SV=4	Nt5c3a	1.115	0.840554
Transmembrane protein 205 (Fragment) OS=Mus musculus GN=Tmem205 PE=1 SV=1	Tmem205	0.982	0.840554
Stathmin-2 OS=Mus musculus GN=Stmn2 PE=1 SV=1	Stmn2	0.979	0.840554
G-rich sequence factor 1 OS=Mus musculus GN=Grsf1 PE=1 SV=1	Grsf1	0.968	0.84136
Exosome complex component MTR3 OS=Mus musculus GN=Exosc6 PE=1 SV=1	Exosc6	0.96	0.84144
Putative ATP-dependent RNA helicase DHX57 OS=Mus musculus GN=Dhx57 PE=1 SV=2	Dhx57	0.981	0.842889
Zinc transporter ZIP6 OS=Mus musculus GN=Slc39a6 PE=1 SV=1	Slc39a6	1.197	0.843462
Mitochondrial thiamine pyrophosphate carrier (Fragment) OS=Mus musculus GN=Slc25a19 PE=1 SV=8	Slc25a19	1.149	0.843462
Signal-induced proliferation-associated 1-like protein 2 OS=Mus musculus GN=Sipa1l2 PE=1 SV=3	Sipa1l2	1.124	0.843462
Mitochondrial amidoxime reducing component 2 OS=Mus musculus GN=Marc2 PE=1 SV=1	Mtarc2	1.117	0.843462
Tyrosine-protein kinase OS=Mus musculus GN=Jak1 PE=1 SV=1	Jak1	0.989	0.843462
U6 snRNA-associated Sm-like protein LSm4 OS=Mus musculus GN=Lsm4 PE=1 SV=1	Lsm4	0.983	0.843462
Ubiquitin carboxyl-terminal hydrolase 30 (Fragment) OS=Mus musculus GN=Usp30 PE=1 SV=1	Usp30	0.966	0.843462
26S proteasome non-ATPase regulatory subunit 4 (Fragment) OS=Mus musculus GN=Psmd4 PE=1 SV=1	Psmd4	0.957	0.843462
Myotubularin-related protein 12 OS=Mus musculus GN=Mtmr12 PE=1 SV=1	Mtmr12	0.937	0.843462
Inositol (Myo)-1(Or 4)-monophosphatase 1 OS=Mus musculus GN=Impa1 PE=1 SV=1	Impa1	0.974	0.845694
Tripartite motif-containing protein 26 (Fragment) OS=Mus musculus GN=Trim26 PE=1 SV=1	Trim26	1.23	0.846579
Voltage-dependent L-type calcium channel subunit beta-3 OS=Mus musculus GN=Cacnb3 PE=1 SV=2	Cacnb3	1.211	0.846579
Guanine deaminase OS=Mus musculus GN=Gda PE=1 SV=1	Gda	1.16	0.846579
Golgi reassembly-stacking protein 2 OS=Mus musculus GN=Gorasp2 PE=1 SV=1	Gorasp2	1.124	0.846579
Coiled-coil domain-containing protein 177 OS=Mus musculus GN=Ccdc177 PE=1 SV=1	Ccdc177	1.123	0.846579
Numb protein OS=Mus musculus GN=Numb PE=1 SV=1	Numb	1.122	0.846579
Receptor expression-enhancing protein OS=Mus musculus GN=Reep5 PE=1 SV=1	Reep5	1.121	0.846579
Synaptotagmin II OS=Mus musculus GN=Syt2 PE=1 SV=1	Syt2	1.116	0.846579
Vesicle-associated membrane protein-associated protein B OS=Mus musculus GN=Vapb PE=1 SV=3	Vapb	1.114	0.846579
Leucine-rich repeat flightless-interacting protein 1 OS=Mus musculus GN=Lrrfip1 PE=1 SV=2	Lrrfip1	0.991	0.846579
Calcium homeostasis endoplasmic reticulum protein OS=Mus musculus GN=Cherp PE=1 SV=2	Cherp	0.981	0.846579
HCLS1-associated protein X-1 OS=Mus musculus GN=Hax1 PE=1 SV=1	Hax1	0.974	0.846579
BET1-like protein OS=Mus musculus GN=Bet1l PE=4 SV=1	Bet1l	0.973	0.846579
Dedicator of cytokinesis protein 11 OS=Mus musculus GN=Dock11 PE=1 SV=1	Dock11	0.894	0.846579
Uncharacterized protein KIAA1841 OS=Mus musculus GN=Kiaa1841 PE=1 SV=2	Sanbr	0.968	0.846707
Fatty acid desaturase 2-like protein FADS2P1 OS=Mus musculus GN=Fads2p1 PE=2 SV=1	Fads2b	0.99	0.847052
Cadherin-4 OS=Mus musculus GN=Cdh4 PE=2 SV=1	Cdh4	1.166	0.847307
PDZ and LIM domain protein 7 OS=Mus musculus GN=Pdlim7 PE=1 SV=1	Pdlim7	1.165	0.847307
Integrator complex subunit 7 OS=Mus musculus GN=Ints7 PE=1 SV=1	Ints7	1.163	0.847307
Signal peptidase complex catalytic subunit SEC11 OS=Mus musculus GN=Sec11a PE=1 SV=1	Sec11a	1.148	0.847307
Selenium-binding protein 2 OS=Mus musculus GN=Selenbp2 PE=1 SV=2	Selenbp2	1.133	0.847307
PEST proteolytic signal-containing nuclear protein OS=Mus musculus GN=Pcnp PE=1 SV=1	Pcnp	1.131	0.847307
Acylphosphatase-2 OS=Mus musculus GN=Acyp2 PE=1 SV=2	Acyp2	1.118	0.847307
Eukaryotic translation initiation factor 4H OS=Mus musculus GN=Eif4h PE=1 SV=3	Eif4h	1.116	0.847307
Mitochondrial import inner membrane translocase subunit Tim9 OS=Mus musculus GN=Timm9 PE=1 SV=1	Timm9	1.115	0.847307
Protein S100-A10 OS=Mus musculus GN=S100a10 PE=1 SV=2	S100a10	1.114	0.847307
WD repeat-containing protein 41 OS=Mus musculus GN=Wdr41 PE=1 SV=1	Wdr41	0.988	0.847307
Rho guanine nucleotide exchange factor 2 OS=Mus musculus GN=Arhgef2 PE=1 SV=1	Arhgef2	0.983	0.847307
Putative hydrolase RBBP9 OS=Mus musculus GN=Rbbp9 PE=1 SV=2	Rbbp9	0.983	0.847307
Metabotropic glutamate receptor 5 OS=Mus musculus GN=Grm5 PE=1 SV=1	Grm5	0.976	0.847307
Ubiquitin-like protein ISG15 OS=Mus musculus GN=Isg15 PE=1 SV=4	Isg15	0.976	0.847307
40S ribosomal protein S14 OS=Mus musculus GN=Rps14 PE=1 SV=3	Rps14	0.974	0.847307
Son of sevenless homolog 1 OS=Mus musculus GN=Sos1 PE=1 SV=2	Sos1	0.974	0.847307
Tripartite motif-containing protein 46 OS=Mus musculus GN=Trim46 PE=1 SV=1	Trim46	0.974	0.847307
Uncharacterized protein OS=Mus musculus GN=Rpl23a-ps3 PE=3 SV=1		0.965	0.847307
Receptor-type tyrosine-protein phosphatase T OS=Mus musculus GN=Ptprt PE=1 SV=1	Ptprt	0.963	0.847307
Immunoglobulin-like domain-containing receptor 2 OS=Mus musculus GN=Ildr2 PE=1 SV=2	Ildr2	0.94	0.847307
Structural maintenance of chromosomes protein 2 OS=Mus musculus GN=Smc2 PE=1 SV=2	Smc2	0.907	0.847307
Transmembrane protein 260 OS=Mus musculus GN=Tmem260 PE=2 SV=2	Tmem260	1.166	0.847984
Solute carrier family 15 member 3 OS=Mus musculus GN=Slc15a3 PE=2 SV=1	Slc15a3	1.13	0.847984
Zinc transporter ZIP12 OS=Mus musculus GN=Slc39a12 PE=1 SV=1	Slc39a12	1.118	0.847984
28S ribosomal protein S17, mitochondrial OS=Mus musculus GN=Mrps17 PE=1 SV=1	Mrps17	0.989	0.847984
Dynein light chain Tctex-type 3 OS=Mus musculus GN=Dynlt3 PE=1 SV=1	Dynlt3	0.966	0.847984
Sodium-coupled neutral amino acid transporter 2 OS=Mus musculus GN=Slc38a2 PE=1 SV=1	Slc38a2	0.986	0.848232
Serine protease HTRA1 OS=Mus musculus GN=Htra1 PE=1 SV=2	Htra1	0.977	0.848571
Mitochondrial import inner membrane translocase subunit Tim17-B OS=Mus musculus GN=Timm17b PE=1 SV=1	Timm17b	1.161	0.850587
Galactocerebrosidase OS=Mus musculus GN=Galc PE=1 SV=2	Galc	0.982	0.850587
SWI/SNF-related matrix-associated actin-dependent regulator of chromatin subfamily A member 5 OS=Mus musculus GN=Smarca5 PE=1 SV=1	Smarca5	0.978	0.850587
Dickkopf-related protein 3 OS=Mus musculus GN=Dkk3 PE=2 SV=1	Dkk3	0.968	0.850587
Phytanoyl-CoA dioxygenase domain-containing protein 1 OS=Mus musculus GN=Phyhd1 PE=1 SV=1	Phyhd1	1.142	0.851239
Golgi-associated plant pathogenesis-related protein 1 OS=Mus musculus GN=Glipr2 PE=1 SV=3	Glipr2	0.972	0.851239
Ribosomal RNA small subunit methyltransferase NEP1 OS=Mus musculus GN=Emg1 PE=1 SV=1	Emg1	1.199	0.852621
Gamma-2-syntrophin OS=Mus musculus GN=Sntg2 PE=4 SV=1	Sntg2	1.197	0.852621
Sn1-specific diacylglycerol lipase alpha OS=Mus musculus GN=Dagla PE=1 SV=2	Dagla	1.161	0.852621
F-box only protein 2 OS=Mus musculus GN=Fbxo2 PE=1 SV=1	Fbxo2	1.117	0.852621
ATP-dependent RNA helicase DDX19A OS=Mus musculus GN=Ddx19a PE=1 SV=2	Ddx19a	1.116	0.852621
AP2-associated protein kinase 1 OS=Mus musculus GN=Aak1 PE=1 SV=2	Aak1	1.113	0.852621
BCL2/adenovirus E1B 19 kDa protein-interacting protein 2 OS=Mus musculus GN=Bnip2 PE=1 SV=1	Bnip2	0.974	0.852621
NF-kappa-B inhibitor-interacting Ras-like protein 1 OS=Mus musculus GN=Nkiras1 PE=1 SV=1	Nkiras1	0.972	0.852621
RanBP-type and C3HC4-type zinc finger-containing protein 1 OS=Mus musculus GN=Rbck1 PE=1 SV=2	Rbck1	0.963	0.852621
Bone morphogenetic protein receptor type-1A OS=Mus musculus GN=Bmpr1a PE=2 SV=1	Bmpr1a	0.957	0.852621
Dixin OS=Mus musculus GN=Dixdc1 PE=1 SV=1	Dixdc1	1.139	0.852719
28S ribosomal protein S21, mitochondrial OS=Mus musculus GN=Mrps21 PE=1 SV=1	Mrps21	1.129	0.852719
Nuclear pore complex protein Nup88 OS=Mus musculus GN=Nup88 PE=1 SV=1	Nup88	1.129	0.852719
Protein tweety homolog 3 OS=Mus musculus GN=Ttyh3 PE=1 SV=1	Ttyh3	0.964	0.852719
Molybdopterin synthase catalytic subunit (Fragment) OS=Mus musculus GN=Mocs2 PE=1 SV=2	Mocs2	0.942	0.852719
Ankyrin repeat domain-containing protein SOWAHC OS=Mus musculus GN=Sowahc PE=1 SV=2	Sowahc	0.893	0.852719
Golgi integral membrane protein 4 OS=Mus musculus GN=Golim4 PE=1 SV=1	Golim4	1.225	0.853023
Netrin-G2 OS=Mus musculus GN=Ntng2 PE=1 SV=1	Ntng2	1.143	0.853023
RING finger protein 214 OS=Mus musculus GN=Rnf214 PE=1 SV=1	Rnf214	1.122	0.853023
Phosphatidylserine decarboxylase proenzyme, mitochondrial OS=Mus musculus GN=Pisd PE=2 SV=1	Pisd	1.122	0.853023
DnaJ homolog subfamily C member 9 OS=Mus musculus GN=Dnajc9 PE=1 SV=2	Dnajc9	1.12	0.853023
Dystrophin OS=Mus musculus GN=Dmd PE=1 SV=3	Dmd	1.118	0.853023
Calcium uptake protein 3, mitochondrial OS=Mus musculus GN=Micu3 PE=2 SV=2	Micu3	1.114	0.853023
Palmitoyltransferase ZDHHC9 OS=Mus musculus GN=Zdhhc9 PE=2 SV=1	Zdhhc9	0.992	0.853023
Putative uncharacterized protein OS=Mus musculus GN=Tfg PE=1 SV=1	Tfg	0.988	0.853023
E3 ubiquitin-protein ligase HUWE1 OS=Mus musculus GN=Huwe1 PE=1 SV=5	Huwe1	0.986	0.853023
Protein NOV homolog OS=Mus musculus GN=Nov PE=1 SV=1	Ccn3	0.983	0.853023
Active breakpoint cluster region-related protein OS=Mus musculus GN=Abr PE=1 SV=1	Abr	0.98	0.853023
Lupus La protein homolog OS=Mus musculus GN=Ssb PE=1 SV=1	Ssb	0.978	0.853023
Signal peptidase complex subunit 1 OS=Mus musculus GN=Spcs1 PE=1 SV=1	Spcs1	0.978	0.853023
Probable ATP-dependent RNA helicase DDX58 (Fragment) OS=Mus musculus GN=Ddx58 PE=1 SV=1	Rigi	0.969	0.853023
Protein S100-A13 OS=Mus musculus GN=S100a13 PE=1 SV=1	S100a13	0.965	0.853023
T-cell immunomodulatory protein OS=Mus musculus GN=Itfg1 PE=1 SV=2	Itfg1	0.965	0.853023
Neuritin OS=Mus musculus GN=Nrn1 PE=1 SV=1	Nrn1	0.956	0.853023
WD repeat-containing protein 3 OS=Mus musculus GN=Wdr3 PE=1 SV=1	Wdr3	1.164	0.853056
Mitogen-activated protein kinase kinase kinase 5 OS=Mus musculus GN=Map3k5 PE=1 SV=3	Map3k5	0.968	0.853056
Synapsin-1 OS=Mus musculus GN=Syn1 PE=1 SV=2	Syn1	1.114	0.853425
Potassium/sodium hyperpolarization-activated cyclic nucleotide-gated channel 1 OS=Mus musculus GN=Hcn1 PE=1 SV=1	Hcn1	1.121	0.853425
Signal transducer and transcription activator 6 OS=Mus musculus GN=Stat6 PE=1 SV=2	Stat6	0.967	0.854088
Histone-lysine N-methyltransferase SMYD3 OS=Mus musculus GN=Smyd3 PE=2 SV=1	Smyd3	0.968	0.85476
Acyl-CoA-binding domain-containing protein 5 OS=Mus musculus GN=Acbd5 PE=1 SV=1	Acbd5	0.991	0.85522
Angiomotin-like protein 1 OS=Mus musculus GN=Amotl1 PE=1 SV=2	Amotl1	0.962	0.855263
Interleukin enhancer-binding factor 3 OS=Mus musculus GN=Ilf3 PE=1 SV=1	Ilf3	1.115	0.85585
E3 ubiquitin-protein ligase TRIM9 OS=Mus musculus GN=Trim9 PE=1 SV=2	Trim9	1.125	0.856265
Ribonuclease UK114 OS=Mus musculus GN=Hrsp12 PE=1 SV=3	Rida	1.116	0.856265
Calcium/calmodulin-dependent 3',5'-cyclic nucleotide phosphodiesterase 1B OS=Mus musculus GN=Pde1b PE=1 SV=2	Pde1b	1.113	0.856265
Abl interactor 2 OS=Mus musculus GN=Abi2 PE=1 SV=1	Abi2	0.971	0.856265
Protein TANC1 OS=Mus musculus GN=Tanc1 PE=1 SV=1	Tanc1	0.958	0.856265
Nuclear receptor corepressor 1 OS=Mus musculus GN=Ncor1 PE=1 SV=1	Ncor1	1.252	0.856881
Polycystin-2 OS=Mus musculus GN=Pkd2 PE=1 SV=2	Pkd2	1.215	0.856881
LETM1 domain-containing protein 1 OS=Mus musculus GN=Letmd1 PE=1 SV=1	Letmd1	1.16	0.856881
FGFR1 oncogene partner 2 homolog OS=Mus musculus GN=Fgfr1op2 PE=1 SV=1	Fgfr1op2	1.146	0.856881
Progressive ankylosis protein OS=Mus musculus GN=Ankh PE=2 SV=1	Ankh	1.14	0.856881
Protein 4.1 (Fragment) OS=Mus musculus GN=Epb41 PE=1 SV=1	Epb41	1.123	0.856881
Protein lin-7 homolog B OS=Mus musculus GN=Lin7b PE=1 SV=2	Lin7b	1.123	0.856881
COBW domain-containing protein 1 OS=Mus musculus GN=Cbwd1 PE=1 SV=1	Zng1	1.116	0.856881
RIKEN cDNA 1700056E22 gene OS=Mus musculus GN=1700056E22Rik PE=4 SV=1	1700056E22Rik	1.104	0.856881
Ciliary neurotrophic factor receptor subunit alpha OS=Mus musculus GN=Cntfr PE=1 SV=2	Cntfr	0.987	0.856881
Transcriptional repressor CTCF OS=Mus musculus GN=Ctcf PE=1 SV=2	Ctcf	0.969	0.856881
Solute carrier family 23 member 2 (Fragment) OS=Mus musculus GN=Slc23a2 PE=1 SV=8	Slc23a2	0.963	0.856881
Pseudopodium-enriched atypical kinase 1 OS=Mus musculus GN=Peak1 PE=1 SV=1	Peak1	0.961	0.856881
Large neutral amino acids transporter small subunit 1 OS=Mus musculus GN=Slc7a5 PE=1 SV=2	Slc7a5	1.119	0.857319
MICOS complex subunit MIC13 OS=Mus musculus GN=Mic13 PE=1 SV=1	Micos13	1.115	0.857823
Armadillo repeat-containing protein 1 OS=Mus musculus GN=Armc1 PE=1 SV=1	Armc1	1.117	0.858343
Diacylglycerol kinase beta OS=Mus musculus GN=Dgkb PE=1 SV=2	Dgkb	0.992	0.860038
Capping protein (Actin filament) muscle Z-line, beta, isoform CRA_a OS=Mus musculus GN=Capzb PE=1 SV=1	Capzb	0.977	0.860038
Scaffold attachment factor B2 OS=Mus musculus GN=Safb2 PE=1 SV=2	Safb2	0.975	0.860038
Glutathione S-transferase Mu 7 OS=Mus musculus GN=Gstm7 PE=1 SV=1	Gstm7	0.979	0.860069
Proline/serine-rich coiled-coil protein 1 OS=Mus musculus GN=Psrc1 PE=1 SV=2	Psrc1	0.962	0.860069
Low density lipoprotein receptor adapter protein 1 OS=Mus musculus GN=Ldlrap1 PE=1 SV=3	Ldlrap1	0.943	0.860069
MAGUK p55 subfamily member 6 OS=Mus musculus GN=Mpp6 PE=1 SV=1	Pals2	1.121	0.860662
Protein LSM12 homolog OS=Mus musculus GN=Lsm12 PE=1 SV=1	Lsm12	1.13	0.861233
Isoaspartyl peptidase/L-asparaginase OS=Mus musculus GN=Asrgl1 PE=1 SV=1	Asrgl1	1.116	0.861233
Putative tyrosine-protein phosphatase auxilin OS=Mus musculus GN=Dnajc6 PE=1 SV=2	Dnajc6	1.109	0.861233
Protein polybromo-1 OS=Mus musculus GN=Pbrm1 PE=1 SV=4	Pbrm1	0.972	0.861233
Tyrosine-protein phosphatase non-receptor type 9 OS=Mus musculus GN=Ptpn9 PE=1 SV=2	Ptpn9	0.946	0.861233
Serine hydroxymethyltransferase, cytosolic (Fragment) OS=Mus musculus GN=Shmt1 PE=1 SV=1	Shmt1	1.176	0.862027
Exportin-7 OS=Mus musculus GN=Xpo7 PE=1 SV=1	Xpo7	0.981	0.862027
Epoxide hydrolase OS=Mus musculus GN=Ephx1 PE=1 SV=1	Ephx1	0.977	0.862027
C-Jun-amino-terminal kinase-interacting protein 3 OS=Mus musculus GN=Mapk8ip3 PE=1 SV=1	Mapk8ip3	0.976	0.862027
Keratin, type I cytoskeletal 10 OS=Mus musculus GN=Krt10 PE=1 SV=1	Krt10	0.976	0.862027
Gamma-aminobutyric acid receptor subunit beta-3 OS=Mus musculus GN=Gabrb3 PE=1 SV=1	Gabrb3	0.973	0.862027
Dual-specificity mitogen-activated protein kinase kinase 2 OS=Mus musculus GN=Map2k2 PE=1 SV=1	Map2k2	1.121	0.862287
Signal recognition particle receptor subunit alpha OS=Mus musculus GN=Srpra PE=1 SV=1	Srpra	0.97	0.862287
60S ribosomal protein L30 OS=Mus musculus GN=Rpl30 PE=1 SV=2	Rpl30	0.968	0.862287
Homer protein homolog 3 OS=Mus musculus GN=Homer3 PE=1 SV=2	Homer3	0.966	0.862287
Ubiquitin-associated protein 2 OS=Mus musculus GN=Ubap2 PE=1 SV=1	Ubap2	0.947	0.862287
Protein SMG7 OS=Mus musculus GN=Smg7 PE=2 SV=1	Smg7	0.936	0.862287
NHL repeat-containing protein 2 OS=Mus musculus GN=Nhlrc2 PE=1 SV=1	Nhlrc2	0.974	0.862575
Leucine-rich repeat and IQ domain-containing protein 1 OS=Mus musculus GN=Lrriq1 PE=2 SV=2	Lrriq1	1.137	0.862832
LIM domain-binding protein 3 OS=Mus musculus GN=Ldb3 PE=1 SV=1	Ldb3	1.26	0.863082
Coagulation factor X OS=Mus musculus GN=F10 PE=1 SV=1	F10	1.242	0.863082
Spermatogenesis-associated protein 6 OS=Mus musculus GN=Spata6 PE=1 SV=2	Spata6	1.225	0.863082
Casein kinase I isoform gamma-2 OS=Mus musculus GN=Csnk1g2 PE=1 SV=1	Csnk1g2	1.196	0.863082
Anoctamin-6 OS=Mus musculus GN=Ano6 PE=1 SV=1	Ano6	1.18	0.863082
Cortactin-binding protein 2 OS=Mus musculus GN=Cttnbp2 PE=1 SV=2	Cttnbp2	1.175	0.863082
Polyprenol reductase OS=Mus musculus GN=Srd5a3 PE=1 SV=2	Srd5a3	1.161	0.863082
Trichoplein keratin filament-binding protein OS=Mus musculus GN=Tchp PE=1 SV=2	Tchp	1.161	0.863082
Transmembrane protease serine 5 OS=Mus musculus GN=Tmprss5 PE=1 SV=1	Tmprss5	1.16	0.863082
TBC1 domain family member 22A OS=Mus musculus GN=Tbc1d22a PE=1 SV=3	Tbc1d22a	1.155	0.863082
Charged multivesicular body protein 6 OS=Mus musculus GN=Chmp6 PE=1 SV=2	Chmp6	1.153	0.863082
Wiskott-Aldrich syndrome protein family member 3 OS=Mus musculus GN=Wasf3 PE=1 SV=1	Wasf3	1.148	0.863082
Ataxin-7 OS=Mus musculus GN=Atxn7 PE=1 SV=2	Atxn7	1.147	0.863082
EF-hand calcium-binding domain-containing protein 14 OS=Mus musculus GN=Efcab14 PE=1 SV=1		1.134	0.863082
Integrin alpha-M OS=Mus musculus GN=Itgam PE=1 SV=2	Itgam	1.13	0.863082
Protein NipSnap homolog 1 OS=Mus musculus GN=Nipsnap1 PE=1 SV=1	Nipsnap1	1.125	0.863082
Microtubule cross-linking factor 1 OS=Mus musculus GN=Mtcl1 PE=1 SV=1	Mtcl1	1.122	0.863082
Cation-dependent mannose-6-phosphate receptor OS=Mus musculus GN=M6pr PE=1 SV=1	M6pr	1.121	0.863082
SUN domain-containing protein 1 OS=Mus musculus GN=Sun1 PE=1 SV=2	Sun1	1.121	0.863082
Golgi apparatus protein 1 (Fragment) OS=Mus musculus GN=Glg1 PE=1 SV=1	Glg1	1.12	0.863082
Cytohesin-1 (Fragment) OS=Mus musculus GN=Cyth1 PE=1 SV=1	Cyth1	1.12	0.863082
V-type proton ATPase subunit S1 OS=Mus musculus GN=Atp6ap1 PE=1 SV=1	Atp6ap1	1.117	0.863082
Synaptotagmin-7 OS=Mus musculus GN=Syt7 PE=1 SV=1	Syt7	1.113	0.863082
Creatine kinase B-type OS=Mus musculus GN=Ckb PE=1 SV=1	Ckb	1.112	0.863082
Poly(U)-binding-splicing factor PUF60 OS=Mus musculus GN=Puf60 PE=1 SV=2	Puf60	1.112	0.863082
Valacyclovir hydrolase OS=Mus musculus GN=Bphl PE=1 SV=1	Bphl	1.111	0.863082
IQ calmodulin-binding motif-containing protein 1 OS=Mus musculus GN=Iqcb1 PE=1 SV=2	Iqcb1	1.11	0.863082
rRNA/tRNA 2'-O-methyltransferase fibrillarin-like protein 1 OS=Mus musculus GN=Fbll1 PE=1 SV=1	Fbll1	1.102	0.863082
ADP-ribosylation factor-like protein 6-interacting protein 1 OS=Mus musculus GN=Arl6ip1 PE=1 SV=1	Arl6ip1	0.996	0.863082
Glycogen [starch] synthase, muscle OS=Mus musculus GN=Gys1 PE=1 SV=2	Gys1	0.995	0.863082
Synaptotagmin-11 OS=Mus musculus GN=Syt11 PE=1 SV=2	Syt11	0.995	0.863082
RIKEN cDNA 5830416A07, isoform CRA_c OS=Mus musculus GN=Zc3h18 PE=1 SV=1	Zc3h18	0.995	0.863082
Phosphorylase b kinase regulatory subunit alpha, skeletal muscle isoform OS=Mus musculus GN=Phka1 PE=1 SV=1	Phka1	0.995	0.863082
Tax1-binding protein 1 homolog OS=Mus musculus GN=Tax1bp1 PE=1 SV=2	Tax1bp1	0.994	0.863082
Phosphatidate phosphatase LPIN1 OS=Mus musculus GN=Lpin1 PE=1 SV=1	Lpin1	0.994	0.863082
Zinc finger protein 326 OS=Mus musculus GN=Zfp326 PE=1 SV=1	Zfp326	0.993	0.863082
AP-3 complex subunit mu-2 OS=Mus musculus GN=Ap3m2 PE=1 SV=1	Ap3m2	0.993	0.863082
Calmegin OS=Mus musculus GN=Clgn PE=1 SV=2	Clgn	0.988	0.863082
1-phosphatidylinositol 4,5-bisphosphate phosphodiesterase delta-1 OS=Mus musculus GN=Plcd1 PE=1 SV=2	Plcd1	0.987	0.863082
Protein FAM131B OS=Mus musculus GN=Fam131b PE=1 SV=1	Fam131b	0.986	0.863082
26S protease regulatory subunit 7 OS=Mus musculus GN=Psmc2 PE=1 SV=1	Psmc2	0.98	0.863082
Synaptophysin-like protein OS=Mus musculus GN=Sypl PE=1 SV=1	Sypl	0.98	0.863082
RNA-binding protein with serine-rich domain 1 OS=Mus musculus GN=Rnps1 PE=1 SV=1	Rnps1	0.976	0.863082
WD repeat-containing protein 61 OS=Mus musculus GN=Wdr61 PE=1 SV=1	Skic8	0.976	0.863082
Activating signal cointegrator 1 OS=Mus musculus GN=Trip4 PE=1 SV=2	Trip4	0.973	0.863082
Pre-mRNA-splicing factor SYF1 OS=Mus musculus GN=Xab2 PE=1 SV=1	Xab2	0.971	0.863082
Plexin-A1 OS=Mus musculus GN=Plxna1 PE=1 SV=1	Plxna1	0.97	0.863082
Histone H2B type 2-B OS=Mus musculus GN=Hist2h2bb PE=1 SV=3	Hist2h2bb	0.969	0.863082
60S ribosomal protein L31 OS=Mus musculus GN=Rpl31 PE=1 SV=1	Rpl31	0.968	0.863082
Pleckstrin homology domain-containing family M member 3 OS=Mus musculus GN=Plekhm3 PE=1 SV=1	Plekhm3	0.968	0.863082
Zinc finger FYVE domain-containing protein 1 OS=Mus musculus GN=Zfyve1 PE=1 SV=2	Zfyve1	0.967	0.863082
DnaJ homolog subfamily C member 27 OS=Mus musculus GN=Dnajc27 PE=1 SV=1	Dnajc27	0.965	0.863082
Phospholipid-transporting ATPase IC OS=Mus musculus GN=Atp8b1 PE=1 SV=2	Atp8b1	0.964	0.863082
40S ribosomal protein S27-like OS=Mus musculus GN=Rps27l PE=1 SV=3	Rps27l	0.962	0.863082
KN motif and ankyrin repeat domains 1 OS=Mus musculus GN=Kank1 PE=1 SV=1	Kank1	0.962	0.863082
Intraflagellar transport protein 43 homolog OS=Mus musculus GN=Ift43 PE=1 SV=2	Ift43	0.962	0.863082
Thrombospondin type-1 domain-containing protein 7A OS=Mus musculus GN=Thsd7a PE=1 SV=2	Thsd7a	0.96	0.863082
Polyadenylate-binding protein 2 OS=Mus musculus GN=Pabpn1 PE=4 SV=1	Pabpn1	1.111	0.863335
Transmembrane emp24 domain-containing protein 10 OS=Mus musculus GN=Tmed10 PE=1 SV=1	Tmed10	1.11	0.8635
Leucine-rich repeat-containing protein 7 OS=Mus musculus GN=Lrrc7 PE=1 SV=1	Lrrc7	1.131	0.863656
Myotrophin OS=Mus musculus GN=Mtpn PE=1 SV=2	Mtpn	1.121	0.863656
Succinate dehydrogenase [ubiquinone] flavoprotein subunit, mitochondrial OS=Mus musculus GN=Sdha PE=1 SV=1	Sdha	1.11	0.863656
Nuclear migration protein nudC OS=Mus musculus GN=Nudc PE=1 SV=1	Nudc	1.102	0.863656
Protein Niban OS=Mus musculus GN=Fam129a PE=1 SV=2	Niban1	0.994	0.863656
Dedicator of cytokinesis protein 4 OS=Mus musculus GN=Dock4 PE=1 SV=1	Dock4	0.972	0.863656
Actin, alpha cardiac muscle 1 OS=Mus musculus GN=Actc1 PE=1 SV=1	Actc1	0.97	0.863656
U3 small nucleolar RNA-associated protein 18 homolog OS=Mus musculus GN=Utp18 PE=1 SV=1	Utp18	0.97	0.863656
Ubiquitin carboxyl-terminal hydrolase 26 OS=Mus musculus GN=Usp26 PE=1 SV=2	Usp26	0.969	0.863656
WD repeat-containing protein 5 OS=Mus musculus GN=Wdr5 PE=1 SV=1	Wdr5	0.96	0.863656
Protein FAM110B OS=Mus musculus GN=Fam110b PE=1 SV=1	Fam110b	0.952	0.863656
39S ribosomal protein L10, mitochondrial OS=Mus musculus GN=Mrpl10 PE=1 SV=2	Mrpl10	1.118	0.863659
Proton myo-inositol cotransporter OS=Mus musculus GN=Slc2a13 PE=1 SV=2	Slc2a13	0.963	0.864236
Ras-related C3 botulinum toxin substrate 2 OS=Mus musculus GN=Rac2 PE=1 SV=1	Rac2	0.974	0.865018
ADP/ATP translocase 4 OS=Mus musculus GN=Slc25a31 PE=1 SV=1	Slc25a31	1.12	0.86523
cAMP-regulated phosphoprotein 19 OS=Mus musculus GN=Arpp19 PE=1 SV=1	Arpp19	1.12	0.86523
WW domain-binding protein 2 OS=Mus musculus GN=Wbp2 PE=1 SV=1	Wbp2	1.116	0.86523
26S proteasome non-ATPase regulatory subunit 11 OS=Mus musculus GN=Psmd11 PE=1 SV=3	Psmd11	1.112	0.86523
Deubiquitinating protein VCIP135 OS=Mus musculus GN=Vcpip1 PE=1 SV=1	Vcpip1	0.995	0.86523
UHRF1 (ICBP90)-binding protein 1 OS=Mus musculus GN=Uhrf1bp1 PE=1 SV=1	Uhrf1bp1	0.995	0.86523
Transmembrane glycoprotein NMB OS=Mus musculus GN=Gpnmb PE=1 SV=2	Gpnmb	0.992	0.86523
Transcription elongation factor SPT6 OS=Mus musculus GN=Supt6h PE=1 SV=2	Supt6h	0.988	0.86523
Acetolactate synthase-like protein OS=Mus musculus GN=Ilvbl PE=1 SV=1	Ilvbl	0.978	0.86523
Interferon-induced protein with tetratricopeptide repeats 1 OS=Mus musculus GN=Ifit1 PE=1 SV=2	Ifit1	0.975	0.86523
Phosphorylase b kinase gamma catalytic chain, liver/testis isoform OS=Mus musculus GN=Phkg2 PE=2 SV=2	Phkg2	0.972	0.86523
DENN domain-containing protein 4B OS=Mus musculus GN=Dennd4b PE=1 SV=2	Dennd4b	0.966	0.865418
Pre-mRNA-splicing factor ISY1 homolog OS=Mus musculus GN=Isy1 PE=1 SV=2	Isy1	0.95	0.865418
Regulation of nuclear pre-mRNA domain-containing protein 1A OS=Mus musculus GN=Rprd1a PE=1 SV=1	Rprd1a	0.966	0.865477
SH3-containing GRB2-like protein 3-interacting protein 1 (Fragment) OS=Mus musculus GN=Sgip1 PE=1 SV=1	Sgip1	1.124	0.86552
Leucine rich repeat (In FLII) interacting protein 1, isoform CRA_e OS=Mus musculus GN=Lrrfip1 PE=1 SV=1	Lrrfip1	0.98	0.865768
5'-AMP-activated protein kinase subunit gamma-2 OS=Mus musculus GN=Prkag2 PE=1 SV=2	Prkag2	0.996	0.865819
Eukaryotic elongation factor 2 kinase OS=Mus musculus GN=Eef2k PE=1 SV=1	Eef2k	1.159	0.865831
3-hydroxyisobutyrate dehydrogenase, mitochondrial OS=Mus musculus GN=Hibadh PE=1 SV=1	Hibadh	1.113	0.865831
Syntaxin-5 OS=Mus musculus GN=Stx5 PE=1 SV=3	Stx5	1.16	0.867669
Mitochondrial import inner membrane translocase subunit Tim23 OS=Mus musculus GN=Timm23 PE=1 SV=1	Timm23	1.16	0.867669
Integrin beta OS=Mus musculus GN=Itgb5 PE=1 SV=1	Itgb5	1.148	0.867669
TBC1 domain family member 5 OS=Mus musculus GN=Tbc1d5 PE=1 SV=2	Tbc1d5	1.147	0.867669
CDP-diacylglycerol--glycerol-3-phosphate 3-phosphatidyltransferase, mitochondrial OS=Mus musculus GN=Pgs1 PE=1 SV=1	Pgs1	1.146	0.867669
Activin receptor type-2A OS=Mus musculus GN=Acvr2a PE=1 SV=1	Acvr2a	1.119	0.867669
Quinone oxidoreductase OS=Mus musculus GN=Cryz PE=1 SV=1	Cryz	1.118	0.867669
Peptidyl-prolyl cis-trans isomerase NIMA-interacting 4 OS=Mus musculus GN=Pin4 PE=1 SV=1	Pin4	1.117	0.867669
Peptidyl-prolyl cis-trans isomerase F, mitochondrial OS=Mus musculus GN=Ppif PE=1 SV=1	Ppif	1.116	0.867669
PHD finger protein 14 OS=Mus musculus GN=Phf14 PE=1 SV=1		1.111	0.867669
Protein CLN8 OS=Mus musculus GN=Cln8 PE=1 SV=1	Cln8	1.111	0.867669
60S ribosomal protein L7a OS=Mus musculus GN=Rpl7a PE=1 SV=2	Rpl7a	1.11	0.867669
N-acyl-phosphatidylethanolamine-hydrolyzing phospholipase D OS=Mus musculus GN=Napepld PE=1 SV=1	Napepld	0.996	0.867669
ATP-sensitive inward rectifier potassium channel 10 OS=Mus musculus GN=Kcnj10 PE=1 SV=1	Kcnj10	0.981	0.867669
Ubiquitin domain-containing protein 1 OS=Mus musculus GN=Ubtd1 PE=2 SV=1	Ubtd1	0.981	0.867669
Prostaglandin E synthase 2 OS=Mus musculus GN=Ptges2 PE=1 SV=3	Ptges2	0.98	0.867669
Unconventional myosin-IXb OS=Mus musculus GN=Myo9b PE=1 SV=1		0.978	0.867669
Serine/threonine-protein kinase WNK2 OS=Mus musculus GN=Wnk2 PE=1 SV=1	Wnk2	0.977	0.867669
Putative uncharacterized protein OS=Mus musculus GN=Rbm6 PE=1 SV=1	Rbm6	0.967	0.867669
CDNA sequence BC017158 OS=Mus musculus GN=BC017158 PE=1 SV=1	Rusf1	0.966	0.867669
CUB and Sushi multiple domains 2 OS=Mus musculus GN=Csmd2 PE=1 SV=2	Csmd2	0.964	0.867669
Mitotic spindle assembly checkpoint protein MAD1 OS=Mus musculus GN=Mad1l1 PE=1 SV=1	Mad1l1	0.969	0.86796
Cleavage and polyadenylation specificity factor subunit 1 OS=Mus musculus GN=Cpsf1 PE=1 SV=1	Cpsf1	0.968	0.868137
Fumarate hydratase, mitochondrial OS=Mus musculus GN=Fh PE=1 SV=3	Fh	1.113	0.868773
Polyadenylate-binding protein OS=Mus musculus GN=Pabpc4 PE=1 SV=1	Pabpc4	0.979	0.868773
Phosphorylase b kinase regulatory subunit beta OS=Mus musculus GN=Phkb PE=1 SV=1	Phkb	0.98	0.868983
Complement C1q subcomponent subunit C OS=Mus musculus GN=C1qc PE=1 SV=2	C1qc	0.981	0.86928
Leucine-rich repeat-containing protein 59 OS=Mus musculus GN=Lrrc59 PE=1 SV=1	Lrrc59	0.996	0.870356
Synergin gamma OS=Mus musculus GN=Synrg PE=1 SV=1	Synrg	1.259	0.871118
Superoxide dismutase [Cu-Zn] OS=Mus musculus GN=Sod1 PE=1 SV=2	Sod1	1.109	0.871118
Vesicle-associated membrane protein-associated protein A OS=Mus musculus GN=Vapa PE=1 SV=2	Vapa	1.108	0.871118
CSC1-like protein 1 OS=Mus musculus GN=Tmem63a PE=1 SV=1	Tmem63a	0.997	0.871118
Neurexin-3-beta OS=Mus musculus GN=Nrxn3 PE=1 SV=1	Nrxn3	0.976	0.871118
Core-binding factor subunit beta OS=Mus musculus GN=Cbfb PE=1 SV=1	Cbfb	0.907	0.871118
Iron-sulfur cluster co-chaperone protein HscB, mitochondrial OS=Mus musculus GN=Hscb PE=1 SV=1	Hscb	1.157	0.871319
Glycylpeptide N-tetradecanoyltransferase 1 OS=Mus musculus GN=Nmt1 PE=1 SV=1	Nmt1	1.114	0.871319
Vacuolar fusion protein CCZ1 homolog OS=Mus musculus GN=Ccz1 PE=1 SV=1	Ccz1	0.979	0.871319
Ubiquitin-conjugating enzyme E2 H OS=Mus musculus GN=Ube2h PE=1 SV=1	Ube2h	0.966	0.871319
Gamma-glutamylcyclotransferase OS=Mus musculus GN=Ggct PE=1 SV=1	Ggct	1.117	0.872832
Hsp90 co-chaperone Cdc37-like 1 OS=Mus musculus GN=Cdc37l1 PE=1 SV=1	Cdc37l1	0.973	0.873322
Arrestin, beta 2 OS=Mus musculus GN=Arrb2 PE=1 SV=1	Arrb2	0.968	0.873322
Phosphodiesterase OS=Mus musculus GN=Pde4b PE=1 SV=1	Pde4b	0.981	0.874159
Fibroblast growth factor 1 OS=Mus musculus GN=Fgf1 PE=1 SV=1	Fgf1	1.117	0.874268
Tropomyosin alpha-3 chain OS=Mus musculus GN=Tpm3 PE=1 SV=1	Tpm3	0.979	0.874268
Phosphatidylserine synthase 2 OS=Mus musculus GN=Ptdss2 PE=1 SV=2	Ptdss2	0.975	0.874268
Ral GTPase-activating protein subunit alpha-1 OS=Mus musculus GN=Ralgapa1 PE=1 SV=1	Ralgapa1	0.969	0.874268
Gamma-aminobutyric acid receptor subunit gamma-2 OS=Mus musculus GN=Gabrg2 PE=1 SV=3	Gabrg2	1.118	0.874268
BTB/POZ domain-containing protein KCTD4 OS=Mus musculus GN=Kctd4 PE=1 SV=1	Kctd4	0.981	0.874268
Probable ATP-dependent RNA helicase DDX56 OS=Mus musculus GN=Ddx56 PE=2 SV=1	Ddx56	0.979	0.874268
Hyperpolarization-activated, cyclic nucleotide-gated K+ 4 OS=Mus musculus GN=Hcn4 PE=1 SV=1	Hcn4	1.108	0.87524
26S proteasome non-ATPase regulatory subunit 2 OS=Mus musculus GN=Psmd2 PE=1 SV=1	Psmd2	0.982	0.87597
ADP-ribosylation factor-like protein 2 OS=Mus musculus GN=Arl2 PE=1 SV=1	Arl2	0.995	0.876055
Glial fibrillary acidic protein OS=Mus musculus GN=Gfap PE=1 SV=4	Gfap	0.971	0.876055
Protein phosphatase 1E OS=Mus musculus GN=Ppm1e PE=1 SV=2	Ppm1e	1.116	0.87624
Tryptophan--tRNA ligase, cytoplasmic OS=Mus musculus GN=Wars PE=1 SV=2	Wars1	0.98	0.87624
Calcium/calmodulin-dependent protein kinase type II subunit alpha OS=Mus musculus GN=Camk2a PE=1 SV=2	Camk2a	0.971	0.87624
Citron Rho-interacting kinase OS=Mus musculus GN=Cit PE=1 SV=2	Cit	1.123	0.876427
Glucose-6-phosphate 1-dehydrogenase 2 OS=Mus musculus GN=G6pd2 PE=1 SV=3	G6pd2	1.24	0.876743
CUE domain-containing protein 1 OS=Mus musculus GN=Cuedc1 PE=1 SV=1	Cuedc1	1.254	0.876802
Phospholipid phosphatase-related protein type 3 OS=Mus musculus GN=Plppr3 PE=1 SV=1	Plppr3	1.169	0.877433
Coatomer subunit alpha OS=Mus musculus GN=Copa PE=1 SV=2	Copa	0.987	0.877433
Transcription factor PU.1 OS=Mus musculus GN=Spi1 PE=1 SV=2	Spi1	0.975	0.877433
Anaphase-promoting complex subunit 7 OS=Mus musculus GN=Anapc7 PE=1 SV=1	Anapc7	0.974	0.877433
40S ribosomal protein S18 OS=Mus musculus GN=Rps18 PE=1 SV=3	Rps18	0.972	0.877433
Glutathione peroxidase 7 OS=Mus musculus GN=Gpx7 PE=1 SV=1	Gpx7	0.956	0.877433
Family with sequence similarity 184, member A OS=Mus musculus GN=Fam184a PE=1 SV=1	Fam184a	0.899	0.877433
Translocator protein OS=Mus musculus GN=Tspo PE=1 SV=1	Tspo	0.988	0.878225
Platelet endothelial cell adhesion molecule OS=Mus musculus GN=Pecam1 PE=1 SV=1	Pecam1	1.164	0.878879
Acyl-coenzyme A thioesterase 13 OS=Mus musculus GN=Acot13 PE=1 SV=1	Acot13	0.995	0.878879
Multiple C2 domains, transmembrane 1 OS=Mus musculus GN=Mctp1 PE=1 SV=1	Mctp1	1.15	0.87986
Utrophin OS=Mus musculus GN=Utrn PE=1 SV=1	Utrn	1.111	0.87986
Uncharacterized protein C9orf78 homolog OS=Mus musculus PE=1 SV=2		1.15	0.879898
SR-related CTD-associated factor 11 OS=Mus musculus GN=Scaf11 PE=1 SV=1	Scaf11	1.147	0.879898
GRIP1-associated protein 1 OS=Mus musculus GN=Gripap1 PE=1 SV=1	Gripap1	1.11	0.879898
Acylphosphatase OS=Mus musculus GN=Acyp1 PE=1 SV=1	Acyp1	1.105	0.879898
Probable aminopeptidase NPEPL1 OS=Mus musculus GN=Npepl1 PE=1 SV=1	Npepl1	0.978	0.879898
Anaphase-promoting complex subunit CDC26 OS=Mus musculus GN=Cdc26 PE=1 SV=1	Cdc26	0.973	0.879898
Nostrin OS=Mus musculus GN=Nostrin PE=1 SV=2	Nostrin	0.912	0.879898
Nitric oxide synthase, brain OS=Mus musculus GN=Nos1 PE=1 SV=1	Nos1	1.25	0.880044
Probable G-protein coupled receptor 158 OS=Mus musculus GN=Gpr158 PE=1 SV=2	Gpr158	1.11	0.880772
Sialic acid binding Ig-like lectin 1, sialoadhesin, isoform CRA_b OS=Mus musculus GN=Siglec1 PE=1 SV=1	Siglec1	0.989	0.880772
Persulfide dioxygenase ETHE1, mitochondrial OS=Mus musculus GN=Ethe1 PE=1 SV=2	Ethe1	1.116	0.880999
RNA-binding protein Raly OS=Mus musculus GN=Raly PE=1 SV=3	Raly	0.981	0.880999
DnaJ homolog subfamily B member 6 OS=Mus musculus GN=Dnajb6 PE=1 SV=4	Dnajb6	0.98	0.880999
Pinin OS=Mus musculus GN=Pnn PE=1 SV=1	Pnn	0.983	0.881151
FXYD domain-containing ion transport regulator 7 OS=Mus musculus GN=Fxyd7 PE=1 SV=1	Fxyd7	1.11	0.881962
eIF-2-alpha kinase activator GCN1 OS=Mus musculus GN=Gcn1 PE=1 SV=1	Gcn1	1.118	0.882381
6.8 kDa mitochondrial proteolipid OS=Mus musculus GN=Mp68 PE=1 SV=1	Atp5mpl	1.112	0.883233
Protein phosphatase 1 regulatory subunit 12C OS=Mus musculus GN=Ppp1r12c PE=1 SV=1	Ppp1r12c	0.997	0.883296
60S ribosomal protein L19 OS=Mus musculus GN=Rpl19 PE=1 SV=1	Rpl19	0.985	0.883296
Breast cancer anti-estrogen resistance protein 1 OS=Mus musculus GN=Bcar1 PE=1 SV=2	Bcar1	1.142	0.883398
Phosphatidylinositol 4,5-bisphosphate 3-kinase catalytic subunit beta isoform OS=Mus musculus GN=Pik3cb PE=1 SV=2	Pik3cb	1.14	0.883398
Ubiquitin-associated domain-containing protein 2 OS=Mus musculus GN=Ubac2 PE=1 SV=1	Ubac2	1.123	0.883398
Mitochondrial 10-formyltetrahydrofolate dehydrogenase OS=Mus musculus GN=Aldh1l2 PE=1 SV=1	Aldh1l2	1.118	0.883398
Ras GTPase-activating protein-binding protein 1 OS=Mus musculus GN=G3bp1 PE=1 SV=1	G3bp1	1.116	0.883398
Splicing factor 3B subunit 5 OS=Mus musculus GN=Sf3b5 PE=1 SV=1	Sf3b5	1.115	0.883398
Pericentriolar material 1 protein OS=Mus musculus GN=Pcm1 PE=1 SV=2	Pcm1	1.11	0.883398
Nucleobindin 1, isoform CRA_b OS=Mus musculus GN=Nucb1 PE=1 SV=1	Nucb1	1.109	0.883398
Acyl-Coenzyme A dehydrogenase family, member 8 OS=Mus musculus GN=Acad8 PE=1 SV=1	Acad8	1.108	0.883398
Charged multivesicular body protein 3 OS=Mus musculus GN=Chmp3 PE=1 SV=3	Chmp3	1.107	0.883398
Phosphomannomutase 2 OS=Mus musculus GN=Pmm2 PE=1 SV=1	Pmm2	0.985	0.883398
Probable palmitoyltransferase ZDHHC20 OS=Mus musculus GN=Zdhhc20 PE=1 SV=1	Zdhhc20	0.98	0.883398
60S ribosomal protein L7 OS=Mus musculus GN=Rpl7 PE=1 SV=2	Rpl7	0.973	0.883398
Protein kinase C delta type OS=Mus musculus GN=Prkcd PE=1 SV=3	Prkcd	0.972	0.883398
Guanine nucleotide-binding protein G(t) subunit alpha-1 OS=Mus musculus GN=Gnat1 PE=1 SV=3	Gnat1	0.972	0.883398
Nucleobindin-2 OS=Mus musculus GN=Nucb2 PE=1 SV=2	Nucb2	0.968	0.883398
Single-stranded DNA-binding protein OS=Mus musculus GN=Ssbp1 PE=1 SV=1	Ssbp1	1.118	0.884392
Mitochondrial import receptor subunit TOM40B OS=Mus musculus GN=Tomm40l PE=1 SV=1	Tomm40l	1.136	0.884392
Transcription elongation factor A protein-like 5 OS=Mus musculus GN=Tceal5 PE=1 SV=1	Tceal5	1.118	0.884392
Myelin basic protein (Fragment) OS=Mus musculus GN=Mbp PE=1 SV=1		0.973	0.884392
Immunoglobulin heavy constant gamma 2C OS=Mus musculus GN=Ighg2c PE=1 SV=1		0.973	0.884392
Alpha-crystallin B chain OS=Mus musculus GN=Cryab PE=1 SV=2	Cryab	1.107	0.885601
Coiled-coil domain-containing protein 124 OS=Mus musculus GN=Ccdc124 PE=1 SV=1	Ccdc124	0.998	0.885601
Transcription elongation factor SPT5 OS=Mus musculus GN=Supt5h PE=1 SV=1	Supt5h	0.989	0.885601
MAGUK p55 subfamily member 3 OS=Mus musculus GN=Mpp3 PE=1 SV=1	Mpp3	0.975	0.886625
SH3 domain-binding protein 5-like OS=Mus musculus GN=Sh3bp5l PE=1 SV=1	Sh3bp5l	0.965	0.887563
Adenylate kinase isoenzyme 5 OS=Mus musculus GN=Ak5 PE=1 SV=2	Ak5	1.175	0.888094
Transmembrane protein 9B OS=Mus musculus GN=Tmem9b PE=1 SV=1	Tmem9b	1.114	0.888409
Ribosomal protein L3-like OS=Mus musculus GN=Rpl3l PE=1 SV=1	Rpl3l	0.995	0.888409
Mitochondrial carrier homolog 1 OS=Mus musculus GN=Mtch1 PE=1 SV=1	Mtch1	1.114	0.888413
Vacuolar ATPase assembly integral membrane protein Vma21 OS=Mus musculus GN=Vma21 PE=1 SV=1	Vma21	1.113	0.889294
Acetyl-CoA acetyltransferase, mitochondrial OS=Mus musculus GN=Acat1 PE=1 SV=1	Acat1	1.106	0.889294
Putative uncharacterized protein OS=Mus musculus GN=Taf15 PE=1 SV=1	Taf15	0.998	0.889294
MAP7 domain-containing protein 1 OS=Mus musculus GN=Map7d1 PE=1 SV=1	Map7d1	0.981	0.889294
Signal recognition particle 72 OS=Mus musculus GN=Srp72 PE=1 SV=1	Srp72	0.998	0.890551
SUMO-activating enzyme subunit 1 OS=Mus musculus GN=Sae1 PE=1 SV=1	Sae1	1.103	0.890598
V-type proton ATPase subunit F OS=Mus musculus GN=Atp6v1f PE=1 SV=2	Atp6v1f	1.1	0.890598
Dedicator of cytokinesis protein 10 OS=Mus musculus GN=Dock10 PE=1 SV=3		0.982	0.890598
Squamous cell carcinoma antigen recognized by T-cells 3 OS=Mus musculus GN=Sart3 PE=1 SV=1	Sart3	0.973	0.890598
Ubiquitin conjugation factor E4 A OS=Mus musculus GN=Ube4a PE=1 SV=1	Ube4a	0.973	0.890598
Calmodulin-regulated spectrin-associated protein 1 OS=Mus musculus GN=Camsap1 PE=1 SV=1	Camsap1	0.966	0.890598
ATP-dependent 6-phosphofructokinase, liver type OS=Mus musculus GN=Pfkl PE=1 SV=4	Pfkl	0.982	0.890986
3-oxo-5-alpha-steroid 4-dehydrogenase 1 OS=Mus musculus GN=Srd5a1 PE=4 SV=1	Srd5a1	1.099	0.891096
3'(2'),5'-bisphosphate nucleotidase 1 OS=Mus musculus GN=Bpnt1 PE=1 SV=2	Bpnt1	1.167	0.891549
Kinesin-like protein KIF1A OS=Mus musculus GN=Kif1a PE=1 SV=1	Kif1a	0.975	0.891549
CD63 antigen OS=Mus musculus GN=Cd63 PE=1 SV=2	Cd63	1.109	0.892143
Sprouty-related, EVH1 domain-containing protein 2 OS=Mus musculus GN=Spred2 PE=1 SV=1	Spred2	1.174	0.892698
ER membrane protein complex subunit 3 OS=Mus musculus GN=Emc3 PE=1 SV=3	Emc3	0.997	0.892698
High mobility group nucleosome-binding domain-containing protein 5 OS=Mus musculus GN=Hmgn5 PE=1 SV=2	Hmgn5	1.238	0.893756
Guanine nucleotide-binding protein subunit alpha-14 OS=Mus musculus GN=Gna14 PE=1 SV=2	Gna14	1.147	0.893756
39S ribosomal protein L19, mitochondrial OS=Mus musculus GN=Mrpl19 PE=1 SV=1	Mrpl19	1.117	0.893756
Stress-induced-phosphoprotein 1 OS=Mus musculus GN=Stip1 PE=1 SV=1	Stip1	1.106	0.893756
39S ribosomal protein L44, mitochondrial OS=Mus musculus GN=Mrpl44 PE=1 SV=3	Mrpl44	1.103	0.893756
Cullin-5 OS=Mus musculus GN=Cul5 PE=1 SV=3	Cul5	0.997	0.893756
Elongator complex protein 2 OS=Mus musculus GN=Elp2 PE=1 SV=1	Elp2	0.994	0.893756
Endophilin-B1 OS=Mus musculus GN=Sh3glb1 PE=1 SV=1	Sh3glb1	0.992	0.893756
Nuclear cap-binding protein subunit 2 OS=Mus musculus GN=Ncbp2 PE=1 SV=1	Ncbp2	0.986	0.893756
Structural maintenance of chromosomes protein 3 OS=Mus musculus GN=Smc3 PE=1 SV=2	Smc3	0.985	0.893756
Histone H2A.J OS=Mus musculus GN=H2afj PE=1 SV=1	H2aj	0.983	0.893756
Filamin-C OS=Mus musculus GN=Flnc PE=1 SV=3	Flnc	0.974	0.893756
Heterogeneous nuclear ribonucleoproteins C1/C2 OS=Mus musculus GN=Hnrnpc PE=1 SV=1	Hnrnpc	0.974	0.893756
Myosin light polypeptide 6 OS=Mus musculus GN=Myl6 PE=1 SV=3	Myl6	0.974	0.893756
PDZ domain containing 8 OS=Mus musculus GN=Pdzd8 PE=1 SV=1	Pdzd8	0.97	0.893756
UV radiation resistance-associated protein (Fragment) OS=Mus musculus GN=Uvrag PE=1 SV=1	Uvrag	0.976	0.894451
ATP synthase subunit O, mitochondrial OS=Mus musculus GN=Atp5o PE=1 SV=1	Atp5po	1.105	0.894537
ADP-ribosylation factor-like protein 10 OS=Mus musculus GN=Arl10 PE=1 SV=2	Arl10	0.962	0.895361
Limbic system-associated membrane protein OS=Mus musculus GN=Lsamp PE=1 SV=1	Lsamp	1.105	0.89573
Secretory carrier-associated membrane protein 5 OS=Mus musculus GN=Scamp5 PE=1 SV=1	Scamp5	1.105	0.897395
cAMP-dependent protein kinase catalytic subunit beta OS=Mus musculus GN=Prkacb PE=1 SV=2	Prkacb	0.997	0.897599
Brain acid soluble protein 1 OS=Mus musculus GN=Basp1 PE=1 SV=3	Basp1	1.105	0.897737
Palmitoyltransferase ZDHHC17 OS=Mus musculus GN=Zdhhc17 PE=1 SV=2	Zdhhc17	1.122	0.898207
CBP80/20-dependent translation initiation factor OS=Mus musculus GN=Ctif PE=1 SV=2	Ctif	1.109	0.898207
40S ribosomal protein S9 OS=Mus musculus GN=Rps9 PE=1 SV=3	Rps9	0.974	0.898207
Ubiquitin carboxyl-terminal hydrolase 11 OS=Mus musculus GN=Usp11 PE=1 SV=4	Usp11	0.969	0.898207
Tau-tubulin kinase 1 OS=Mus musculus GN=Ttbk1 PE=1 SV=3	Ttbk1	1.211	0.898269
Spindlin-1 OS=Mus musculus GN=Spin1 PE=1 SV=2	Spin1	1.198	0.89907
Ribosome biogenesis regulatory protein homolog OS=Mus musculus GN=Rrs1 PE=1 SV=1	Rrs1	0.979	0.899577
NTF2-related export protein 2 OS=Mus musculus GN=Nxt2 PE=2 SV=1	Nxt2	0.969	0.899577
Staphylococcal nuclease domain-containing protein 1 OS=Mus musculus GN=Snd1 PE=1 SV=1	Snd1	1.104	0.899908
Neutral cholesterol ester hydrolase 1 OS=Mus musculus GN=Nceh1 PE=1 SV=1	Nceh1	0.979	0.899908
Inactive rhomboid protein 1 OS=Mus musculus GN=Rhbdf1 PE=1 SV=2	Rhbdf1	1.112	0.900038
Alpha-centractin OS=Mus musculus GN=Actr1a PE=1 SV=1	Actr1a	0.975	0.900121
Hematopoietic progenitor cell antigen CD34 OS=Mus musculus GN=Cd34 PE=1 SV=1	Cd34	1.118	0.900903
Oxysterol-binding protein-related protein 1 OS=Mus musculus GN=Osbpl1a PE=1 SV=2	Osbpl1a	1.001	0.900903
V-type proton ATPase subunit a OS=Mus musculus GN=Tcirg1 PE=1 SV=1	Tcirg1	0.988	0.900903
Cytochrome b-245 light chain OS=Mus musculus GN=Cyba PE=1 SV=3	Cyba	0.982	0.900903
Transmembrane prolyl 4-hydroxylase OS=Mus musculus GN=P4htm PE=1 SV=1	P4htm	0.976	0.900903
BAG family molecular chaperone regulator 4 OS=Mus musculus GN=Bag4 PE=1 SV=2	Bag4	0.96	0.900903
Chloride intracellular channel protein 1 OS=Mus musculus GN=Clic1 PE=1 SV=3	Clic1	1.116	0.902206
LMBR1 domain-containing protein 2 OS=Mus musculus GN=Lmbrd2 PE=1 SV=1	Lmbrd2	0.99	0.902868
Ena/VASP-like protein OS=Mus musculus GN=Evl PE=1 SV=1	Evl	1.112	0.90337
Microfibrillar-associated protein 1B OS=Mus musculus GN=Mfap1b PE=1 SV=1	Mfap1b	1	0.90337
Homeobox protein Hox-B6 OS=Mus musculus GN=Hoxb6 PE=1 SV=2	Hoxb6	0.974	0.90337
Mitogen-activated protein kinase kinase kinase 4 OS=Mus musculus GN=Map3k4 PE=1 SV=2	Map3k4	1.127	0.903397
Lipase maturation factor 1 OS=Mus musculus GN=Lmf1 PE=1 SV=1	Lmf1	0.98	0.903426
NFX1-type zinc finger-containing protein 1 OS=Mus musculus GN=Znfx1 PE=1 SV=3	Znfx1	0.967	0.903426
Choline/ethanolaminephosphotransferase 1 (Fragment) OS=Mus musculus GN=Cept1 PE=1 SV=1	Cept1	0.974	0.903564
Serine hydroxymethyltransferase OS=Mus musculus GN=Shmt2 PE=1 SV=1	Shmt2	1.233	0.903725
Uncharacterized protein C1orf43 homolog OS=Mus musculus PE=2 SV=1		1.164	0.903725
Dysferlin OS=Mus musculus GN=Dysf PE=1 SV=1	Dysf	1.155	0.903725
Protein-tyrosine kinase 2-beta OS=Mus musculus GN=Ptk2b PE=1 SV=2	Ptk2b	1.148	0.903725
Mitochondrial carnitine/acylcarnitine carrier protein OS=Mus musculus GN=Slc25a20 PE=1 SV=1	Slc25a20	1.113	0.903725
Heme-binding protein 2 OS=Mus musculus GN=Hebp2 PE=1 SV=1	Hebp2	1.113	0.903725
Microtubule-associated protein 9 OS=Mus musculus GN=Map9 PE=1 SV=2	Map9	1.113	0.903725
Calcium/calmodulin-dependent protein kinase type II subunit delta OS=Mus musculus GN=Camk2d PE=1 SV=1	Camk2d	1.104	0.903725
Calmodulin OS=Mus musculus GN=Calm1 PE=1 SV=2	Calm1	1.104	0.903725
Splicing factor U2AF 65 kDa subunit OS=Mus musculus GN=U2af2 PE=1 SV=3	U2af2	0.998	0.903725
Formin-like protein 2 (Fragment) OS=Mus musculus GN=Fmnl2 PE=1 SV=1		0.994	0.903725
Ragulator complex protein LAMTOR5 OS=Mus musculus GN=Lamtor5 PE=1 SV=1	Lamtor5	0.994	0.903725
Branched-chain-amino-acid aminotransferase OS=Mus musculus GN=Bcat1 PE=1 SV=1	Bcat1	0.988	0.903725
E3 ubiquitin-protein ligase NEDD4 OS=Mus musculus GN=Nedd4 PE=1 SV=3	Nedd4	0.984	0.903725
Protein NDRG3 OS=Mus musculus GN=Ndrg3 PE=1 SV=1	Ndrg3	0.974	0.903725
Nitric oxide-associated protein 1 OS=Mus musculus GN=Noa1 PE=1 SV=1	Noa1	0.969	0.903725
Spermatogenesis-associated protein 5 OS=Mus musculus GN=Spata5 PE=1 SV=1	Spata5	0.935	0.903725
Store-operated calcium entry-associated regulatory factor OS=Mus musculus GN=Saraf PE=1 SV=2	Saraf	0.989	0.905726
Zinc finger SWIM domain-containing protein 8 OS=Mus musculus GN=Zswim8 PE=1 SV=1	Zswim8	1.117	0.90596
Sodium- and chloride-dependent glycine transporter 1 OS=Mus musculus GN=Slc6a9 PE=1 SV=3	Slc6a9	1.099	0.90596
NAD(P)(+)--arginine ADP-ribosyltransferase (Fragment) OS=Mus musculus GN=Art3 PE=1 SV=1	Art3	1.187	0.906234
Probable ergosterol biosynthetic protein 28 OS=Mus musculus GN=ORF11 PE=2 SV=1	Erg28	1.134	0.906234
P2X purinoceptor 7 OS=Mus musculus GN=P2rx7 PE=1 SV=2	P2rx7	1.113	0.906234
Delta-1-pyrroline-5-carboxylate dehydrogenase, mitochondrial OS=Mus musculus GN=Aldh4a1 PE=1 SV=3	Aldh4a1	1.113	0.906234
Prostaglandin-H2 D-isomerase OS=Mus musculus GN=Ptgds PE=1 SV=1	Ptgds	1.11	0.906234
Long-chain-fatty-acid--CoA ligase 6 OS=Mus musculus GN=Acsl6 PE=1 SV=1	Acsl6	1.105	0.906234
Pyruvate carboxylase OS=Mus musculus GN=Pcx PE=1 SV=1	Pcx	1.103	0.906234
SEC14-like protein 2 OS=Mus musculus GN=Sec14l2 PE=1 SV=1	Sec14l2	0.99	0.906234
Methionine--tRNA ligase, cytoplasmic OS=Mus musculus GN=Mars PE=1 SV=1	Mars1	0.987	0.906234
Mapk-regulated corepressor-interacting protein 1 OS=Mus musculus GN=Mcrip1 PE=1 SV=1	Mcrip1	0.984	0.906234
Pre-rRNA-processing protein TSR2 homolog OS=Mus musculus GN=Tsr2 PE=1 SV=1	Tsr2	0.979	0.906234
Aromatic-L-amino-acid decarboxylase OS=Mus musculus GN=Ddc PE=1 SV=1	Ddc	0.976	0.906234
Keratin-associated protein 3-1 OS=Mus musculus GN=Krtap3-1 PE=3 SV=1	Krtap3-1	0.975	0.906234
MCG16685, isoform CRA_d OS=Mus musculus GN=Wtap PE=1 SV=1	Wtap	0.971	0.906234
Aminoacyl tRNA synthase complex-interacting multifunctional protein 2 OS=Mus musculus GN=Aimp2 PE=1 SV=2	Aimp2	0.97	0.906234
Armadillo repeat-containing protein 10 OS=Mus musculus GN=Armc10 PE=1 SV=1	Armc10	1.111	0.906843
Nucleolin OS=Mus musculus GN=Ncl PE=1 SV=2	Ncl	0.976	0.90732
Pre-mRNA-processing factor 40 homolog A OS=Mus musculus GN=Prpf40a PE=1 SV=1	Prpf40a	1.104	0.908061
Protein CDV3 OS=Mus musculus GN=Cdv3 PE=1 SV=2	Cdv3	1.103	0.908061
Cysteine desulfurase, mitochondrial OS=Mus musculus GN=Nfs1 PE=1 SV=3	Nfs1	1.001	0.908061
UPF0428 protein CXorf56 homolog OS=Mus musculus PE=1 SV=1	Steep1	0.965	0.908061
Ras-related protein Rap-2a OS=Mus musculus GN=Rap2a PE=1 SV=2	Rap2a	0.99	0.908414
Unconventional myosin-IXa OS=Mus musculus GN=Myo9a PE=1 SV=1	Myo9a	1.113	0.908604
Sodium/hydrogen exchanger OS=Mus musculus GN=Slc9a6 PE=1 SV=1	Slc9a6	0.977	0.908604
Calpain-7 OS=Mus musculus GN=Capn7 PE=2 SV=1	Capn7	0.97	0.908604
Dihydropteridine reductase (Fragment) OS=Mus musculus GN=Qdpr PE=1 SV=1	Qdpr	0.969	0.908604
Serine/threonine-protein phosphatase 2A 55 kDa regulatory subunit B alpha isoform OS=Mus musculus GN=Ppp2r2a PE=1 SV=1	Ppp2r2a	0.987	0.908673
Phosphorylase b kinase regulatory subunit alpha, liver isoform OS=Mus musculus GN=Phka2 PE=1 SV=1	Phka2	0.977	0.908673
Protein-arginine deiminase type-2 OS=Mus musculus GN=Padi2 PE=1 SV=2	Padi2	0.976	0.909258
Protein tweety homolog 1 OS=Mus musculus GN=Ttyh1 PE=1 SV=1	Ttyh1	1.11	0.909607
Potassium-transporting ATPase subunit beta OS=Mus musculus GN=Atp4b PE=2 SV=1	Atp4b	0.985	0.909607
mRNA cap guanine-N7 methyltransferase (Fragment) OS=Mus musculus GN=Rnmt PE=1 SV=1	Rnmt	1.134	0.910088
Poly(ADP-ribose) glycohydrolase ARH3 OS=Mus musculus GN=Adprhl2 PE=1 SV=1	Adprs	1.126	0.910088
Smith-Magenis syndrome chromosomal region candidate gene 8 protein homolog OS=Mus musculus GN=Smcr8 PE=1 SV=2	Smcr8	1.117	0.910088
Coiled-coil and C2 domain-containing protein 1A OS=Mus musculus GN=Cc2d1a PE=1 SV=2	Cc2d1a	1.111	0.910088
N(G),N(G)-dimethylarginine dimethylaminohydrolase 1 OS=Mus musculus GN=Ddah1 PE=1 SV=3	Ddah1	1.107	0.910088
cAMP-specific 3',5'-cyclic phosphodiesterase 4D OS=Mus musculus GN=Pde4d PE=1 SV=2	Pde4d	1.105	0.910088
Transmembrane protein 33 OS=Mus musculus GN=Tmem33 PE=1 SV=1	Tmem33	1.105	0.910088
Autophagy-related protein 2 homolog B OS=Mus musculus GN=Atg2b PE=1 SV=3	Atg2b	1.002	0.910088
Phosphofurin acidic cluster sorting protein 2 OS=Mus musculus GN=Pacs2 PE=1 SV=1	Pacs2	1	0.910088
39S ribosomal protein L49, mitochondrial OS=Mus musculus GN=Mrpl49 PE=1 SV=1	Mrpl49	1	0.910088
1-phosphatidylinositol 4,5-bisphosphate phosphodiesterase delta-3 OS=Mus musculus GN=Plcd3 PE=1 SV=2	Plcd3	0.988	0.910088
Protein unc-45 homolog A OS=Mus musculus GN=Unc45a PE=1 SV=1		0.958	0.910088
Palladin OS=Mus musculus GN=Palld PE=1 SV=2	Palld	1.129	0.910113
Neurofascin OS=Mus musculus GN=Nfasc PE=1 SV=1	Nfasc	1.113	0.910113
Stromal membrane-associated protein 1 OS=Mus musculus GN=Smap1 PE=1 SV=1	Smap1	1.105	0.910113
Ras-related protein Rab-21 OS=Mus musculus GN=Rab21 PE=1 SV=4	Rab21	0.992	0.911791
Chloride channel protein OS=Mus musculus GN=Clcn6 PE=1 SV=1	Clcn6	0.99	0.911791
COP9 signalosome complex subunit 4 OS=Mus musculus GN=Cops4 PE=1 SV=1	Cops4	0.986	0.911791
Disks large-associated protein 4 OS=Mus musculus GN=Dlgap4 PE=1 SV=1	Dlgap4	1.186	0.912221
Ankyrin repeat and SAM domain-containing protein 1A OS=Mus musculus GN=Anks1a PE=1 SV=3	Anks1a	1.148	0.912221
Death-associated protein kinase 3 OS=Mus musculus GN=Dapk3 PE=1 SV=1	Dapk3	1.136	0.912221
Reticulocalbin-3 (Fragment) OS=Mus musculus GN=Rcn3 PE=1 SV=1	Rcn3	1.132	0.912221
Protein archease OS=Mus musculus GN=Zbtb8os PE=1 SV=1	Zbtb8os	1.131	0.912221
Tubulin--tyrosine ligase-like protein 12 OS=Mus musculus GN=Ttll12 PE=1 SV=1	Ttll12	1.11	0.912221
Regulator of microtubule dynamics protein 2 OS=Mus musculus GN=Rmdn2 PE=1 SV=1	Rmdn2	1.109	0.912221
Ubiquitin-associated protein 2-like OS=Mus musculus GN=Ubap2l PE=1 SV=1	Ubap2l	1.095	0.912221
Expressed sequence AA467197 (Fragment) OS=Mus musculus GN=AA467197 PE=1 SV=8	AA467197	1.003	0.912221
Anoctamin-10 OS=Mus musculus GN=Ano10 PE=1 SV=1	Ano10	1	0.912221
Dolichol-phosphate mannosyltransferase subunit 1 OS=Mus musculus GN=Dpm1 PE=1 SV=1	Dpm1	1	0.912221
Serine/threonine-protein phosphatase PP1-beta catalytic subunit OS=Mus musculus GN=Ppp1cb PE=1 SV=3	Ppp1cb	0.998	0.912221
[truncated: 4,079 more rows]

## Sheet: Significant only
Description	Gene Symbol	Abundance Ratio: (D) / (A)	Abundance Ratio Adj. P-Value: (D) / (A)
Myelin protein P0 OS=Mus musculus GN=Mpz PE=1 SV=1	Mpz	16.516	1.34679e-15
Collagen alpha-1(III) chain OS=Bos taurus GN=COL3A1 PE=1 SV=1	COL3A1	6.234	1.34679e-15
Collagen alpha-1(I) chain OS=Mus musculus GN=Col1a1 PE=1 SV=4	Col1a1	5.092	1.34679e-15
Periaxin OS=Mus musculus GN=Prx PE=1 SV=1	Prx	4.241	1.34679e-15
Myelin P2 protein OS=Mus musculus GN=Pmp2 PE=2 SV=2	Pmp2	3.484	1.34679e-15
Lumican OS=Mus musculus GN=Lum PE=1 SV=2	Lum	3.134	1.34679e-15
Collagen alpha-2(I) chain OS=Mus musculus GN=Col1a2 PE=1 SV=2	Col1a2	3.113	1.34679e-15
Collagen alpha-1(XI) chain OS=Mus musculus GN=Col11a1 PE=1 SV=2	Col11a1	2.683	1.34679e-15
ATP synthase mitochondrial F1 complex assembly factor 2 OS=Mus musculus GN=Atpaf2 PE=1 SV=1	Atpaf2	2.51	1.34679e-15
Claudin-19 OS=Mus musculus GN=Cldn19 PE=1 SV=3	Cldn19	2.435	1.34679e-15
Somatomedin-B and thrombospondin type-1 domain-containing protein OS=Mus musculus GN=Sbspon PE=2 SV=1	Sbspon	2.226	1.34679e-15
Junctophilin-1 OS=Mus musculus GN=Jph1 PE=1 SV=1	Jph1	2.108	4.3717e-08
Laminin subunit beta-1 OS=Mus musculus GN=Lamb1 PE=1 SV=1	Lamb1	2.098	1.34679e-15
Mimecan OS=Mus musculus GN=Ogn PE=1 SV=1	Ogn	1.931	1.34679e-15
Collagen alpha-2(V) chain OS=Mus musculus GN=Col5a2 PE=1 SV=1	Col5a2	1.921	6.989e-11
Luc7-like protein 3 (Fragment) OS=Mus musculus GN=Luc7l3 PE=1 SV=1	Luc7l3	1.906	2.87063e-06
Alpha globin 1 OS=Mus musculus GN=haemaglobin alpha 1 PE=1 SV=1	Hba-a1	1.883	1.34679e-15
Apolipoprotein A-I OS=Mus musculus GN=Apoa1 PE=1 SV=2	Apoa1	1.842	1.34679e-15
Laminin subunit alpha-2 OS=Mus musculus GN=Lama2 PE=1 SV=2	Lama2	1.835	1.34679e-15
UDP-glucose 4-epimerase OS=Mus musculus GN=Gale PE=1 SV=1	Gale	1.832	0.0108417
Haptoglobin OS=Mus musculus GN=Hp PE=1 SV=1	Hp	1.824	1.34679e-15
Neutrophilic granule protein OS=Mus musculus GN=Ngp PE=1 SV=1	Ngp	1.818	1.34679e-15
Collagen alpha-2(VI) chain OS=Mus musculus GN=Col6a2 PE=1 SV=3	Col6a2	1.809	1.34679e-15
Collagen alpha-1(VI) chain OS=Mus musculus GN=Col6a1 PE=1 SV=1	Col6a1	1.799	1.34679e-15
CD9 antigen OS=Mus musculus GN=Cd9 PE=1 SV=2	Cd9	1.793	1.34679e-15
Transforming growth factor-beta-induced protein ig-h3 OS=Mus musculus GN=Tgfbi PE=1 SV=1	Tgfbi	1.786	1.34679e-15
Biglycan OS=Mus musculus GN=Bgn PE=1 SV=1	Bgn	1.757	1.34679e-15
Protein 1700021F05Rik OS=Mus musculus GN=1700021F05Rik PE=1 SV=2	Mtres1	1.741	0.00638583
Matrilin-4 OS=Mus musculus GN=Matn4 PE=1 SV=1	Matn4	1.732	0.00115501
Epithelial membrane protein 2 OS=Mus musculus GN=Emp2 PE=1 SV=1	Emp2	1.708	1.50576e-09
Protein S100-A9 OS=Mus musculus GN=S100a9 PE=1 SV=3	S100a9	1.706	2.83445e-14
Beta-globin OS=Mus musculus GN=Hbbt1 PE=1 SV=1	Hbb-bs	1.697	1.34679e-15
Fibrillin-1 OS=Mus musculus GN=Fbn1 PE=1 SV=2	Fbn1	1.684	1.34679e-15
Carbonic anhydrase 1 OS=Mus musculus GN=Ca1 PE=1 SV=4	Ca1	1.677	5.27609e-07
O-phosphoseryl-tRNA(Sec) selenium transferase OS=Mus musculus GN=Sepsecs PE=4 SV=1	Sepsecs	1.668	1.34679e-15
DNA-directed RNA polymerase subunit OS=Mus musculus GN=Polr3a PE=1 SV=1	Polr3a	1.662	1.34679e-15
Coiled-coil domain containing 32 OS=Mus musculus GN=Ccdc32 PE=1 SV=1	Ccdc32	1.647	0.024813
Chromodomain-helicase-DNA-binding protein 6 (Fragment) OS=Mus musculus GN=Chd6 PE=1 SV=8	Chd6	1.64	0.00120528
Protein zer-1 homolog OS=Mus musculus GN=Zer1 PE=1 SV=1	Zer1	1.625	0.00973697
Collagen, type VI, alpha 3 OS=Mus musculus GN=Col6a3 PE=1 SV=1	Col6a3	1.623	2.43413e-12
Beta-secretase 1 OS=Mus musculus GN=Bace1 PE=1 SV=1	Bace1	1.618	0.000959397
Sine oculis-binding protein homolog OS=Mus musculus GN=Sobp PE=1 SV=1	Sobp	1.611	4.48162e-08
Leucine-rich repeat and guanylate kinase domain-containing protein OS=Mus musculus GN=Lrguk PE=1 SV=1	Lrguk	1.608	1.34679e-15
Apolipoprotein A-II OS=Mus musculus GN=Apoa2 PE=1 SV=2	Apoa2	1.607	4.2749e-13
Fibrinogen beta chain OS=Mus musculus GN=Fgb PE=1 SV=1	Fgb	1.607	1.35635e-12
CD151 antigen OS=Mus musculus GN=Cd151 PE=1 SV=2	Cd151	1.602	1.34679e-15
Coiled-coil domain containing 83, isoform CRA_c OS=Mus musculus GN=Ccdc83 PE=4 SV=1	Ccdc83	1.597	5.76059e-11
Crooked neck-like protein 1 OS=Mus musculus GN=Crnkl1 PE=1 SV=1	Crnkl1	1.591	2.46525e-13
U3 small nucleolar RNA-associated protein 4 homolog OS=Mus musculus GN=Utp4 PE=2 SV=3	Utp4	1.575	0.0217117
Integrin beta-4 OS=Mus musculus GN=Itgb4 PE=1 SV=1	Itgb4	1.572	0.00170483
Kininogen 2 OS=Mus musculus GN=Kng2 PE=1 SV=1	Kng2	1.569	1.07817e-05
Protein-glutamine gamma-glutamyltransferase 2 OS=Mus musculus GN=Tgm2 PE=1 SV=4	Tgm2	1.564	3.10574e-11
Fibrinogen alpha chain OS=Mus musculus GN=Fga PE=1 SV=1	Fga	1.562	2.77593e-12
Acidic leucine-rich nuclear phosphoprotein 32 family member B OS=Mus musculus GN=Anp32b PE=1 SV=1	Anp32b	1.554	2.20991e-13
Alpha-2-HS-glycoprotein OS=Mus musculus GN=Ahsg PE=1 SV=1	Ahsg	1.544	9.37097e-10
Microfibril-associated glycoprotein 4 OS=Mus musculus GN=Mfap4 PE=1 SV=1	Mfap4	1.541	0.0297033
Murinoglobulin-1 OS=Mus musculus GN=Mug1 PE=1 SV=3	Mug1	1.54	1.23318e-08
Carboxylesterase 1C OS=Mus musculus GN=Ces1c PE=1 SV=4	Ces1c	1.526	9.6292e-08
Decorin OS=Mus musculus GN=Dcn PE=1 SV=1	Dcn	1.523	1.60836e-12
Prolargin OS=Mus musculus GN=Prelp PE=1 SV=2	Prelp	1.49	3.41407e-08
Hemoglobin subunit beta-1 OS=Mus musculus GN=Hbb-b1 PE=1 SV=2	Hbb-b1	1.487	0.00953963
Calcium-binding protein 39-like OS=Mus musculus GN=Cab39l PE=1 SV=3	Cab39l	1.486	6.44156e-07
Beta-2-glycoprotein 1 OS=Mus musculus GN=Apoh PE=1 SV=1	Apoh	1.479	6.01775e-13
Sphingosine 1-phosphate receptor 2 (Fragment) OS=Mus musculus GN=S1pr2 PE=1 SV=1	S1pr2	1.476	1.57339e-05
Erythrocyte membrane protein band 4.2 OS=Mus musculus GN=Epb42 PE=1 SV=3	Epb42	1.475	7.02395e-10
Collagen alpha-1(XV) chain OS=Mus musculus GN=Col15a1 PE=1 SV=2	Col15a1	1.471	3.73625e-08
Metallothionein-1 OS=Mus musculus GN=Mt1 PE=1 SV=1	Mt1	1.468	2.07982e-10
Potassium channel subfamily T member 1 OS=Mus musculus GN=Kcnt1 PE=1 SV=1	Kcnt1	1.464	0.000146033
Matrix-remodeling-associated protein 7 OS=Mus musculus GN=Mxra7 PE=1 SV=2	Mxra7	1.46	0.00579797
Zinc transporter 8 OS=Mus musculus GN=Slc30a8 PE=2 SV=1	Slc30a8	1.448	3.39061e-08
Serum albumin OS=Mus musculus GN=Alb PE=1 SV=3	Alb	1.438	1.62416e-06
Fibrinogen gamma chain OS=Mus musculus GN=Fgg PE=1 SV=1	Fgg	1.429	3.10223e-06
Golgin subfamily A member 1 (Fragment) OS=Mus musculus GN=Golga1 PE=1 SV=3	Golga1	1.428	0.0117198
Eosinophil peroxidase OS=Mus musculus GN=Epx PE=1 SV=2	Epx	1.425	0.00572938
Uncharacterized protein OS=Mus musculus GN=Gm13420 PE=4 SV=1	Gm13420	1.425	0.0128236
Metallothionein-2 OS=Mus musculus GN=Mt2 PE=1 SV=2	Mt2	1.42	3.03517e-06
Zinc finger and SCAN domain-containing 18 OS=Mus musculus GN=Zscan18 PE=1 SV=1	Zscan18	1.415	4.81529e-08
Protein tweety homolog 2 OS=Mus musculus GN=Ttyh2 PE=1 SV=1	Ttyh2	1.415	0.0218012
Laminin subunit gamma-1 OS=Mus musculus GN=Lamc1 PE=1 SV=1	Lamc1	1.414	7.55544e-06
Serine protease inhibitor A3B OS=Mus musculus GN=Serpina3b PE=2 SV=1	Serpina3b	1.403	8.8946e-06
Fibronectin OS=Mus musculus GN=Fn1 PE=1 SV=1	Fn1	1.398	1.66413e-06
Proto-oncogene serine/threonine-protein kinase mos OS=Mus musculus GN=Mos PE=2 SV=2	Mos	1.396	1.62416e-06
Plasminogen OS=Mus musculus GN=Plg PE=1 SV=3	Plg	1.393	7.41093e-05
Interleukin-15 receptor subunit alpha OS=Mus musculus GN=Il15ra PE=1 SV=1	Il15ra	1.39	0.000198552
Ig alpha chain C region OS=Mus musculus PE=1 SV=1	IGHA1	1.385	0.000167619
[Pyruvate dehydrogenase (acetyl-transferring)] kinase isozyme 2, mitochondrial OS=Mus musculus GN=Pdk2 PE=1 SV=2	Pdk2	1.382	0.000343605
Hemopexin OS=Mus musculus GN=Hpx PE=1 SV=2	Hpx	1.38	3.38665e-06
NADH dehydrogenase [ubiquinone] 1 beta subcomplex subunit 6 OS=Mus musculus GN=Ndufb6 PE=1 SV=3	Ndufb6	1.373	5.84869e-05
SUMO-activating enzyme subunit 2 OS=Mus musculus GN=Uba2 PE=1 SV=1	Uba2	1.369	0.00112624
NADH-ubiquinone oxidoreductase chain 3 OS=Mus musculus GN=Mtnd3 PE=1 SV=3	mt-Nd3	1.366	1.6322e-05
Complement C3 OS=Mus musculus GN=C3 PE=1 SV=3	C3	1.365	1.41691e-06
Transthyretin OS=Mus musculus GN=Ttr PE=1 SV=1	Ttr	1.365	0.000115256
NADH dehydrogenase [ubiquinone] iron-sulfur protein 3, mitochondrial OS=Mus musculus GN=Ndufs3 PE=1 SV=2	Ndufs3	1.364	0.000142062
Sentrin-specific protease 6 (Fragment) OS=Mus musculus GN=Senp6 PE=1 SV=1	Senp6	1.363	6.97417e-05
Spectrin alpha chain, erythrocytic 1 OS=Mus musculus GN=Spta1 PE=1 SV=3	Spta1	1.357	5.73946e-05
Cytochrome c oxidase subunit 7A-related protein, mitochondrial OS=Mus musculus GN=Cox7a2l PE=1 SV=1	Cox7a2l	1.354	8.62854e-07
Alpha-1-antitrypsin 1-2 OS=Mus musculus GN=Serpina1b PE=1 SV=2	Serpina1b	1.353	1.05434e-05
MICOS complex subunit Mic26 OS=Mus musculus GN=Apoo PE=1 SV=2	Apoo	1.353	1.09618e-05
Dystrophin-related protein 2 OS=Mus musculus GN=Drp2 PE=1 SV=1	Drp2	1.353	0.000149076
Myosin-7 OS=Mus musculus GN=Myh7 PE=2 SV=1	Myh7	1.352	3.60458e-05
Vitronectin OS=Mus musculus GN=Vtn PE=1 SV=2	Vtn	1.349	1.06468e-05
Alpha-1-antitrypsin 1-1 OS=Mus musculus GN=Serpina1a PE=1 SV=4	Serpina1a	1.347	1.55727e-05
Collagen alpha-1(XVIII) chain OS=Mus musculus GN=Col18a1 PE=1 SV=1	Col18a1	1.343	0.00076611
Cytochrome c oxidase subunit 5A, mitochondrial OS=Mus musculus GN=Cox5a PE=1 SV=2	Cox5a	1.341	0.000503487
Carbonic anhydrase 3 OS=Mus musculus GN=Ca3 PE=1 SV=3	Ca3	1.336	5.2104e-05
NADH dehydrogenase [ubiquinone] 1 alpha subcomplex subunit 7 OS=Mus musculus GN=Ndufa7 PE=1 SV=3	Ndufa7	1.332	0.000844856
Cell cycle exit and neuronal differentiation protein 1 OS=Mus musculus GN=Cend1 PE=1 SV=1	Cend1	1.327	0.0010657
Putative uncharacterized protein OS=Mus musculus GN=Gm5615 PE=2 SV=1	Pate9	1.326	0.012172
WD repeat-containing protein 59 OS=Mus musculus GN=Wdr59 PE=1 SV=2	Wdr59	1.323	0.0335206
Protein S100-A11 OS=Mus musculus GN=S100a11 PE=1 SV=1	S100a11	1.321	0.00681988
NADH dehydrogenase [ubiquinone] 1 beta subcomplex subunit 9 OS=Mus musculus GN=Ndufb9 PE=1 SV=3	Ndufb9	1.316	0.00035388
NADH-ubiquinone oxidoreductase chain 4 OS=Mus musculus GN=Mtnd4 PE=1 SV=1	Mtnd4	1.316	0.00132231
NADH dehydrogenase [ubiquinone] 1 alpha subcomplex subunit 9, mitochondrial OS=Mus musculus GN=Ndufa9 PE=1 SV=1	Ndufa9	1.316	0.0019107
Collagen alpha-1(XII) chain OS=Mus musculus GN=Col12a1 PE=2 SV=3	Col12a1	1.312	0.000110955
Sigma non-opioid intracellular receptor 1 OS=Mus musculus GN=Sigmar1 PE=1 SV=1	Sigmar1	1.312	0.0110244
NADH dehydrogenase [ubiquinone] 1 alpha subcomplex subunit 3 OS=Mus musculus GN=Ndufa3 PE=1 SV=1	Ndufa3	1.31	0.000166701
Fibromodulin OS=Mus musculus GN=Fmod PE=2 SV=1	Fmod	1.309	0.000759241
NADH dehydrogenase [ubiquinone] 1 alpha subcomplex subunit 11 OS=Mus musculus GN=Ndufa11 PE=1 SV=2	Ndufa11	1.308	9.36204e-05
Cytochrome b-c1 complex subunit 9 OS=Mus musculus GN=Uqcr10 PE=1 SV=1	Uqcr10	1.306	0.00285329
ATP synthase subunit f, mitochondrial OS=Mus musculus GN=Atp5j2 PE=1 SV=1	Atp5j2	1.305	0.000550262
NADH dehydrogenase [ubiquinone] 1 beta subcomplex subunit 5, mitochondrial OS=Mus musculus GN=Ndufb5 PE=1 SV=1	Ndufb5	1.303	0.00366809
NADH dehydrogenase [ubiquinone] flavoprotein 1, mitochondrial OS=Mus musculus GN=Ndufv1 PE=1 SV=1	Ndufv1	1.302	0.00395946
Cytochrome b OS=Mus musculus GN=Mt-Cyb PE=1 SV=1	Mt-Cyb	1.299	4.47207e-05
Cytochrome c oxidase subunit 6A1, mitochondrial OS=Mus musculus GN=Cox6a1 PE=1 SV=2	Cox6a1	1.296	0.000523296
Cytochrome c oxidase subunit 1 OS=Mus musculus GN=Mtco1 PE=1 SV=2	Mtco1	1.295	0.00196075
Zinc finger protein 882 (Fragment) OS=Mus musculus GN=Zfp882 PE=4 SV=1	Zfp882	1.291	0.012172
Uncharacterized protein OS=Mus musculus GN=Gm20425 PE=4 SV=1	Gm20425	1.291	0.017775
Hemicentin-1 OS=Mus musculus GN=Hmcn1 PE=1 SV=1	Hmcn1	1.285	0.000159516
Cytochrome b-c1 complex subunit 8 OS=Mus musculus GN=Uqcrq PE=1 SV=3	Uqcrq	1.284	0.00905124
Metallothionein-3 OS=Mus musculus GN=Mt3 PE=1 SV=1	Mt3	1.284	0.0152211
NADH dehydrogenase [ubiquinone] 1 alpha subcomplex subunit 2 OS=Mus musculus GN=Ndufa2 PE=1 SV=3	Ndufa2	1.281	0.0103769
Prothrombin OS=Mus musculus GN=F2 PE=1 SV=1	F2	1.281	0.03489
NADH dehydrogenase [ubiquinone] iron-sulfur protein 6, mitochondrial OS=Mus musculus GN=Ndufs6 PE=1 SV=2	Ndufs6	1.279	0.011678
NADH dehydrogenase [ubiquinone] flavoprotein 3, mitochondrial OS=Mus musculus GN=Ndufv3 PE=1 SV=1	Ndufv3	1.278	0.00112606
Band 3 anion transport protein OS=Mus musculus GN=Slc4a1 PE=1 SV=1	Slc4a1	1.278	0.0230373
Thrombospondin-1 OS=Mus musculus GN=Thbs1 PE=1 SV=1	Thbs1	1.278	0.0283102
Cytochrome b-c1 complex subunit 1, mitochondrial OS=Mus musculus GN=Uqcrc1 PE=1 SV=2	Uqcrc1	1.277	0.0120879
NADH-ubiquinone oxidoreductase chain 2 OS=Mus musculus GN=Mtnd2 PE=1 SV=2	mt-Nd2	1.275	0.00443205
Cytochrome c oxidase subunit 6B1 OS=Mus musculus GN=Cox6b1 PE=1 SV=2	Cox6b1	1.275	0.013157
EF-hand calcium-binding domain-containing protein 3 OS=Mus musculus GN=Efcab3 PE=2 SV=1	Efcab3	1.275	0.0228634
Cytochrome b-c1 complex subunit 2, mitochondrial OS=Mus musculus GN=Uqcrc2 PE=1 SV=1	Uqcrc2	1.274	0.0132568
Pregnancy zone protein OS=Mus musculus GN=Pzp PE=1 SV=3	Pzp	1.27	0.031265
PDZ domain-containing 2 OS=Mus musculus GN=Pdzd2 PE=1 SV=1	Pdzd2	1.27	0.0477624
Heat shock protein beta-1 OS=Mus musculus GN=Hspb1 PE=1 SV=3	Hspb1	1.269	0.0165352
NADH-ubiquinone oxidoreductase 75 kDa subunit, mitochondrial OS=Mus musculus GN=Ndufs1 PE=1 SV=2	Ndufs1	1.269	0.0170434
NADH dehydrogenase [ubiquinone] 1 alpha subcomplex subunit 8 OS=Mus musculus GN=Ndufa8 PE=1 SV=3	Ndufa8	1.269	0.0171357
Amine oxidase [flavin-containing] B OS=Mus musculus GN=Maob PE=1 SV=4	Maob	1.269	0.0327569
Presenilins-associated rhomboid-like protein, mitochondrial OS=Mus musculus GN=Parl PE=1 SV=1	Parl	1.268	0.00335695
Cytochrome c oxidase assembly factor 3 homolog, mitochondrial OS=Mus musculus GN=Coa3 PE=1 SV=1	Coa3	1.267	0.0097219
Rap1 GTPase-activating protein 2 OS=Mus musculus GN=Rap1gap2 PE=1 SV=1	Rap1gap2	1.267	0.0237978
NADH dehydrogenase [ubiquinone] 1 beta subcomplex subunit 1 OS=Mus musculus GN=Ndufb1 PE=3 SV=1	Ndufb1	1.266	0.0121941
Cytochrome b-c1 complex subunit Rieske, mitochondrial OS=Mus musculus GN=Uqcrfs1 PE=1 SV=1	Uqcrfs1	1.266	0.018654
NADH dehydrogenase [ubiquinone] iron-sulfur protein 2, mitochondrial OS=Mus musculus GN=Ndufs2 PE=1 SV=1	Ndufs2	1.266	0.0190686
NADH dehydrogenase [ubiquinone] 1 beta subcomplex subunit 4 OS=Mus musculus GN=Ndufb4 PE=1 SV=3	Ndufb4	1.262	0.012409
NADH dehydrogenase [ubiquinone] 1 alpha subcomplex subunit 13 OS=Mus musculus GN=Ndufa13 PE=1 SV=3	Ndufa13	1.262	0.0162967
Beta-synuclein OS=Mus musculus GN=Sncb PE=1 SV=1	Sncb	1.261	0.00668276
NADH dehydrogenase [ubiquinone] 1 alpha subcomplex subunit 5 OS=Mus musculus GN=Ndufa5 PE=1 SV=3	Ndufa5	1.261	0.0122888
Activated RNA polymerase II transcriptional coactivator p15 OS=Mus musculus GN=Sub1 PE=1 SV=3	Sub1	1.261	0.0419342
Cytochrome c oxidase subunit 7C, mitochondrial OS=Mus musculus GN=Cox7c PE=1 SV=1	Cox7c	1.26	0.0242659
Peptidyl-prolyl cis-trans isomerase NIMA-interacting 1 OS=Mus musculus GN=Pin1 PE=1 SV=1	Pin1	1.257	0.0413373
NADH dehydrogenase [ubiquinone] 1 beta subcomplex subunit 10 OS=Mus musculus GN=Ndufb10 PE=1 SV=3	Ndufb10	1.256	0.0287551
NADH dehydrogenase [ubiquinone] iron-sulfur protein 7, mitochondrial OS=Mus musculus GN=Ndufs7 PE=1 SV=1	Ndufs7	1.255	0.017775
NADH dehydrogenase [ubiquinone] iron-sulfur protein 5 (Fragment) OS=Mus musculus GN=Ndufs5 PE=1 SV=1	Ndufs5	1.255	0.018825
Calcineurin binding protein 1, isoform CRA_a OS=Mus musculus GN=Cabin1 PE=1 SV=1	Cabin1	1.254	0.0022032
von Willebrand factor A domain-containing protein 1 OS=Mus musculus GN=Vwa1 PE=1 SV=1	Vwa1	1.254	0.0101629
Syntaxin-6 OS=Mus musculus GN=Stx6 PE=1 SV=1	Stx6	1.254	0.0174498
Collagen alpha-1(IV) chain OS=Mus musculus GN=Col4a1 PE=1 SV=4	Col4a1	1.253	0.0110244
Methylenetetrahydrofolate reductase OS=Mus musculus GN=Mthfr PE=1 SV=2	Mthfr	1.252	0.0206602
NADH dehydrogenase [ubiquinone] 1 alpha subcomplex subunit 10, mitochondrial OS=Mus musculus GN=Ndufa10 PE=1 SV=1	Ndufa10	1.25	0.0371853
Cytochrome c oxidase subunit 7B, mitochondrial OS=Mus musculus GN=Cox7b PE=3 SV=1	Cox7b	1.249	0.0144613
Plasmolipin OS=Mus musculus GN=Pllp PE=1 SV=1	Pllp	1.249	0.0446076
Copine-6 OS=Mus musculus GN=Cpne6 PE=1 SV=1	Cpne6	1.248	0.020983
CD44 antigen OS=Mus musculus GN=Cd44 PE=1 SV=1	Cd44	1.247	0.0127934
FUN14 domain-containing protein 2 OS=Mus musculus GN=Fundc2 PE=1 SV=1	Fundc2	1.246	0.0429951
Cytochrome c oxidase subunit 7A2, mitochondrial OS=Mus musculus GN=Cox7a2 PE=1 SV=2	Cox7a2	1.243	0.0475665
Nidogen-1 OS=Mus musculus GN=Nid1 PE=1 SV=2	Nid1	1.243	0.0479416
Non-specific serine/threonine protein kinase (Fragment) OS=Mus musculus GN=Mark2 PE=1 SV=1	Mark2	1.24	0.0404013
Inter-alpha-trypsin inhibitor heavy chain H3 OS=Mus musculus GN=Itih3 PE=1 SV=1	Itih3	1.238	0.0390929
Ufm1-specific protease 2 OS=Mus musculus GN=Ufsp2 PE=1 SV=1	Ufsp2	1.229	0.0173309
Creatine kinase M-type OS=Mus musculus GN=Ckm PE=1 SV=1	Ckm	1.229	0.0200041
Platelet-activating factor acetylhydrolase IB subunit beta (Fragment) OS=Mus musculus GN=Pafah1b2 PE=1 SV=1	Pafah1b2	1.225	0.0387948
ProSAAS OS=Mus musculus GN=Pcsk1n PE=1 SV=2	Pcsk1n	1.225	0.0471499
MICOS complex subunit Mic10 OS=Mus musculus GN=Minos1 PE=1 SV=1	Micos10	1.222	0.0487263
Non-specific lipid-transfer protein OS=Mus musculus GN=Scp2 PE=1 SV=3	Scp2	1.206	0.0467815
Coiled-coil domain-containing protein 127 (Fragment) OS=Mus musculus GN=Ccdc127 PE=1 SV=1	Ccdc127	1.205	0.0471499
Dynactin subunit 6 OS=Mus musculus GN=Dctn6 PE=1 SV=1	Dctn6	0.884	0.0122888
Cerebellar degeneration-related protein 2-like OS=Mus musculus GN=Cdr2l PE=1 SV=1	Cdr2l	0.88	0.0150082
Syndecan-4 OS=Mus musculus GN=Sdc4 PE=1 SV=1	Sdc4	0.878	0.0109348
Keratin, type II cuticular Hb4 OS=Mus musculus GN=Krt84 PE=2 SV=2	Krt84	0.877	0.0262599
Histone H1.1 OS=Mus musculus GN=Hist1h1a PE=1 SV=2	H1-1	0.876	0.0331813
Nebulin OS=Mus musculus GN=Neb PE=1 SV=1	Neb	0.87	0.0413343
Lysosome-associated membrane glycoprotein 2 OS=Mus musculus GN=Lamp2 PE=1 SV=2	Lamp2	0.867	0.0139252
Nucleoside diphosphate kinase OS=Mus musculus GN=Gm20390 PE=3 SV=1	Gm20390	0.864	0.042957
ADP/ATP translocase 2 OS=Mus musculus GN=Slc25a5 PE=1 SV=3	Slc25a5	0.86	0.0334137
Small nuclear ribonucleoprotein Sm D3 OS=Mus musculus GN=Snrpd3 PE=1 SV=1	Snrpd3	0.856	0.00991331
F-box/WD repeat-containing protein 11 OS=Mus musculus GN=Fbxw11 PE=1 SV=1	Fbxw11	0.855	0.0363627
Actin, cytoplasmic 1 (Fragment) OS=Mus musculus GN=Actb PE=1 SV=1	Actb	0.852	0.00244214
Interleukin-33 OS=Mus musculus GN=Il33 PE=1 SV=1	Il33	0.848	0.00123032
Autophagy protein 5 OS=Mus musculus GN=Atg5 PE=1 SV=1	Atg5	0.848	0.00419036
Keratin, type I cuticular Ha4 OS=Mus musculus GN=Krt34 PE=2 SV=1	Krt34	0.844	0.0129267
60S ribosomal protein L24 OS=Mus musculus GN=Rpl24 PE=1 SV=2	Rpl24	0.842	0.0113183
Proliferating cell nuclear antigen OS=Mus musculus GN=Pcna PE=1 SV=2	Pcna	0.842	0.0239046
Tetratricopeptide repeat protein 30A2 OS=Mus musculus GN=Ttc30a2 PE=1 SV=1	Ttc30a2	0.838	0.0110244
Peptidyl-prolyl cis-trans isomerase A OS=Mus musculus GN=Ppia PE=1 SV=2	Ppia	0.836	0.00777729
Heterogeneous nuclear ribonucleoproteins A2/B1 OS=Mus musculus GN=Hnrnpa2b1 PE=1 SV=2	Hnrnpa2b1	0.836	0.00779558
39S ribosomal protein L35, mitochondrial OS=Mus musculus GN=Mrpl35 PE=2 SV=1	Mrpl35	0.835	0.0357998
Histone H1.4 OS=Mus musculus GN=Hist1h1e PE=1 SV=2	H1-4	0.831	0.0053127
Protein S100-A3 OS=Mus musculus GN=S100a3 PE=2 SV=1	S100a3	0.831	0.0155585
Tropomyosin beta chain OS=Mus musculus GN=Tpm2 PE=1 SV=1	Tpm2	0.827	0.000417763
CTP synthase 2 OS=Mus musculus GN=Ctps2 PE=1 SV=1	Ctps2	0.826	0.0100564
Putative uncharacterized protein OS=Mus musculus GN=Tpm1 PE=1 SV=1	Tpm1	0.813	0.00063768
Keratin, type I cuticular Ha3-I OS=Mus musculus GN=Krt33a PE=1 SV=1	Krt33a	0.8	0.000110955
Keratin associated protein 13-1 OS=Mus musculus GN=Krtap13-1 PE=1 SV=1	Krtap13-1	0.799	0.010347
Lactadherin OS=Mus musculus GN=Mfge8 PE=1 SV=3	Mfge8	0.795	2.9968e-05
Myomesin 2 OS=Mus musculus GN=Myom2 PE=1 SV=1	Myom2	0.795	0.000812334
Keratin, type I cuticular Ha3-II OS=Mus musculus GN=Krt33b PE=1 SV=2	Krt33b	0.792	2.08304e-06
Eukaryotic initiation factor 4A-III OS=Mus musculus GN=Eif4a3 PE=1 SV=3	Eif4a3	0.788	0.000116282
Protein LCHN OS=Mus musculus GN=Lchn PE=2 SV=1	Dennd11	0.787	0.00759072
Keratin, type II cuticular Hb1 OS=Mus musculus GN=Krt81 PE=2 SV=2	Krt81	0.782	5.56983e-05
U4/U6 small nuclear ribonucleoprotein Prp3 OS=Mus musculus GN=Prpf3 PE=1 SV=1	Prpf3	0.781	0.00619066
Actin, alpha skeletal muscle OS=Mus musculus GN=Acta1 PE=1 SV=1	Acta1	0.78	3.89768e-05
Keratin, type II cuticular 87 OS=Mus musculus GN=Krt87 PE=2 SV=2	Krt87	0.765	6.62767e-07
Putative RNA-binding protein Luc7-like 1 (Fragment) OS=Mus musculus GN=Luc7l PE=1 SV=1	Luc7l	0.758	0.00116292
Nuclear pore complex protein Nup50 OS=Mus musculus GN=Nup50 PE=1 SV=3	Nup50	0.757	0.000241888
Integrator complex subunit 13 (Fragment) OS=Mus musculus GN=Ints13 PE=1 SV=8	Ints13	0.753	0.012172
Dual specificity protein phosphatase 26 OS=Mus musculus GN=Dusp26 PE=2 SV=2	Dusp26	0.745	1.28695e-06
Keratin, type II cuticular Hb6 OS=Mus musculus GN=Krt86 PE=2 SV=2	Krt86	0.733	2.07939e-07
Selenocysteine lyase OS=Mus musculus GN=Scly PE=1 SV=1	Scly	0.732	0.0471499
Troponin T, fast skeletal muscle OS=Mus musculus GN=Tnnt3 PE=1 SV=1	Tnnt3	0.72	8.09284e-13
WD repeat-containing protein 26 OS=Mus musculus GN=Wdr26 PE=1 SV=1	Wdr26	0.72	5.53819e-10
Immunoglobulin heavy variable 10-1 (Fragment) OS=Mus musculus GN=Ighv10-1 PE=4 SV=1	Ighv10-1	0.711	6.73964e-05
Fc receptor-like protein 5 OS=Mus musculus GN=Fcrl5 PE=1 SV=1	Fcrl5	0.711	0.011792
Transcription factor YY2 OS=Mus musculus GN=Yy2 PE=2 SV=1	Yy2	0.696	1.34679e-15
Troponin I, fast skeletal muscle (Fragment) OS=Mus musculus GN=Tnni2 PE=1 SV=1	Tnni2	0.695	2.83445e-14
Troponin C, skeletal muscle OS=Mus musculus GN=Tnnc2 PE=1 SV=2	Tnnc2	0.692	1.34679e-15
Malonyl-CoA-acyl carrier protein transacylase, mitochondrial OS=Mus musculus GN=Mcat PE=1 SV=3	Mcat	0.685	9.75667e-13
Keratin-associated protein 15-1 OS=Mus musculus GN=Krtap15-1 PE=2 SV=1	Krtap15-1	0.679	7.00097e-07
Myosin light chain 1/3, skeletal muscle isoform OS=Mus musculus GN=Myl1 PE=1 SV=2	Myl1	0.661	1.34679e-15
ADP/ATP translocase 1 OS=Mus musculus GN=Slc25a4 PE=1 SV=4	Slc25a4	0.654	4.04084e-13
Alpha-actinin-3 OS=Mus musculus GN=Actn3 PE=2 SV=1	Actn3	0.653	1.30376e-09
Ephrin type-B receptor 3 OS=Mus musculus GN=Ephb3 PE=1 SV=2	Ephb3	0.652	1.34679e-15
Calsequestrin-1 OS=Mus musculus GN=Casq1 PE=1 SV=3	Casq1	0.649	1.34679e-15
Poly(rC)-binding protein 1 OS=Mus musculus GN=Pcbp1 PE=1 SV=1	Pcbp1	0.647	1.34679e-15
Myosin regulatory light chain 2, skeletal muscle isoform OS=Mus musculus GN=Mylpf PE=1 SV=3	Myl11	0.643	1.34679e-15
U11/U12 small nuclear ribonucleoprotein 35 kDa protein (Fragment) OS=Mus musculus GN=Snrnp35 PE=1 SV=1	Snrnp35	0.627	0.0109938
Galectin OS=Mus musculus GN=Pick1 PE=1 SV=1	Gm49486	0.617	8.27351e-06
Myosin-4 OS=Mus musculus GN=Myh4 PE=2 SV=1	Myh4	0.598	1.34679e-15
Keratin-associated protein 4-6 OS=Mus musculus GN=Krtap4-6 PE=1 SV=1	Krtap4-6	0.598	4.63476e-05
TATA element modulatory factor OS=Mus musculus GN=Tmf1 PE=1 SV=1	Tmf1	0.546	0.000134489
Uncharacterized protein OS=Mus musculus GN=Gm11568 PE=4 SV=1	Gm11568	0.529	6.59034e-08
Glycine tyrosine-rich hair keratin protein OS=Mus musculus GN=Krtap6-1 PE=2 SV=1	1110025L11Rik	0.469	1.34679e-15
TGF-beta receptor type-2 OS=Mus musculus GN=Tgfbr2 PE=1 SV=1	Tgfbr2	0.423	1.34679e-15
Long-chain fatty acid transport protein 4 OS=Mus musculus GN=Slc27a4 PE=1 SV=1	Slc27a4	0.344	1.34679e-15
