# Supplementary material for: Mitochondrial protein import stress augments α-synuclein aggregation and neural damage independent of bioenergetics
Source: Research Square preprint supplement (doi:10.21203/rs.3.rs-3136613/v1), 2025-08-18
Supplement: Supplementary file 3 [file 6b843f877acf75c59fe4e1a7.xlsx]

## Sheet: All proteins
Description	Gene Symbol	Abundance Ratio: (D) / (A)	Abundance Ratio Adj. P-Value: (D) / (A)
Malonyl-CoA-acyl carrier protein transacylase, mitochondrial OS=Mus musculus GN=Mcat PE=1 SV=3	Q8R3F5	1.065	0.974607
Medium-chain specific acyl-CoA dehydrogenase, mitochondrial OS=Mus musculus GN=Acadm PE=1 SV=1	P45952	1.236	0.102408
Electron transfer flavoprotein subunit alpha, mitochondrial OS=Mus musculus GN=Etfa PE=1 SV=2	Q99LC5	0.951	0.962697
Acyl-CoA synthetase family member 3, mitochondrial OS=Mus musculus GN=Acsf3 PE=1 SV=2	Q3URE1	1.14	0.771493
ATPase inhibitor, mitochondrial OS=Mus musculus GN=Atpif1 PE=1 SV=1	E9PV44	1.303	0.295769
Calcium-binding mitochondrial carrier protein Aralar1 OS=Mus musculus GN=Slc25a12 PE=1 SV=1	Q8BH59	0.958	0.959234
Mitochondrial pyruvate carrier OS=Mus musculus GN=Mpc1 PE=1 SV=1	D3YWY6	0.902	0.781951
NADH dehydrogenase [ubiquinone] iron-sulfur protein 2, mitochondrial OS=Mus musculus GN=Ndufs2 PE=1 SV=1	Q91WD5	1.091	0.948088
Mitochondrial dicarboxylate carrier OS=Mus musculus GN=Slc25a10 PE=1 SV=2	Q9QZD8	1.133	0.940082
Single-stranded DNA-binding protein, mitochondrial OS=Mus musculus GN=Ssbp1 PE=1 SV=1	Q9CYR0	1.256	0.499091
m-AAA protease-interacting protein 1, mitochondrial OS=Mus musculus GN=Maip1 PE=1 SV=1	Q8BHE8	0.917	0.79227
Oligoribonuclease, mitochondrial OS=Mus musculus GN=Rexo2 PE=1 SV=2	Q9D8S4	0.844	0.476695
Mitochondrial glutamate carrier 1 OS=Mus musculus GN=Slc25a22 PE=1 SV=1	E9Q6M6	1.122	0.761285
Enoyl-CoA hydratase domain-containing protein 3, mitochondrial OS=Mus musculus GN=Echdc3 PE=1 SV=1	Q9D7J9	0.884	0.680199
Enoyl-CoA hydratase domain-containing protein 2, mitochondrial (Fragment) OS=Mus musculus GN=Echdc2 PE=1 SV=1	F6YTG0	1.794	0.0577742
Phospholipid hydroperoxide glutathione peroxidase, mitochondrial OS=Mus musculus GN=Gpx4 PE=1 SV=4	O70325	0.978	0.995649
ATP synthase subunit epsilon, mitochondrial OS=Mus musculus GN=Atp5e PE=1 SV=2	P56382	0.942	0.910292
Quinone oxidoreductase-like protein 2 OS=Mus musculus PE=1 SV=1	Q3UNZ8	1.142	0.67807
Diablo homolog, mitochondrial OS=Mus musculus GN=Diablo PE=1 SV=2	Q9JIQ3	1.017	0.998835
Cytochrome c oxidase subunit 6A1, mitochondrial OS=Mus musculus GN=Cox6a1 PE=1 SV=2	P43024	1.298	0.693501
NAD(P) transhydrogenase, mitochondrial OS=Mus musculus GN=Nnt PE=1 SV=1	Q8BGK0	0.92	0.848484
Thioredoxin reductase 2, mitochondrial OS=Mus musculus GN=Txnrd2 PE=1 SV=1	A0A0M3HEQ0	1.124	0.737359
Mitochondrial pyruvate carrier 2 OS=Mus musculus GN=Mpc2 PE=1 SV=1	Q9D023	0.955	0.913989
Mitochondrial import inner membrane translocase subunit TIM44 OS=Mus musculus GN=Timm44 PE=1 SV=2	O35857	0.992	0.998835
Transcription factor A, mitochondrial OS=Mus musculus GN=Tfam PE=1 SV=1	A0A0R4J1N9	1.02	0.978724
Delta-1-pyrroline-5-carboxylate dehydrogenase, mitochondrial OS=Mus musculus GN=Aldh4a1 PE=1 SV=3	Q8CHT0	1.013	0.975052
NADH dehydrogenase [ubiquinone] iron-sulfur protein 7, mitochondrial OS=Mus musculus GN=Ndufs7 PE=1 SV=1	Q9DC70	1.166	0.819804
Phosphatidate cytidylyltransferase, mitochondrial OS=Mus musculus GN=Tamm41 PE=1 SV=1	G5E881	1.07	0.964418
Mitochondrial fission factor OS=Mus musculus GN=Mff PE=1 SV=1	Q6PCP5	1.149	0.627794
ATP-dependent RNA helicase SUPV3L1, mitochondrial OS=Mus musculus GN=Supv3l1 PE=1 SV=1	Q80YD1	1.158	0.894667
Cytochrome c oxidase subunit 4 isoform 1, mitochondrial OS=Mus musculus GN=Cox4i1 PE=1 SV=2	P19783	0.986	0.993171
Acylglycerol kinase, mitochondrial OS=Mus musculus GN=Agk PE=1 SV=1	Q9ESW4	1.081	0.96987
Succinate--CoA ligase [ADP/GDP-forming] subunit alpha, mitochondrial OS=Mus musculus GN=Suclg1 PE=1 SV=4	Q9WUM5	1.066	0.851365
Methylglutaconyl-CoA hydratase, mitochondrial OS=Mus musculus GN=Auh PE=1 SV=1	A0A0R4J023	1.03	0.956508
Mitochondrial chaperone BCS1 OS=Mus musculus GN=Bcs1l PE=1 SV=1	Q9CZP5	1.08	0.911362
Phosphoenolpyruvate carboxykinase [GTP], mitochondrial OS=Mus musculus GN=Pck2 PE=1 SV=1	A0A0R4J0G0	1.169	0.53611
Ubiquinone biosynthesis monooxygenase COQ6, mitochondrial OS=Mus musculus GN=Coq6 PE=1 SV=3	Q8R1S0	1.094	0.931015
Succinate dehydrogenase [ubiquinone] cytochrome b small subunit, mitochondrial OS=Mus musculus GN=Sdhd PE=1 SV=2	Q9CXV1	1.156	0.701155
Acetyl-coenzyme A synthetase 2-like, mitochondrial OS=Mus musculus GN=Acss1 PE=1 SV=1	Q99NB1	1.096	0.907381
Mitochondrial carrier homolog 2 OS=Mus musculus GN=Mtch2 PE=1 SV=1	Q791V5	0.985	0.96987
[Pyruvate dehydrogenase (acetyl-transferring)] kinase isozyme 2, mitochondrial OS=Mus musculus GN=Pdk2 PE=1 SV=2	Q9JK42	1.109	0.883372
Glutamate dehydrogenase 1, mitochondrial OS=Mus musculus GN=Glud1 PE=1 SV=1	P26443	1.086	0.781698
Superoxide dismutase [Mn], mitochondrial OS=Mus musculus GN=Sod2 PE=1 SV=3	P09671	1.116	0.644601
MICOS complex subunit Mic25 OS=Mus musculus GN=Chchd6 PE=1 SV=2	Q91VN4
Voltage-dependent anion-selective channel protein 3 OS=Mus musculus GN=Vdac3 PE=1 SV=1	J3QMG3	0.907	0.770955
Glycerol-3-phosphate dehydrogenase, mitochondrial OS=Mus musculus GN=Gpd2 PE=1 SV=2	Q64521	1.063	0.861588
Succinate dehydrogenase [ubiquinone] iron-sulfur subunit, mitochondrial OS=Mus musculus GN=Sdhb PE=1 SV=1	Q9CQA3	0.972	0.993171
ADP/ATP translocase 1 OS=Mus musculus GN=Slc25a4 PE=1 SV=4	P48962	0.656	0.000100661
Cytochrome b-c1 complex subunit 9 OS=Mus musculus GN=Uqcr10 PE=1 SV=1	Q8R1I1	0.866	0.627794
Ubiquinol-cytochrome-c reductase complex assembly factor 1 (Fragment) OS=Mus musculus GN=Uqcc1 PE=1 SV=1	A6PWX8	0.911	0.841935
Cytochrome c1, heme protein, mitochondrial OS=Mus musculus GN=Cyc1 PE=1 SV=1	Q9D0M3	0.981	0.971776
Hydroxyacylglutathione hydrolase, mitochondrial OS=Mus musculus GN=Hagh PE=1 SV=2	Q99KB8	1.145	0.484682
NADP-dependent malic enzyme, mitochondrial OS=Mus musculus GN=Me3 PE=1 SV=2	Q8BMF3	1.075	0.81171
ADP-ribose pyrophosphatase, mitochondrial OS=Mus musculus GN=Nudt9 PE=1 SV=1	Q8BVU5	0.933	0.884382
ATP synthase F(0) complex subunit B1, mitochondrial OS=Mus musculus GN=Atp5f1 PE=1 SV=1	Q9CQQ7	0.778	0.102408
Cytochrome c-type heme lyase OS=Mus musculus GN=Hccs PE=1 SV=2	P53702	1.139	0.870888
Serine--tRNA ligase, mitochondrial OS=Mus musculus GN=Sars2 PE=1 SV=2	Q9JJL8	1.239	0.620989
Mitochondrial Rho GTPase 1 OS=Mus musculus GN=Rhot1 PE=1 SV=1	Q8BG51
Pyruvate dehydrogenase phosphatase regulatory subunit, mitochondrial OS=Mus musculus GN=Pdpr PE=1 SV=1	Q7TSQ8	1.576	0.107943
NADH dehydrogenase [ubiquinone] 1 beta subcomplex subunit 6 OS=Mus musculus GN=Ndufb6 PE=1 SV=3	Q3UIU2	0.01	3.34e-15
4-aminobutyrate aminotransferase, mitochondrial OS=Mus musculus GN=Abat PE=1 SV=1	P61922	1.171	0.393025
GTP:AMP phosphotransferase AK3, mitochondrial OS=Mus musculus GN=Ak3 PE=1 SV=3	Q9WTP7	1.007	0.990877
ATP synthase subunit d, mitochondrial OS=Mus musculus GN=Atp5h PE=1 SV=3	Q9DCX2	0.903	0.81171
Enoyl-CoA delta isomerase 2, mitochondrial OS=Mus musculus GN=Eci2 PE=1 SV=2	Q9WUR2	1.016	0.995649
Pyruvate dehydrogenase E1 component subunit alpha, somatic form, mitochondrial OS=Mus musculus GN=Pdha1 PE=1 SV=1	P35486	1.048	0.907381
Methylcrotonoyl-CoA carboxylase beta chain, mitochondrial OS=Mus musculus GN=Mccc2 PE=1 SV=1	Q3ULD5	1.097	0.759148
Glutamyl-tRNA(Gln) amidotransferase subunit B, mitochondrial OS=Mus musculus GN=Gatb PE=1 SV=1	Q99JT1
Complex III assembly factor LYRM7 OS=Mus musculus GN=Lyrm7 PE=3 SV=2	Q9DA03	1.109	0.972383
Methylmalonate-semialdehyde dehydrogenase [acylating], mitochondrial OS=Mus musculus GN=Aldh6a1 PE=1 SV=1	Q9EQ20	1.055	0.891564
Glycine cleavage system H protein, mitochondrial OS=Mus musculus GN=Gcsh PE=1 SV=2	Q91WK5	1.035	0.993171
D-beta-hydroxybutyrate dehydrogenase, mitochondrial OS=Mus musculus GN=Bdh1 PE=1 SV=2	Q80XN0	0.982	0.998835
UPF0160 protein MYG1, mitochondrial (Fragment) OS=Mus musculus GN=Myg1 PE=1 SV=1	F8WGG3	1.183	0.618146
Deoxyguanosine kinase, mitochondrial (Fragment) OS=Mus musculus GN=Dguok PE=1 SV=1	A0A0U1RPX3
NFU1 iron-sulfur cluster scaffold homolog, mitochondrial OS=Mus musculus GN=Nfu1 PE=1 SV=2	Q9QZ23	1.093	0.933578
Protein Mpv17 OS=Mus musculus GN=Mpv17 PE=1 SV=1	F8WHT5
Mitochondrial import inner membrane translocase subunit Tim13 OS=Mus musculus GN=Timm13 PE=1 SV=1	P62075	1.104	0.819992
AFG3-like protein 2 OS=Mus musculus GN=Afg3l2 PE=1 SV=1	Q8JZQ2	1.056	0.951081
Mitochondrial 10-formyltetrahydrofolate dehydrogenase OS=Mus musculus GN=Aldh1l2 PE=1 SV=1	D3Z6B9	0.943	0.899994
Lipoyl synthase, mitochondrial OS=Mus musculus GN=Lias PE=1 SV=1	Q99M04	1.002	0.966671
Endonuclease G, mitochondrial OS=Mus musculus GN=Endog PE=1 SV=1	O08600	1.144	0.816129
Mitochondrial-processing peptidase subunit beta OS=Mus musculus GN=Pmpcb PE=1 SV=1	Q9CXT8	0.948	0.907381
MICOS complex subunit Mic19 OS=Mus musculus GN=Chchd3 PE=1 SV=1	Q9CRB9	0.784	0.216797
Mitochondrial import inner membrane translocase subunit Tim9 OS=Mus musculus GN=Timm9 PE=1 SV=1	Q9WV98	1.078	0.939771
Proline dehydrogenase 1, mitochondrial OS=Mus musculus GN=Prodh PE=1 SV=2	Q9WU79	1.029	0.993171
Methionine-R-sulfoxide reductase B2, mitochondrial OS=Mus musculus GN=Msrb2 PE=1 SV=1	Q78J03	1.055	0.971776
Mitochondrial 2-oxoglutarate/malate carrier protein OS=Mus musculus GN=Slc25a11 PE=1 SV=3	Q9CR62	0.887	0.643877
Glutaryl-CoA dehydrogenase, mitochondrial OS=Mus musculus GN=Gcdh PE=1 SV=1	A0A0A0MQ68	1.15	0.848484
Mitochondrial thiamine pyrophosphate carrier (Fragment) OS=Mus musculus GN=Slc25a19 PE=1 SV=8	A2A9V7	1.127	0.956802
Aldehyde dehydrogenase, mitochondrial OS=Mus musculus GN=Aldh2 PE=1 SV=1	P47738	1.044	0.920674
ATP synthase mitochondrial F1 complex assembly factor 1 OS=Mus musculus GN=Atpaf1 PE=1 SV=1	H3BLL2	1.158	0.67761
Mitochondrial import inner membrane translocase subunit TIM16 OS=Mus musculus GN=Pam16 PE=1 SV=1	Q9CQV1	1.122	0.907381
Quinone oxidoreductase OS=Mus musculus GN=Cryz PE=1 SV=1	P47199	1.011	0.990877
Aminomethyltransferase, mitochondrial OS=Mus musculus GN=Amt PE=1 SV=1	Q8CFA2	1.177	0.747094
Cytochrome b-c1 complex subunit 7 OS=Mus musculus GN=Uqcrb PE=1 SV=1	Q9CQB4	0.991	0.990877
NADH dehydrogenase [ubiquinone] iron-sulfur protein 6, mitochondrial OS=Mus musculus GN=Ndufs6 PE=1 SV=2	P52503	0.813	0.375334
Voltage-dependent anion-selective channel protein 1 OS=Mus musculus GN=Vdac1 PE=1 SV=3	Q60932	0.791	0.0908633
MICOS complex subunit Mic26 OS=Mus musculus GN=Apoo PE=1 SV=2	Q9DCZ4	1.085	0.875018
Adenylate kinase 4, mitochondrial OS=Mus musculus GN=Ak4 PE=1 SV=1	Q9WUR9	1.108	0.787327
Lon protease homolog, mitochondrial OS=Mus musculus GN=Lonp1 PE=1 SV=2	Q8CGK3	1.018	0.96987
Ubiquinol-cytochrome-c reductase complex assembly factor 2 OS=Mus musculus GN=Uqcc2 PE=1 SV=1	D3Z4C9	1.397	0.170972
Creatine kinase U-type, mitochondrial OS=Mus musculus GN=Ckmt1 PE=1 SV=1	P30275	1.15	0.499091
NADH dehydrogenase [ubiquinone] 1 alpha subcomplex subunit 9, mitochondrial OS=Mus musculus GN=Ndufa9 PE=1 SV=1	A0A0R3P9C8	0.947	0.896258
ATP synthase subunit a OS=Mus musculus GN=Mtatp6 PE=1 SV=1	P00848	0.838	0.510435
Iron-sulfur cluster assembly enzyme ISCU, mitochondrial OS=Mus musculus GN=Iscu PE=1 SV=1	Q9D7P6	0.917	0.819804
Carbonic anhydrase 5B, mitochondrial OS=Mus musculus GN=Ca5b PE=1 SV=2	Q9QZA0	0.833	0.483251
Inorganic pyrophosphatase 2, mitochondrial OS=Mus musculus GN=Ppa2 PE=1 SV=1	Q91VM9	1.057	0.898151
Probable leucine--tRNA ligase, mitochondrial OS=Mus musculus GN=Lars2 PE=1 SV=1	Q8VDC0	0.995	0.982404
ATP synthase-coupling factor 6, mitochondrial OS=Mus musculus GN=Atp5j PE=1 SV=1	P97450	0.804	0.123866
Cytochrome c oxidase assembly factor 3 homolog, mitochondrial OS=Mus musculus GN=Coa3 PE=1 SV=1	E9Q6W2	0.911	0.787111
Acyl-CoA synthetase family member 2, mitochondrial OS=Mus musculus GN=Acsf2 PE=1 SV=1	Q8VCW8	0.949	0.962644
Protein SCO1 homolog, mitochondrial OS=Mus musculus GN=Sco1 PE=1 SV=1	Q5SUC9	1.025	0.99918
NADH dehydrogenase [ubiquinone] 1 alpha subcomplex subunit 6 OS=Mus musculus GN=Ndufa6 PE=1 SV=1	Q9CQZ5
39S ribosomal protein L23, mitochondrial OS=Mus musculus GN=Mrpl23 PE=1 SV=1	A0A1B0GSZ9	1.111	0.907381
MICOS complex subunit Mic60 OS=Mus musculus GN=Immt PE=1 SV=1	Q8CAQ8	0.913	0.798803
MICOS complex subunit Mic10 OS=Mus musculus GN=Minos1 PE=1 SV=1	Q7TNS2
2-oxoisovalerate dehydrogenase subunit alpha, mitochondrial OS=Mus musculus GN=Bckdha PE=1 SV=1	Q3U3J1	1.196	0.730015
ATP synthase subunit s, mitochondrial OS=Mus musculus GN=Atp5s PE=1 SV=1	Q9CRA7	1.065	0.970517
Succinate-semialdehyde dehydrogenase, mitochondrial OS=Mus musculus GN=Aldh5a1 PE=1 SV=1	Q8BWF0	1.051	0.8982
Trifunctional enzyme subunit alpha, mitochondrial OS=Mus musculus GN=Hadha PE=1 SV=1	Q8BMS1	0.972	0.993171
Trifunctional enzyme subunit beta, mitochondrial OS=Mus musculus GN=Hadhb PE=1 SV=1	Q99JY0	0.992	0.998835
Cytochrome b-c1 complex subunit 8 OS=Mus musculus GN=Uqcrq PE=1 SV=3	Q9CQ69	0.917	0.818914
NADH-ubiquinone oxidoreductase 75 kDa subunit, mitochondrial OS=Mus musculus GN=Ndufs1 PE=1 SV=2	Q91VD9	1.001	0.979275
ATP synthase subunit O, mitochondrial OS=Mus musculus GN=Atp5o PE=1 SV=1	Q9DB20	0.801	0.166626
Methylmalonyl-CoA epimerase, mitochondrial OS=Mus musculus GN=Mcee PE=1 SV=1	Q9D1I5	1.124	0.959092
Frataxin, mitochondrial OS=Mus musculus GN=Fxn PE=1 SV=1	O35943	1.338	0.308528
Mitochondrial import inner membrane translocase subunit TIM14 OS=Mus musculus GN=Dnajc19 PE=1 SV=1	D3Z5K6
Cytochrome c oxidase subunit 6B1 OS=Mus musculus GN=Cox6b1 PE=1 SV=1	A0A140LIU3	1.225	0.540411
Short-chain specific acyl-CoA dehydrogenase, mitochondrial OS=Mus musculus GN=Acads PE=1 SV=2	Q07417	1.1	0.707448
Mitochondrial fission regulator 1-like OS=Mus musculus GN=Mtfr1l PE=1 SV=1	Q9CWE0	1.007	0.986163
Glutaminase kidney isoform, mitochondrial OS=Mus musculus GN=Gls PE=1 SV=1	D3Z7P3	1.024	0.962697
Mitochondrial import receptor subunit TOM34 OS=Mus musculus GN=Tomm34 PE=1 SV=1	Q9CYG7	1.004	0.998835
Isocitrate dehydrogenase [NAD] subunit, mitochondrial OS=Mus musculus GN=Idh3a PE=1 SV=1	A0A1L1STE6	1.119	0.634878
Isocitrate dehydrogenase [NAD] subunit gamma 1, mitochondrial OS=Mus musculus GN=Idh3g PE=1 SV=1	P70404	1.118	0.634891
ATP synthase subunit beta, mitochondrial OS=Mus musculus GN=Atp5b PE=1 SV=2	P56480	0.895	0.774625
Very long-chain specific acyl-CoA dehydrogenase, mitochondrial OS=Mus musculus GN=Acadvl PE=1 SV=3	P50544	1.009	0.986163
Heat shock protein 75 kDa, mitochondrial OS=Mus musculus GN=Trap1 PE=1 SV=1	Q9CQN1	1.079	0.832431
Mitofusin-1 (Fragment) OS=Mus musculus GN=Mfn1 PE=1 SV=1	D3Z5P8	1.1	0.964418
Hydroxymethylglutaryl-CoA lyase, mitochondrial OS=Mus musculus GN=Hmgcl PE=1 SV=2	P38060	0.941	0.905053
5-demethoxyubiquinone hydroxylase, mitochondrial OS=Mus musculus GN=Coq7 PE=1 SV=1	A0A140LIF0	0.914	0.84284
2-oxoglutarate dehydrogenase, mitochondrial OS=Mus musculus GN=Ogdh PE=1 SV=3	Q60597	1.035	0.940541
Dihydrolipoyl dehydrogenase, mitochondrial OS=Mus musculus GN=Dld PE=1 SV=2	O08749	1.04	0.931015
Electron transfer flavoprotein-ubiquinone oxidoreductase, mitochondrial OS=Mus musculus GN=Etfdh PE=1 SV=1	Q921G7	1.032	0.951028
Ferrochelatase, mitochondrial OS=Mus musculus GN=Fech PE=1 SV=2	P22315	0.972	0.972383
Threonine--tRNA ligase, mitochondrial OS=Mus musculus GN=Tars2 PE=1 SV=1	Q3UQ84	1.122	0.962644
MICOS complex subunit Mic27 OS=Mus musculus GN=Apool PE=1 SV=1	Q78IK4	1.263	0.594335
Iron-sulfur cluster assembly 1 homolog, mitochondrial OS=Mus musculus GN=Isca1 PE=2 SV=1	Q9D924	0.952	0.928202
ATP synthase subunit alpha, mitochondrial OS=Mus musculus GN=Atp5a1 PE=1 SV=1	Q03265	0.83	0.381474
Isobutyryl-CoA dehydrogenase, mitochondrial OS=Mus musculus GN=Acad8 PE=1 SV=1	D3YTT4	0.976	0.97403
Thioredoxin-dependent peroxide reductase, mitochondrial OS=Mus musculus GN=Prdx3 PE=1 SV=1	P20108	1.006	0.990877
NAD-dependent protein deacylase sirtuin-5, mitochondrial OS=Mus musculus GN=Sirt5 PE=1 SV=1	Q8K2C6	1.101	0.905266
Cytochrome c oxidase subunit 5B, mitochondrial OS=Mus musculus GN=Cox5b PE=1 SV=1	P19536	0.943	0.8982
Isocitrate dehydrogenase [NADP], mitochondrial OS=Mus musculus GN=Idh2 PE=1 SV=3	P54071	1.086	0.781308
Hydroxyacid-oxoacid transhydrogenase, mitochondrial OS=Mus musculus GN=Adhfe1 PE=1 SV=2	Q8R0N6	1.121	0.940082
ADP/ATP translocase 2 OS=Mus musculus GN=Slc25a5 PE=1 SV=3	P51881	0.975	0.993171
Serine protease HTRA2, mitochondrial (Fragment) OS=Mus musculus GN=Htra2 PE=1 SV=1	F6TCV0	1.061	0.995649
Methylmalonyl-CoA mutase, mitochondrial OS=Mus musculus GN=Mut PE=1 SV=2	P16332	1.061	0.928202
NADH dehydrogenase [ubiquinone] 1 alpha subcomplex subunit 2 OS=Mus musculus GN=Ndufa2 PE=1 SV=3	Q9CQ75	0.914	0.851365
[Pyruvate dehydrogenase [acetyl-transferring]]-phosphatase 1, mitochondrial OS=Mus musculus GN=Pdp1 PE=1 SV=2	A2AJQ0	0.985	0.96987
ATP synthase subunit gamma OS=Mus musculus GN=Atp5c1 PE=1 SV=1	Q8C2Q8	0.857	0.55696
Ferredoxin-2, mitochondrial OS=Mus musculus GN=Fdx2 PE=1 SV=1	Q9CPW2	1.072	0.970555
Carnitine O-palmitoyltransferase 2, mitochondrial OS=Mus musculus GN=Cpt2 PE=1 SV=2	P52825	1.118	0.703941
Succinate dehydrogenase cytochrome b560 subunit, mitochondrial OS=Mus musculus GN=Sdhc PE=1 SV=1	F8WGB3	1.087	0.957238
Ubiquinone biosynthesis O-methyltransferase, mitochondrial OS=Mus musculus GN=Coq3 PE=1 SV=1	Q8BMS4	0.979	0.964418
3-hydroxyisobutyrate dehydrogenase, mitochondrial OS=Mus musculus GN=Hibadh PE=1 SV=1	Q99L13	1.089	0.771493
ATP synthase subunit f, mitochondrial OS=Mus musculus GN=Atp5j2 PE=1 SV=1	F8WHP8	0.969	0.979275
Mitochondrial import receptor subunit TOM70 OS=Mus musculus GN=Tomm70 PE=1 SV=2	Q9CZW5	0.867	0.547985
Succinate--CoA ligase [ADP-forming] subunit beta, mitochondrial OS=Mus musculus GN=Sucla2 PE=1 SV=2	Q9Z2I9	1.037	0.938246
NADH dehydrogenase [ubiquinone] flavoprotein 1, mitochondrial OS=Mus musculus GN=Ndufv1 PE=1 SV=1	D3YUM1	0.894	0.696315
NADH dehydrogenase [ubiquinone] 1 alpha subcomplex subunit 5 OS=Mus musculus GN=Ndufa5 PE=1 SV=3	Q9CPP6
Coenzyme Q10A OS=Mus musculus GN=Coq10a PE=1 SV=1	E9Q3H6	1.196	0.813609
Mitochondrial intermembrane space import and assembly protein 40 OS=Mus musculus GN=Chchd4 PE=1 SV=1	Q8VEA4
Calcium-binding mitochondrial carrier protein SCaMC-2 OS=Mus musculus GN=Slc25a25 PE=1 SV=1	A2ASZ8	0.937	0.898775
Long-chain-specific acyl-CoA dehydrogenase, mitochondrial OS=Mus musculus GN=Acadl PE=1 SV=1	A0A0R4J083	1.028	0.961157
Cytochrome c oxidase subunit 4 isoform 1, mitochondrial (Fragment) OS=Mus musculus GN=Cox4i1 PE=1 SV=1	M0QWX7
Protein OSCP1 OS=Mus musculus GN=Oscp1 PE=1 SV=1	Q8BHW2	1.066	0.96987
Mitofusin-2 OS=Mus musculus GN=Mfn2 PE=1 SV=3	Q80U63	1.139	0.76572
Mitochondrial glutamate carrier 2 OS=Mus musculus GN=Slc25a18 PE=1 SV=4	Q9DB41	1.037	0.949078
NAD-dependent malic enzyme, mitochondrial OS=Mus musculus GN=Me2 PE=1 SV=1	Q99KE1	1.033	0.979275
Cytochrome c, somatic OS=Mus musculus GN=Cycs PE=1 SV=2	P62897	1.137	0.55696
3-mercaptopyruvate sulfurtransferase OS=Mus musculus GN=Mpst PE=1 SV=3	Q99J99	1.123	0.634878
Sulfide:quinone oxidoreductase, mitochondrial OS=Mus musculus GN=Sqrdl PE=1 SV=1	F6ZKZ3	1.039	0.998835
Mitochondrial import inner membrane translocase subunit Tim10 OS=Mus musculus GN=Timm10 PE=1 SV=1	P62073	1.13	0.747094
ATP synthase subunit e, mitochondrial OS=Mus musculus GN=Atp5i PE=1 SV=2	Q06185	0.748	0.025965
Mitochondrial-processing peptidase subunit alpha OS=Mus musculus GN=Pmpca PE=1 SV=1	Q9DC61	1.058	0.964418
ATP synthase subunit g, mitochondrial OS=Mus musculus GN=Atp5l PE=1 SV=1	Q9CPQ8	0.859	0.688367
Mitochondrial antiviral-signaling protein OS=Mus musculus GN=Mavs PE=1 SV=1	Q8VCF0	0.852	0.634891
Cytochrome b-c1 complex subunit Rieske, mitochondrial OS=Mus musculus GN=Uqcrfs1 PE=1 SV=1	Q9CR68	1.117	0.794435
2-oxoisovalerate dehydrogenase subunit beta, mitochondrial OS=Mus musculus GN=Bckdhb PE=1 SV=2	Q6P3A8	0.955	0.937959
Dihydroorotate dehydrogenase (quinone), mitochondrial OS=Mus musculus GN=Dhodh PE=1 SV=2	O35435	1.086	0.949078
ATP synthase subunit delta, mitochondrial OS=Mus musculus GN=Atp5d PE=1 SV=1	Q9D3D9	0.908	0.828081
Isocitrate dehydrogenase [NAD] subunit, mitochondrial OS=Mus musculus GN=Idh3b PE=1 SV=1	Q91VA7	1.08	0.806042
Enoyl-CoA hydratase, mitochondrial OS=Mus musculus GN=Echs1 PE=1 SV=1	Q8BH95	0.948	0.962644
NADH dehydrogenase [ubiquinone] iron-sulfur protein 3, mitochondrial OS=Mus musculus GN=Ndufs3 PE=1 SV=2	Q9DCT2	1.119	0.907381
Pyruvate dehydrogenase protein X component, mitochondrial OS=Mus musculus GN=Pdhx PE=1 SV=1	Q8BKZ9	0.975	0.990877
Glycine amidinotransferase, mitochondrial OS=Mus musculus GN=Gatm PE=1 SV=1	Q9D964	1.038	0.99918
Thioredoxin, mitochondrial (Fragment) OS=Mus musculus GN=Txn2 PE=1 SV=1	G3UZY2	1.073	0.913694
Glutathione reductase, mitochondrial OS=Mus musculus GN=Gsr PE=1 SV=3	P47791	1.012	0.982014
Voltage-dependent anion-selective channel protein 2 (Fragment) OS=Mus musculus GN=Vdac2 PE=1 SV=1	G3UX26	0.856	0.446699
Cytochrome b-c1 complex subunit 1, mitochondrial OS=Mus musculus GN=Uqcrc1 PE=1 SV=2	Q9CZ13	1.092	0.853776
Succinate dehydrogenase [ubiquinone] flavoprotein subunit, mitochondrial OS=Mus musculus GN=Sdha PE=1 SV=1	Q8K2B3	0.978	0.995649
10 kDa heat shock protein, mitochondrial OS=Mus musculus GN=Hspe1 PE=1 SV=2	Q64433	0.869	0.629625
Mitochondrial import inner membrane translocase subunit Tim8 B OS=Mus musculus GN=Timm8b PE=1 SV=1	P62077	1.007	0.993171
Persulfide dioxygenase ETHE1, mitochondrial OS=Mus musculus GN=Ethe1 PE=1 SV=2	Q9DCM0	1.165	0.403265
Delta(3,5)-Delta(2,4)-dienoyl-CoA isomerase, mitochondrial OS=Mus musculus GN=Ech1 PE=1 SV=1	O35459	0.879	0.628331
Mitochondrial dynamics protein MID51 OS=Mus musculus GN=Mief1 PE=1 SV=1	Q8BGV8	0.995	0.964418
Succinyl-CoA:3-ketoacid coenzyme A transferase 1, mitochondrial OS=Mus musculus GN=Oxct1 PE=1 SV=1	Q9D0K2	0.991	0.998835
Cytochrome c oxidase subunit 6C OS=Mus musculus GN=Cox6c PE=1 SV=3	Q9CPQ1	0.795	0.288801
Oxygen-dependent coproporphyrinogen-III oxidase, mitochondrial OS=Mus musculus GN=Cpox PE=1 SV=2	P36552	1.056	0.982014
Mitochondrial fission 1 protein OS=Mus musculus GN=Fis1 PE=1 SV=1	Q9CQ92	0.903	0.77296
NADH dehydrogenase [ubiquinone] 1 alpha subcomplex assembly factor 3 OS=Mus musculus GN=Ndufaf3 PE=1 SV=1	Q9JKL4	1.135	0.913075
Citrate lyase subunit beta-like protein, mitochondrial OS=Mus musculus GN=Clybl PE=1 SV=2	Q8R4N0	1.04	0.931015
Succinate--CoA ligase [GDP-forming] subunit beta, mitochondrial OS=Mus musculus GN=Suclg2 PE=1 SV=3	Q9Z2I8	1.017	0.96987
Cytochrome c oxidase subunit NDUFA4 OS=Mus musculus GN=Ndufa4 PE=1 SV=2	Q62425	0.934	0.924036
Creatine kinase S-type, mitochondrial OS=Mus musculus GN=Ckmt2 PE=1 SV=1	Q6P8J7	1.148	0.8982
Hydroxyacyl-coenzyme A dehydrogenase, mitochondrial OS=Mus musculus GN=Hadh PE=1 SV=2	Q61425	0.933	0.919214
Presequence protease, mitochondrial OS=Mus musculus GN=Pitrm1 PE=1 SV=1	Q8K411	0.954	0.949078
A-kinase anchor protein 10, mitochondrial OS=Mus musculus GN=Akap10 PE=1 SV=3	O88845	1.062	0.993171
6.8 kDa mitochondrial proteolipid OS=Mus musculus GN=Mp68 PE=1 SV=1	P56379	0.755	0.0554627
3-ketoacyl-CoA thiolase, mitochondrial OS=Mus musculus GN=Acaa2 PE=1 SV=3	Q8BWT1	1.024	0.964147
LETM1 and EF-hand domain-containing protein 1, mitochondrial OS=Mus musculus GN=Letm1 PE=1 SV=1	Q9Z2I0	1.048	0.907381
Alanine--tRNA ligase, mitochondrial OS=Mus musculus GN=Aars2 PE=1 SV=1	Q14CH7	0.771	0.378956
Mitochondrial peptide methionine sulfoxide reductase OS=Mus musculus GN=Msra PE=1 SV=1	Q9D6Y7	1.127	0.829109
Acyl-coenzyme A thioesterase 9, mitochondrial OS=Mus musculus GN=Acot9 PE=1 SV=1	Q9R0X4	1.043	0.928202
Atypical kinase COQ8A, mitochondrial OS=Mus musculus GN=Coq8a PE=1 SV=2	Q60936
Glutaredoxin-related protein 5, mitochondrial OS=Mus musculus GN=Glrx5 PE=1 SV=2	Q80Y14	0.974	0.971933
Glutamyl-tRNA(Gln) amidotransferase subunit A, mitochondrial OS=Mus musculus GN=Qrsl1 PE=1 SV=1	Q9CZN8	1.134	0.917481
Tricarboxylate transport protein, mitochondrial OS=Mus musculus GN=Slc25a1 PE=1 SV=1	Q8JZU2	1.086	0.979474
Mitochondrial import receptor subunit TOM22 homolog OS=Mus musculus GN=Tomm22 PE=1 SV=3	Q9CPQ3	1.06	0.998835
Malate dehydrogenase, mitochondrial OS=Mus musculus GN=Mdh2 PE=1 SV=3	P08249	1.01	0.982733
Monofunctional C1-tetrahydrofolate synthase, mitochondrial OS=Mus musculus GN=Mthfd1l PE=1 SV=2	Q3V3R1	1.088	0.777793
Apoptosis-inducing factor 1, mitochondrial OS=Mus musculus GN=Aifm1 PE=1 SV=1	Q9Z0X1	0.978	0.990877
NAD kinase 2, mitochondrial OS=Mus musculus GN=Nadk2 PE=1 SV=2	Q8C5H8	1.143	0.53611
Succinate dehydrogenase assembly factor 1, mitochondrial OS=Mus musculus GN=Sdhaf1 PE=1 SV=1	Q3U276	0.911	0.831371
MICOS complex subunit MIC13 OS=Mus musculus GN=Mic13 PE=1 SV=1	Q8R404	0.956	0.91579
Cytochrome c oxidase subunit 7A2, mitochondrial OS=Mus musculus GN=Cox7a2 PE=1 SV=2	P48771	1.154	0.831282
Stress-70 protein, mitochondrial OS=Mus musculus GN=Hspa9 PE=1 SV=3	P38647	0.944	0.951832
Aconitate hydratase, mitochondrial OS=Mus musculus GN=Aco2 PE=1 SV=1	Q99KI0	1.081	0.802779
NADH dehydrogenase [ubiquinone] 1 subunit C2 OS=Mus musculus GN=Ndufc2 PE=1 SV=1	Q9CQ54	1.159	0.904416
Acyl-CoA dehydrogenase family member 9, mitochondrial OS=Mus musculus GN=Acad9 PE=1 SV=2	Q8JZN5	1.121	0.611401
NADH dehydrogenase [ubiquinone] flavoprotein 2, mitochondrial OS=Mus musculus GN=Ndufv2 PE=1 SV=2	Q9D6J6	1.08	0.964418
Ribosome-recycling factor, mitochondrial OS=Mus musculus GN=Mrrf PE=1 SV=1	Q9D6S7	1.111	0.904753
Aldehyde dehydrogenase X, mitochondrial OS=Mus musculus GN=Aldh1b1 PE=1 SV=1	Q9CZS1	0.997	0.990877
Cob(I)yrinic acid a,c-diamide adenosyltransferase, mitochondrial OS=Mus musculus GN=Mmab PE=1 SV=1	Q9D273	1.115	0.848541
UMP-CMP kinase 2, mitochondrial OS=Mus musculus GN=Cmpk2 PE=1 SV=2	Q3U5Q7	1.085	0.777983
Ubiquinone biosynthesis protein COQ9, mitochondrial OS=Mus musculus GN=Coq9 PE=1 SV=1	Q8K1Z0	1.005	0.997319
Glutamyl-tRNA(Gln) amidotransferase subunit C, mitochondrial OS=Mus musculus GN=Gatc PE=1 SV=1	Q8CBY0	1.271	0.521991
NADH dehydrogenase [ubiquinone] 1 alpha subcomplex subunit 13 OS=Mus musculus GN=Ndufa13 PE=1 SV=3	Q9ERS2	0.919	0.84284
Iron-sulfur cluster assembly 2 homolog, mitochondrial OS=Mus musculus GN=Isca2 PE=1 SV=2	Q9DCB8	1.102	0.777469
60 kDa heat shock protein, mitochondrial OS=Mus musculus GN=Hspd1 PE=1 SV=1	P63038	0.986	0.998983
Acylpyruvase FAHD1, mitochondrial OS=Mus musculus GN=Fahd1 PE=1 SV=2	Q8R0F8	0.966	0.964418
[Pyruvate dehydrogenase (acetyl-transferring)] kinase isozyme 3, mitochondrial OS=Mus musculus GN=Pdk3 PE=1 SV=1	Q922H2	1.022	0.975885
Cytochrome b-c1 complex subunit 2, mitochondrial OS=Mus musculus GN=Uqcrc2 PE=1 SV=1	Q9DB77	0.928	0.861782
Short/branched chain specific acyl-CoA dehydrogenase, mitochondrial OS=Mus musculus GN=Acadsb PE=1 SV=1	Q9DBL1	1.009	0.993171
Ornithine aminotransferase, mitochondrial OS=Mus musculus GN=Oat PE=1 SV=1	P29758	1.217	0.192392
Methylcrotonoyl-CoA carboxylase subunit alpha, mitochondrial OS=Mus musculus GN=Mccc1 PE=1 SV=2	Q99MR8	1.113	0.628998
Succinate dehydrogenase assembly factor 2, mitochondrial OS=Mus musculus GN=Sdhaf2 PE=1 SV=1	Q8C6I2	0.938	0.881551
5'(3')-deoxyribonucleotidase, mitochondrial OS=Mus musculus GN=Nt5m PE=1 SV=1	Q8VCE6	1.038	0.993171
ATP-dependent Clp protease ATP-binding subunit clpX-like, mitochondrial OS=Mus musculus GN=Clpx PE=1 SV=1	Q6P8N8	1.115	0.928202
3-hydroxyisobutyryl-CoA hydrolase, mitochondrial OS=Mus musculus GN=Hibch PE=1 SV=1	Q8QZS1	0.941	0.941062
Cytochrome b-c1 complex subunit 6, mitochondrial OS=Mus musculus GN=Uqcrh PE=1 SV=2	P99028	1.207	0.934344
Mitochondrial import inner membrane translocase subunit Tim8 A OS=Mus musculus GN=Timm8a1 PE=1 SV=1	Q9WVA2	1.061	0.971469
Glutaminase liver isoform, mitochondrial OS=Mus musculus GN=Gls2 PE=1 SV=2	Q571F8	1.139	0.990877
ATP synthase protein 8 OS=Mus musculus GN=Mtatp8 PE=1 SV=1	P03930	0.676	0.00634373
Pyruvate dehydrogenase E1 component subunit beta, mitochondrial OS=Mus musculus GN=Pdhb PE=1 SV=1	Q9D051	0.913	0.850377
Dynamin-like 120 kDa protein, mitochondrial OS=Mus musculus GN=Opa1 PE=1 SV=1	P58281	1.081	0.802021
ATPase inhibitor, mitochondrial OS=Mus musculus GN=Atpif1 PE=1 SV=2	O35143	0.779	0.106278
Adenylate kinase 2, mitochondrial OS=Mus musculus GN=Ak2 PE=1 SV=5	Q9WTP6	1.062	0.870012
Citrate synthase, mitochondrial OS=Mus musculus GN=Cs PE=1 SV=1	Q9CZU6	1.013	0.975052
Mitochondrial import inner membrane translocase subunit TIM50 OS=Mus musculus GN=Timm50 PE=1 SV=1	Q9D880	1.045	0.990877
Cytochrome c oxidase assembly factor 7 OS=Mus musculus GN=Coa7 PE=1 SV=1	Q921H9	1.088	0.949945
Enoyl-CoA delta isomerase 1, mitochondrial OS=Mus musculus GN=Eci1 PE=1 SV=2	P42125	0.927	0.8982
Mitochondrial amidoxime reducing component 2 OS=Mus musculus GN=Marc2 PE=1 SV=1	Q922Q1	0.826	0.368207
Isoleucine--tRNA ligase, mitochondrial OS=Mus musculus GN=Iars2 PE=1 SV=1	Q8BIJ6	1.035	0.934542
Leucine-rich PPR motif-containing protein, mitochondrial OS=Mus musculus GN=Lrpprc PE=1 SV=2	Q6PB66	0.927	0.8996
Acetyl-CoA acetyltransferase, mitochondrial OS=Mus musculus GN=Acat1 PE=1 SV=1	Q8QZT1	1.015	0.972383
COX assembly mitochondrial protein homolog OS=Mus musculus GN=Cmc1 PE=1 SV=1	Q9CPZ8	1.06	0.993171
Cytochrome c oxidase assembly factor 6 homolog OS=Mus musculus GN=Coa6 PE=1 SV=1	Q8BGD8	0.907	0.819804
Acyl-coenzyme A thioesterase 2, mitochondrial OS=Mus musculus GN=Acot2 PE=1 SV=2	Q9QYR9	0.982	0.998835
Phosphate carrier protein, mitochondrial OS=Mus musculus GN=Slc25a3 PE=1 SV=1	Q8VEM8	0.914	0.855503
Hemoglobin subunit alpha OS=Bos taurus GN=HBA PE=1 SV=2	P01966	1.193	0.841022
RNA binding protein fox-1 homolog 2 OS=Mus musculus GN=Rbfox2 PE=1 SV=2	Q8BP71	1.099	0.964418
Alpha-parvin OS=Mus musculus GN=Parva PE=1 SV=1	Q9EPC1	0.972	0.956508
Armadillo repeat-containing protein 1 OS=Mus musculus GN=Armc1 PE=1 SV=1	Q9D7A8	0.947	0.896258
Serine/threonine-protein kinase N1 OS=Mus musculus GN=Pkn1 PE=1 SV=3	P70268	1.11	0.959794
Rab proteins geranylgeranyltransferase component A 1 OS=Mus musculus GN=Chm PE=1 SV=1	Q9QXG2	1.033	0.998835
Inward rectifier potassium channel 16 OS=Mus musculus GN=Kcnj16 PE=1 SV=2	Q9Z307	1.035	0.998835
ER membrane protein complex subunit 10 OS=Mus musculus GN=Emc10 PE=1 SV=1	A0A0X1KG67	1.359	0.711822
ATP-binding cassette sub-family A member 2 OS=Mus musculus GN=Abca2 PE=1 SV=1	A2AJ26	1.443	0.193582
Tumor protein D52 (Fragment) OS=Mus musculus GN=Tpd52 PE=1 SV=1	D3Z7X7	0.9	0.747094
Olfactory receptor OS=Mus musculus GN=Olfr171 PE=3 SV=1	Q7TS51	0.971	0.959092
Cbx3 protein OS=Mus musculus GN=Cbx3 PE=1 SV=1	Q9DCC5	1.065	0.970555
Signal transducing adapter molecule 1 OS=Mus musculus GN=Stam PE=1 SV=3	P70297	0.942	0.906717
AMP deaminase OS=Mus musculus GN=Ampd3 PE=1 SV=1	A0A1L1SRX2	0.976	0.972383
Gamma-glutamyltranspeptidase 1 OS=Mus musculus GN=Ggt1 PE=1 SV=1	Q60928	1.122	0.896258
Protein FMC1 homolog OS=Mus musculus GN=Fmc1 PE=1 SV=1	Q9CR13	1.073	0.998835
CLIP-associating protein 1 OS=Mus musculus GN=Clasp1 PE=1 SV=2	E9Q6L0	1.011	0.998835
Calmodulin-regulated spectrin-associated protein 3 OS=Mus musculus GN=Camsap3 PE=1 SV=1	U5LHT8	0.976	0.962644
NAD-dependent protein deacetylase sirtuin-3 OS=Mus musculus GN=Sirt3 PE=1 SV=2	Q8R104	1.032	0.99661
N-acyl-phosphatidylethanolamine-hydrolyzing phospholipase D OS=Mus musculus GN=Napepld PE=1 SV=1	Q8BH82	1.151	0.86818
H-2 class I histocompatibility antigen, K-B alpha chain OS=Mus musculus GN=H2-K1 PE=1 SV=1	P01901	1.112	0.91896
Cholinephosphotransferase 1 OS=Mus musculus GN=Chpt1 PE=1 SV=1	D3YU39	1.128	0.883372
Neural cell adhesion molecule 2 OS=Mus musculus GN=Ncam2 PE=1 SV=1	O35136	0.894	0.72545
CDK5 regulatory subunit-associated protein 3 OS=Mus musculus GN=Cdk5rap3 PE=1 SV=1	Q99LM2	0.871	0.631172
Vacuolar protein sorting-associated protein 4B OS=Mus musculus GN=Vps4b PE=1 SV=2	P46467	0.99	0.972811
Dynactin subunit 1 OS=Mus musculus GN=Dctn1 PE=1 SV=1	E9Q3M3	1.063	0.861588
Toll-like receptor OS=Mus musculus GN=Tlr2 PE=1 SV=1	G3X8Y8	1.521	0.344732
Inositol hexakisphosphate kinase 2 OS=Mus musculus GN=Ip6k2 PE=2 SV=2	Q80V72	0.713	0.0675192
AN1-type zinc finger protein 6 (Fragment) OS=Mus musculus GN=Zfand6 PE=1 SV=1	A0A140LIM2	1.024	0.995649
Adaptin ear-binding coat-associated protein 1 OS=Mus musculus GN=Necap1 PE=1 SV=2	Q9CR95	0.932	0.920261
Breast cancer anti-estrogen resistance protein 1 OS=Mus musculus GN=Bcar1 PE=1 SV=2	Q61140	0.951	0.896258
Ubiquitin-like modifier-activating enzyme ATG7 OS=Mus musculus GN=Atg7 PE=1 SV=1	S4R2T5	1.086	0.894299
Phospholipase DDHD2 OS=Mus musculus GN=Ddhd2 PE=1 SV=1	A0A1B0GSA5	1.071	0.972383
COMM domain-containing protein 3 OS=Mus musculus GN=Commd3 PE=1 SV=1	Q63829	1.084	0.954284
Putative uncharacterized protein OS=Mus musculus GN=Snx1 PE=1 SV=1	Q6NZD2	0.927	0.867523
Gamma-aminobutyric acid receptor subunit alpha-3 OS=Mus musculus GN=Gabra3 PE=1 SV=1	P26049	1.009	0.990877
Ubiquitin-conjugating enzyme E2 H OS=Mus musculus GN=Ube2h PE=1 SV=1	E9Q3U1	0.819	0.468058
Muscleblind-like protein 1 OS=Mus musculus GN=Mbnl1 PE=1 SV=1	A0A0A6YWB0	1.039	0.998835
Serine/threonine-protein kinase STK11 OS=Mus musculus GN=Stk11 PE=1 SV=1	E9Q811	1.03	0.990877
Histidine-rich glycoprotein OS=Mus musculus GN=Hrg PE=1 SV=1	A0A0R4J039	1.383	0.189447
Thy-1 membrane glycoprotein (Fragment) OS=Mus musculus GN=Thy1 PE=1 SV=1	A0A1L1SUX8	1.012	0.99918
Signal recognition particle subunit SRP68 OS=Mus musculus GN=Srp68 PE=1 SV=2	Q8BMA6	0.918	0.80499
Protein disulfide-isomerase A6 OS=Mus musculus GN=Pdia6 PE=1 SV=1	Q3TML0	1.15	0.498897
Tudor and KH domain-containing protein OS=Mus musculus GN=Tdrkh PE=1 SV=1	A0A0G2JFB2	1.092	0.990877
Glutaredoxin-1 OS=Mus musculus GN=Glrx PE=1 SV=3	Q9QUH0	0.905	0.737359
Phosphatidylinositol 4-kinase beta OS=Mus musculus GN=Pi4kb PE=1 SV=1	E9Q8A3
Collagen type IV alpha-3-binding protein OS=Mus musculus GN=Col4a3bp PE=1 SV=1	Q9EQG9	0.926	0.828472
Nascent polypeptide-associated complex subunit alpha, muscle-specific form OS=Mus musculus GN=Naca PE=1 SV=2	P70670	0.952	0.924715
Bifunctional polynucleotide phosphatase/kinase OS=Mus musculus GN=Pnkp PE=1 SV=2	Q9JLV6	1.056	0.995649
Histone H1.4 OS=Mus musculus GN=Hist1h1e PE=1 SV=2	P43274	0.933	0.855503
ADP-ribosylation factor interacting protein 2, isoform CRA_d OS=Mus musculus GN=Arfip2 PE=1 SV=1	A0A1B0GSM3
Probable cationic amino acid transporter OS=Mus musculus GN=Slc7a14 PE=1 SV=1	Q8BXR1	0.931	0.885612
Sodium/potassium-transporting ATPase subunit alpha OS=Mus musculus GN=Atp1a3 PE=1 SV=1	A0A0G2JGX4	0.754	0.0437327
Membrane-associated guanylate kinase, WW and PDZ domain-containing protein 1 OS=Mus musculus GN=Magi1 PE=1 SV=1	E9PZ12	1.046	0.993171
Acyl-coenzyme A thioesterase 13 OS=Mus musculus GN=Acot13 PE=1 SV=1	Q9CQR4	0.984	0.994934
Regulation of nuclear pre-mRNA domain-containing protein 2 OS=Mus musculus GN=Rprd2 PE=1 SV=1	Q6NXI6
Plexin-B2 OS=Mus musculus GN=Plxnb2 PE=1 SV=1	B2RXS4	1.028	0.993171
SUMO-conjugating enzyme OS=Mus musculus GN=Ube2i PE=1 SV=1	G3UZL6	0.741	0.121838
Angiotensinogen OS=Mus musculus GN=Agt PE=1 SV=1	P11859	1.214	0.629625
Ferritin OS=Mus musculus GN=Ftl1 PE=1 SV=1	A0A1B0GR60	1.118	0.91896
Multifunctional protein ADE2 OS=Mus musculus GN=Paics PE=1 SV=4	Q9DCL9	1.074	0.823016
Serine/threonine-protein kinase Nek6 OS=Mus musculus GN=Nek6 PE=1 SV=1	A2ATN9	0.703	0.00636104
Caspase-3 OS=Mus musculus GN=Casp3 PE=1 SV=1	P70677	1.279	0.644364
Family with sequence similarity 98, member C (Fragment) OS=Mus musculus GN=Fam98c PE=1 SV=1	F6ZXW2	1.009	0.986163
Solute carrier family 35 member F6 OS=Mus musculus GN=Slc35f6 PE=1 SV=1	A0A0G2JEG3	0.735	0.217623
GRB10-interacting GYF protein 1 OS=Mus musculus GN=Gigyf1 PE=1 SV=2	Q99MR1	1.157	0.961157
N-terminal EF-hand calcium-binding protein 2 OS=Mus musculus GN=Necab2 PE=1 SV=1	Q91ZP9	1.181	0.711822
Ethanolamine-phosphate cytidylyltransferase OS=Mus musculus GN=Pcyt2 PE=1 SV=1	Q922E4	0.99	0.998835
Proteasome subunit alpha type-2 OS=Mus musculus GN=Psma2 PE=1 SV=3	P49722	0.954	0.942263
78 kDa glucose-regulated protein OS=Mus musculus GN=Hspa5 PE=1 SV=3	P20029	0.951	0.962827
Gamma-aminobutyric acid (GABA) A receptor, subunit epsilon OS=Mus musculus GN=Gabre PE=3 SV=1	A2AMW3	0.997	0.96987
PCTP-like protein OS=Mus musculus GN=Stard10 PE=1 SV=1	E9PVP0	1.053	0.972552
Cytoplasmic dynein 1 intermediate chain 2 OS=Mus musculus GN=Dync1i2 PE=1 SV=1	A2BFF8	1.023	0.964418
Nuclear factor 1 OS=Mus musculus GN=Nfia PE=1 SV=1	B1AUB9	1.04	0.998835
SET-binding factor 2 OS=Mus musculus GN=Sbf2 PE=1 SV=1	E9Q305	0.986	0.962697
Ras-related protein Rab-10 OS=Mus musculus GN=Rab10 PE=1 SV=1	P61027	0.851	0.384909
Mtmr2 protein OS=Mus musculus GN=Mtmr2 PE=1 SV=1	Q6P572	1.122	0.84284
Nuclease-sensitive element-binding protein 1 (Fragment) OS=Mus musculus GN=Ybx1 PE=1 SV=1	A2BGG7	0.874	0.750211
Protein unc-50 homolog OS=Mus musculus GN=Unc50 PE=2 SV=1	Q9CQ61	1.165	0.861782
Proline-rich AKT1 substrate 1 (Fragment) OS=Mus musculus GN=Akt1s1 PE=1 SV=1	A0A140LHA0	0.885	0.787111
E3 ubiquitin-protein ligase Trim36 OS=Mus musculus GN=Trim36 PE=1 SV=2	Q80WG7	1.147	0.896358
Mevalonate kinase OS=Mus musculus GN=Mvk PE=1 SV=1	Q3UEB4	0.912	0.777793
Ubiquitin carboxyl-terminal hydrolase 5 OS=Mus musculus GN=Usp5 PE=1 SV=1	P56399	1.05	0.904753
Vinculin OS=Mus musculus GN=Vcl PE=1 SV=4	Q64727	0.986	0.99918
Calcium/calmodulin-dependent protein kinase type II subunit alpha OS=Mus musculus GN=Camk2a PE=1 SV=2	P11798	1.01	0.990877
N-acetylaspartylglutamate synthase A OS=Mus musculus GN=Rimkla PE=1 SV=1	Q6PFX8	1.054	0.998835
Transcription intermediary factor 1-beta OS=Mus musculus GN=Trim28 PE=1 SV=3	Q62318	0.957	0.962697
Peptidyl-prolyl cis-trans isomerase CWC27 homolog OS=Mus musculus GN=Cwc27 PE=1 SV=1	Q3TKY6	1.275	0.696315
Diamine acetyltransferase 2 OS=Mus musculus GN=Sat2 PE=1 SV=1	Q6P8J2	1.017	0.998835
Inactive dipeptidyl peptidase 10 OS=Mus musculus GN=Dpp10 PE=1 SV=1	E9QN98	0.975	0.962644
BAG family molecular chaperone regulator 1 OS=Mus musculus GN=Bag1 PE=1 SV=3	Q60739
Septin-7 OS=Mus musculus GN=Sept7 PE=1 SV=2	E9Q1G8	0.971	0.991659
Roundabout homolog 1 OS=Mus musculus GN=Robo1 PE=1 SV=1	G5E843	1.017	0.98699
CD44 antigen OS=Mus musculus GN=Cd44 PE=1 SV=1	A2APM3	0.915	0.818429
Phosphoribosyl pyrophosphate synthase-associated protein 1 OS=Mus musculus GN=Prpsap1 PE=1 SV=1	Q9D0M1	1.215	0.5236
CUGBP Elav-like family member 2 OS=Mus musculus GN=Celf2 PE=1 SV=1	S4R2U7	1.079	0.962697
Band 4.1-like protein 3 OS=Mus musculus GN=Epb41l3 PE=1 SV=1	Q9WV92	0.998	0.993171
NHL repeat-containing protein 2 OS=Mus musculus GN=Nhlrc2 PE=1 SV=1	Q8BZW8	0.93	0.86519
Plasma alpha-L-fucosidase OS=Mus musculus GN=Fuca2 PE=1 SV=1	Q99KR8	0.88	0.759148
Spliceosome RNA helicase Ddx39b OS=Mus musculus GN=Ddx39b PE=1 SV=1	Q9Z1N5	1.119	0.582637
Beta-2-syntrophin OS=Mus musculus GN=Sntb2 PE=1 SV=2	Q61235	1.223	0.770955
Immunoglobulin kappa chain variable 1-88 (Fragment) OS=Mus musculus GN=Igkv1-88 PE=4 SV=2	A0A140T8N1	0.839	0.483251
TBC1 domain family member 10A OS=Mus musculus GN=Tbc1d10a PE=1 SV=1	Q5SPX8	1.181	0.751624
Uncharacterized protein OS=Mus musculus GN=Gm1661 PE=1 SV=1	E9Q963	0.739	0.0270394
Syntaxin-16 OS=Mus musculus GN=Stx16 PE=1 SV=3	Q8BVI5	1.011	0.990877
Twinfilin-2 OS=Mus musculus GN=Twf2 PE=1 SV=1	Q9Z0P5	0.939	0.87042
Transcriptional coactivator YAP1 OS=Mus musculus GN=Yap1 PE=1 SV=1	G3UYV4	1.088	0.979275
cAMP-dependent protein kinase type II-alpha regulatory subunit OS=Mus musculus GN=Prkar2a PE=1 SV=1	A0A0A6YX73	0.944	0.940082
Pyridoxal kinase OS=Mus musculus GN=Pdxk PE=1 SV=1	Q8K183	1.026	0.962644
Calcium-binding protein 39 OS=Mus musculus GN=Cab39 PE=1 SV=2	Q06138	0.92	0.881943
Pyruvate carboxylase OS=Mus musculus GN=Pcx PE=1 SV=1	G5E8R3	1.119	0.634878
Macrophage erythroblast attacher OS=Mus musculus GN=Maea PE=1 SV=1	Q4VC33	0.906	0.819754
UPF0462 protein C4orf33 homolog OS=Mus musculus GN=D3Ertd751e PE=1 SV=1	D6RH74	0.808	0.347273
Riboflavin kinase OS=Mus musculus GN=Rfk PE=1 SV=2	Q8CFV9	1.029	0.998117
Protein disulfide-isomerase OS=Mus musculus GN=P4hb PE=1 SV=2	P09103	0.907	0.821274
LIM and senescent cell antigen-like-containing domain protein OS=Mus musculus GN=Lims1 PE=1 SV=2	Q9D7B2	0.908	0.775065
Septin-5 OS=Mus musculus GN=Sept5 PE=1 SV=2	Q9Z2Q6	1.067	0.850106
Mitogen-activated protein kinase kinase kinase 3 OS=Mus musculus GN=Map3k3 PE=1 SV=1	Q61084	1.263	0.248747
Actin-related protein 2/3 complex subunit 1A OS=Mus musculus GN=Arpc1a PE=1 SV=1	Q9R0Q6	0.972	0.993171
Ceramide-1-phosphate transfer protein OS=Mus musculus GN=Cptp PE=1 SV=1	Q8BS40	1.031	0.993171
Synergin gamma OS=Mus musculus GN=Synrg PE=1 SV=1	V9GXD9
Cytosolic 5'-nucleotidase 1A OS=Mus musculus GN=Nt5c1a PE=1 SV=1	A3KFX0	1.445	0.224488
Ubiquitin carboxyl-terminal hydrolase 8 OS=Mus musculus GN=Usp8 PE=1 SV=1	A2AI52	1.148	0.643543
Cytidine monophospho-N-acetylneuraminic acid synthetase OS=Mus musculus GN=Cmas PE=1 SV=1	A0A0R4J0B4	1	0.996898
Striatin-4 OS=Mus musculus GN=Strn4 PE=1 SV=2	P58404	1.027	0.995649
Poly [ADP-ribose] polymerase OS=Mus musculus GN=Parp3 PE=1 SV=1	Q8CFB8	1.08	0.982014
Pre-mRNA-splicing factor ATP-dependent RNA helicase DHX15 OS=Mus musculus GN=Dhx15 PE=1 SV=1	A0A0G2JG10	1.221	0.6555
Mitogen-activated protein kinase kinase kinase kinase 4 OS=Mus musculus GN=Map4k4 PE=1 SV=1	A0A0A6YW53	1.29	0.606328
Neuronal pentraxin-1 OS=Mus musculus GN=Nptx1 PE=1 SV=1	Q62443	1.191	0.644899
Vacuolar protein sorting-associated protein 52 homolog OS=Mus musculus GN=Vps52 PE=1 SV=1	Q8C754	1.095	0.907381
Rho GTPase-activating protein 21 OS=Mus musculus GN=Arhgap21 PE=1 SV=1	A0A0A0MQE8	1.152	0.931015
Cell surface glycoprotein MUC18 OS=Mus musculus GN=Mcam PE=1 SV=1	Q8R2Y2	1.043	0.998835
Protein LBH OS=Mus musculus GN=Lbh PE=1 SV=1	Q9CX60	1.129	0.924715
cAMP-regulated phosphoprotein 19 OS=Mus musculus GN=Arpp19 PE=1 SV=1	E9Q827	1.09	0.96987
Sodium channel subunit beta-4 OS=Mus musculus GN=Scn4b PE=1 SV=1	Q7M729	0.892	0.701155
Prefoldin subunit 3 OS=Mus musculus GN=Vbp1 PE=1 SV=2	P61759	1	0.998835
Cullin-4A OS=Mus musculus GN=Cul4a PE=1 SV=1	Q3TCH7	1.144	0.802779
Annexin A3 OS=Mus musculus GN=Anxa3 PE=1 SV=4	O35639	1.051	0.8996
Peroxisomal acyl-coenzyme A oxidase 1 (Fragment) OS=Mus musculus GN=Acox1 PE=1 SV=1	A2A848	1.11	0.964418
DnaJ homolog subfamily A member 4 OS=Mus musculus GN=Dnaja4 PE=1 SV=1	Q9JMC3	1.028	0.997319
Disks large homolog 3 OS=Mus musculus GN=Dlg3 PE=1 SV=1	A2BEF2	1.013	0.993171
Serine/threonine-protein kinase WNK2 OS=Mus musculus GN=Wnk2 PE=1 SV=1	E9QM73	1.136	0.78716
FSD1-like protein OS=Mus musculus GN=Fsd1l PE=1 SV=2	Q8BYN5	1.073	0.931015
Biogenesis of lysosome-related organelles complex 1 subunit 1 OS=Mus musculus GN=Bloc1s1 PE=1 SV=1	D3YVM8	1.138	0.91896
WD repeat-containing protein 11 (Fragment) OS=Mus musculus GN=Wdr11 PE=1 SV=1	A0A0U1RPD4	0.846	0.627794
Scrapie-responsive protein 1 OS=Mus musculus GN=Scrg1 PE=2 SV=1	O88745
Basic leucine zipper and W2 domain-containing protein 2 OS=Mus musculus GN=Bzw2 PE=1 SV=1	Q91VK1	1.175	0.847836
Cytochrome P450, family 4, subfamily f, polypeptide 40 OS=Mus musculus GN=Cyp4f40 PE=1 SV=1	G3UW81	0.991	0.96987
Ceramide synthase 2 OS=Mus musculus GN=Cers2 PE=1 SV=1	Q924Z4	1.145	0.773854
Complement factor H OS=Mus musculus GN=Cfh PE=1 SV=2	P06909	1.295	0.46708
Aspartate--tRNA ligase, cytoplasmic OS=Mus musculus GN=Dars PE=1 SV=2	Q922B2	1.065	0.857862
Reticulon (Fragment) OS=Mus musculus GN=Rtn1 PE=1 SV=1	A3QM89	1.096	0.711822
Methionine--tRNA ligase, cytoplasmic OS=Mus musculus GN=Mars PE=1 SV=1	E9QB02	1.015	0.998835
DnaJ homolog subfamily C member 24 (Fragment) OS=Mus musculus GN=Dnajc24 PE=1 SV=1	F7CGC9
Disintegrin and metalloproteinase domain-containing protein 9 OS=Mus musculus GN=Adam9 PE=1 SV=1	A0A140LHU0	1.046	0.998835
Putative uncharacterized protein OS=Mus musculus GN=Rapgef1 PE=1 SV=1	Q3UHC1	1.012	0.981642
Probable global transcription activator SNF2L2 (Fragment) OS=Mus musculus GN=Smarca2 PE=1 SV=1	A0A140LJK1
Histidine triad nucleotide-binding protein 1 OS=Mus musculus GN=Hint1 PE=1 SV=3	P70349	1.03	0.956508
Homer protein homolog 1 OS=Mus musculus GN=Homer1 PE=1 SV=1	E9Q0I7	1.097	0.949945
Histone H2B type 1-B OS=Mus musculus GN=Hist1h2bb PE=1 SV=3	Q64475	1.002	0.998835
Glial fibrillary acidic protein OS=Mus musculus GN=Gfap PE=1 SV=4	P03995	0.862	0.596603
Selenocysteine-specific elongation factor OS=Mus musculus GN=Eefsec PE=1 SV=1	A0A0N4SUV6	1.14	0.916673
MCG134445, isoform CRA_a OS=Mus musculus GN=Mroh1 PE=1 SV=1	G3XA21
Protein Hikeshi OS=Mus musculus GN=Hikeshi PE=1 SV=1	D3YU13	0.903	0.805658
Pyruvate kinase PKM OS=Mus musculus GN=Pkm PE=1 SV=4	P52480	0.929	0.907381
Protein FAM134C OS=Mus musculus GN=Fam134c PE=1 SV=1	Q9CQV4	0.845	0.565255
Crmp1 protein OS=Mus musculus GN=Crmp1 PE=1 SV=1	Q6P1J1	0.956	0.967306
Rho guanine nucleotide exchange factor 7 OS=Mus musculus GN=Arhgef7 PE=1 SV=2	Q9ES28	0.942	0.893964
Aftiphilin (Fragment) OS=Mus musculus GN=Aftph PE=1 SV=1	H3BKM5	1.312	0.62906
Sialic acid synthase OS=Mus musculus GN=Nans PE=1 SV=1	Q99J77	0.964	0.964418
Serine/arginine repetitive matrix protein 1 OS=Mus musculus GN=Srrm1 PE=1 SV=1	E9PUK6
Secretogranin-2 OS=Mus musculus GN=Scg2 PE=1 SV=1	Q03517	0.988	0.998835
Nucleophosmin OS=Mus musculus GN=Npm1 PE=1 SV=1	Q61937	0.856	0.527889
UPF0565 protein C2orf69 homolog OS=Mus musculus PE=2 SV=3	Q9D9H8	0.898	0.77296
Tyrosine--tRNA ligase, cytoplasmic OS=Mus musculus GN=Yars PE=1 SV=3	Q91WQ3	0.951	0.963641
Acylphosphatase OS=Mus musculus GN=Acyp1 PE=1 SV=1	E9QJT5	0.956	0.96987
Constitutive coactivator of PPAR-gamma-like protein 2 OS=Mus musculus GN=Fam120c PE=1 SV=3	Q8C3F2	1.123	0.963197
WD repeat-containing protein 34 OS=Mus musculus GN=Wdr34 PE=1 SV=2	Q5U4F6
CDGSH iron-sulfur domain-containing protein 2 OS=Mus musculus GN=Cisd2 PE=1 SV=1	Q9CQB5	0.972	0.962644
Dynamin-2 OS=Mus musculus GN=Dnm2 PE=1 SV=1	Q3TCR7	0.939	0.907381
Diphosphoinositol polyphosphate phosphohydrolase 1 OS=Mus musculus GN=Nudt3 PE=1 SV=1	Q9JI46	1.096	0.702457
Arf-GAP with SH3 domain, ANK repeat and PH domain-containing protein 1 OS=Mus musculus GN=Asap1 PE=1 SV=1	H3BJY2	0.875	0.576701
Hematopoietic lineage cell-specific protein OS=Mus musculus GN=Hcls1 PE=1 SV=2	P49710	1.053	0.986022
BRISC and BRCA1-A complex member 1 OS=Mus musculus GN=Babam1 PE=1 SV=1	Q3UI43	0.924	0.816129
Thioredoxin domain-containing protein 9 (Fragment) OS=Mus musculus GN=Txndc9 PE=1 SV=1	A0A0A6YWP9	1.194	0.747094
Actin-related protein 2/3 complex subunit 2 OS=Mus musculus GN=Arpc2 PE=1 SV=3	Q9CVB6	0.937	0.931015
ATPase family AAA domain-containing protein 1 OS=Mus musculus GN=Atad1 PE=1 SV=1	Q9D5T0	0.989	0.962644
COMM domain-containing protein 7 OS=Mus musculus GN=Commd7 PE=1 SV=1	Q8BG94	0.981	0.96987
Ryanodine receptor 2 OS=Mus musculus GN=Ryr2 PE=1 SV=1	E9Q401	1.043	0.998835
5'-nucleotidase domain-containing protein 3 OS=Mus musculus GN=Nt5dc3 PE=1 SV=1	Q3UHB1	1.095	0.760891
Bcl-2-like protein 1 (Fragment) OS=Mus musculus GN=Bcl2l1 PE=1 SV=1	Q9QWX2	0.939	0.886673
Alcohol dehydrogenase [NADP(+)] OS=Mus musculus GN=Akr1a1 PE=1 SV=3	Q9JII6	1.092	0.764742
Adhesion G protein-coupled receptor L2 OS=Mus musculus GN=Adgrl2 PE=1 SV=1	A0A0G2JDE3
Sodium-coupled neutral amino acid transporter 3 OS=Mus musculus GN=Slc38a3 PE=1 SV=1	Q9DCP2	1.051	0.995649
NAD-dependent protein deacetylase sirtuin-2 OS=Mus musculus GN=Sirt2 PE=1 SV=2	Q8VDQ8	1.034	0.947622
Guanine nucleotide-binding protein subunit beta-4 OS=Mus musculus GN=Gnb4 PE=1 SV=4	P29387	0.836	0.482245
DNA segment, Chr 16, human D22S680E, expressed, isoform CRA_c OS=Mus musculus GN=Tango2 PE=1 SV=1	Q8BTN3	1.249	0.576701
2'-deoxynucleoside 5'-phosphate N-hydrolase 1 OS=Mus musculus GN=Dnph1 PE=1 SV=2	Q80VJ3	1.171	0.906717
Adenylate kinase isoenzyme 5 (Fragment) OS=Mus musculus GN=Ak5 PE=1 SV=1	A0A0G2JGN7	1.039	0.99918
Glucosylceramidase OS=Mus musculus GN=Gba PE=1 SV=1	A0A0G2JDK2	0.972	0.962697
SR-related CTD-associated factor 4 OS=Mus musculus GN=Scaf4 PE=1 SV=1	Q6PFF0	1.052	0.990877
tRNA-splicing ligase RtcB homolog OS=Mus musculus GN=Rtcb PE=1 SV=1	Q99LF4	0.913	0.806422
Adenylate cyclase type 9 OS=Mus musculus GN=Adcy9 PE=1 SV=1	P51830	0.917	0.84284
Potassium voltage-gated channel subfamily A member 1 OS=Mus musculus GN=Kcna1 PE=1 SV=1	P16388	0.909	0.803391
Inhibitor of nuclear factor kappa-B kinase subunit beta OS=Mus musculus GN=Ikbkb PE=1 SV=1	O88351	0.93	0.888103
Platelet-activating factor acetylhydrolase IB subunit gamma OS=Mus musculus GN=Pafah1b3 PE=1 SV=1	Q61205	1.048	0.915451
Protein archease OS=Mus musculus GN=Zbtb8os PE=1 SV=1	B2KGA7	1.041	0.990877
Transcriptional repressor p66 alpha OS=Mus musculus GN=Gatad2a PE=1 SV=1	E9QMN5	1.022	0.991659
Microtubule-associated protein RP/EB family member 2 (Fragment) OS=Mus musculus GN=Mapre2 PE=1 SV=1	D3YYK8	0.989	0.998835
Protein phosphatase inhibitor 2 OS=Mus musculus GN=Ppp1r2 PE=1 SV=3	Q9DCL8	0.94	0.896258
Putative uncharacterized protein OS=Mus musculus GN=Xpnpep1 PE=1 SV=1	Q3UE92	1.004	0.996898
MCG6979, isoform CRA_a OS=Mus musculus GN=0610009B22Rik PE=2 SV=1	Q8R3W2	1.011	0.979275
Probable aminopeptidase NPEPL1 OS=Mus musculus GN=Npepl1 PE=1 SV=1	Q6NSR8	1.014	0.998835
Dysferlin OS=Mus musculus GN=Dysf PE=1 SV=1	A0A0N4SWH3	1.085	0.990877
Protein jagunal homolog 1 OS=Mus musculus GN=Jagn1 PE=1 SV=2	Q5XKN4	0.868	0.619714
Intracellular hyaluronan-binding protein 4 OS=Mus musculus GN=Habp4 PE=1 SV=2	Q9JKS5	1.21	0.680199
Copper chaperone for superoxide dismutase OS=Mus musculus GN=Ccs PE=1 SV=1	Q9WU84	0.995	0.971469
Cytohesin 2 OS=Mus musculus GN=Cyth2 PE=1 SV=1	Q99KH2	1.254	0.774133
ER membrane protein complex subunit 7 OS=Mus musculus GN=Emc7 PE=1 SV=1	Q9EP72	1.059	0.998835
CKLF-like MARVEL transmembrane domain-containing protein 4 OS=Mus musculus GN=Cmtm4 PE=1 SV=1	Q8CJ61	1.007	0.991659
DNA helicase MCM9 OS=Mus musculus GN=Mcm9 PE=1 SV=2	Q2KHI9	1.404	0.0437327
Serrate RNA effector molecule homolog OS=Mus musculus GN=Srrt PE=1 SV=1	Q99MR6	1.116	0.913004
Ankyrin repeat domain-containing protein 34C OS=Mus musculus GN=Ankrd34c PE=1 SV=1	Q8BLB8	1.389	0.167312
Methylosome protein 50 OS=Mus musculus GN=Wdr77 PE=1 SV=1	Q99J09	1.241	0.606328
Epidermal growth factor receptor substrate 15 OS=Mus musculus GN=Eps15 PE=1 SV=1	F6W2Q5	1.221	0.613859
Ectonucleoside triphosphate diphosphohydrolase 5 OS=Mus musculus GN=Entpd5 PE=1 SV=1	Q3TQC7	1.016	0.993171
UPF0585 protein C16orf13 homolog OS=Mus musculus PE=1 SV=1	Q9DCS2	0.976	0.982014
Synaptophysin-like protein OS=Mus musculus GN=Sypl PE=1 SV=1	D6RFU9
Engulfment and cell motility protein 2 OS=Mus musculus GN=Elmo2 PE=1 SV=1	Q8BHL5	1.189	0.769618
Manganese-transporting ATPase 13A1 OS=Mus musculus GN=Atp13a1 PE=1 SV=2	Q9EPE9
Putative uncharacterized protein OS=Mus musculus GN=Rab37 PE=1 SV=1	Q8BQX0	0.958	0.913694
Leucine-rich repeat and coiled-coil domain-containing protein 1 OS=Mus musculus GN=Lrrcc1 PE=1 SV=1	E9QNC6	1.123	0.907381
Ig kappa chain V-V region HP 123E6 OS=Mus musculus PE=1 SV=1	P01646	1.294	0.601226
Dynamin-1 OS=Mus musculus GN=Dnm1 PE=1 SV=2	P39053	1.127	0.606328
Phosphodiesterase OS=Mus musculus GN=Pde2a PE=1 SV=1	Q5PR72	1.114	0.931015
Ubiquitin carboxyl-terminal hydrolase 10 OS=Mus musculus GN=Usp10 PE=1 SV=3	P52479	0.799	0.306957
Integral membrane protein 2C OS=Mus musculus GN=Itm2c PE=1 SV=2	Q91VK4	1.577	0.0682665
TBC1 domain family member 5 OS=Mus musculus GN=Tbc1d5 PE=1 SV=2	Q80XQ2	1.248	0.588683
Acyl-CoA-binding domain-containing protein 6 OS=Mus musculus GN=Acbd6 PE=1 SV=2	Q9D061	0.978	0.962644
Heterogeneous nuclear ribonucleoprotein D0 OS=Mus musculus GN=Hnrnpd PE=1 SV=2	Q60668	0.996	0.999445
Hsp70-binding protein 1 OS=Mus musculus GN=Hspbp1 PE=1 SV=1	Q99P31	1.037	0.993171
Lamina-associated polypeptide 2, isoforms beta/delta/epsilon/gamma OS=Mus musculus GN=Tmpo PE=1 SV=4	Q61029
Ras-related protein Rab-1A OS=Mus musculus GN=Rab1A PE=1 SV=3	P62821	0.885	0.71884
Programmed cell death protein 10 OS=Mus musculus GN=Pdcd10 PE=1 SV=1	Q8VE70	1.251	0.316641
Complexin-2 OS=Mus musculus GN=Cplx2 PE=1 SV=1	P84086	1.034	0.97403
Septin-8 OS=Mus musculus GN=Sept8 PE=1 SV=1	B7ZC46	0.935	0.928202
Pecanex-like protein 1 OS=Mus musculus GN=Pcnx1 PE=1 SV=3	Q9QYC1	0.971	0.962644
Protein O-GlcNAcase OS=Mus musculus GN=Mgea5 PE=1 SV=2	Q9EQQ9	1.088	0.888103
Trifunctional purine biosynthetic protein adenosine-3 OS=Mus musculus GN=Gart PE=1 SV=3	Q64737	0.974	0.990877
Mesencephalic astrocyte-derived neurotrophic factor OS=Mus musculus GN=Manf PE=1 SV=1	Q9CXI5	0.833	0.407093
All-trans-retinol 13,14-reductase OS=Mus musculus GN=Retsat PE=1 SV=1	H3BJ51	1.265	0.87042
Transportin-1 OS=Mus musculus GN=Tnpo1 PE=1 SV=2	Q8BFY9	0.934	0.891075
IQ motif and SEC7 domain-containing protein 3 OS=Mus musculus GN=Iqsec3 PE=1 SV=1	Q3TES0	0.865	0.606328
ELKS/Rab6-interacting/CAST family member 1 OS=Mus musculus GN=Erc1 PE=1 SV=1	F8VPM7
Glutathione S-transferase mu 4 OS=Mus musculus GN=Gstm4 PE=1 SV=1	Q8R5I6
Beta-parvin OS=Mus musculus GN=Parvb PE=1 SV=1	Q9ES46
Clustered mitochondria protein homolog OS=Mus musculus GN=Cluh PE=1 SV=1	A0A0R4J140	1.082	0.888103
WD repeat domain phosphoinositide-interacting protein 4 (Fragment) OS=Mus musculus GN=Wdr45 PE=1 SV=1	A0A140LJ16	1.146	0.860744
Transmembrane protein 50B OS=Mus musculus GN=Tmem50b PE=1 SV=1	Q9D1X9	1.026	0.99661
Zinc finger, BED type-containing 5 (Fragment) OS=Mus musculus GN=Zbed5 PE=4 SV=8	D3Z5B1	1.124	0.895214
Galanin receptor type 3 OS=Mus musculus GN=Galr3 PE=2 SV=2	O88853	1.005	0.972552
Peptidyl-prolyl cis-trans isomerase FKBP2 OS=Mus musculus GN=Fkbp2 PE=1 SV=1	P45878	0.983	0.995649
BRISC complex subunit Abro1 (Fragment) OS=Mus musculus GN=Fam175b PE=1 SV=2	D3Z4D8	0.929	0.875018
Phosphatidylinositol 3-kinase OS=Mus musculus GN=Pik3c3 PE=1 SV=1	E9QLS6	0.977	0.964418
ER membrane protein complex subunit 8 OS=Mus musculus GN=Emc8 PE=1 SV=1	O70378	1.06	0.998835
Ras GTPase-activating-like protein IQGAP1 OS=Mus musculus GN=Iqgap1 PE=1 SV=2	Q9JKF1	0.914	0.818783
NFX1-type zinc finger-containing protein 1 (Fragment) OS=Mus musculus GN=Znfx1 PE=1 SV=1	A2A5R4	1.115	0.982014
Phosphoinositide phospholipase C OS=Mus musculus GN=Plcb4 PE=1 SV=1	Q91UZ1	1.145	0.940541
Putative RNA-binding protein Luc7-like 2 OS=Mus musculus GN=Luc7l2 PE=1 SV=1	E9Q715	0.923	0.816129
ADP-ribosylation factor-like protein 1 OS=Mus musculus GN=Arl1 PE=1 SV=1	P61211	0.853	0.491896
Translation initiation factor eIF-2B subunit beta OS=Mus musculus GN=Eif2b2 PE=1 SV=1	Q99LD9	0.909	0.778694
Microtubule-associated protein 4 OS=Mus musculus GN=Map4 PE=1 SV=3	P27546	0.898	0.78716
Synapsin-2 OS=Mus musculus GN=Syn2 PE=1 SV=2	Q64332	1.006	0.990877
Melanoma inhibitory activity protein 3 OS=Mus musculus GN=Mia3 PE=1 SV=2	Q8BI84	1.284	0.548537
Y-box-binding protein 3 OS=Mus musculus GN=Ybx3 PE=1 SV=2	Q9JKB3	1.046	0.997319
V-type proton ATPase subunit F OS=Mus musculus GN=Atp6v1f PE=1 SV=2	Q9D1K2	1.144	0.469741
Interferon-induced protein with tetratricopeptide repeats 3B OS=Mus musculus GN=Ifit3b PE=1 SV=1	E9PV48	0.828	0.263633
Caspase-8 OS=Mus musculus GN=Casp8 PE=1 SV=1	O89110	0.614	1.28235e-05
Serine/threonine-protein kinase Sgk1 OS=Mus musculus GN=Sgk1 PE=1 SV=1	E9Q8C1	0.768	0.166626
MAP kinase-activating death domain protein OS=Mus musculus GN=Madd PE=1 SV=1	A0A0R4J1F4	0.979	0.964418
Protein farnesyltransferase/geranylgeranyltransferase type-1 subunit alpha OS=Mus musculus GN=Fnta PE=1 SV=1	Q61239	0.983	0.993171
Molybdopterin synthase sulfur carrier subunit OS=Mus musculus GN=Mocs2 PE=1 SV=1	F6ZGI7	1.11	0.962644
Glycogen phosphorylase, liver form OS=Mus musculus GN=Pygl PE=1 SV=4	Q9ET01	1.185	0.773854
Far upstream element (FUSE)-binding protein 3 OS=Mus musculus GN=Fubp3 PE=1 SV=1	A2AJ72	1.198	0.696682
Arf-GAP domain and FG repeat-containing protein 1 OS=Mus musculus GN=Agfg1 PE=1 SV=1	A0A087WNV1	0.897	0.737359
Triokinase/FMN cyclase OS=Mus musculus GN=Tkfc PE=1 SV=1	Q8VC30	1.051	0.993171
Nectin-1 OS=Mus musculus GN=Nectin1 PE=1 SV=3	Q9JKF6	1.052	0.971469
CD151 antigen OS=Mus musculus GN=Cd151 PE=1 SV=2	O35566	0.847	0.475522
Purine nucleoside phosphorylase OS=Mus musculus GN=Pnp PE=1 SV=1	Q543K9	1.007	0.990877
Regulator of chromosome condensation OS=Mus musculus GN=Rcc1 PE=1 SV=1	Q8VE37	1.066	0.982374
Protein arginine N-methyltransferase 3 OS=Mus musculus GN=Prmt3 PE=1 SV=2	Q922H1	0.907	0.818429
Proline synthase co-transcribed bacterial homolog protein OS=Mus musculus GN=Prosc PE=1 SV=1	Q9Z2Y8	1.085	0.778694
N-acetylgalactosamine kinase OS=Mus musculus GN=Galk2 PE=1 SV=1	Q8BUU7	1	0.974607
Trafficking protein particle complex subunit 3 OS=Mus musculus GN=Trappc3 PE=1 SV=1	O55013	1.004	0.993171
1-phosphatidylinositol 4,5-bisphosphate phosphodiesterase beta-1 OS=Mus musculus GN=Plcb1 PE=1 SV=2	Q9Z1B3	0.957	0.942263
26S proteasome non-ATPase regulatory subunit 11 OS=Mus musculus GN=Psmd11 PE=1 SV=3	Q8BG32	0.961	0.975885
Neuroligin-3 OS=Mus musculus GN=Nlgn3 PE=1 SV=1	A2AGI2	1.155	0.738768
[3-methyl-2-oxobutanoate dehydrogenase [lipoamide]] kinase, mitochondrial OS=Mus musculus GN=Bckdk PE=1 SV=1	A0A0U1RNL7	1.047	0.998835
Dynein, axonemal, heavy chain 7A OS=Mus musculus GN=Dnah7a PE=1 SV=2	E9Q0T8	0.846	0.596603
Inverted formin-2 OS=Mus musculus GN=Inf2 PE=1 SV=1	Q0GNC1	0.854	0.571878
U6 snRNA-associated Sm-like protein LSm2 OS=Mus musculus GN=Lsm2 PE=1 SV=1	O35900	0.951	0.891428
Rho GDP-dissociation inhibitor 2 OS=Mus musculus GN=Arhgdib PE=1 SV=3	Q61599	1.005	0.993171
Cathepsin B OS=Mus musculus GN=Ctsb PE=1 SV=2	P10605	1.031	0.955943
Clathrin interactor 1 OS=Mus musculus GN=Clint1 PE=1 SV=1	Q5SUH7	0.835	0.483251
Putative uncharacterized protein OS=Mus musculus GN=Tle2 PE=2 SV=1	Q3UN01	1.214	0.777793
Polyadenylate-binding protein 1 OS=Mus musculus GN=Pabpc1 PE=1 SV=2	P29341	1.053	0.888103
Alpha-galactosidase A OS=Mus musculus GN=Gla PE=1 SV=1	P51569	1.138	0.927878
Reticulon 4 interacting protein 1 OS=Mus musculus GN=Rtn4ip1 PE=1 SV=1	A0A0R4J0S3	1.33	0.25775
Microtubule-associated protein 2 (Fragment) OS=Mus musculus GN=Map2 PE=1 SV=1	G3UZE9	0.744	0.119161
Kininogen-1 OS=Mus musculus GN=Kng1 PE=1 SV=1	O08677	1.501	1.33796e-05
Beclin-1 (Fragment) OS=Mus musculus GN=Becn1 PE=1 SV=1	F7C090	1.111	0.924715
Tumor protein D53 OS=Mus musculus GN=Tpd52l1 PE=1 SV=1	O54818	1.339	0.770804
MCG14259, isoform CRA_b OS=Mus musculus GN=U2af1 PE=1 SV=1	G3UW94	0.978	0.964418
Tyrosine-protein phosphatase non-receptor type 6 OS=Mus musculus GN=Ptpn6 PE=1 SV=2	P29351	1.134	0.850653
Serine/threonine-protein kinase mTOR OS=Mus musculus GN=Mtor PE=1 SV=2	Q9JLN9	1.005	0.998835
Ras-related protein R-Ras OS=Mus musculus GN=Rras PE=1 SV=1	P10833	0.942	0.896258
Basigin OS=Mus musculus GN=Bsg PE=1 SV=1	K3W4Q8	0.872	0.55696
Heat shock protein HSP 90-alpha OS=Mus musculus GN=Hsp90aa1 PE=1 SV=4	P07901	0.905	0.819259
Extracellular superoxide dismutase [Cu-Zn] OS=Mus musculus GN=Sod3 PE=1 SV=1	O09164
Uncharacterized protein OS=Mus musculus GN=Gm15800 PE=1 SV=2	E9Q2E4	1.087	0.978724
Protein CDV3 OS=Mus musculus GN=Cdv3 PE=1 SV=2	Q4VAA2	0.913	0.802779
Endoplasmic reticulum-Golgi intermediate compartment protein 3 (Fragment) OS=Mus musculus GN=Ergic3 PE=1 SV=8	F6UIS1	0.735	0.170477
Tectonin beta-propeller repeat-containing protein 1 OS=Mus musculus GN=Tecpr1 PE=1 SV=1	Q80VP0	1.189	0.757253
Calcitonin gene-related peptide 1 OS=Mus musculus GN=Calca PE=2 SV=1	Q99JA0	1.164	0.770804
Protein S100-B OS=Mus musculus GN=S100b PE=1 SV=2	P50114	0.995	0.995649
MCG18019 OS=Mus musculus GN=Vgf PE=1 SV=1	Q0VGU4	1.078	0.8982
Microtubule-actin cross-linking factor 1 (Fragment) OS=Mus musculus GN=Macf1 PE=1 SV=1	F6XCT0	1.253	0.74224
26S protease regulatory subunit 6B OS=Mus musculus GN=Psmc4 PE=1 SV=1	A0A140LIZ5	0.963	0.967578
Cadherin-11 OS=Mus musculus GN=Cdh11 PE=1 SV=1	P55288	1.061	0.998835
SAP domain-containing ribonucleoprotein OS=Mus musculus GN=Sarnp PE=1 SV=3	Q9D1J3	1.028	0.998835
BTB/POZ domain-containing protein KCTD12 OS=Mus musculus GN=Kctd12 PE=1 SV=1	A0A0R4J2B2	1.02	0.990877
NCK-interacting protein with SH3 domain OS=Mus musculus GN=Nckipsd PE=1 SV=2	Q9ESJ4	1.179	0.352484
Polypyrimidine tract-binding protein 2 OS=Mus musculus GN=Ptbp2 PE=1 SV=2	Q91Z31	0.759	0.0584672
Leucine-rich repeat-containing protein 47 OS=Mus musculus GN=Lrrc47 PE=1 SV=1	Q505F5	1.04	0.964142
BTB/POZ domain-containing protein KCTD8 OS=Mus musculus GN=Kctd8 PE=1 SV=1	Q50H33
Thyroid hormone receptor-associated protein 3 OS=Mus musculus GN=Thrap3 PE=1 SV=1	Q569Z6	1.344	0.771493
V-type proton ATPase 16 kDa proteolipid subunit OS=Mus musculus GN=Atp6v0c PE=1 SV=1	P63082	0.867	0.634878
CCR4-NOT transcription complex subunit 7 OS=Mus musculus GN=Cnot7 PE=1 SV=1	Q60809	1.46	0.292611
Seizure 6-like protein 2 OS=Mus musculus GN=Sez6l2 PE=1 SV=1	Q4V9Z5	1.142	0.696315
N(G),N(G)-dimethylarginine dimethylaminohydrolase 2 OS=Mus musculus GN=Ddah2 PE=1 SV=1	Q99LD8	1.093	0.759148
PEX5-related protein OS=Mus musculus GN=Pex5l PE=1 SV=1	D3YYH0	0.918	0.848484
Transforming protein RhoA OS=Mus musculus GN=Rhoa PE=1 SV=1	Q9QUI0	0.933	0.895214
Protein S100-A4 (Fragment) OS=Mus musculus GN=S100a4 PE=1 SV=1	A0A0G2JGD2	0.888	0.6661
Testican-2 OS=Mus musculus GN=Spock2 PE=1 SV=1	Q9ER58	1.032	0.998835
Ganglioside-induced differentiation-associated protein 1 OS=Mus musculus GN=Gdap1 PE=1 SV=1	O88741	1.175	0.593198
Poly(rC)-binding protein 2 OS=Mus musculus GN=Pcbp2 PE=1 SV=1	Q61990	1.003	0.993171
Regulator of G-protein-signaling 6 OS=Mus musculus GN=Rgs6 PE=1 SV=2	A0A087WQG6	1.059	0.920674
Abl interactor 1 OS=Mus musculus GN=Abi1 PE=1 SV=3	Q8CBW3	1.019	0.990877
Hepatocyte growth factor-regulated tyrosine kinase substrate OS=Mus musculus GN=Hgs PE=1 SV=2	Q99LI8	0.898	0.761182
Amyloid beta A4 precursor protein-binding family A member 1 OS=Mus musculus GN=Apba1 PE=1 SV=2	B2RUJ5	1.207	0.690594
Geranylgeranyl transferase type-2 subunit beta (Fragment) OS=Mus musculus GN=Rabggtb PE=1 SV=1	A0A0G2JDK3	0.924	0.860744
Protein IMPACT OS=Mus musculus GN=Impact PE=1 SV=2	O55091	1.051	0.943102
SH3 domain-binding protein 1 OS=Mus musculus GN=Sh3bp1 PE=1 SV=1	A2A5V2	1.085	0.979275
Radixin OS=Mus musculus GN=Rdx PE=1 SV=3	P26043	0.987	0.998835
Lupus La protein homolog OS=Mus musculus GN=Ssb PE=1 SV=1	P32067	1.074	0.908616
Mitogen-activated protein kinase kinase kinase 20 (Fragment) OS=Mus musculus GN=Map3k20 PE=1 SV=8	A2ASW6	1.356	0.656639
Dimethylaniline monooxygenase [N-oxide-forming] 5 OS=Mus musculus GN=Fmo5 PE=1 SV=4	P97872	1.066	0.993171
Microtubule-associated protein OS=Mus musculus GN=Mapt PE=1 SV=1	A0A0A0MQC7	2.545	1.28458e-07
Heterogeneous nuclear ribonucleoproteins A2/B1 OS=Mus musculus GN=Hnrnpa2b1 PE=1 SV=2	O88569	1.134	0.570265
Guanine nucleotide-binding protein G(s) subunit alpha isoforms short OS=Mus musculus GN=Gnas PE=1 SV=1	P63094	0.9	0.737359
Developmentally-regulated GTP-binding protein 2 OS=Mus musculus GN=Drg2 PE=1 SV=1	Q9QXB9	1.006	0.994448
Poly(rC)-binding protein 4 OS=Mus musculus GN=Pcbp4 PE=1 SV=1	P57724	1.102	0.935952
Tether-containing UBX domain for GLUT4 (Fragment) OS=Mus musculus GN=Aspscr1 PE=1 SV=8	A2ABZ8	1.094	0.962644
Sorbin and SH3 domain-containing protein 2 OS=Mus musculus GN=Sorbs2 PE=1 SV=2	Q3UTJ2	0.909	0.777793
Rho GTPase-activating protein 26 OS=Mus musculus GN=Arhgap26 PE=1 SV=1	E9QAQ3	1.196	0.888103
Nuclear receptor coactivator 7 OS=Mus musculus GN=Ncoa7 PE=1 SV=1	A0A1L1SSS4	1.157	0.895214
Prolargin OS=Mus musculus GN=Prelp PE=1 SV=2	Q9JK53	1.494	0.312528
ADP-dependent glucokinase OS=Mus musculus GN=Adpgk PE=1 SV=1	A0A1L1SSF2	1.195	0.821274
Breast carcinoma-amplified sequence 1 homolog OS=Mus musculus GN=Bcas1 PE=1 SV=3	Q80YN3	0.858	0.565255
Vesicle-associated membrane protein 2 OS=Mus musculus GN=Vamp2 PE=1 SV=1	B0QZN5	0.999	0.998835
Integrin beta OS=Mus musculus GN=Itgb2 PE=1 SV=1	Q542I8	0.935	0.892117
Rab GTPase-activating protein 1-like OS=Mus musculus GN=Rabgap1l PE=1 SV=1	A6H6A9
Golgi phosphoprotein 3 OS=Mus musculus GN=Golph3 PE=1 SV=1	Q9CRA5	0.992	0.962644
Guanylate binding protein 8 OS=Mus musculus GN=Gbp8 PE=1 SV=1	Q2V6D6
Melanoma inhibitory activity protein 2 OS=Mus musculus GN=Mia2 PE=1 SV=1	H3BK48	1.058	0.993171
Ral GTPase-activating protein subunit beta OS=Mus musculus GN=Ralgapb PE=1 SV=1	E9Q0J2	1.06	0.986163
Leucine-rich HEV glycoprotein OS=Mus musculus GN=Lrg1 PE=1 SV=1	Q91XL1	1.729	0.00625811
MLN64 N-terminal domain homolog OS=Mus musculus GN=Stard3nl PE=1 SV=2	Q9DCI3	0.839	0.628998
Type I inositol 3,4-bisphosphate 4-phosphatase OS=Mus musculus GN=Inpp4a PE=1 SV=1	D3YUL8	1.079	0.927878
Neurexin II OS=Mus musculus GN=Nrxn2 PE=1 SV=1	E9Q7X7	1.223	0.884382
Microtubule-associated protein (Fragment) OS=Mus musculus GN=Map4 PE=1 SV=1	A0A0G2JFH2	1.202	0.738768
Sodium-coupled neutral amino acid transporter 1 OS=Mus musculus GN=Slc38a1 PE=1 SV=1	Q8K2P7	0.979	0.964418
Vacuolar protein sorting-associated protein 13A OS=Mus musculus GN=Vps13a PE=1 SV=1	Q5H8C4	1.057	0.985725
Autophagy-related protein 16-1 OS=Mus musculus GN=Atg16l1 PE=1 SV=1	Q8C0J2	0.918	0.850295
Neurotrimin OS=Mus musculus GN=Ntm PE=1 SV=1	D3Z396
COP9 signalosome complex subunit 2 OS=Mus musculus GN=Cops2 PE=1 SV=1	P61202	0.948	0.962143
WD repeat and FYVE domain-containing protein 3 OS=Mus musculus GN=Wdfy3 PE=1 SV=1	A0A1D5RLV7	1.068	0.964418
Solute carrier family 25 member 51 OS=Mus musculus GN=Slc25a51 PE=1 SV=1	Q5HZI9	1.396	0.181306
Ras-related protein Rab-38 OS=Mus musculus GN=Rab38 PE=1 SV=1	A0A140LHK2	1.204	0.696315
Limbic system-associated membrane protein OS=Mus musculus GN=Lsamp PE=1 SV=1	Q3TYE5	1.045	0.993171
Lambda-crystallin homolog OS=Mus musculus GN=Cryl1 PE=1 SV=3	Q99KP3	0.944	0.897698
Alpha-enolase OS=Mus musculus GN=Eno1 PE=1 SV=3	P17182	0.887	0.737237
Agrin OS=Mus musculus GN=Agrn PE=1 SV=1	A2ASQ1	0.92	0.860744
Kynurenine--oxoglutarate transaminase 3 OS=Mus musculus GN=Kyat3 PE=1 SV=1	Q71RI9	1.108	0.703259
Rab3 GTPase-activating protein non-catalytic subunit OS=Mus musculus GN=Rab3gap2 PE=1 SV=1	A0A0A6YWM5	1.154	0.45712
RIKEN cDNA 9030624J02 gene OS=Mus musculus GN=9030624J02Rik PE=1 SV=1	I1E4X5	1.252	0.598877
NmrA-like family domain-containing protein 1 OS=Mus musculus GN=Nmral1 PE=1 SV=1	D3YU12	0.946	0.956802
2-amino-3-ketobutyrate coenzyme A ligase, mitochondrial OS=Mus musculus GN=Gcat PE=1 SV=2	O88986	1.199	0.656031
Rho guanine nucleotide exchange factor 2 OS=Mus musculus GN=Arhgef2 PE=1 SV=1	H3BJU7	0.955	0.906717
Signal recognition particle 9 kDa protein OS=Mus musculus GN=Srp9 PE=1 SV=2	P49962	1.144	0.90853
Putative uncharacterized protein OS=Mus musculus GN=Sfxn3 PE=1 SV=1	Q3U4F0	0.972	0.956508
Huntingtin OS=Mus musculus GN=Htt PE=1 SV=1	G3X9H5	1.006	0.998835
Tetraspanin-15 OS=Mus musculus GN=Tspan15 PE=1 SV=2	F7BWT7	0.959	0.940541
Alpha-ketoglutarate-dependent dioxygenase FTO (Fragment) OS=Mus musculus GN=Fto PE=1 SV=8	D3Z127	1.3	0.605751
Niemann-Pick C1 protein OS=Mus musculus GN=Npc1 PE=1 SV=2	O35604	0.878	0.688367
Rab GTPase-activating protein 1 OS=Mus musculus GN=Rabgap1 PE=1 SV=1	A2AWA9	0.856	0.558642
Leucine-rich repeat-containing protein 4B OS=Mus musculus GN=Lrrc4b PE=1 SV=1	P0C192	0.86	0.634891
Serine/threonine-protein kinase DCLK1 OS=Mus musculus GN=Dclk1 PE=1 SV=1	Q9JLM8	0.93	0.888103
Nuclear pore complex protein Nup155 OS=Mus musculus GN=Nup155 PE=1 SV=1	Q99P88	1.279	0.627794
GrpE protein homolog 1, mitochondrial OS=Mus musculus GN=Grpel1 PE=1 SV=1	Q99LP6	0.988	0.998835
ADP-ribosylation factor 4 OS=Mus musculus GN=Arf4 PE=1 SV=2	P61750	0.779	0.1147
Regulator of G-protein signaling 10 OS=Mus musculus GN=Rgs10 PE=1 SV=1	Q9CQE5	1.016	0.998835
Acyl-protein thioesterase 1 OS=Mus musculus GN=Lypla1 PE=1 SV=1	J3QP56	0.948	0.938786
PC4 and SFRS1-interacting protein OS=Mus musculus GN=Psip1 PE=1 SV=1	Q99JF8	0.814	0.241281
Fibrinogen gamma chain OS=Mus musculus GN=Fgg PE=1 SV=1	Q8VCM7	1.19	0.306957
Receptor-type tyrosine-protein phosphatase eta OS=Mus musculus GN=Ptprj PE=1 SV=2	E9Q4S7	1.108	0.962644
Katanin p80 WD40 repeat-containing subunit B1 OS=Mus musculus GN=Katnb1 PE=1 SV=1	A0A1D5RMH5	1.046	0.996945
Alpha-2-antiplasmin OS=Mus musculus GN=Serpinf2 PE=1 SV=1	Q61247	1.258	0.55721
Cell cycle control protein 50A OS=Mus musculus GN=Tmem30a PE=1 SV=1	Q8VEK0	0.818	0.353009
Immunoglobulin kappa variable 3-4 (Fragment) OS=Mus musculus GN=Igkv3-4 PE=4 SV=2	A0A140T8Q4	1.788	0.0911366
WAS/WASL-interacting protein family member 2 (Fragment) OS=Mus musculus GN=Wipf2 PE=1 SV=1	D3Z0K7	0.996	0.990877
Cell adhesion molecule 1 OS=Mus musculus GN=Cadm1 PE=1 SV=2	Q8R5M8	1.008	0.994525
Small ubiquitin-related modifier 1 OS=Mus musculus GN=Sumo1 PE=1 SV=1	P63166	1.223	0.649525
Protein FAM131B OS=Mus musculus GN=Fam131b PE=1 SV=1	Q3TY60	1.03	0.993171
Complement C1q tumor necrosis factor-related protein 5 (Fragment) OS=Mus musculus GN=C1qtnf5 PE=1 SV=2	A0A0U1RNV1	1.103	0.964302
1-acyl-sn-glycerol-3-phosphate acyltransferase alpha OS=Mus musculus GN=Agpat1 PE=1 SV=1	O35083	1.099	0.850106
C2 domain-containing protein 2 OS=Mus musculus GN=C2cd2 PE=2 SV=1	E9Q3C1	1.125	0.964418
Valine--tRNA ligase, mitochondrial OS=Mus musculus GN=Vars2 PE=1 SV=2	Q3U2A8	1.414	0.277899
Peptidyl-prolyl cis-trans isomerase B OS=Mus musculus GN=Ppib PE=1 SV=2	P24369	0.983	0.995649
Uncharacterized protein KIAA1107 OS=Mus musculus GN=Kiaa1107 PE=1 SV=5	Q80TK0	0.856	0.672957
S-adenosylmethionine synthase isoform type-2 OS=Mus musculus GN=Mat2a PE=1 SV=2	Q3THS6	0.993	0.998029
Citron Rho-interacting kinase OS=Mus musculus GN=Cit PE=1 SV=3	P49025	1.482	0.547985
SLIT-ROBO Rho GTPase-activating protein 3 OS=Mus musculus GN=Srgap3 PE=1 SV=1	E9QN14	0.913	0.802779
Metallo-beta-lactamase domain-containing protein 2 OS=Mus musculus GN=Mblac2 PE=1 SV=2	Q8BL86	1.132	0.835774
Protein tweety homolog 3 OS=Mus musculus GN=Ttyh3 PE=1 SV=1	Q6P5F7	0.933	0.891337
Phosphoglycerate kinase 1 OS=Mus musculus GN=Pgk1 PE=1 SV=4	P09411	0.906	0.821274
PDZ and LIM domain protein 2 OS=Mus musculus GN=Pdlim2 PE=1 SV=1	Q8R1G6	1.205	0.771493
Thiosulfate sulfurtransferase OS=Mus musculus GN=Tst PE=1 SV=3	P52196	1.073	0.824989
Glycogen synthase kinase-3 alpha OS=Mus musculus GN=Gsk3a PE=1 SV=2	Q2NL51	1.007	0.993171
Pre-mRNA-processing factor 19 OS=Mus musculus GN=Prpf19 PE=1 SV=1	Q99KP6	1.017	0.998835
2-(3-amino-3-carboxypropyl)histidine synthase subunit 2 OS=Mus musculus GN=Dph2 PE=1 SV=1	Q9CR25
Cellular retinoic acid-binding protein 1 OS=Mus musculus GN=Crabp1 PE=1 SV=2	P62965	1.032	0.998835
RIKEN cDNA 2210013O21 gene OS=Mus musculus GN=2210013O21Rik PE=4 SV=1	A0A0N4SUI7
Expressed sequence AI837181 OS=Mus musculus GN=AI837181 PE=1 SV=1	E9QNR6	1.124	0.675119
Ectonucleotide pyrophosphatase/phosphodiesterase 7 OS=Mus musculus GN=Enpp7 PE=1 SV=1	A2A5N7
Kinesin-like protein KIF1A OS=Mus musculus GN=Kif1a PE=1 SV=1	Q6TA13	1.063	0.84284
Transporter OS=Mus musculus GN=Slc6a5 PE=1 SV=1	B2RQX9	0.84	0.458796
UDP-N-acetylhexosamine pyrophosphorylase-like protein 1 OS=Mus musculus GN=Uap1l1 PE=1 SV=1	Q3TW96	1.07	0.856751
Serine/threonine-protein kinase B-raf OS=Mus musculus GN=Braf PE=1 SV=3	P28028	0.931	0.850731
Heme-binding protein 1 OS=Mus musculus GN=Hebp1 PE=1 SV=2	Q9R257	1.186	0.29869
Tubulin-specific chaperone E OS=Mus musculus GN=Tbce PE=1 SV=1	Q8CIV8	1.176	0.759148
Acylamino-acid-releasing enzyme (Fragment) OS=Mus musculus GN=Apeh PE=1 SV=1	A0A0R4J107	0.958	0.964418
Myelin-associated glycoprotein OS=Mus musculus GN=Mag PE=1 SV=2	P20917	0.987	0.99918
E3 ubiquitin-protein ligase synoviolin OS=Mus musculus GN=Syvn1 PE=1 SV=1	D3Z1Y1	1.17	0.875018
Protocadherin gamma B2 OS=Mus musculus GN=Pcdhgb2 PE=1 SV=1	Q91XX7	1.032	0.998835
Small nuclear ribonucleoprotein E OS=Mus musculus GN=Snrpe PE=1 SV=1	E9Q4F4	1.303	0.407093
Ankyrin-3 OS=Mus musculus GN=Ank3 PE=1 SV=1	G5E8K5	1.04	0.990877
Creatine kinase M-type OS=Mus musculus GN=Ckm PE=1 SV=1	P07310	1.059	0.882401
Cytosolic purine 5'-nucleotidase OS=Mus musculus GN=Nt5c2 PE=1 SV=1	E9Q9M1	1.022	0.994525
Putative uncharacterized protein OS=Mus musculus GN=Rab31 PE=1 SV=1	Q3TXV4	1.03	0.998835
Spondin-1 OS=Mus musculus GN=Spon1 PE=1 SV=1	Q8VCC9	1.1	0.964418
Peptidyl-prolyl cis-trans isomerase-like 3 OS=Mus musculus GN=Ppil3 PE=1 SV=1	Q9D6L8	0.931	0.878743
MMS19 nucleotide excision repair protein homolog OS=Mus musculus GN=Mms19 PE=1 SV=1	Q9D071	0.986	0.962644
Solute carrier family 22 member 17 OS=Mus musculus GN=Slc22a17 PE=2 SV=2	Q9D9E0	1.152	0.828472
Dihydropyrimidinase-related protein 3 OS=Mus musculus GN=Dpysl3 PE=1 SV=1	E9PWE8	1.029	0.956802
Migration and invasion enhancer 1 OS=Mus musculus GN=Mien1 PE=1 SV=1	Q9CQ86	0.923	0.856943
Argininosuccinate lyase OS=Mus musculus GN=Asl PE=1 SV=1	Q91YI0	0.99	0.998835
Alpha-aminoadipic semialdehyde synthase, mitochondrial OS=Mus musculus GN=Aass PE=1 SV=1	Q99K67	1.028	0.993171
Transmembrane protein with metallophosphoesterase domain OS=Mus musculus GN=Tmppe PE=1 SV=2	D3Z286	1.185	0.931015
Serine-threonine kinase receptor-associated protein OS=Mus musculus GN=Strap PE=1 SV=2	Q9Z1Z2	0.952	0.956802
Protein disulfide-isomerase TMX3 OS=Mus musculus GN=Tmx3 PE=1 SV=2	Q8BXZ1	1.042	0.938786
MCG14171, isoform CRA_b OS=Mus musculus GN=Map1lc3b PE=1 SV=1	M0QWC2	1.104	0.888103
Cytosolic endo-beta-N-acetylglucosaminidase (Fragment) OS=Mus musculus GN=Engase PE=1 SV=1	F7CXI4	1.112	0.962644
TSC22 domain family protein 3 OS=Mus musculus GN=Tsc22d3 PE=1 SV=1	B1AVF2	0.798	0.249232
Armadillo repeat-containing protein 8 OS=Mus musculus GN=Armc8 PE=1 SV=2	Q9DBR3
TSC22 domain family protein 4 (Fragment) OS=Mus musculus GN=Tsc22d4 PE=1 SV=1	F6VXN4	1.199	0.8982
Fructosamine-3-kinase OS=Mus musculus GN=Fn3k PE=1 SV=1	Q9ER35	0.913	0.825876
Synaptophysin-like protein 2 OS=Mus musculus GN=Sypl2 PE=1 SV=1	O89104	1.035	0.998835
Neurofilament light polypeptide OS=Mus musculus GN=Nefl PE=1 SV=5	P08551	0.628	7.94387e-06
Ubiquitin carboxyl-terminal hydrolase 24 OS=Mus musculus GN=Usp24 PE=1 SV=1	E9PV45	0.947	0.90853
Annexin A5 OS=Mus musculus GN=Anxa5 PE=1 SV=1	P48036	1.042	0.925898
Guanylate kinase OS=Mus musculus GN=Guk1 PE=1 SV=2	Q64520	1.112	0.861588
Ataxin-10 OS=Mus musculus GN=Atxn10 PE=1 SV=2	P28658	0.944	0.913075
Sec1 family domain-containing protein 1 OS=Mus musculus GN=Scfd1 PE=1 SV=1	Q8BRF7	0.85	0.501667
SNF-related serine/threonine-protein kinase (Fragment) OS=Mus musculus GN=Snrk PE=1 SV=1	D3Z1F6	0.982	0.959092
LIM domain-containing protein 2 OS=Mus musculus GN=Limd2 PE=1 SV=1	Q8BGB5	1.051	0.998835
Arpin OS=Mus musculus GN=Arpin PE=1 SV=1	Q9D0A3	1.017	0.990877
8-oxo-dGDP phosphatase NUDT18 OS=Mus musculus GN=Nudt18 PE=1 SV=1	Q3U2V3	1.374	0.400109
Ppfia1 protein OS=Mus musculus GN=Ppfia1 PE=1 SV=1	B2RXQ2	1.068	0.986163
COP9 signalosome complex subunit 3 OS=Mus musculus GN=Cops3 PE=1 SV=3	O88543	0.945	0.931015
Desumoylating isopeptidase 1 OS=Mus musculus GN=Desi1 PE=4 SV=1	E9Q2Y9	1.163	0.813609
Gamma-tubulin complex component (Fragment) OS=Mus musculus GN=Tubgcp2 PE=1 SV=1	A0A1B0GR08	1.465	0.521951
Guanylate cyclase soluble subunit beta-1 OS=Mus musculus GN=Gucy1b3 PE=1 SV=1	O54865	1.28	0.397951
Raftlin-2 OS=Mus musculus GN=Rftn2 PE=1 SV=3	Q8CHX7	0.974	0.962644
Seipin OS=Mus musculus GN=Bscl2 PE=1 SV=1	E0CXJ2	1.176	0.828472
Ig gamma-1 chain C region, membrane-bound form OS=Mus musculus GN=Ighg1 PE=1 SV=2	P01869	0.983	0.962644
Protein transport protein Sec31A OS=Mus musculus GN=Sec31a PE=1 SV=2	Q3UPL0	0.935	0.905053
Ubiquitin-conjugating enzyme E2 D1 OS=Mus musculus GN=Ube2d1 PE=2 SV=1	P61080	0.932	0.891075
ES1 protein homolog, mitochondrial OS=Mus musculus GN=D10Jhu81e PE=1 SV=1	Q9D172	1.049	0.906489
Acyl-coenzyme A thioesterase 11 OS=Mus musculus GN=Acot11 PE=1 SV=1	A2AVR6	1.004	0.990877
RIKEN cDNA 1110004F10 gene (Fragment) OS=Mus musculus GN=1110004F10Rik PE=1 SV=1	A0A0U1RPI0	1.069	0.964418
Rhophilin-2 OS=Mus musculus GN=Rhpn2 PE=1 SV=2	Q8BWR8	1.208	0.696315
Docking protein 1 OS=Mus musculus GN=Dok1 PE=1 SV=2	P97465	1.083	0.962697
Leucyl-cystinyl aminopeptidase OS=Mus musculus GN=Lnpep PE=1 SV=1	Q8C129	1.192	0.27084
Alpha-1-antitrypsin 1-1 OS=Mus musculus GN=Serpina1a PE=1 SV=4	P07758	1.285	0.0513874
SPRY domain-containing protein 7 OS=Mus musculus GN=Spryd7 PE=1 SV=2	Q3TFQ1	0.976	0.956508
Calcineurin B homologous protein 3 OS=Mus musculus GN=Tesc PE=1 SV=2	Q9JKL5	1.416	0.548537
SH2B adapter protein 1 OS=Mus musculus GN=Sh2b1 PE=1 SV=2	Q91ZM2	1.111	0.959092
Protein transport protein Sec23A OS=Mus musculus GN=Sec23a PE=1 SV=1	E9Q1S3	1.15	0.508996
Tryptophan 5-hydroxylase 2 OS=Mus musculus GN=Tph2 PE=1 SV=2	Q8CGV2	1.304	0.773854
WD repeat-containing protein 26 OS=Mus musculus GN=Wdr26 PE=1 SV=1	E0CYH4	1.087	0.956508
CAP-Gly domain-containing linker protein 1 OS=Mus musculus GN=Clip1 PE=1 SV=1	Q922J3	0.984	0.96987
ADP-ribosylation factor 3 OS=Mus musculus GN=Arf3 PE=2 SV=2	P61205	0.937	0.932234
Lymphocyte-specific protein 1 OS=Mus musculus GN=Lsp1 PE=1 SV=1	A2A6J7	1.013	0.995649
U2 small nuclear ribonucleoprotein A' OS=Mus musculus GN=Snrpa1 PE=1 SV=2	P57784	1.246	0.690594
Sushi domain-containing protein 2 OS=Mus musculus GN=Susd2 PE=1 SV=1	Q9DBX3	1.053	0.906717
Protein phosphatase 1E OS=Mus musculus GN=Ppm1e PE=1 SV=2	Q80TL0	1.017	0.998835
Nuclear pore complex-associated intranuclear coiled-coil protein TPR OS=Mus musculus GN=Tpr PE=1 SV=1	Q7M739	1.004	0.990877
Microtubule-actin cross-linking factor 1 OS=Mus musculus GN=Macf1 PE=1 SV=1	B1ARU4	1.032	0.947587
2-(3-amino-3-carboxypropyl)histidine synthase subunit 1 OS=Mus musculus GN=Dph1 PE=1 SV=1	Q5NCQ5	0.998	0.971469
D-3-phosphoglycerate dehydrogenase OS=Mus musculus GN=Phgdh PE=1 SV=3	Q61753	0.97	0.990877
Histone deacetylase 6 OS=Mus musculus GN=Hdac6 PE=1 SV=3	Q9Z2V5	1.175	0.782175
Tapasin (Fragment) OS=Mus musculus GN=Tapbp PE=1 SV=1	G3UZZ2	1.016	0.993171
Alpha-methylacyl-CoA racemase OS=Mus musculus GN=Amacr PE=1 SV=4	O09174	1.084	0.964418
Uncharacterized protein OS=Mus musculus GN=Gm9242 PE=4 SV=1	J3QNY1	0.967	0.964418
Actin-binding LIM protein 2 OS=Mus musculus GN=Ablim2 PE=1 SV=1	E9Q4K0	1.336	0.634878
DNA excision repair protein ERCC-6-like 2 (Fragment) OS=Mus musculus GN=Ercc6l2 PE=4 SV=1	F7BXZ2	1.175	0.889861
Fibronectin OS=Mus musculus GN=Fn1 PE=1 SV=1	A0A087WS56	1.297	0.787111
Transgelin OS=Mus musculus GN=Tagln PE=1 SV=3	P37804	0.92	0.846664
2-methoxy-6-polyprenyl-1,4-benzoquinol methylase, mitochondrial OS=Mus musculus GN=Coq5 PE=1 SV=2	Q9CXI0	1.074	0.972383
Peptidyl-prolyl cis-trans isomerase FKBP8 OS=Mus musculus GN=Fkbp8 PE=1 SV=2	O35465	1.036	0.964418
Vacuolar protein sorting-associated protein 29 OS=Mus musculus GN=Vps29 PE=1 SV=1	Q9QZ88	0.991	0.99918
RNA-binding protein FUS (Fragment) OS=Mus musculus GN=Fus PE=1 SV=1	G3UXT7	0.814	0.162954
Uridine 5'-monophosphate synthase OS=Mus musculus GN=Umps PE=1 SV=3	P13439	1.101	0.94094
Very-long-chain (3R)-3-hydroxyacyl-CoA dehydratase 2 OS=Mus musculus GN=Hacd2 PE=1 SV=1	Q9D3B1	0.926	0.878743
Hyaluronan and proteoglycan link protein 3 OS=Mus musculus GN=Hapln3 PE=2 SV=3	Q80WM5	1.005	0.98436
Peroxisomal membrane protein 11B OS=Mus musculus GN=Pex11b PE=1 SV=1	Q9Z210	1.033	0.994448
Methylosome subunit pICln OS=Mus musculus GN=Clns1a PE=1 SV=1	Q61189
Misshapen-like kinase 1 (Fragment) OS=Mus musculus GN=Mink1 PE=1 SV=1	F7AMS7	0.937	0.896258
Thymidylate kinase OS=Mus musculus GN=Dtymk PE=1 SV=2	P97930	0.952	0.906489
Putative uncharacterized protein OS=Mus musculus GN=Tmsb15a PE=2 SV=1	Q9D2R9	0.663	2.9548e-05
Sorting nexin-13 OS=Mus musculus GN=Snx13 PE=1 SV=2	E9QNG6	1.033	0.998835
N-alpha-acetyltransferase 15, NatA auxiliary subunit OS=Mus musculus GN=Naa15 PE=1 SV=1	A0A0A6YW80	0.959	0.956508
Tubulin alpha-8 chain OS=Mus musculus GN=Tuba8 PE=1 SV=1	Q9JJZ2	1.212	0.82548
BH3-interacting domain death agonist OS=Mus musculus GN=Bid PE=1 SV=2	P70444	1.163	0.883372
Hepatocyte cell adhesion molecule OS=Mus musculus GN=Hepacam PE=1 SV=2	Q640R3	0.906	0.821274
Potassium voltage-gated channel subfamily A member 3 OS=Mus musculus GN=Kcna3 PE=1 SV=3	P16390	1.032	0.998835
Na(+)/H(+) exchange regulatory cofactor NHE-RF2 OS=Mus musculus GN=Slc9a3r2 PE=1 SV=2	Q9JHL1	0.904	0.800002
MCG14605, isoform CRA_c OS=Mus musculus GN=Trp53rkb PE=1 SV=1	Q543M9	1.295	0.724319
Peptidyl-prolyl cis-trans isomerase FKBP3 OS=Mus musculus GN=Fkbp3 PE=1 SV=2	Q62446	1.018	0.990877
2-hydroxyacylsphingosine 1-beta-galactosyltransferase OS=Mus musculus GN=Ugt8 PE=1 SV=2	Q64676	0.911	0.805658
B-cell receptor-associated protein 31 OS=Mus musculus GN=Bcap31 PE=1 SV=4	Q61335	0.738	0.00734588
WD repeat-containing protein 1 OS=Mus musculus GN=Wdr1 PE=1 SV=3	O88342	0.901	0.802779
Protein DEK OS=Mus musculus GN=Dek PE=1 SV=1	Q7TNV0	0.984	0.970796
WASH complex subunit 5 OS=Mus musculus GN=Washc5 PE=1 SV=2	Q8C2E7	0.945	0.896258
Putative uncharacterized protein OS=Mus musculus GN=Rbm3 PE=1 SV=1	Q8BG13	1.441	0.318918
Translationally-controlled tumor protein OS=Mus musculus GN=Tpt1 PE=1 SV=1	P63028	1.055	0.888103
Cytosol aminopeptidase OS=Mus musculus GN=Lap3 PE=1 SV=3	Q9CPY7	1.094	0.754076
Trafficking protein particle complex 1, isoform CRA_a OS=Mus musculus GN=Trappc1 PE=1 SV=1	B1ASW5	1.217	0.666674
Diacylglycerol kinase theta OS=Mus musculus GN=Dgkq PE=1 SV=1	Q6P5E8	1.089	0.971469
Sulfhydryl oxidase 1 OS=Mus musculus GN=Qsox1 PE=1 SV=1	Q8BND5	1.353	0.483251
Protein arginine N-methyltransferase 5 OS=Mus musculus GN=Prmt5 PE=1 SV=1	A0A0R4J049	1.131	0.759148
Immunoglobulin heavy constant gamma 2C OS=Mus musculus GN=Ighg2c PE=1 SV=1	F6TQW2	1.015	0.998835
Elongin-B OS=Mus musculus GN=Elob PE=1 SV=1	P62869	0.967	0.974378
Methionine aminopeptidase 2 OS=Mus musculus GN=Metap2 PE=1 SV=1	O08663	0.925	0.863791
Synaptophysin OS=Mus musculus GN=Syp PE=1 SV=2	Q62277	0.932	0.916312
Versican core protein OS=Mus musculus GN=Vcan PE=1 SV=1	E9PYH0	1.04	0.931015
Tail-anchored protein insertion receptor WRB OS=Mus musculus GN=Wrb PE=1 SV=1	Q8K0D7	1.064	0.993171
SPARC OS=Mus musculus GN=Sparc PE=1 SV=1	A0A1L1SSH9	1.213	0.521991
Rho guanine nucleotide exchange factor 6 OS=Mus musculus GN=Arhgef6 PE=1 SV=1	A2AFJ8	1.225	0.634878
Transporter OS=Mus musculus GN=Slc6a17 PE=1 SV=1	A0A0R4J087	0.86	0.592046
Testis development-related protein OS=Mus musculus GN=Tdrp PE=1 SV=1	Q8C5P7	1.132	0.928202
YrdC domain-containing protein, mitochondrial OS=Mus musculus GN=Yrdc PE=1 SV=1	Q3U5F4	0.932	0.881943
AMP deaminase OS=Mus musculus GN=Ampd2 PE=1 SV=1	A2AE27	0.983	0.997319
Septin-1 OS=Mus musculus GN=Sept1 PE=1 SV=1	D3Z3V3	0.838	0.38103
Far upstream element-binding protein 2 OS=Mus musculus GN=Khsrp PE=1 SV=2	Q3U0V1	1.021	0.964418
Splicing factor, proline- and glutamine-rich OS=Mus musculus GN=Sfpq PE=1 SV=1	Q8VIJ6	0.968	0.990877
Ral GTPase-activating protein subunit alpha-1 OS=Mus musculus GN=Ralgapa1 PE=1 SV=1	Q6GYP7	1.099	0.944379
V-type proton ATPase subunit D OS=Mus musculus GN=Atp6v1d PE=1 SV=1	P57746	0.972	0.993171
Cullin-5 OS=Mus musculus GN=Cul5 PE=1 SV=3	Q9D5V5	1.04	0.964418
Lactoylglutathione lyase OS=Mus musculus GN=Glo1 PE=1 SV=3	Q9CPU0	0.937	0.931487
Multiple PDZ domain protein OS=Mus musculus GN=Mpdz PE=1 SV=2	Q8VBX6	1.012	0.994525
Pleckstrin homology domain-containing family M member 2 OS=Mus musculus GN=Plekhm2 PE=1 SV=1	A2ADE0	0.9	0.738768
Vacuolar ATPase assembly integral membrane protein Vma21 OS=Mus musculus GN=Vma21 PE=1 SV=1	Q78T54	1.102	0.949945
Eukaryotic translation initiation factor 4E (Fragment) OS=Mus musculus GN=Eif4e PE=1 SV=1	A0A0G2JGT5	0.958	0.949078
CTP synthase 2 OS=Mus musculus GN=Ctps2 PE=1 SV=1	P70303	0.949	0.907381
SLIT-ROBO Rho GTPase-activating protein 2 OS=Mus musculus GN=Srgap2 PE=1 SV=2	Q91Z67	1.107	0.879452
N-terminal kinase-like protein OS=Mus musculus GN=Scyl1 PE=1 SV=1	Q9EQC5	0.888	0.793686
Pleckstrin homology domain-containing family D member 1 OS=Mus musculus GN=Plekhd1 PE=1 SV=1	B2RPU2	0.963	0.927103
RNMT-activating mini protein OS=Mus musculus GN=Fam103a1 PE=3 SV=1	Q9CQY2	1.134	0.815184
Coiled-coil domain-containing protein 93 OS=Mus musculus GN=Ccdc93 PE=1 SV=1	Q7TQK5	0.986	0.96987
Ubiquilin-4 OS=Mus musculus GN=Ubqln4 PE=1 SV=1	Q99NB8	1.093	0.967306
MCG20149, isoform CRA_a OS=Mus musculus GN=Mettl7a1 PE=1 SV=1	Q8C6B0	0.867	0.55696
Phosphatidylinositol 4,5-bisphosphate 5-phosphatase A OS=Mus musculus GN=Inpp5j PE=1 SV=1	A0A075B6D7	1.261	0.643543
Cyclin-dependent kinase 14 OS=Mus musculus GN=Cdk14 PE=1 SV=1	E9PVC7	1.106	0.908816
Fatty-acid amide hydrolase 1 OS=Mus musculus GN=Faah PE=1 SV=1	O08914	1.108	0.8982
Glutathione S-transferase Mu 5 OS=Mus musculus GN=Gstm5 PE=1 SV=1	P48774	1.017	0.96987
Ribosomal protein S6 kinase OS=Mus musculus GN=Rps6ka1 PE=1 SV=1	Q505N6	0.982	0.964418
DAZ-associated protein 1 OS=Mus musculus GN=Dazap1 PE=1 SV=2	Q9JII5	1.117	0.895214
28S ribosomal protein S36, mitochondrial OS=Mus musculus GN=Mrps36 PE=1 SV=1	Q9CQX8	1.018	0.993171
Trafficking protein particle complex 8 OS=Mus musculus GN=Trappc8 PE=1 SV=1	E9PWG2	0.997	0.990877
Protein farnesyltransferase subunit beta OS=Mus musculus GN=Fntb PE=1 SV=1	Q8K2I1	0.97	0.949945
Dehydrogenase/reductase SDR family member 1 OS=Mus musculus GN=Dhrs1 PE=1 SV=1	Q99L04	1.035	0.940541
Actin-related protein 2/3 complex subunit 3 OS=Mus musculus GN=Arpc3 PE=1 SV=3	Q9JM76	1.04	0.940082
UPF0587 protein C1orf123 homolog OS=Mus musculus PE=1 SV=1	Q8BHG2	1.019	0.993171
Unconventional myosin-XVIIIa OS=Mus musculus GN=Myo18a PE=1 SV=1	E9Q405	0.916	0.848484
Pyrroline-5-carboxylate reductase 3 OS=Mus musculus GN=Pycrl PE=1 SV=2	Q9DCC4	0.973	0.962644
Cytoplasmic dynein 1 heavy chain 1 OS=Mus musculus GN=Dync1h1 PE=1 SV=2	Q9JHU4	0.963	0.979474
FAD synthase OS=Mus musculus GN=Flad1 PE=1 SV=1	Q8R123	1.028	0.993171
Hypoxanthine-guanine phosphoribosyltransferase OS=Mus musculus GN=Hprt1 PE=1 SV=3	P00493	0.997	0.994525
Pyruvate kinase PKLR (Fragment) OS=Mus musculus GN=Pklr PE=1 SV=1	D3Z2C4	1.147	0.871084
Lysosomal alpha-glucosidase OS=Mus musculus GN=Gaa PE=1 SV=2	P70699	1.1	0.919979
Small nuclear ribonucleoprotein-associated protein B OS=Mus musculus GN=Snrpb PE=1 SV=1	P27048	1.218	0.754076
OTU domain-containing protein 6B OS=Mus musculus GN=Otud6b PE=1 SV=1	Q8K2H2	1.101	0.964418
SUMO-activating enzyme subunit 1 OS=Mus musculus GN=Sae1 PE=1 SV=1	Q9R1T2	0.951	0.924462
Elongation factor 2 OS=Mus musculus GN=Eef2 PE=1 SV=2	P58252	1.013	0.975885
Phosphomannomutase 1 OS=Mus musculus GN=Pmm1 PE=1 SV=1	O35621	1.011	0.994448
Parkinson disease 7 domain-containing protein 1 OS=Mus musculus GN=Pddc1 PE=1 SV=1	Q8BFQ8	1.208	0.510121
Far upstream element-binding protein 1 OS=Mus musculus GN=Fubp1 PE=1 SV=1	A0A0G2JFY5	1.018	0.993171
NAC-alpha domain-containing protein 1 OS=Mus musculus GN=Nacad PE=1 SV=1	Q5SWP3	1.004	0.986163
Importin subunit alpha OS=Mus musculus GN=Kpna6 PE=1 SV=1	Q4FJZ2
Importin-9 OS=Mus musculus GN=Ipo9 PE=1 SV=1	E9QKZ2	1	0.993171
Transmembrane 4 L6 family member 1 OS=Mus musculus GN=Tm4sf1 PE=1 SV=1	Q64302	1.298	0.306533
Palmitoyl-protein thioesterase 1 OS=Mus musculus GN=Ppt1 PE=1 SV=2	O88531	0.948	0.956508
Thioredoxin-related transmembrane protein 2 OS=Mus musculus GN=Tmx2 PE=1 SV=1	Q9D710	0.877	0.593198
UPF0568 protein C14orf166 homolog OS=Mus musculus PE=1 SV=1	Q9CQE8	0.91	0.774225
Putative uncharacterized protein OS=Mus musculus GN=Rab23 PE=1 SV=1	Q9D4I9	0.968	0.956508
Calcium load-activated calcium channel (Fragment) OS=Mus musculus GN=Tmco1 PE=1 SV=1	A0A0A6YVS2	1.43	0.628998
Muscleblind-like protein 2 OS=Mus musculus GN=Mbnl2 PE=2 SV=2	Q8C181	1.071	0.940541
COP9 signalosome complex subunit 1 OS=Mus musculus GN=Gps1 PE=1 SV=1	Q99LD4	1.013	0.974103
Prosaposin OS=Mus musculus GN=Psap PE=1 SV=1	K3W4L3	0.833	0.403265
PX domain-containing protein 1 OS=Mus musculus GN=Pxdc1 PE=2 SV=2	Q8JZU6	1.169	0.848537
Carnitine O-acetyltransferase OS=Mus musculus GN=Crat PE=1 SV=1	H7BX88	1.08	0.932985
RNA-binding protein 25 OS=Mus musculus GN=Rbm25 PE=1 SV=2	B2RY56	0.901	0.79316
Acetolactate synthase-like protein OS=Mus musculus GN=Ilvbl PE=1 SV=1	Q8BU33	0.99	0.990877
Proteasomal ubiquitin receptor ADRM1 OS=Mus musculus GN=Adrm1 PE=1 SV=2	Q9JKV1	0.948	0.931015
Vacuolar-sorting protein SNF8 OS=Mus musculus GN=Snf8 PE=1 SV=1	A2A6M1
Calcium-regulated heat stable protein 1 OS=Mus musculus GN=Carhsp1 PE=1 SV=1	Q9CR86	0.944	0.949078
Ubiquitin-like protein 5 (Fragment) OS=Mus musculus GN=Ubl5 PE=1 SV=1	E0CYW1	1.155	0.79316
Sodium- and chloride-dependent glycine transporter 1 OS=Mus musculus GN=Slc6a9 PE=1 SV=1	E9Q517	0.98	0.993171
Cathepsin F OS=Mus musculus GN=Ctsf PE=1 SV=1	Q9R013	1.064	0.998835
Estradiol 17-beta-dehydrogenase 8 OS=Mus musculus GN=Hsd17b8 PE=1 SV=2	P50171	1.098	0.8982
Rab9 effector protein with kelch motifs OS=Mus musculus GN=Rabepk PE=1 SV=1	A2AUF7	0.888	0.680199
E3 ubiquitin-protein ligase RNF25 (Fragment) OS=Mus musculus GN=Rnf25 PE=1 SV=1	D3YXC4	1.025	0.990877
Choline-phosphate cytidylyltransferase A OS=Mus musculus GN=Pcyt1a PE=1 SV=1	P49586	1.055	0.991659
C-Jun-amino-terminal kinase-interacting protein 3 OS=Mus musculus GN=Mapk8ip3 PE=1 SV=1	E9Q6E0	1.302	0.419263
Inositol polyphosphate-5-phosphatase A OS=Mus musculus GN=Inpp5a PE=1 SV=1	E9QAS7	0.987	0.964418
Protein phosphatase 1 regulatory subunit 14A OS=Mus musculus GN=Ppp1r14a PE=1 SV=1	Q91VC7	1.06	0.931015
NEDD8-activating enzyme E1 catalytic subunit OS=Mus musculus GN=Uba3 PE=1 SV=2	Q8C878	1.115	0.711822
40S ribosomal protein SA OS=Mus musculus GN=Rpsa PE=1 SV=4	P14206	0.951	0.913137
AP-3 complex subunit mu-1 OS=Mus musculus GN=Ap3m1 PE=1 SV=1	Q9JKC8	0.947	0.910292
Lactation elevated protein 1 OS=Mus musculus GN=Lace1 PE=1 SV=1	Q3V384	0.985	0.96987
Thioredoxin domain-containing protein 17 OS=Mus musculus GN=Txndc17 PE=1 SV=1	Q9CQM5	0.919	0.819804
Mannose-P-dolichol utilization defect 1 protein OS=Mus musculus GN=Mpdu1 PE=1 SV=1	Q9R0Q9	1.226	0.64393
Tubulin beta-2A chain OS=Mus musculus GN=Tubb2a PE=1 SV=1	Q7TMM9	1.106	0.692395
Selenide, water dikinase 1 OS=Mus musculus GN=Sephs1 PE=1 SV=1	Q8BH69	1.125	0.971469
Phosphoglucomutase-like protein 5 OS=Mus musculus GN=Pgm5 PE=1 SV=2	Q8BZF8	1.004	0.994525
ADP-ribosylation factor-binding protein GGA1 OS=Mus musculus GN=Gga1 PE=1 SV=1	Q8R0H9	0.897	0.692395
Collagen alpha-1(XI) chain OS=Mus musculus GN=Col11a1 PE=1 SV=2	Q61245	0.858	0.576701
Protocadherin 1 (Fragment) OS=Mus musculus GN=Pcdh1 PE=1 SV=1	F7BJK1	0.963	0.949302
Dual-specificity mitogen-activated protein kinase kinase 7 (Fragment) OS=Mus musculus GN=Map2k7 PE=1 SV=1	A0A140LHN8	1	0.990877
Sorting nexin-27 OS=Mus musculus GN=Snx27 PE=1 SV=2	Q3UHD6	1.021	0.99918
4F2 cell-surface antigen heavy chain OS=Mus musculus GN=Slc3a2 PE=1 SV=1	P10852	1.051	0.900404
Protein kinase C and casein kinase II substrate protein 3 (Fragment) OS=Mus musculus GN=Pacsin3 PE=1 SV=1	A6PWR1	1.052	0.997319
Advillin OS=Mus musculus GN=Avil PE=1 SV=2	O88398	1.041	0.998835
Serine/threonine-protein phosphatase OS=Mus musculus GN=Ppp3cb PE=1 SV=1	E9Q6P2	1.175	0.649789
V-type proton ATPase subunit H OS=Mus musculus GN=Atp6v1h PE=1 SV=1	Q8BVE3	0.946	0.956508
GRIP and coiled-coil domain-containing protein 2 OS=Mus musculus GN=Gcc2 PE=1 SV=2	Q8CHG3	1.036	0.998835
Platelet-activating factor acetylhydrolase OS=Mus musculus GN=Pla2g7 PE=2 SV=2	Q60963	1.044	0.945707
Cytochrome P450 2S1 OS=Mus musculus GN=Cyp2s1 PE=1 SV=1	D3Z7F1	0.994	0.964418
Proline-rich transmembrane protein 2 OS=Mus musculus GN=Prrt2 PE=1 SV=1	E9PUL5	1.005	0.99918
Semaphorin-7A OS=Mus musculus GN=Sema7a PE=1 SV=1	Q9QUR8	1.303	0.64318
Aldehyde dehydrogenase family 16 member A1 OS=Mus musculus GN=Aldh16a1 PE=1 SV=1	A0A1B0GSU0	0.969	0.951832
Inactive ubiquitin carboxyl-terminal hydrolase 54 OS=Mus musculus GN=Usp54 PE=1 SV=2	Q8BL06	1.022	0.986163
Heterogeneous nuclear ribonucleoprotein Q OS=Mus musculus GN=Syncrip PE=1 SV=1	G3UZI2	0.927	0.848484
RalBP1-associated Eps domain-containing protein 1 (Fragment) OS=Mus musculus GN=Reps1 PE=1 SV=1	F6R6F1	1.086	0.972383
Peroxiredoxin-1 OS=Mus musculus GN=Prdx1 PE=1 SV=1	P35700	0.874	0.649789
Destrin OS=Mus musculus GN=Dstn PE=1 SV=3	Q9R0P5	0.884	0.711822
Serine/threonine-protein phosphatase 2A catalytic subunit beta isoform OS=Mus musculus GN=Ppp2cb PE=1 SV=1	P62715	1.1	0.888103
Perilipin-3 OS=Mus musculus GN=Plin3 PE=1 SV=1	Q9DBG5	0.915	0.807152
Basic leucine zipper and W2 domain-containing protein 1 OS=Mus musculus GN=Bzw1 PE=1 SV=1	A0A087WQS2	0.895	0.748167
Vasohibin-1 OS=Mus musculus GN=Vash1 PE=2 SV=4	Q8C1W1	1.086	0.971776
RELT-like 2 OS=Mus musculus GN=Rell2 PE=1 SV=1	Q8CFT0	1.719	0.0631242
Signal transducer and activator of transcription 2 OS=Mus musculus GN=Stat2 PE=1 SV=1	Q9WVL2	1.051	0.99918
Target of rapamycin complex subunit LST8 OS=Mus musculus GN=Mlst8 PE=1 SV=1	Q9DCJ1	1.082	0.986681
Dipeptidyl peptidase 3 OS=Mus musculus GN=Dpp3 PE=1 SV=2	Q99KK7	0.979	0.993171
Kinase OS=Mus musculus GN=Itpkb PE=1 SV=1	B2RXC2	1.014	0.99918
BRI3-binding protein OS=Mus musculus GN=Bri3bp PE=1 SV=1	Q8BXV2	1.086	0.955207
Cap-specific mRNA (nucleoside-2'-O-)-methyltransferase 1 OS=Mus musculus GN=Cmtr1 PE=1 SV=1	Q9DBC3	1.133	0.904785
Prothrombin OS=Mus musculus GN=F2 PE=1 SV=1	H7BX99	1.255	0.55696
Acyl carrier protein (Fragment) OS=Mus musculus GN=Ndufab1 PE=1 SV=1	F8WJ64	0.999	0.998835
Ribonuclease 4 OS=Mus musculus GN=Rnase4 PE=1 SV=1	Q9JJH1	0.999	0.990877
Histocompatibility 13 (Fragment) OS=Mus musculus GN=H13 PE=1 SV=1	A3KGR9	0.971	0.962644
Echinoderm microtubule-associated protein-like 4 OS=Mus musculus GN=Eml4 PE=1 SV=1	F8WJ93	1.123	0.906717
Plexin-B1 OS=Mus musculus GN=Plxnb1 PE=1 SV=2	Q8CJH3	1.014	0.973621
HD domain-containing protein 2 OS=Mus musculus GN=Hddc2 PE=1 SV=1	Q3SXD3	0.734	0.173633
Calsyntenin-1 OS=Mus musculus GN=Clstn1 PE=1 SV=1	Q9EPL2	1.029	0.998835
Osteopontin OS=Mus musculus GN=Spp1 PE=1 SV=1	F8WIP8	1.184	0.785669
26S proteasome non-ATPase regulatory subunit 8 OS=Mus musculus GN=Psmd8 PE=1 SV=2	Q9CX56	0.964	0.964418
PRA1 family protein 2 OS=Mus musculus GN=Praf2 PE=1 SV=1	Q9JIG8	1.154	0.778252
Clathrin coat assembly protein AP180 OS=Mus musculus GN=Snap91 PE=1 SV=1	Q61548	0.988	0.99918
Protein Wiz (Fragment) OS=Mus musculus GN=Wiz PE=1 SV=1	F6ZBR8	1.012	0.986163
Exportin-1 OS=Mus musculus GN=Xpo1 PE=1 SV=1	Q6P5F9	0.955	0.946834
Arylsulfatase B OS=Mus musculus GN=Arsb PE=1 SV=1	A0A0R4J138	0.955	0.928202
Sterol-4-alpha-carboxylate 3-dehydrogenase, decarboxylating OS=Mus musculus GN=Nsdhl PE=1 SV=1	Q9R1J0	1.016	0.998835
Sorting nexin-9 OS=Mus musculus GN=Snx9 PE=1 SV=1	Q91VH2	1.026	0.993171
Casein kinase II subunit beta OS=Mus musculus GN=Csnk2b PE=1 SV=1	G3UZX4	1.003	0.982014
Transitional endoplasmic reticulum ATPase OS=Mus musculus GN=Vcp PE=1 SV=4	Q01853	1.119	0.634878
AP-1 complex subunit beta-1 OS=Mus musculus GN=Ap1b1 PE=1 SV=2	O35643	0.987	0.998835
MHC class I receptor OS=Mus musculus GN=Klra1 PE=2 SV=1	Q8MHR8
Geranylgeranyl pyrophosphate synthase OS=Mus musculus GN=Ggps1 PE=1 SV=1	Q9WTN0	0.939	0.885612
Cullin-associated NEDD8-dissociated protein 2 OS=Mus musculus GN=Cand2 PE=1 SV=2	Q6ZQ73	0.909	0.821274
Neural Wiskott-Aldrich syndrome protein OS=Mus musculus GN=Wasl PE=1 SV=1	Q91YD9	1.113	0.841095
Alpha-2-macroglobulin receptor-associated protein OS=Mus musculus GN=Lrpap1 PE=1 SV=1	P55302	1.014	0.991659
Calcipressin-3 (Fragment) OS=Mus musculus GN=Rcan3 PE=1 SV=1	B0QZL9	1.269	0.861588
Sepiapterin reductase OS=Mus musculus GN=Spr PE=1 SV=1	Q64105	1.165	0.426824
Apolipoprotein C-I OS=Mus musculus GN=Apoc1 PE=1 SV=1	P34928	1.549	0.00388684
Annexin A7 OS=Mus musculus GN=Anxa7 PE=1 SV=2	Q07076	1.136	0.559579
Moesin OS=Mus musculus GN=Msn PE=1 SV=3	P26041	1.083	0.789791
SCY1-like protein 2 OS=Mus musculus GN=Scyl2 PE=1 SV=1	Q8CFE4	0.922	0.858313
Uridine phosphorylase 1 OS=Mus musculus GN=Upp1 PE=1 SV=2	P52624	1.069	0.994525
14-3-3 protein eta OS=Mus musculus GN=Ywhah PE=1 SV=2	P68510	0.951	0.962697
Dihydropyrimidinase-related protein 2 OS=Mus musculus GN=Dpysl2 PE=1 SV=2	O08553	0.932	0.913694
Kin of IRRE like 3 (Drosophila), isoform CRA_b OS=Mus musculus GN=Kirrel3 PE=1 SV=1	G5E8B6	1.06	0.994525
Serine/threonine-protein kinase 38-like OS=Mus musculus GN=Stk38l PE=1 SV=2	Q7TSE6	1.245	0.599778
Zinc finger CCCH domain-containing protein 15 OS=Mus musculus GN=Zc3h15 PE=1 SV=2	Q3TIV5	1.046	0.998835
Small glutamine-rich tetratricopeptide repeat-containing protein alpha OS=Mus musculus GN=Sgta PE=1 SV=2	Q8BJU0	0.961	0.963197
Sorting nexin-17 OS=Mus musculus GN=Snx17 PE=1 SV=2	Q8BVL3	1.103	0.931015
Fermitin family homolog 3 OS=Mus musculus GN=Fermt3 PE=1 SV=1	Q8K1B8	0.984	0.962697
Protocadherin 9 OS=Mus musculus GN=Pcdh9 PE=1 SV=1	A0A0A6YWY8	1.032	0.998835
Activated RNA polymerase II transcriptional coactivator p15 OS=Mus musculus GN=Sub1 PE=1 SV=3	P11031	0.652	0.000945865
Microtubule-associated protein 1A OS=Mus musculus GN=Map1a PE=1 SV=1	A2ARP8	0.911	0.84284
Lanosterol 14-alpha demethylase OS=Mus musculus GN=Cyp51a1 PE=1 SV=1	Q8K0C4	1.166	0.811359
Dynein light chain Tctex-type 3 OS=Mus musculus GN=Dynlt3 PE=1 SV=1	P56387	1.033	0.998835
Extended synaptotagmin-1 OS=Mus musculus GN=Esyt1 PE=1 SV=2	Q3U7R1	1.003	0.991659
Glutaredoxin-3 OS=Mus musculus GN=Glrx3 PE=1 SV=1	Q9CQM9	1.039	0.934971
NudC domain-containing protein 3 OS=Mus musculus GN=Nudcd3 PE=1 SV=3	Q8R1N4	1.096	0.93659
Pleckstrin homology domain-containing family B member 1 OS=Mus musculus GN=Plekhb1 PE=1 SV=1	Q9QYE9	1.064	0.96987
Regulator of nonsense transcripts 1 OS=Mus musculus GN=Upf1 PE=1 SV=2	Q9EPU0	0.955	0.931015
Protein Shroom2 OS=Mus musculus GN=Shroom2 PE=1 SV=1	A2ALU4	1.084	0.999445
Serine/threonine-protein phosphatase CPPED1 OS=Mus musculus GN=Cpped1 PE=1 SV=1	Q8BFS6	1.095	0.964418
Transcription factor BTF3 homolog 4 OS=Mus musculus GN=Btf3l4 PE=1 SV=1	Q9CQH7	0.926	0.848484
Fibromodulin OS=Mus musculus GN=Fmod PE=2 SV=1	P50608	1.173	0.871966
Protein FAM114A2 OS=Mus musculus GN=Fam114a2 PE=1 SV=2	Q8VE88	1.194	0.809558
RIKEN cDNA 9030617O03 gene OS=Mus musculus GN=9030617O03Rik PE=1 SV=1	E9QMK9	1.243	0.327385
Septin-6 OS=Mus musculus GN=Sept6 PE=1 SV=4	Q9R1T4	1.105	0.821274
Acylphosphatase-2 OS=Mus musculus GN=Acyp2 PE=1 SV=2	P56375	0.939	0.936417
Synapse-associated protein 1 OS=Mus musculus GN=Syap1 PE=1 SV=1	Q9D5V6	0.851	0.544191
Receptor expression-enhancing protein 1 OS=Mus musculus GN=Reep1 PE=1 SV=1	Q8BGH4	1.155	0.530169
Purkinje cell protein 4 OS=Mus musculus GN=Pcp4 PE=3 SV=2	P63054	1.037	0.942058
Small ubiquitin-related modifier 2 OS=Mus musculus GN=Sumo2 PE=1 SV=1	H7BWX9	1.018	0.998835
Exocyst complex component 1 OS=Mus musculus GN=Exoc1 PE=1 SV=1	Q6P1Y9	1.019	0.99918
Phospholipase D2 OS=Mus musculus GN=Pld2 PE=1 SV=2	P97813	1.11	0.962644
Glucosidase 2 subunit beta OS=Mus musculus GN=Prkcsh PE=1 SV=1	O08795	1.053	0.896258
Coiled-coil-helix-coiled-coil-helix domain-containing protein 7 (Fragment) OS=Mus musculus GN=Chchd7 PE=1 SV=1	B1AXC8	1.353	0.342342
Golgin subfamily A member 2 OS=Mus musculus GN=Golga2 PE=1 SV=1	E9PUQ5	0.7	0.106278
Putative adenosylhomocysteinase 2 OS=Mus musculus GN=Ahcyl1 PE=1 SV=1	Q80SW1	0.993	0.998835
Charged multivesicular body protein 4b OS=Mus musculus GN=Chmp4b PE=1 SV=2	Q9D8B3	0.893	0.720132
Eukaryotic translation initiation factor 3 subunit G OS=Mus musculus GN=Eif3g PE=1 SV=2	Q9Z1D1	1.01	0.986163
tRNA (guanine-N(7)-)-methyltransferase non-catalytic subunit WDR4 OS=Mus musculus GN=Wdr4 PE=1 SV=2	Q9EP82	1.569	0.0671461
Ferritin heavy chain OS=Mus musculus GN=Fth1 PE=1 SV=2	P09528	1.036	0.949078
Golgi resident protein GCP60 OS=Mus musculus GN=Acbd3 PE=1 SV=3	Q8BMP6	0.986	0.964418
Zinc transporter ZIP14 OS=Mus musculus GN=Slc39a14 PE=1 SV=1	Q75N73	1.276	0.774757
Sorbin and SH3 domain-containing protein 1 OS=Mus musculus GN=Sorbs1 PE=1 SV=1	D3Z5J3	0.992	0.979275
55 kDa erythrocyte membrane protein OS=Mus musculus GN=Mpp1 PE=1 SV=1	P70290	0.993	0.998835
Adenylyltransferase and sulfurtransferase MOCS3 OS=Mus musculus GN=Mocs3 PE=1 SV=1	A2BDX3	1.231	0.629625
Septin-8 (Fragment) OS=Mus musculus GN=Sept8 PE=1 SV=1	E0CYM4	1.18	0.855503
Protein YIF1B (Fragment) OS=Mus musculus GN=Yif1b PE=1 SV=1	A0A140LHN0	0.887	0.751624
Growth arrest-specific protein 7 OS=Mus musculus GN=Gas7 PE=1 SV=1	B1ATI9	0.866	0.654529
FUN14 domain-containing protein 2 OS=Mus musculus GN=Fundc2 PE=1 SV=1	Q9D6K8	0.9	0.746036
RNA-binding protein EWS OS=Mus musculus GN=Ewsr1 PE=1 SV=1	Q5SUT0	0.731	0.0829685
26S proteasome non-ATPase regulatory subunit 4 OS=Mus musculus GN=Psmd4 PE=1 SV=1	O35226	1.151	0.70369
Phytanoyl-CoA hydroxylase-interacting protein OS=Mus musculus GN=Phyhip PE=1 SV=1	Q8K0S0	0.978	0.990877
Polymerase I and transcript release factor OS=Mus musculus GN=Ptrf PE=1 SV=1	O54724	0.946	0.90853
Immunity-related GTPase family M protein 1 OS=Mus musculus GN=Irgm1 PE=1 SV=1	Q60766	0.882	0.696315
E3 ubiquitin-protein ligase Itchy OS=Mus musculus GN=Itch PE=1 SV=2	Q8C863	1.038	0.995649
Ermin OS=Mus musculus GN=Ermn PE=1 SV=1	Q5EBJ4	0.947	0.957575
Pseudokinase FAM20A OS=Mus musculus GN=Fam20a PE=1 SV=1	Q8CID3	1.022	0.990877
Ubiquitin-associated domain-containing protein 1 (Fragment) OS=Mus musculus GN=Ubac1 PE=1 SV=1	F6UMH9	0.918	0.813609
Cell adhesion molecule 2 (Fragment) OS=Mus musculus GN=Cadm2 PE=1 SV=1	G3UZM4	1.057	0.908716
BRCA1-A complex subunit BRE OS=Mus musculus GN=Bre PE=1 SV=3	D3Z7P0	0.911	0.84284
Glutathione peroxidase 3 OS=Mus musculus GN=Gpx3 PE=1 SV=2	P46412	0.867	0.675119
Keratin, type II cytoskeletal 2 epidermal OS=Homo sapiens GN=KRT2 PE=1 SV=2	P35908	1.573	7.8999e-07
Tyrosine-protein kinase CSK OS=Mus musculus GN=Csk PE=1 SV=2	P41241	0.952	0.916715
Actin-related protein 10 OS=Mus musculus GN=Actr10 PE=1 SV=2	Q9QZB7	0.941	0.907591
Dynein light chain roadblock-type 1 OS=Mus musculus GN=Dynlrb1 PE=1 SV=1	A2AVR9	1.047	0.962697
Protein kinase C delta type OS=Mus musculus GN=Prkcd PE=1 SV=1	Q1MX41	1.053	0.990877
Hematopoietic progenitor cell antigen CD34 OS=Mus musculus GN=Cd34 PE=1 SV=1	Q64314	0.871	0.718698
Pseudouridylate synthase 7 (Fragment) OS=Mus musculus GN=Pus7 PE=1 SV=1	F6XMS4	1.071	0.996898
Serine/threonine-protein phosphatase PP1-gamma catalytic subunit OS=Mus musculus GN=Ppp1cc PE=1 SV=1	P63087	1.276	0.249166
GTPase NRas OS=Mus musculus GN=Nras PE=1 SV=1	P08556	1.051	0.896258
Striatin-3 OS=Mus musculus GN=Strn3 PE=1 SV=1	Q9ERG2	1.073	0.967306
Protein cornichon homolog 4 OS=Mus musculus GN=Cnih4 PE=2 SV=1	Q9CX13	1.079	0.998835
MOB-like protein phocein OS=Mus musculus GN=Mob4 PE=1 SV=1	Q6PEB6	0.962	0.945707
Diphosphoinositol polyphosphate phosphohydrolase 3-alpha OS=Mus musculus GN=Nudt10 PE=1 SV=1	P0C027	1.07	0.986163
Replication protein A 32 kDa subunit OS=Mus musculus GN=Rpa2 PE=1 SV=1	Q62193	1.087	0.957138
m7GpppX diphosphatase OS=Mus musculus GN=Dcps PE=1 SV=1	Q9DAR7	1.004	0.993171
Non-syndromic hearing impairment protein 5 homolog OS=Mus musculus GN=Dfna5 PE=1 SV=1	E9Q5V3	0.985	0.971469
Glycogen [starch] synthase, muscle OS=Mus musculus GN=Gys1 PE=1 SV=2	Q9Z1E4	1.072	0.96987
Hydroxymethylglutaryl-CoA synthase, cytoplasmic OS=Mus musculus GN=Hmgcs1 PE=1 SV=1	Q8JZK9	1.019	0.982014
ProSAAS OS=Mus musculus GN=Pcsk1n PE=1 SV=2	Q9QXV0	1.068	0.846526
Elongator complex protein 6 OS=Mus musculus GN=Elp6 PE=2 SV=1	Q8BK75	1.089	0.971776
Membrane-associated phosphatidylinositol transfer protein 2 OS=Mus musculus GN=Pitpnm2 PE=1 SV=1	E9PYJ7	1.06	0.998835
Small VCP/p97-interacting protein OS=Mus musculus GN=Svip PE=3 SV=1	Q3UZP4	0.942	0.895214
Anamorsin OS=Mus musculus GN=Ciapin1 PE=1 SV=2	F8WIK0	0.886	0.634878
Heat shock protein 105 kDa OS=Mus musculus GN=Hsph1 PE=1 SV=2	Q61699	0.9	0.79316
Sodium/potassium-transporting ATPase subunit alpha-1 OS=Mus musculus GN=Atp1a1 PE=1 SV=1	Q8VDN2	0.862	0.594335
Kinesin-1 heavy chain OS=Mus musculus GN=Kif5b PE=1 SV=3	Q61768	0.997	0.994434
SAPS domain family, member 3, isoform CRA_c OS=Mus musculus GN=Ppp6r3 PE=1 SV=1	G5E8R4	1.054	0.995181
Calreticulin OS=Mus musculus GN=Calr PE=1 SV=1	P14211	0.926	0.8982
Four and a half LIM domains protein 1 OS=Mus musculus GN=Fhl1 PE=1 SV=1	A2AEX6	0.944	0.951081
IQ motif and SEC7 domain-containing protein 1 OS=Mus musculus GN=Iqsec1 PE=1 SV=1	A0A1D5RM83	1.123	0.871071
Guanine nucleotide-binding protein subunit gamma OS=Mus musculus GN=Gng12 PE=1 SV=1	A0A0N4SW28	0.932	0.888103
Adenosine deaminase-like protein OS=Mus musculus GN=Adal PE=2 SV=1	Q80SY6	0.876	0.738768
Proteasome inhibitor PI31 subunit OS=Mus musculus GN=Psmf1 PE=1 SV=1	Q8BHL8	1.04	0.993171
COP9 signalosome complex subunit 9 OS=Mus musculus GN=Cops9 PE=1 SV=1	D3Z159	0.828	0.344978
Protein C12orf4 homolog OS=Mus musculus GN=D6Wsu163e PE=1 SV=1	Q91YN0	1.069	0.993171
dCTP pyrophosphatase 1 OS=Mus musculus GN=Dctpp1 PE=1 SV=1	Q9QY93	0.934	0.888103
Dolichyl-diphosphooligosaccharide--protein glycosyltransferase subunit STT3A OS=Mus musculus GN=Stt3a PE=1 SV=1	P46978	0.97	0.96113
Protein LSM12 homolog OS=Mus musculus GN=Lsm12 PE=1 SV=1	A0A0A0MQC9	0.747	0.149296
Alpha-taxilin (Fragment) OS=Mus musculus GN=Txlna PE=1 SV=1	A2ADZ4	1.066	0.993171
Proteasome subunit alpha type-7 OS=Mus musculus GN=Psma7 PE=1 SV=1	Q9Z2U0	1.065	0.856751
SNARE-associated protein Snapin OS=Mus musculus GN=Snapin PE=1 SV=1	Q9Z266	1.287	0.480609
Aspartyl/asparaginyl beta-hydroxylase OS=Mus musculus GN=Asph PE=1 SV=1	A2AL85	1.053	0.96987
F-box only protein 22 OS=Mus musculus GN=Fbxo22 PE=1 SV=2	Q78JE5	1.213	0.589606
Calcipressin-2 OS=Mus musculus GN=Rcan2 PE=1 SV=1	Q9JHG2	1.246	0.612283
Annexin A11 OS=Mus musculus GN=Anxa11 PE=1 SV=2	P97384	0.988	0.986163
Tyrosine-protein kinase OS=Mus musculus GN=Jak1 PE=1 SV=1	B1ASP2	1.138	0.954997
Phosphotriesterase-related protein (Fragment) OS=Mus musculus GN=Pter PE=1 SV=2	A2AUR3	1.129	0.8982
Zinc phosphodiesterase ELAC protein 2 OS=Mus musculus GN=Elac2 PE=1 SV=1	B1ATP7	1.201	0.888103
Phosphoinositide 3-kinase regulatory subunit 4 OS=Mus musculus GN=Pik3r4 PE=1 SV=3	Q8VD65	1.193	0.671147
Phosphatidylinositol transfer protein beta isoform OS=Mus musculus GN=Pitpnb PE=1 SV=1	Q8JZZ5	0.93	0.883372
Hemoglobin subunit beta-H1 OS=Mus musculus GN=Hbb-bh1 PE=2 SV=3	P04444	1.054	0.996544
TBC1 domain family member 4 OS=Mus musculus GN=Tbc1d4 PE=1 SV=1	E0CX53	1.032	0.998835
Nucleolysin TIA-1 OS=Mus musculus GN=Tia1 PE=1 SV=1	Q8CII5	1.015	0.990877
N-fatty-acyl-amino acid synthase/hydrolase PM20D1 OS=Mus musculus GN=Pm20d1 PE=1 SV=1	Q8C165	1.021	0.990877
Cell differentiation protein RCD1 homolog OS=Mus musculus GN=Rqcd1 PE=1 SV=1	Q9JKY0
Fatty acid-binding protein, heart OS=Homo sapiens GN=FABP3 PE=1 SV=4	P05413	0.862	0.507445
Atlastin-2 OS=Mus musculus GN=Atl2 PE=1 SV=1	E9QND8	1.197	0.819804
Dedicator of cytokinesis protein 2 OS=Mus musculus GN=Dock2 PE=1 SV=1	D6RGU3	0.911	0.825876
Uncharacterized protein (Fragment) OS=Mus musculus GN=Gm44596 PE=4 SV=1	A0A0N4SVA0	1.064	0.971469
Ras suppressor protein 1 OS=Mus musculus GN=Rsu1 PE=1 SV=3	Q01730	1.037	0.990877
Kinesin-like protein KIF3A OS=Mus musculus GN=Kif3a PE=1 SV=2	P28741	0.969	0.956508
2-5A-dependent ribonuclease (Fragment) OS=Mus musculus GN=Rnasel PE=1 SV=1	S4R1J5
Neuroplastin OS=Mus musculus GN=Nptn PE=1 SV=3	P97300	0.968	0.990877
14-3-3 protein theta OS=Mus musculus GN=Ywhaq PE=1 SV=1	P68254	0.969	0.990877
Lipopolysaccharide-induced tumor necrosis factor-alpha factor homolog OS=Mus musculus GN=Litaf PE=1 SV=1	Q9JLJ0	1.051	0.991659
Translation initiation factor eIF-2B subunit alpha OS=Mus musculus GN=Eif2b1 PE=1 SV=1	Q99LC8	0.796	0.291575
Inter alpha-trypsin inhibitor, heavy chain 4 OS=Mus musculus GN=Itih4 PE=1 SV=1	E9Q5L2	1.479	0.0254239
Superoxide dismutase [Cu-Zn] OS=Mus musculus GN=Sod1 PE=1 SV=2	P08228	0.947	0.959092
N-acyl-aromatic-L-amino acid amidohydrolase (carboxylate-forming) OS=Mus musculus GN=Acy3 PE=1 SV=1	Q91XE4	1.02	0.993171
Protein quaking OS=Mus musculus GN=Qki PE=1 SV=1	Q9QYS9	0.979	0.990877
Ras-related protein R-Ras2 OS=Mus musculus GN=Rras2 PE=1 SV=1	P62071	1.131	0.937993
Glutathione S-transferase kappa 1 OS=Mus musculus GN=Gstk1 PE=1 SV=3	Q9DCM2	0.914	0.822159
Elongation factor 1-gamma OS=Mus musculus GN=Eef1g PE=1 SV=3	Q9D8N0	0.986	0.99918
Casein kinase I isoform gamma-2 OS=Mus musculus GN=Csnk1g2 PE=1 SV=1	Q8BVP5	1.286	0.627794
Pre-B-cell leukemia transcription factor-interacting protein 1 OS=Mus musculus GN=Pbxip1 PE=1 SV=2	Q3TVI8	1.067	0.951081
Coiled-coil domain-containing protein 25 OS=Mus musculus GN=Ccdc25 PE=1 SV=1	Q78PG9	0.765	0.170063
DmX-like protein 2 OS=Mus musculus GN=Dmxl2 PE=1 SV=3	Q8BPN8	1.022	0.964418
Voltage-dependent L-type calcium channel subunit beta-4 OS=Mus musculus GN=Cacnb4 PE=1 SV=2	Q8R0S4	0.921	0.821575
Anion exchange protein OS=Mus musculus GN=Slc4a4 PE=1 SV=1	A7E1Z5	0.778	0.104676
Cleavage and polyadenylation-specificity factor subunit 6 (Fragment) OS=Mus musculus GN=Cpsf6 PE=1 SV=1	H3BKW0	1.204	0.634878
LIM and SH3 domain protein 1 OS=Mus musculus GN=Lasp1 PE=1 SV=1	Q61792	0.909	0.832431
Ubiquitin-related modifier 1 OS=Mus musculus GN=Urm1 PE=1 SV=1	Q9D2P4	0.826	0.540137
PDZ and LIM domain protein 1 OS=Mus musculus GN=Pdlim1 PE=1 SV=4	O70400	0.925	0.860744
Syntaxin-8 OS=Mus musculus GN=Stx8 PE=1 SV=1	O88983	1.296	0.821274
Aspartoacylase OS=Mus musculus GN=Aspa PE=1 SV=2	Q8R3P0	1.016	0.970555
Cytochrome b-5, isoform CRA_a OS=Mus musculus GN=Cyb5a PE=1 SV=1	G5E850	1.079	0.896842
GRB2-associated-binding protein 1 OS=Mus musculus GN=Gab1 PE=1 SV=2	Q9QYY0	0.94	0.858313
Integrin alpha-M OS=Mus musculus GN=Itgam PE=1 SV=2	G5E8F1	0.97	0.971469
IST1 homolog OS=Mus musculus GN=Ist1 PE=1 SV=1	Q9CX00	0.871	0.609239
Purkinje cell protein 4-like protein 1 OS=Mus musculus GN=Pcp4l1 PE=1 SV=1	Q6W8Q3	0.954	0.956021
BolA-like protein 2 OS=Mus musculus GN=Bola2 PE=1 SV=1	Q8BGS2	1.057	0.970555
Replication protein A 70 kDa DNA-binding subunit OS=Mus musculus GN=Rpa1 PE=1 SV=2	Q5SWN2	1.003	0.993171
Cysteine-rich protein 1 OS=Mus musculus GN=Crip1 PE=1 SV=2	P63254	1.034	0.998835
Translational activator of cytochrome c oxidase 1 OS=Mus musculus GN=Taco1 PE=1 SV=1	Q8K0Z7	1.156	0.80452
Transmembrane protein 179 OS=Mus musculus GN=Tmem179 PE=2 SV=1	Q8BHH9	0.957	0.928202
CAD protein OS=Mus musculus GN=Cad PE=1 SV=1	E9QAI5	1.227	0.696315
Heterogeneous nuclear ribonucleoprotein D-like (Fragment) OS=Mus musculus GN=Hnrnpdl PE=1 SV=1	F6VQH5
Inhibitor of carbonic anhydrase OS=Mus musculus GN=Ica PE=1 SV=1	Q9DBD0	1.447	0.208206
Eukaryotic translation initiation factor 2B, subunit 3 OS=Mus musculus GN=Eif2b3 PE=1 SV=1	B1AUN2	0.974	0.93659
Phospholipase D1 OS=Mus musculus GN=Pld1 PE=1 SV=1	Q6NVF2	1.43	0.460694
Cholesterol 24-hydroxylase OS=Mus musculus GN=Cyp46a1 PE=1 SV=1	Q9WVK8	0.907	0.774225
Vacuolar protein-sorting-associated protein 25 OS=Mus musculus GN=Vps25 PE=1 SV=1	Q9CQ80	1.085	0.962644
Trans-Golgi network integral membrane protein 2 OS=Mus musculus GN=Tgoln2 PE=1 SV=1	Q62314	0.952	0.8996
Protein phosphatase 1 regulatory subunit 1B OS=Mus musculus GN=Ppp1r1b PE=1 SV=2	Q60829	1.216	0.509573
Clusterin OS=Mus musculus GN=Clu PE=1 SV=1	Q06890	0.905	0.771493
Cell adhesion molecule 3 OS=Mus musculus GN=Cadm3 PE=1 SV=1	Q99N28	0.979	0.995649
Clathrin light chain A OS=Mus musculus GN=Clta PE=1 SV=2	O08585	0.988	0.998983
SMT3 suppressor of mif two 3 homolog 3 (Yeast), isoform CRA_b OS=Mus musculus GN=Sumo3 PE=1 SV=1	G3UWX9	0.962	0.940082
Paralemmin-3 OS=Mus musculus GN=Palm3 PE=1 SV=1	A2TJV2	0.954	0.899577
Ectonucleoside triphosphate diphosphohydrolase 1 OS=Mus musculus GN=Entpd1 PE=1 SV=1	P55772	0.876	0.695404
Prefoldin 1 OS=Mus musculus GN=Pfdn1 PE=1 SV=1	Q9CQF7	0.947	0.936051
Kinesin-like protein KIF3B OS=Mus musculus GN=Kif3b PE=1 SV=1	Q61771	1.225	0.629625
Histone-lysine N-methyltransferase SETD7 OS=Mus musculus GN=Setd7 PE=1 SV=2	Q8VHL1	1.046	0.964418
Heterogeneous nuclear ribonucleoprotein R OS=Mus musculus GN=Hnrnpr PE=1 SV=1	Q8VHM5	0.959	0.907381
Pantothenate kinase 1 OS=Mus musculus GN=Pank1 PE=1 SV=1	Q8K4K6	1.172	0.891075
Calretinin OS=Mus musculus GN=Calb2 PE=1 SV=3	Q08331	1.001	0.993171
Synaptosomal-associated protein 29 OS=Mus musculus GN=Snap29 PE=1 SV=1	Q9ERB0	1.077	0.956508
Dihydropyrimidinase-related protein 1 OS=Mus musculus GN=Crmp1 PE=1 SV=1	P97427	1.215	0.627794
Tubulin--tyrosine ligase-like protein 12 OS=Mus musculus GN=Ttll12 PE=1 SV=1	Q3UDE2	1.064	0.860744
P2X purinoceptor 7 OS=Mus musculus GN=P2rx7 PE=1 SV=2	Q9Z1M0
Rho guanine nucleotide exchange factor 1 OS=Mus musculus GN=Arhgef1 PE=1 SV=2	Q61210	1.024	0.991659
Sphingosine-1-phosphate lyase 1 OS=Mus musculus GN=Sgpl1 PE=1 SV=1	Q8R0X7	0.904	0.737359
Ankyrin 1, erythroid OS=Mus musculus GN=Ank1 PE=1 SV=1	G5E8J2	1.153	0.483251
Proliferation-associated protein 2G4 OS=Mus musculus GN=Pa2g4 PE=1 SV=3	P50580	0.927	0.875018
Atlastin-3 OS=Mus musculus GN=Atl3 PE=1 SV=1	Q91YH5	0.991	0.995649
Protein LZIC OS=Mus musculus GN=Lzic PE=1 SV=1	Q8K3C3	0.992	0.979275
Ubiquitin-conjugating enzyme E2 G2 (Fragment) OS=Mus musculus GN=Ube2g2 PE=1 SV=1	G3UZX2	0.86	0.618146
Serine/threonine-protein kinase 4 OS=Mus musculus GN=Stk4 PE=1 SV=1	Q9JI11	1.234	0.747094
Lumican OS=Bos taurus GN=LUM PE=1 SV=1	Q05443	1.732	0.00250711
Heat shock 70 kDa protein 1A OS=Mus musculus GN=Hspa1a PE=1 SV=2	Q61696	1.05	0.949078
6-phosphofructo-2-kinase/fructose-2,6-bisphosphatase 2 OS=Mus musculus GN=Pfkfb2 PE=1 SV=1	A0A087WRG0	1.045	0.990877
Staphylococcal nuclease domain-containing protein 1 OS=Mus musculus GN=Snd1 PE=1 SV=1	Q78PY7	1.082	0.858313
Lysophospholipase-like protein 1 OS=Mus musculus GN=Lyplal1 PE=1 SV=1	E9QLB2	1.13	0.861588
Protein FAM192A (Fragment) OS=Mus musculus GN=Fam192a PE=1 SV=1	A0A1D5RM30
Antithrombin-III (Fragment) OS=Mus musculus GN=Serpinc1 PE=1 SV=1	A0A0A6YX70	1.5	0.0502422
Phosphatidylcholine transfer protein OS=Mus musculus GN=Pctp PE=1 SV=1	Q5SV41	0.851	0.542532
E3 ubiquitin-protein ligase LRSAM1 OS=Mus musculus GN=Lrsam1 PE=1 SV=1	Q80ZI6	1.025	0.998835
Oxysterol-binding protein OS=Mus musculus GN=Osbpl1a PE=1 SV=1	Q3V156	1.027	0.96113
Uncharacterized protein OS=Mus musculus GN=Gm20431 PE=3 SV=1	E9PY39	1.042	0.927878
Acyl-CoA-binding protein OS=Mus musculus GN=Dbi PE=1 SV=2	P31786	1.031	0.955207
Breakpoint cluster region protein OS=Mus musculus GN=Bcr PE=1 SV=3	Q6PAJ1	1.108	0.962644
Peroxisomal coenzyme A diphosphatase NUDT7 OS=Mus musculus GN=Nudt7 PE=1 SV=2	Q99P30	1.872	0.00634125
Peroxisomal multifunctional enzyme type 2 OS=Mus musculus GN=Hsd17b4 PE=1 SV=3	P51660	1.017	0.96987
Protein transport protein Sec61 subunit alpha isoform 1 OS=Mus musculus GN=Sec61a1 PE=1 SV=2	P61620	0.931	0.846664
Lysine-specific histone demethylase 1A (Fragment) OS=Mus musculus GN=Kdm1a PE=1 SV=1	G8JL40	1.078	0.993171
26S proteasome non-ATPase regulatory subunit 4 (Fragment) OS=Mus musculus GN=Psmd4 PE=1 SV=1	F7AI87	1.239	0.858715
Disintegrin and metalloproteinase domain-containing protein 17 OS=Mus musculus GN=Adam17 PE=1 SV=1	E9PXU2	0.899	0.815513
Ras-related protein M-Ras (Fragment) OS=Mus musculus GN=Mras PE=1 SV=1	D3Z2V6	0.928	0.831282
Adhesion G protein-coupled receptor L1 OS=Mus musculus GN=Adgrl1 PE=1 SV=2	Q80TR1	1.023	0.998835
Fatty acid-binding protein, heart OS=Mus musculus GN=Fabp3 PE=1 SV=5	P11404	1.145	0.456636
Phospholipid transfer protein C2CD2L OS=Mus musculus GN=C2cd2l PE=1 SV=3	Q80X80	1.24	0.610286
Crystallin, zeta (Quinone reductase)-like 1, isoform CRA_h OS=Mus musculus GN=Cryzl1 PE=1 SV=1	D3Z6I4	1.076	0.964418
Coiled-coil domain-containing protein 85C OS=Mus musculus GN=Ccdc85c PE=1 SV=1	E9Q6B2	1.172	0.895375
Peroxisomal N(1)-acetyl-spermine/spermidine oxidase OS=Mus musculus GN=Paox PE=1 SV=3	Q8C0L6	1.113	0.907381
Transaldolase OS=Mus musculus GN=Taldo1 PE=1 SV=2	Q93092	0.865	0.612283
Keratin, type I cytoskeletal 14 OS=Homo sapiens GN=KRT14 PE=1 SV=4	P02533
Probable tRNA (uracil-O(2)-)-methyltransferase OS=Mus musculus GN=Trmt44 PE=2 SV=2	Q9D2Q2
Deubiquitinating protein VCIP135 OS=Mus musculus GN=Vcpip1 PE=1 SV=1	Q8CDG3	0.926	0.84284
Probable UDP-sugar transporter protein SLC35A4 OS=Mus musculus GN=Slc35a4 PE=1 SV=1	A0A087WQH8	1.095	0.907381
THUMP domain-containing protein 3 (Fragment) OS=Mus musculus GN=Thumpd3 PE=1 SV=8	D3YYB2	0.912	0.787111
BCL2/adenovirus E1B 19 kDa protein-interacting protein 3-like OS=Mus musculus GN=Bnip3l PE=1 SV=1	Q91Z78
RasGAP-activating-like protein 1 OS=Mus musculus GN=Rasal1 PE=1 SV=2	Q9Z268	1.032	0.999044
Claudin-11 OS=Mus musculus GN=Cldn11 PE=1 SV=1	Q60771	1.007	0.998835
Catechol O-methyltransferase OS=Mus musculus GN=Comt PE=1 SV=2	O88587	1.167	0.424201
Choline transporter-like protein 2 OS=Mus musculus GN=Slc44a2 PE=1 SV=1	A0A1L1SVG6	1.023	0.964418
MCG121921, isoform CRA_b OS=Mus musculus GN=Rnf141 PE=1 SV=1	H3BJB4	1.058	0.994525
MCG3478 OS=Mus musculus GN=Sez6l PE=1 SV=1	A0A0R4J0Y4	1.307	0.695794
Serine dehydratase-like OS=Mus musculus GN=Sdsl PE=1 SV=1	Q8R238	1.16	0.84284
Nicotinamide nucleotide adenylyltransferase 3, isoform CRA_a OS=Mus musculus GN=Nmnat3 PE=1 SV=1	Q3V3F1	1.184	0.828472
SH3 domain-binding glutamic acid-rich-like protein OS=Mus musculus GN=Sh3bgrl2 PE=1 SV=1	A0A087WS96	0.916	0.778694
26S proteasome non-ATPase regulatory subunit 12 OS=Mus musculus GN=Psmd12 PE=1 SV=4	Q9D8W5	1.014	0.998835
Complement C1q subcomponent subunit A OS=Mus musculus GN=C1qa PE=1 SV=2	P98086	0.791	0.18444
Tubulin polymerization-promoting protein OS=Mus musculus GN=Tppp PE=1 SV=1	Q7TQD2	0.862	0.593198
Serine/threonine-protein kinase MRCK alpha OS=Mus musculus GN=Cdc42bpa PE=1 SV=1	D3YYN8	1.38	0.596603
Thioredoxin domain-containing protein 5 OS=Mus musculus GN=Txndc5 PE=1 SV=1	E9PXX7	1.08	0.962644
Baculoviral IAP repeat-containing protein 6 OS=Mus musculus GN=Birc6 PE=1 SV=2	O88738	1.12	0.916673
Probable tRNA N6-adenosine threonylcarbamoyltransferase OS=Mus musculus GN=Osgep PE=1 SV=1	A0A0R4J1Y3	1.097	0.956508
Glutathione S-transferase Mu 1 OS=Mus musculus GN=Gstm1 PE=1 SV=2	P10649	0.962	0.977666
Signal transducer and activator of transcription 3 OS=Mus musculus GN=Stat3 PE=1 SV=2	P42227	0.858	0.539625
Ras-related protein Rab-3A OS=Mus musculus GN=Rab3a PE=1 SV=1	P63011	0.99	0.998835
FERM domain-containing protein 8 (Fragment) OS=Mus musculus GN=Frmd8 PE=1 SV=8	D3Z5B2	1.22	0.931015
Mitogen-activated protein kinase 3 OS=Mus musculus GN=Mapk3 PE=1 SV=5	Q63844	1.089	0.773461
Nardilysin OS=Mus musculus GN=Nrdc PE=1 SV=1	Q8BHG1	1.18	0.629625
Afamin OS=Mus musculus GN=Afm PE=1 SV=2	O89020	1.254	0.634891
Kinesin-associated protein 3 OS=Mus musculus GN=Kifap3 PE=1 SV=1	P70188	0.82	0.483251
Protein PRRC2C OS=Mus musculus GN=Prrc2c PE=1 SV=1	A0A0A0MQ79	1.085	0.973621
Epididymis-specific alpha-mannosidase OS=Mus musculus GN=Man2b2 PE=1 SV=2	O54782	1.016	0.990877
Phosphoribosyl pyrophosphate synthetase 1-like 3 OS=Mus musculus GN=Prps1l3 PE=3 SV=1	G3UXL2	1.097	0.738768
Protein kinase C zeta type OS=Mus musculus GN=Prkcz PE=1 SV=1	Q3V341	0.967	0.949078
Tyrosine-protein phosphatase non-receptor type 5 OS=Mus musculus GN=Ptpn5 PE=1 SV=2	P54830	1.376	0.496176
DCN1-like protein OS=Mus musculus GN=Dcun1d1 PE=1 SV=1	Q3UT23	0.817	0.27531
Clathrin heavy chain 1 OS=Mus musculus GN=Cltc PE=1 SV=3	Q68FD5	1.08	0.802779
Actin-related protein 2/3 complex subunit 1B OS=Mus musculus GN=Arpc1b PE=1 SV=4	Q9WV32	1.017	0.98699
Glycylpeptide N-tetradecanoyltransferase 2 OS=Mus musculus GN=Nmt2 PE=1 SV=1	O70311	1.185	0.8619
Pre-rRNA-processing protein TSR2 homolog OS=Mus musculus GN=Tsr2 PE=1 SV=1	H7BWY8	1.023	0.998117
Receptor-type tyrosine-protein phosphatase OS=Mus musculus GN=Ptpre PE=1 SV=1	A0A1B0GRT6	0.848	0.53611
SWI/SNF-related matrix-associated actin-dependent regulator of chromatin subfamily B member 1 OS=Mus musculus GN=Smarcb1 PE=1 SV=1	Q9Z0H3
Cullin-3 OS=Mus musculus GN=Cul3 PE=1 SV=1	Q9JLV5	0.945	0.934971
COMM domain-containing protein 8 OS=Mus musculus GN=Commd8 PE=1 SV=1	Q9CZG3	0.941	0.8982
Cytoglobin OS=Mus musculus GN=Cygb PE=1 SV=1	Q9CX80	1.031	0.964418
Inositol polyphosphate 1-phosphatase OS=Mus musculus GN=Inpp1 PE=1 SV=2	P49442	0.918	0.84284
Trafficking protein particle complex subunit 6B OS=Mus musculus GN=Trappc6b PE=1 SV=1	Q9D289	0.979	0.978724
Ubiquitin conjugation factor E4 B OS=Mus musculus GN=Ube4b PE=1 SV=3	Q9ES00	1.011	0.995649
Protein S100-A8 OS=Mus musculus GN=S100a8 PE=1 SV=3	P27005	1.351	0.267859
Ragulator complex protein LAMTOR3 OS=Mus musculus GN=Lamtor3 PE=1 SV=1	O88653	1.066	0.993171
Col4a5 protein OS=Mus musculus GN=Col4a5 PE=1 SV=1	Q63ZW6	0.826	0.627794
Metallothionein-2 OS=Mus musculus GN=Mt2 PE=1 SV=2	P02798	0.621	4.36272e-06
Sphingosine kinase 2 OS=Mus musculus GN=Sphk2 PE=1 SV=2	Q9JIA7	0.974	0.945997
Receptor-type tyrosine-protein phosphatase delta OS=Mus musculus GN=Ptprd PE=1 SV=2	E9PVW8	0.997	0.998835
Guanine deaminase OS=Mus musculus GN=Gda PE=1 SV=1	Q9R111	1.061	0.993171
Collagen alpha-1(XXV) chain OS=Mus musculus GN=Col25a1 PE=4 SV=1	V9GWX5	0.91	0.824989
Protein S100 OS=Mus musculus GN=S100a1 PE=1 SV=1	Q91V77	0.653	1.42214e-05
Tetratricopeptide repeat protein 23-like (Fragment) OS=Mus musculus GN=Ttc23l PE=4 SV=1	F6SJC5	1.347	0.27531
Vesicular inhibitory amino acid transporter OS=Mus musculus GN=Slc32a1 PE=1 SV=3	O35633	0.934	0.895214
Polyglutamine-binding protein 1 (Fragment) OS=Mus musculus GN=Pqbp1 PE=1 SV=1	A2AER8
Ubiquitin-conjugating enzyme E2 D3 OS=Mus musculus GN=Ube2d3 PE=1 SV=1	P61079	0.894	0.693501
Ras-specific guanine nucleotide-releasing factor 2 OS=Mus musculus GN=Rasgrf2 PE=1 SV=2	P70392	0.917	0.851365
RUN and FYVE domain-containing protein 2 OS=Mus musculus GN=Rufy2 PE=1 SV=1	D6RET4	1.24	0.668646
Zinc finger ZZ-type and EF-hand domain-containing protein 1 OS=Mus musculus GN=Zzef1 PE=1 SV=2	Q5SSH7
NEDD8-conjugating enzyme Ubc12 OS=Mus musculus GN=Ube2m PE=1 SV=1	P61082	1.106	0.69064
Syntaxin-binding protein 5-like OS=Mus musculus GN=Stxbp5l PE=1 SV=1	Q5DQR4	1.304	0.634891
Ras-related protein Rab-11B OS=Mus musculus GN=Rab11b PE=1 SV=3	P46638	1.066	0.851365
Peptidyl-prolyl cis-trans isomerase D OS=Mus musculus GN=Ppid PE=1 SV=3	Q9CR16	0.87	0.634878
Estradiol 17-beta-dehydrogenase 11 OS=Mus musculus GN=Hsd17b11 PE=1 SV=1	Q9EQ06	0.892	0.771493
Signal recognition particle 72 OS=Mus musculus GN=Srp72 PE=1 SV=1	E9Q740	0.932	0.892117
Protein FAM98B OS=Mus musculus GN=Fam98b PE=1 SV=1	Q80VD1	0.838	0.478166
F-actin-capping protein subunit alpha-1 OS=Mus musculus GN=Capza1 PE=1 SV=4	P47753	0.935	0.884382
Serine incorporator 1 OS=Mus musculus GN=Serinc1 PE=1 SV=1	E9Q553	0.997	0.964418
Ribonuclease UK114 OS=Mus musculus GN=Hrsp12 PE=1 SV=3	P52760	1.09	0.771493
Uncharacterized protein C18orf8 homolog OS=Mus musculus GN=Mic1 PE=2 SV=1	Q8VC42	1.172	0.79316
GDP-L-fucose synthase OS=Mus musculus GN=Tsta3 PE=1 SV=3	P23591	1.282	0.5078
Transmembrane protein 160 OS=Mus musculus GN=Tmem160 PE=2 SV=1	Q9D938	1.157	0.868389
Steroid receptor RNA activator 1 OS=Mus musculus GN=Sra1 PE=1 SV=3	Q80VJ2	0.823	0.443418
Putative uncharacterized protein OS=Mus musculus GN=Snx12 PE=1 SV=1	Q3TGS7	0.966	0.964418
Protein bassoon OS=Mus musculus GN=Bsn PE=1 SV=4	O88737	1.043	0.993171
Exocyst complex component 4 OS=Mus musculus GN=Exoc4 PE=1 SV=2	O35382	0.986	0.970734
Thiamin pyrophosphokinase 1 OS=Mus musculus GN=Tpk1 PE=1 SV=1	Q9R0M5	1.138	0.917973
Isoaspartyl peptidase/L-asparaginase OS=Mus musculus GN=Asrgl1 PE=1 SV=1	Q8C0M9	1.033	0.949302
Myelin basic protein (Fragment) OS=Mus musculus GN=Mbp PE=1 SV=1	F6VME3	0.993	0.998835
Putative uncharacterized protein OS=Mus musculus GN=Tfg PE=1 SV=1	Q9Z1A1	1.055	0.891428
Ubiquitin-like protein 4A OS=Mus musculus GN=Ubl4a PE=1 SV=1	P21126	1.092	0.951081
Centromere/kinetochore protein zw10 homolog OS=Mus musculus GN=Zw10 PE=1 SV=3	O54692	0.826	0.55696
Mannosyl-oligosaccharide glucosidase OS=Mus musculus GN=Mogs PE=1 SV=1	Q80UM7	1.223	0.770804
Proteasome activator complex subunit 1 OS=Mus musculus GN=Psme1 PE=1 SV=2	P97371	0.888	0.634878
Neuronal membrane glycoprotein M6-a OS=Mus musculus GN=Gpm6a PE=1 SV=1	P35802	1.03	0.949452
Prenylcysteine oxidase OS=Mus musculus GN=Pcyox1 PE=1 SV=1	Q9CQF9	1.099	0.759148
Sec24-related gene family, member B (S. cerevisiae) (Fragment) OS=Mus musculus GN=Sec24b PE=1 SV=1	F6VJC5	1.079	0.964418
Amyloid beta A4 precursor protein-binding family B member 2 OS=Mus musculus GN=Apbb2 PE=1 SV=1	E9PWH3	0.975	0.964418
Reticulon-4 OS=Mus musculus GN=Rtn4 PE=1 SV=2	Q99P72	0.987	0.99918
Endosomal/lysomomal potassium channel TMEM175 OS=Mus musculus GN=Tmem175 PE=1 SV=2	Q9CXY1	1.286	0.774133
Myosin light chain 6B OS=Mus musculus GN=Myl6b PE=1 SV=1	Q8CI43	1.044	0.999595
Prostaglandin E synthase 3 OS=Mus musculus GN=Ptges3 PE=1 SV=1	D3Z7C6	0.943	0.949078
Ankyrin repeat domain 29 OS=Mus musculus GN=Ankrd29 PE=1 SV=1	D3YVV3	0.969	0.956508
Hemicentin-1 OS=Mus musculus GN=Hmcn1 PE=1 SV=1	D3YXG0	1.109	0.964418
Dehydrogenase/reductase SDR family member 11 OS=Mus musculus GN=Dhrs11 PE=1 SV=1	F2Z445	1.057	0.990877
Ezrin OS=Mus musculus GN=Ezr PE=1 SV=3	P26040	1.127	0.565255
Nuclear distribution protein nudE-like 1 OS=Mus musculus GN=Ndel1 PE=1 SV=2	Q9ERR1	1.072	0.982958
Origin recognition complex subunit 2 OS=Mus musculus GN=Orc2 PE=1 SV=1	Q59IX1	0.937	0.875018
Carbonic anhydrase 1 OS=Mus musculus GN=Ca1 PE=1 SV=4	P13634	1.532	0.00147824
Eukaryotic translation initiation factor 3 subunit B OS=Mus musculus GN=Eif3b PE=1 SV=1	Q8JZQ9	1.19	0.751624
Calbindin OS=Mus musculus GN=Calb1 PE=1 SV=2	P12658	1.056	0.924462
Dipeptidyl aminopeptidase-like protein 6 OS=Mus musculus GN=Dpp6 PE=1 SV=1	Q5U4C2	0.967	0.97403
Transportin-3 OS=Mus musculus GN=Tnpo3 PE=1 SV=1	Q6P2B1	1.115	0.907381
Tight junction protein ZO-1 OS=Mus musculus GN=Tjp1 PE=1 SV=2	P39447	1.266	0.644601
Gasdermin-C3 OS=Mus musculus GN=Gsdmc3 PE=2 SV=2	Q8CB12	1.183	0.961157
KN motif and ankyrin repeat domain-containing protein 4 OS=Mus musculus GN=Kank4 PE=1 SV=1	Q6P9J5	0.921	0.846373
Immunoglobulin J chain OS=Mus musculus GN=Jchain PE=1 SV=4	P01592	1.209	0.904416
Cyclin-dependent kinase-like 5 OS=Mus musculus GN=Cdkl5 PE=1 SV=1	Q3UTQ8	0.964	0.956508
Transgelin-2 OS=Mus musculus GN=Tagln2 PE=1 SV=4	Q9WVA4	0.94	0.940082
Proteasome subunit alpha type-4 OS=Mus musculus GN=Psma4 PE=1 SV=1	Q9R1P0	0.928	0.906717
Tuberin OS=Mus musculus GN=Tsc2 PE=1 SV=1	Q7TT21	1.213	0.783526
Cell cycle exit and neuronal differentiation protein 1 OS=Mus musculus GN=Cend1 PE=1 SV=1	Q9JKC6	0.795	0.169057
Voltage-dependent calcium channel gamma-8 subunit OS=Mus musculus GN=Cacng8 PE=1 SV=1	Q8VHW2	1.012	0.990877
Glutathione S-transferase omega-1 OS=Mus musculus GN=Gsto1 PE=1 SV=2	O09131	1.071	0.855503
Protein argonaute-1 OS=Mus musculus GN=Ago1 PE=1 SV=2	Q8CJG1	1.112	0.939771
Putative hydrolase RBBP9 OS=Mus musculus GN=Rbbp9 PE=1 SV=2	O88851	1.052	0.896258
Syntaxin-binding protein 1 OS=Mus musculus GN=Stxbp1 PE=1 SV=2	O08599	0.913	0.851365
Peroxiredoxin-4 OS=Mus musculus GN=Prdx4 PE=1 SV=1	O08807	1.021	0.998835
GTP-binding protein Rit2 OS=Mus musculus GN=Rit2 PE=1 SV=1	P70425	1.001	0.96987
Protein SEC13 homolog OS=Mus musculus GN=Sec13 PE=1 SV=3	Q9D1M0	0.967	0.968772
BolA-like protein 3 OS=Mus musculus GN=Bola3 PE=1 SV=1	E9Q705	0.853	0.605751
VIP36-like protein OS=Mus musculus GN=Lman2l PE=1 SV=1	P59481	1.203	0.77296
Disabled homolog 2 OS=Mus musculus GN=Dab2 PE=1 SV=2	P98078	1.008	0.970555
Multifunctional methyltransferase subunit TRM112-like protein OS=Mus musculus GN=Trmt112 PE=1 SV=1	Q9DCG9	1.163	0.760891
Sideroflexin-5 OS=Mus musculus GN=Sfxn5 PE=1 SV=2	Q925N0	0.799	0.368488
Serine/arginine-rich-splicing factor 11 (Fragment) OS=Mus musculus GN=Srsf11 PE=1 SV=1	D3Z4B0	0.906	0.774133
Aldose 1-epimerase OS=Mus musculus GN=Galm PE=1 SV=1	Q8K157	1.069	0.971469
Ras-related protein Rab-5C OS=Mus musculus GN=Rab5c PE=1 SV=2	P35278	1.008	0.989182
FXYD domain-containing ion transport regulator 7 OS=Mus musculus GN=Fxyd7 PE=1 SV=1	A0A0U1RPY2	0.766	0.170263
Protein SCAI OS=Mus musculus GN=Scai PE=1 SV=2	Q8C8N2	1.177	0.750211
Alpha-crystallin B chain OS=Mus musculus GN=Cryab PE=1 SV=2	P23927	1.002	0.993171
Ubiquitin carboxyl-terminal hydrolase 46 OS=Mus musculus GN=Usp46 PE=1 SV=1	D3YVU0	1.265	0.620574
ATP-binding cassette sub-family F member 1 OS=Mus musculus GN=Abcf1 PE=1 SV=1	Q6P542	1.137	0.848484
Pyrroline-5-carboxylate reductase 2 OS=Mus musculus GN=Pycr2 PE=1 SV=1	Q922Q4	1.027	0.998835
Collagen alpha-1(XXIV) chain OS=Mus musculus GN=Col24a1 PE=2 SV=2	Q30D77	0.941	0.907381
Epidermal growth factor receptor OS=Mus musculus GN=Egfr PE=1 SV=1	Q01279	1.213	0.680199
Nck-associated protein 1 OS=Mus musculus GN=Nckap1 PE=1 SV=2	P28660	0.922	0.854428
Protein canopy homolog 4 (Fragment) OS=Mus musculus GN=Cnpy4 PE=1 SV=1	D3Z0T5	1.003	0.972383
Wiskott-Aldrich syndrome protein family member 1 OS=Mus musculus GN=Wasf1 PE=1 SV=2	Q8R5H6	1.112	0.917481
RuvB-like 1 OS=Mus musculus GN=Ruvbl1 PE=1 SV=1	P60122	1.021	0.998905
Stromal interaction molecule 1 OS=Mus musculus GN=Stim1 PE=1 SV=1	A0A1B0GR78	1.028	0.998835
1,2-dihydroxy-3-keto-5-methylthiopentene dioxygenase OS=Mus musculus GN=Adi1 PE=1 SV=1	Q99JT9	1.01	0.994448
Phosphatidylinositol-binding clathrin assembly protein OS=Mus musculus GN=Picalm PE=1 SV=1	Q7M6Y3	1.002	0.994525
Protein SOGA3 OS=Mus musculus GN=Soga3 PE=1 SV=2	Q6NZL0	1.127	0.70731
Protein kinase C delta-binding protein OS=Mus musculus GN=Prkcdbp PE=1 SV=1	Q91VJ2	1.339	0.627794
Polymerase delta-interacting protein 2 (Fragment) OS=Mus musculus GN=Poldip2 PE=1 SV=1	F6SQH7
Cytoplasmic FMR1-interacting protein 1 OS=Mus musculus GN=Cyfip1 PE=1 SV=1	Q7TMB8	0.991	0.999445
Protein FAM234A (Fragment) OS=Mus musculus GN=Fam234a PE=1 SV=1	F6SQM4	1.037	0.99918
CLIP-associating protein 2 OS=Mus musculus GN=Clasp2 PE=1 SV=1	E9Q8N5	0.959	0.964418
Glutamate carboxypeptidase 2 OS=Mus musculus GN=Folh1 PE=1 SV=2	O35409	0.978	0.993171
Phosphoribosyl pyrophosphate synthase-associated protein 2 OS=Mus musculus GN=Prpsap2 PE=1 SV=1	Q8R574	1.021	0.990877
Homeodomain-only protein OS=Mus musculus GN=Hopx PE=1 SV=1	Q8R1H0	0.979	0.964418
Xanthine dehydrogenase/oxidase OS=Mus musculus GN=Xdh PE=1 SV=5	Q00519	0.99	0.964418
Peripherin OS=Mus musculus GN=Prph PE=1 SV=2	P15331	0.721	0.00601346
Ppm1b protein OS=Mus musculus GN=Ppm1b PE=1 SV=1	Q99NF7	1.105	0.959092
Junctional adhesion molecule C OS=Mus musculus GN=Jam3 PE=1 SV=2	Q9D8B7	0.917	0.787111
Afadin OS=Mus musculus GN=Afdn PE=1 SV=2	E9Q852	1.059	0.989596
MAP7 domain-containing protein 1 OS=Mus musculus GN=Map7d1 PE=1 SV=1	A2AJI1	0.963	0.94959
Nuclear pore membrane glycoprotein 210 OS=Mus musculus GN=Nup210 PE=1 SV=1	A0A0R4J1I6	1.205	0.771493
Putative adenosylhomocysteinase 3 OS=Mus musculus GN=Ahcyl2 PE=1 SV=1	Q68FL4	0.921	0.828472
DDB1- and CUL4-associated factor 7 OS=Mus musculus GN=Dcaf7 PE=1 SV=1	P61963	1.507	0.120934
Dual specificity mitogen-activated protein kinase kinase 1 OS=Mus musculus GN=Map2k1 PE=1 SV=2	P31938	1.007	0.990877
Actin-related protein 2/3 complex subunit 4 OS=Mus musculus GN=Arpc4 PE=1 SV=3	P59999	0.973	0.993171
AP-1 complex subunit mu-1 OS=Mus musculus GN=Ap1m1 PE=1 SV=3	P35585	1	0.995649
Glutamine--fructose-6-phosphate aminotransferase [isomerizing] 1 OS=Mus musculus GN=Gfpt1 PE=1 SV=3	P47856	1.137	0.759933
Tubulin-specific chaperone C OS=Mus musculus GN=Tbcc PE=1 SV=1	Q8VCN9	1.066	0.975052
Ubiquitin-conjugating enzyme E2 K OS=Mus musculus GN=Ube2k PE=1 SV=3	P61087	1.032	0.962644
Small G protein signaling modulator 1 OS=Mus musculus GN=Sgsm1 PE=1 SV=2	Q8BPQ7	1.173	0.696315
Striatin OS=Mus musculus GN=Strn PE=1 SV=1	F8WH41	1.059	0.964418
Eukaryotic translation initiation factor 3 subunit I OS=Mus musculus GN=Eif3i PE=1 SV=1	Q9QZD9	1.286	0.46708
LYR motif-containing protein 2 OS=Mus musculus GN=Lyrm2 PE=3 SV=1	Q8R033	0.802	0.346874
Zinc phosphodiesterase ELAC protein 1 OS=Mus musculus GN=Elac1 PE=2 SV=1	Q8VEB6	1.146	0.906717
Syntaxin-1B OS=Mus musculus GN=Stx1b PE=1 SV=1	P61264	0.857	0.55807
Serine/threonine-protein kinase 32C OS=Mus musculus GN=Stk32c PE=1 SV=1	E9PXK4	0.948	0.924066
Glycerophosphodiester phosphodiesterase 1 OS=Mus musculus GN=Gde1 PE=1 SV=1	Q9JL56	1.086	0.919148
AP-3 complex subunit beta-1 OS=Mus musculus GN=Ap3b1 PE=1 SV=2	Q9Z1T1	0.726	0.144999
Peroxiredoxin-5, mitochondrial OS=Mus musculus GN=Prdx5 PE=1 SV=2	P99029	0.891	0.760373
Protein RUFY3 OS=Mus musculus GN=Rufy3 PE=1 SV=1	Q9D394	0.771	0.0946579
V-type proton ATPase subunit B, brain isoform OS=Mus musculus GN=Atp6v1b2 PE=1 SV=1	P62814	1.025	0.962644
Syntaphilin OS=Mus musculus GN=Snph PE=1 SV=3	Q80U23	0.958	0.933578
CD109 antigen OS=Mus musculus GN=Cd109 PE=1 SV=1	Q8R422	1.04	0.990877
Acetyl-CoA carboxylase 1 OS=Mus musculus GN=Acaca PE=1 SV=1	Q5SWU9	0.996	0.995417
RNA polymerase II subunit A C-terminal domain phosphatase SSU72 OS=Mus musculus GN=Ssu72 PE=1 SV=1	Q9CY97	1.247	0.774625
4-trimethylaminobutyraldehyde dehydrogenase OS=Mus musculus GN=Aldh9a1 PE=1 SV=1	Q3U367	1.008	0.98699
Arginyl-tRNA--protein transferase 1 OS=Mus musculus GN=Ate1 PE=1 SV=1	J3QNU1	0.918	0.823942
Microtubule-associated protein RP/EB family member 3 OS=Mus musculus GN=Mapre3 PE=1 SV=1	Q6PER3	1.056	0.888103
STAM-binding protein OS=Mus musculus GN=Stambp PE=1 SV=1	Q9CQ26	1.171	0.851647
Junction plakoglobin OS=Mus musculus GN=Jup PE=1 SV=3	Q02257	0.972	0.940082
Protein tyrosine phosphatase, receptor type, C, isoform CRA_b OS=Mus musculus GN=Ptprc PE=1 SV=1	S4R2V1	0.837	0.483251
Vacuolar protein sorting-associated protein 41 homolog OS=Mus musculus GN=Vps41 PE=1 SV=1	Q5KU39	1.097	0.982014
Tau-tubulin kinase 1 OS=Mus musculus GN=Ttbk1 PE=1 SV=3	Q6PCN3	1.044	0.999281
Phosphatidylinositide phosphatase SAC1 OS=Mus musculus GN=Sacm1l PE=1 SV=1	Q9EP69	1.017	0.96987
Ena/VASP-like protein OS=Mus musculus GN=Evl PE=1 SV=1	E9PVP4	1.009	0.995649
Traf2 and NCK-interacting protein kinase OS=Mus musculus GN=Tnik PE=1 SV=1	E0CZD7	1.062	0.993171
TRIO and F-actin-binding protein OS=Mus musculus GN=Triobp PE=1 SV=1	E9QMQ3
Activin receptor type-1 OS=Mus musculus GN=Acvr1 PE=2 SV=2	P37172	0.909	0.82548
RNA 3'-terminal phosphate cyclase OS=Mus musculus GN=RtcA PE=1 SV=2	Q9D7H3	0.885	0.692395
Major facilitator superfamily domain-containing protein 6 OS=Mus musculus GN=Mfsd6 PE=1 SV=1	D3Z183
DnaJ homolog subfamily B member 12 OS=Mus musculus GN=Dnajb12 PE=1 SV=1	D6RHR9	0.867	0.612283
Cytosolic Fe-S cluster assembly factor NUBP2 OS=Mus musculus GN=Nubp2 PE=1 SV=1	Q9R061	1.138	0.940515
Conserved oligomeric Golgi complex subunit 1 (Fragment) OS=Mus musculus GN=Cog1 PE=1 SV=1	F6V3F1	1.177	0.853568
Protein-glutamine gamma-glutamyltransferase 2 OS=Mus musculus GN=Tgm2 PE=1 SV=4	P21981	0.819	0.47298
Tubulin beta-4A chain OS=Mus musculus GN=Tubb4a PE=1 SV=3	Q9D6F9	1.196	0.277899
Excitatory amino acid transporter 1 OS=Mus musculus GN=Slc1a3 PE=1 SV=2	P56564	1.206	0.298048
FYVE and coiled-coil domain-containing protein 1 OS=Mus musculus GN=Fyco1 PE=1 SV=1	Q8VDC1	0.948	0.912355
Eukaryotic translation initiation factor 4 gamma 2 OS=Mus musculus GN=Eif4g2 PE=1 SV=2	Q62448	0.92	0.818914
MAGUK p55 subfamily member 3 OS=Mus musculus GN=Mpp3 PE=1 SV=1	Q6XE40	1.14	0.888103
Disks large homolog 2 OS=Mus musculus GN=Dlg2 PE=1 SV=2	Q91XM9	1.076	0.949078
Eukaryotic translation initiation factor 4E-binding protein 2 OS=Mus musculus GN=Eif4ebp2 PE=1 SV=1	P70445	1.249	0.883372
Alpha-adducin OS=Mus musculus GN=Add1 PE=1 SV=1	E9Q1K3	0.01	3.34e-15
Glia-derived nexin (Fragment) OS=Mus musculus GN=Serpine2 PE=1 SV=1	A0A087WQM1	0.928	0.821575
Prefoldin subunit 5 OS=Mus musculus GN=Pfdn5 PE=1 SV=1	Q9WU28	0.845	0.45311
Peripheral plasma membrane protein CASK OS=Mus musculus GN=Cask PE=1 SV=2	O70589	0.985	0.990877
Triosephosphate isomerase OS=Mus musculus GN=Tpi1 PE=1 SV=4	P17751	1.007	0.990877
Hepatoma-derived growth factor OS=Mus musculus GN=Hdgf PE=1 SV=2	P51859	0.948	0.940082
Branched-chain-amino-acid aminotransferase OS=Mus musculus GN=Bcat2 PE=1 SV=1	A0A1B0GX27	0.92	0.813609
Charged multivesicular body protein 1b-1 OS=Mus musculus GN=Chmp1b1 PE=1 SV=1	Q99LU0	0.723	0.0650926
RNA-binding protein 39 OS=Mus musculus GN=Rbm39 PE=1 SV=2	Q8VH51	1.024	0.990877
Potassium voltage-gated channel, shaker-related subfamily, beta member 3 OS=Mus musculus GN=Kcnab3 PE=1 SV=1	Q8VD73	1.127	0.90625
1-acyl-sn-glycerol-3-phosphate acyltransferase gamma OS=Mus musculus GN=Agpat3 PE=1 SV=2	Q9D517	0.926	0.858017
7-dehydrocholesterol reductase OS=Mus musculus GN=Dhcr7 PE=1 SV=1	A0A140LIT2
Gap junction beta-1 protein OS=Mus musculus GN=Gjb1 PE=1 SV=3	P28230
High mobility group protein B1 OS=Mus musculus GN=Hmgb1 PE=1 SV=2	P63158	1.004	0.990877
Tetratricopeptide repeat protein 9A OS=Mus musculus GN=Ttc9 PE=1 SV=1	Q3V038	0.98	0.985524
Aly/REF export factor 2 OS=Mus musculus GN=Alyref2 PE=1 SV=1	Q9JJW6	1.188	0.78716
Protein FAM45A OS=Mus musculus GN=Fam45a PE=1 SV=1	Q3TH34	0.954	0.927878
S-formylglutathione hydrolase OS=Mus musculus GN=Esd PE=1 SV=1	Q9R0P3	0.913	0.850106
Brain-specific angiogenesis inhibitor 1-associated protein 2 OS=Mus musculus GN=Baiap2 PE=1 SV=1	B1AZ46	1.052	0.997319
Diacylglycerol kinase OS=Mus musculus GN=Dgkg PE=1 SV=1	Q8C413
Bcl2-associated agonist of cell death OS=Mus musculus GN=Bad PE=1 SV=1	Q61337	100	3.34e-15
Voltage-dependent calcium channel beta subunit-associated regulatory protein OS=Mus musculus GN=Cbarp PE=1 SV=2	E9PW07	0.979	0.964418
Ubiquitin-conjugating enzyme E2 G1 OS=Mus musculus GN=Ube2g1 PE=1 SV=3	P62254	1.106	0.940541
Putative peptidyl-tRNA hydrolase PTRHD1 OS=Mus musculus GN=Ptrhd1 PE=1 SV=1	D3Z4S3	1.004	0.993171
Putative lipoyltransferase 2, mitochondrial OS=Mus musculus GN=Lipt2 PE=1 SV=2	Q9D009	1.225	0.870892
TGF-beta-activated kinase 1 and MAP3K7-binding protein 3 OS=Mus musculus GN=Tab3 PE=1 SV=2	Q571K4
Protein enabled homolog OS=Mus musculus GN=Enah PE=1 SV=1	A0A0A6YW06	1.065	0.913694
HRAS-like suppressor 3 OS=Mus musculus GN=Pla2g16 PE=1 SV=2	Q8R3U1	1.188	0.605751
Developmentally-regulated GTP-binding protein 1 OS=Mus musculus GN=Drg1 PE=1 SV=1	P32233
Latexin OS=Mus musculus GN=Lxn PE=1 SV=2	P70202	0.945	0.956508
DnaJ homolog subfamily C member 2 OS=Mus musculus GN=Dnajc2 PE=1 SV=1	E9Q9H3	1.362	0.419442
Prenylcysteine oxidase-like OS=Mus musculus GN=Pcyox1l PE=1 SV=1	Q8C7K6	0.934	0.888103
Protein lunapark OS=Mus musculus GN=Lnp PE=1 SV=1	Q7TQ95	1.154	0.802779
Protein FAM49B OS=Mus musculus GN=Fam49b PE=1 SV=1	Q921M7	0.972	0.993171
Sulfite oxidase, mitochondrial OS=Mus musculus GN=Suox PE=1 SV=2	Q8R086	1.08	0.84284
SH3 and multiple ankyrin repeat domains protein 1 OS=Mus musculus GN=Shank1 PE=1 SV=1	D3YZU4	1.41	0.307991
Serum deprivation-response protein OS=Mus musculus GN=Sdpr PE=1 SV=3	Q63918
3-hydroxybutyrate dehydrogenase type 2 OS=Mus musculus GN=Bdh2 PE=1 SV=1	Q8JZV9	1.006	0.993171
Vacuolar protein sorting-associated protein 51 homolog OS=Mus musculus GN=Vps51 PE=1 SV=2	Q3UVL4	1.097	0.81171
Thioredoxin-related transmembrane protein 1 (Fragment) OS=Mus musculus GN=Tmx1 PE=1 SV=1	F6V084	0.822	0.307991
Phosducin-like protein 3 OS=Mus musculus GN=Pdcl3 PE=1 SV=1	Q8BVF2
Tripeptidyl-peptidase 2 OS=Mus musculus GN=Tpp2 PE=1 SV=3	Q64514	0.951	0.962697
Tubulin--tyrosine ligase OS=Mus musculus GN=Ttl PE=1 SV=2	P38585	1.016	0.998835
Ras-related protein Rab-11A OS=Mus musculus GN=Rab11a PE=1 SV=3	P62492	1.196	0.663263
SUZ domain-containing protein 1 (Fragment) OS=Mus musculus GN=Szrd1 PE=1 SV=1	A2AA85	0.998	0.990877
ADP-ribosyl cyclase/cyclic ADP-ribose hydrolase 1 OS=Mus musculus GN=Cd38 PE=1 SV=2	P56528	1.133	0.924462
Dehydrogenase/reductase SDR family member 7 OS=Mus musculus GN=Dhrs7 PE=1 SV=2	Q9CXR1	0.885	0.627794
Disks large-associated protein 4 OS=Mus musculus GN=Dlgap4 PE=1 SV=1	I1E4X0	1.029	0.998835
General transcription factor II-I (Fragment) OS=Mus musculus GN=Gtf2i PE=1 SV=2	G3UYJ6
Alpha globin 1 OS=Mus musculus GN=haemaglobin alpha 1 PE=1 SV=1	Q91VB8	1.342	0.0118728
GATS-like protein 3 OS=Mus musculus GN=Gatsl3 PE=2 SV=1	Q9CWQ8	1.049	0.998835
Heat shock protein beta-6 OS=Mus musculus GN=Hspb6 PE=1 SV=1	Q5EBG6	1.114	0.863791
Alpha-adducin OS=Mus musculus GN=Add1 PE=1 SV=2	Q9QYC0	0.958	0.96987
Neuroblastoma-amplified sequence OS=Mus musculus GN=Nbas PE=1 SV=1	E9Q411	0.961	0.942263
Annexin OS=Mus musculus GN=Anxa6 PE=1 SV=1	F8WIT2	0.987	0.99918
Peroxisomal targeting signal 2 receptor OS=Mus musculus GN=Pex7 PE=1 SV=1	P97865	1.154	0.913075
Integrin beta OS=Mus musculus GN=Itgb5 PE=1 SV=1	G5E8F8	0.826	0.460694
Calcium/calmodulin-dependent protein kinase IV OS=Mus musculus GN=Camk4 PE=1 SV=1	Q8BGR3	1.182	0.819804
Tetratricopeptide repeat protein 7B OS=Mus musculus GN=Ttc7b PE=1 SV=1	E9Q6P5	1.086	0.917841
BLOC-1-related complex subunit 6 OS=Mus musculus GN=Borcs6 PE=1 SV=1	Q9D6W8	1.1	0.941623
SLIT and NTRK-like protein 1 OS=Mus musculus GN=Slitrk1 PE=2 SV=1	Q810C1	1.042	0.99918
Protein NipSnap homolog 3B OS=Mus musculus GN=Nipsnap3b PE=1 SV=1	B1AWZ5	1.014	0.991659
Receptor activity-modifying protein 1 OS=Mus musculus GN=Ramp1 PE=4 SV=1	A0A087WPC6	0.821	0.530169
Phospholipid-transporting ATPase OS=Mus musculus GN=Atp9a PE=1 SV=1	Q8C288	1.122	0.90853
Density-regulated protein OS=Mus musculus GN=Denr PE=1 SV=1	Q9CQJ6	0.919	0.84883
Vacuolar protein sorting-associated protein 35 OS=Mus musculus GN=Vps35 PE=1 SV=1	Q9EQH3	1.025	0.962644
Secernin-2 OS=Mus musculus GN=Scrn2 PE=1 SV=1	Q8VCA8	1.207	0.656639
Late secretory pathway protein AVL9 homolog OS=Mus musculus GN=Avl9 PE=1 SV=2	Q80U56	1.093	0.81171
LIM and calponin homology domains-containing protein 1 OS=Mus musculus GN=Limch1 PE=1 SV=2	D3Z589	1.204	0.774625
Nucleobindin-2 OS=Mus musculus GN=Nucb2 PE=1 SV=2	P81117	1.017	0.998835
Golgi apparatus protein 1 (Fragment) OS=Mus musculus GN=Glg1 PE=1 SV=1	F8WHM5	1.077	0.928202
V-type proton ATPase catalytic subunit A OS=Mus musculus GN=Atp6v1a PE=1 SV=2	P50516	0.996	0.995649
Eukaryotic translation initiation factor 1 OS=Mus musculus GN=Eif1 PE=1 SV=2	P48024	1.153	0.895214
BUB3-interacting and GLEBS motif-containing protein ZNF207 OS=Mus musculus GN=Znf207 PE=1 SV=1	Q9JMD0	1.228	0.833811
Apoptosis regulator BAX OS=Mus musculus GN=Bax PE=1 SV=1	Q07813	1.074	0.990877
Arf-GAP with GTPase, ANK repeat and PH domain-containing protein 1 OS=Mus musculus GN=Agap1 PE=1 SV=1	Q8BXK8	0.943	0.888103
Carboxypeptidase D OS=Mus musculus GN=Cpd PE=1 SV=2	O89001	1.141	0.861588
Golgi to ER traffic protein 4 homolog OS=Mus musculus GN=Get4 PE=1 SV=2	Q9D1H7	1.064	0.962644
Cyclin-G-associated kinase OS=Mus musculus GN=Gak PE=1 SV=2	Q99KY4	1.038	0.998835
Serine (Or cysteine) peptidase inhibitor, clade A, member 3N, isoform CRA_a OS=Mus musculus GN=Serpina3n PE=1 SV=1	G3X8T9	0.901	0.747094
Calcium/calmodulin-dependent protein kinase II inhibitor 2 OS=Mus musculus GN=Camk2n2 PE=1 SV=1	Q78WH7
Dystroglycan OS=Mus musculus GN=Dag1 PE=1 SV=4	Q62165	1.136	0.70877
E3 ubiquitin-protein ligase UBR2 OS=Mus musculus GN=Ubr2 PE=1 SV=2	Q6WKZ8	0.944	0.908616
Pantothenate kinase 2 OS=Mus musculus GN=Pank2 PE=1 SV=1	Q3U4S0	1.23	0.629625
Crk-like protein OS=Mus musculus GN=Crkl PE=1 SV=2	P47941	1.041	0.975727
RIKEN cDNA 2610301B20 gene OS=Mus musculus GN=2610301B20Rik PE=1 SV=1	B1AV75	0.98	0.964418
Nuclear receptor-binding protein OS=Mus musculus GN=Nrbp1 PE=1 SV=1	D3YUV1	0.955	0.911321
Nucleobindin-1 OS=Mus musculus GN=Nucb1 PE=1 SV=2	Q02819	1.029	0.964418
Ras-related protein Rab-28 OS=Mus musculus GN=Rab28 PE=1 SV=1	Q99KL7	0.971	0.96113
Cytoskeleton-associated protein 5 OS=Mus musculus GN=Ckap5 PE=1 SV=1	A2AGT5	0.95	0.949078
RAC-gamma serine/threonine-protein kinase OS=Mus musculus GN=Akt3 PE=1 SV=1	Q9WUA6	0.875	0.666411
Ribosomal protein S6 kinase alpha-2 OS=Mus musculus GN=Rps6ka2 PE=1 SV=1	Q9WUT3	0.94	0.8982
WD repeat-containing protein 5 OS=Mus musculus GN=Wdr5 PE=1 SV=1	P61965	1.277	0.769081
Translation initiation factor eIF-2B subunit epsilon OS=Mus musculus GN=Eif2b5 PE=1 SV=1	Q8CHW4	1.027	0.998835
Probable ubiquitin carboxyl-terminal hydrolase FAF-X OS=Mus musculus GN=Usp9x PE=1 SV=1	Q4FE56	1.159	0.60913
Myotrophin OS=Mus musculus GN=Mtpn PE=1 SV=2	P62774	0.874	0.659782
Ectonucleotide pyrophosphatase/phosphodiesterase family member 6 OS=Mus musculus GN=Enpp6 PE=1 SV=1	Q8BGN3	1.117	0.956508
Protein cereblon OS=Mus musculus GN=Crbn PE=1 SV=1	Q8C7D2	1.24	0.829459
Protein phosphatase 1 regulatory subunit 3F OS=Mus musculus GN=Ppp1r3f PE=1 SV=3	Q9JIG4	1.099	0.955207
Ribonuclease inhibitor OS=Mus musculus GN=Rnh1 PE=1 SV=1	A0A1B0GSG5	1.023	0.964418
Neurofilament medium polypeptide OS=Mus musculus GN=Nefm PE=1 SV=4	P08553	0.664	0.000200695
MAGUK p55 subfamily member 6 OS=Mus musculus GN=Mpp6 PE=1 SV=1	Q9JLB0	1.09	0.77248
Plexin-A1 OS=Mus musculus GN=Plxna1 PE=1 SV=1	P70206	0.962	0.940082
Protein phosphatase 1 regulatory subunit 21 OS=Mus musculus GN=Ppp1r21 PE=1 SV=2	Q3TDD9	1.068	0.959092
Glutathione synthetase OS=Mus musculus GN=Gss PE=1 SV=1	P51855	1.009	0.990877
Solute carrier family 2, facilitated glucose transporter member 3 OS=Mus musculus GN=Slc2a3 PE=1 SV=1	P32037	0.977	0.990877
Ankyrin repeat domain-containing protein 13A OS=Mus musculus GN=Ankrd13a PE=1 SV=2	Q80UP5	1.058	0.990877
DOMON domain-containing protein FRRS1L (Fragment) OS=Mus musculus GN=Frrs1l PE=1 SV=1	F6Q3S1	1.318	0.670483
Sortilin-related receptor OS=Mus musculus GN=Sorl1 PE=1 SV=3	O88307	1.021	0.998835
Dynamin-3 OS=Mus musculus GN=Dnm3 PE=1 SV=1	E9QLL2	1.109	0.675119
Fasciculation and elongation protein zeta-1 OS=Mus musculus GN=Fez1 PE=1 SV=2	Q8K0X8	0.942	0.904674
Carnitine O-palmitoyltransferase 1, brain isoform (Fragment) OS=Mus musculus GN=Cpt1c PE=1 SV=1	A0A1D5RLH1	1.219	0.753812
Armadillo repeat-containing protein 6 OS=Mus musculus GN=Armc6 PE=1 SV=1	Q8BNU0	0.994	0.979694
Protein rogdi homolog OS=Mus musculus GN=Rogdi PE=1 SV=2	Q3TDK6	1.189	0.479732
SRC kinase-signaling inhibitor 1 OS=Mus musculus GN=Srcin1 PE=1 SV=1	B1AQX6	1.108	0.964418
Fibroblast growth factor 12 OS=Mus musculus GN=Fgf12 PE=1 SV=1	P61329	1.081	0.82656
Bifunctional coenzyme A synthase OS=Mus musculus GN=Coasy PE=1 SV=2	Q9DBL7	0.979	0.990877
Cell cycle and apoptosis regulator protein 2 OS=Mus musculus GN=Ccar2 PE=1 SV=2	Q8VDP4	1.033	0.998835
Peptidyl-prolyl cis-trans isomerase FKBP1B OS=Mus musculus GN=Fkbp1b PE=1 SV=3	Q9Z2I2	0.995	0.988349
Calcium/calmodulin-dependent protein kinase II, beta, isoform CRA_b OS=Mus musculus GN=Camk2b PE=1 SV=1	Q5SVJ0	1.206	0.205581
Dedicator of cytokinesis protein 7 OS=Mus musculus GN=Dock7 PE=1 SV=2	A2A9M4	0.644	0.0176643
Spermidine synthase OS=Mus musculus GN=Srm PE=1 SV=1	Q64674	1.048	0.906717
U1 small nuclear ribonucleoprotein 70 kDa OS=Mus musculus GN=Snrnp70 PE=1 SV=2	Q62376	0.892	0.690446
FERM, RhoGEF and pleckstrin domain-containing protein 1 OS=Mus musculus GN=Farp1 PE=1 SV=1	F8VPU2	1.076	0.993171
Non-lysosomal glucosylceramidase OS=Mus musculus GN=Gba2 PE=1 SV=2	Q69ZF3	1.063	0.990877
Cytosolic 5'-nucleotidase 3A OS=Mus musculus GN=Nt5c3a PE=1 SV=4	Q9D020	0.884	0.6661
Small nuclear ribonucleoprotein Sm D2 OS=Mus musculus GN=Snrpd2 PE=1 SV=1	P62317	1.23	0.45978
Fumarylacetoacetase OS=Mus musculus GN=Fah PE=1 SV=2	P35505	1.068	0.848484
Plastin-3 (Fragment) OS=Mus musculus GN=Pls3 PE=1 SV=1	A0A1C7CYV0	0.971	0.986163
Vesicle-associated membrane protein-associated protein B OS=Mus musculus GN=Vapb PE=1 SV=3	Q9QY76	0.842	0.427932
Malonyl-CoA decarboxylase, mitochondrial OS=Mus musculus GN=Mlycd PE=1 SV=1	Q99J39	1.093	0.905053
Methionine synthase OS=Mus musculus GN=Mtr PE=1 SV=1	A6H5Y3	1.064	0.990877
Phosphatidylinositol 4-kinase alpha OS=Mus musculus GN=Pi4ka PE=1 SV=2	E9Q3L2	1.039	0.949924
Band 4.1-like protein 2 OS=Mus musculus GN=Epb41l2 PE=1 SV=2	O70318	1.047	0.908616
Flavin reductase (NADPH) OS=Mus musculus GN=Blvrb PE=1 SV=3	Q923D2	1.073	0.813565
Abscission/NoCut checkpoint regulator OS=Mus musculus GN=Zfyve19 PE=1 SV=1	Q4KL52	0.927	0.84284
Tetraspanin-7 OS=Mus musculus GN=Tspan7 PE=1 SV=2	Q62283	1.052	0.990877
Ribosome-releasing factor 2, mitochondrial OS=Mus musculus GN=Gfm2 PE=1 SV=2	Q8R2Q4	1.276	0.784937
CUE domain-containing protein 2 OS=Mus musculus GN=Cuedc2 PE=1 SV=1	Q9CXX9	0.872	0.660599
Heat shock 70 kDa protein 14 OS=Mus musculus GN=Hspa14 PE=1 SV=2	Q99M31	1.003	0.982014
Ceruloplasmin OS=Mus musculus GN=Cp PE=1 SV=1	G3X8Q5	1.296	0.0606156
Collagen, type VI, alpha 3 OS=Mus musculus GN=Col6a3 PE=1 SV=1	A0A087WS16	0.94	0.884382
Prohibitin OS=Mus musculus GN=Phb PE=1 SV=1	P67778	0.934	0.860744
Sequestosome-1 OS=Mus musculus GN=Sqstm1 PE=1 SV=1	D3YZJ1	0.857	0.629625
DnaJ homolog subfamily A member 1 OS=Mus musculus GN=Dnaja1 PE=1 SV=1	P63037	1.018	0.998835
Uncharacterized protein C17orf62 homolog OS=Mus musculus PE=1 SV=2	Q3TYS2	1.371	0.559996
Cullin-4B OS=Mus musculus GN=Cul4b PE=1 SV=1	A2A432	0.951	0.941623
CapZ-interacting protein OS=Mus musculus GN=Rcsd1 PE=1 SV=1	Q3UZA1	1.161	0.884443
Protachykinin-1 OS=Mus musculus GN=Tac1 PE=1 SV=1	A0A0A0MQA8	1.174	0.848541
Protein furry homolog OS=Mus musculus GN=Fry PE=1 SV=1	E9Q8I9	1.038	0.998835
Solute carrier family 2, facilitated glucose transporter member 1 OS=Mus musculus GN=Slc2a1 PE=1 SV=4	P17809	0.706	0.0072468
Inosine triphosphate pyrophosphatase OS=Mus musculus GN=Itpa PE=1 SV=2	Q9D892	1.082	0.787111
Transmembrane and ubiquitin-like domain-containing protein 1 OS=Mus musculus GN=Tmub1 PE=1 SV=1	E9QN77	0.722	0.143711
Interleukin-9 OS=Mus musculus GN=Il9 PE=1 SV=1	P15247	0.864	0.627794
Transcription factor p65 OS=Mus musculus GN=Rela PE=1 SV=1	Q04207	1.056	0.993171
Pterin-4-alpha-carbinolamine dehydratase 2 OS=Mus musculus GN=Pcbd2 PE=1 SV=1	A0A0R4J1R7	0.96	0.962644
N-acetylglucosamine-6-phosphate deacetylase OS=Mus musculus GN=Amdhd2 PE=1 SV=1	Q8JZV7	1.141	0.834133
MCG15151 OS=Mus musculus GN=Gm6812 PE=4 SV=1	B1AXU1	0.907	0.81171
Huntingtin-interacting protein 1-related protein OS=Mus musculus GN=Hip1r PE=1 SV=2	Q9JKY5	1.087	0.81171
Threonine--tRNA ligase, cytoplasmic OS=Mus musculus GN=Tars PE=1 SV=2	Q9D0R2	0.999	0.99918
Ras-related protein Rab-14 OS=Mus musculus GN=Rab14 PE=1 SV=3	Q91V41	1.127	0.606391
2-hydroxyacyl-CoA lyase 1 OS=Mus musculus GN=Hacl1 PE=1 SV=2	Q9QXE0	1.157	0.875018
Protein tweety homolog 2 OS=Mus musculus GN=Ttyh2 PE=1 SV=1	Q3TH73	0.937	0.873471
Maleylacetoacetate isomerase OS=Mus musculus GN=Gstz1 PE=1 SV=1	Q9WVL0	0.989	0.994525
Gamma-aminobutyric acid receptor-associated protein-like 2 OS=Mus musculus GN=Gabarapl2 PE=1 SV=1	P60521	0.819	0.298048
Potassium/sodium hyperpolarization-activated cyclic nucleotide-gated channel 1 OS=Mus musculus GN=Hcn1 PE=1 SV=1	O88704	0.904	0.76572
MOB kinase activator 2 OS=Mus musculus GN=Mob2 PE=1 SV=1	A0A1B0GR18	1.092	0.957238
Serine/threonine-protein kinase SIK3 OS=Mus musculus GN=Sik3 PE=1 SV=1	E9PU87	1.077	0.90853
Probable G-protein coupled receptor 158 OS=Mus musculus GN=Gpr158 PE=1 SV=2	Q8C419	0.854	0.593198
Disks large homolog 1 OS=Mus musculus GN=Dlg1 PE=1 SV=1	H7BWY4	1.01	0.993171
Transmembrane protein 65 OS=Mus musculus GN=Tmem65 PE=1 SV=1	Q4VAE3	0.987	0.994525
Autophagy protein 5 OS=Mus musculus GN=Atg5 PE=1 SV=1	Q99J83	1.157	0.888103
Heterogeneous nuclear ribonucleoprotein A1 OS=Mus musculus GN=Hnrnpa1 PE=1 SV=2	P49312	1.049	0.908893
Tyrosine-protein kinase Yes OS=Mus musculus GN=Yes1 PE=1 SV=3	Q04736	1.254	0.568627
Junctional adhesion molecule A OS=Mus musculus GN=F11r PE=1 SV=2	O88792	1.147	0.895214
Lysophosphatidylcholine acyltransferase 1 OS=Mus musculus GN=Lpcat1 PE=1 SV=1	Q3TFD2	1.216	0.770804
Putative uncharacterized protein OS=Mus musculus GN=Stx7 PE=1 SV=1	Q8BH40	0.946	0.919751
COP9 signalosome complex subunit 4 OS=Mus musculus GN=Cops4 PE=1 SV=1	O88544	0.978	0.993171
Sarcolemmal membrane-associated protein OS=Mus musculus GN=Slmap PE=1 SV=1	H7BX64	1.074	0.964418
TBC1 domain family member 15 OS=Mus musculus GN=Tbc1d15 PE=1 SV=1	Q9CXF4	1.002	0.992059
Tumor susceptibility gene 101 protein OS=Mus musculus GN=Tsg101 PE=1 SV=2	Q61187	1.109	0.904753
Set1/Ash2 histone methyltransferase complex subunit ASH2 OS=Mus musculus GN=Ash2l PE=1 SV=1	E9PU93	0.966	0.935071
Protein piccolo OS=Mus musculus GN=Pclo PE=1 SV=4	Q9QYX7	1.218	0.159372
Transmembrane protein 163 OS=Mus musculus GN=Tmem163 PE=1 SV=1	Q8C996	1.021	0.993171
Unconventional myosin-VI OS=Mus musculus GN=Myo6 PE=1 SV=1	E9Q175	0.894	0.680199
Synaptobrevin homolog YKT6 OS=Mus musculus GN=Ykt6 PE=1 SV=1	Q9CQW1	0.924	0.850106
Formin-like 1, isoform CRA_c OS=Mus musculus GN=Fmnl1 PE=1 SV=1	A2AB60	1.083	0.982014
Ubiquitin carboxyl-terminal hydrolase 15 OS=Mus musculus GN=Usp15 PE=1 SV=1	Q8R5H1	0.545	5.54897e-06
Acyl-coenzyme A thioesterase 1 OS=Mus musculus GN=Acot1 PE=1 SV=1	O55137	1.116	0.871724
Sister chromatid cohesion protein PDS5 homolog B OS=Mus musculus GN=Pds5b PE=1 SV=1	F8WHU5	1.265	0.649056
BAG family molecular chaperone regulator 3 OS=Mus musculus GN=Bag3 PE=1 SV=2	Q9JLV1	0.949	0.911362
Stress-induced-phosphoprotein 1 OS=Mus musculus GN=Stip1 PE=1 SV=1	Q60864	0.984	0.998835
Endophilin-B1 OS=Mus musculus GN=Sh3glb1 PE=1 SV=1	Q9JK48	0.992	0.998835
Polyadenylate-binding protein-interacting protein 1 OS=Mus musculus GN=Paip1 PE=1 SV=1	G3UYE5	0.797	0.208206
Serine/threonine-protein kinase LMTK1 OS=Mus musculus GN=Aatk PE=1 SV=1	B1AZF3	1.368	0.393122
BRCA1-associated protein OS=Mus musculus GN=Brap PE=1 SV=1	Q99MP8	1.037	0.998835
Proteolipid protein 2 OS=Mus musculus GN=Plp2 PE=1 SV=1	Q9R1Q7	0.863	0.672957
Protein FAM136A OS=Mus musculus GN=Fam136a PE=1 SV=1	Q9CR98	0.799	0.181795
Ephrin-B3 OS=Mus musculus GN=Efnb3 PE=1 SV=1	O35393	1.124	0.760435
Protein FAM210A OS=Mus musculus GN=Fam210a PE=1 SV=1	Q8BGY7	1.053	0.998835
Tetratricopeptide repeat protein 39B OS=Mus musculus GN=Ttc39b PE=1 SV=1	Q8BYY4	0.992	0.982014
Tensin 1 (Fragment) OS=Mus musculus GN=Tns1 PE=1 SV=1	A0A087WQ94	0.947	0.933735
AP-2 complex subunit mu OS=Mus musculus GN=Ap2m1 PE=1 SV=1	P84091	0.97	0.990877
Inositol (Myo)-1(Or 4)-monophosphatase 1 OS=Mus musculus GN=Impa1 PE=1 SV=1	Q924B0	1.024	0.962697
Nuclear pore glycoprotein p62 OS=Mus musculus GN=Nup62 PE=1 SV=2	Q63850	1.254	0.770804
Phytanoyl-CoA dioxygenase domain-containing protein 1 OS=Mus musculus GN=Phyhd1 PE=1 SV=1	A0A0R4J137	1.029	0.998835
Myelin expression factor 2 OS=Mus musculus GN=Myef2 PE=1 SV=2	A2ATP6	0.933	0.888103
KDEL (Lys-Asp-Glu-Leu) containing 2, isoform CRA_b OS=Mus musculus GN=Kdelc2 PE=1 SV=1	G5E897	0.767	0.166626
Phospholipase A-2-activating protein OS=Mus musculus GN=Plaa PE=1 SV=4	P27612	1.034	0.947622
Heterogeneous nuclear ribonucleoprotein U-like protein 2 OS=Mus musculus GN=Hnrnpul2 PE=1 SV=2	Q00PI9	1.022	0.998835
Kinesin light chain 2 OS=Mus musculus GN=Klc2 PE=1 SV=1	D3YXZ3	1.004	0.994525
Isocitrate dehydrogenase [NADP] cytoplasmic OS=Mus musculus GN=Idh1 PE=1 SV=2	O88844	0.93	0.907381
Tissue factor OS=Mus musculus GN=F3 PE=1 SV=2	P20352	1.06	0.993171
Platelet-activating factor acetylhydrolase IB subunit alpha OS=Mus musculus GN=Pafah1b1 PE=1 SV=2	P63005	1.018	0.96987
U1 small nuclear ribonucleoprotein C OS=Mus musculus GN=Snrpc PE=1 SV=1	Q62241	1.057	0.990877
Islet cell autoantigen 1 OS=Mus musculus GN=Ica1 PE=1 SV=1	D3Z118
1-phosphatidylinositol 4,5-bisphosphate phosphodiesterase delta-4 OS=Mus musculus GN=Plcd4 PE=1 SV=2	Q8K3R3	1.752	0.0948809
5-phosphohydroxy-L-lysine phospho-lyase OS=Mus musculus GN=Phykpl PE=1 SV=1	Q8R1K4	1.363	0.45978
Elongation factor 1-alpha 1 OS=Mus musculus GN=Eef1a1 PE=1 SV=3	P10126	0.835	0.41473
DNA-directed RNA polymerase II subunit GRINL1A OS=Mus musculus GN=Polr2m PE=2 SV=2	Q6P6I6	0.784	0.369797
Serine/threonine-protein kinase MRCK beta OS=Mus musculus GN=Cdc42bpb PE=1 SV=2	Q7TT50	1.118	0.904013
High mobility group protein HMG-I/HMG-Y OS=Mus musculus GN=Hmga1 PE=1 SV=4	P17095
Putative uncharacterized protein OS=Mus musculus GN=Tmcc2 PE=1 SV=1	Q3TZY4	1.314	0.468058
Neuroendocrine protein 7B2 OS=Mus musculus GN=Scg5 PE=1 SV=1	P12961	1.067	0.964418
Numb-like protein OS=Mus musculus GN=Numbl PE=1 SV=3	O08919	1.137	0.882645
Cytoplasmic phosphatidylinositol transfer protein 1 OS=Mus musculus GN=Pitpnc1 PE=1 SV=1	Q8K4R4	0.977	0.986163
Coiled-coil domain-containing protein 22 OS=Mus musculus GN=Ccdc22 PE=1 SV=1	Q9JIG7	1.174	0.64318
Transcription elongation factor A protein 1 OS=Mus musculus GN=Tcea1 PE=1 SV=1	E9PYD5	1.04	0.990877
RIKEN cDNA C530008M17 gene OS=Mus musculus GN=C530008M17Rik PE=1 SV=1	E9Q3Y7	0.799	0.447692
Metaxin-1 (Fragment) OS=Mus musculus GN=Mtx1 PE=1 SV=1	G3XA66	1.14	0.696315
CDNA sequence BC037034 OS=Mus musculus GN=BC037034 PE=4 SV=1	E9Q6X8	1.092	0.979275
Myosin light chain kinase, smooth muscle OS=Mus musculus GN=Mylk PE=1 SV=3	Q6PDN3	1.022	0.998835
Acetyl-coenzyme A synthetase, cytoplasmic OS=Mus musculus GN=Acss2 PE=1 SV=1	A2AQN4	1.169	0.623524
Protein shisa-4 OS=Mus musculus GN=Shisa4 PE=1 SV=1	Q8CA71	1.202	0.642095
DDRGK domain-containing protein 1 OS=Mus musculus GN=Ddrgk1 PE=1 SV=2	Q80WW9	1.095	0.980765
Guanine nucleotide-binding protein G(I)/G(S)/G(O) subunit gamma-2 OS=Mus musculus GN=Gng2 PE=1 SV=2	P63213	0.966	0.964418
Tenascin-R OS=Mus musculus GN=Tnr PE=1 SV=2	Q8BYI9	1.033	0.949078
G-protein coupled receptor family C group 5 member B OS=Mus musculus GN=Gprc5b PE=1 SV=1	Q923Z0	1.025	0.999445
Intersectin-1 OS=Mus musculus GN=Itsn1 PE=1 SV=1	E9Q0N0	1.038	0.949924
Protein S100-A11 OS=Mus musculus GN=S100a11 PE=1 SV=1	P50543	0.782	0.121348
Alpha2-chimerin OS=Mus musculus GN=Chn1 PE=1 SV=1	A7VK13	1.094	0.995649
Ankyrin repeat domain-containing protein 13D OS=Mus musculus GN=Ankrd13d PE=1 SV=2	Q6PD24	1.166	0.883372
Tropomodulin 2, isoform CRA_c OS=Mus musculus GN=Tmod2 PE=1 SV=1	A0A1L1SU70	1.286	0.559579
Leucine rich repeat containing 40, isoform CRA_a OS=Mus musculus GN=Lrrc40 PE=1 SV=1	A0A0R4J0W6	1.043	0.993171
Myotubularin-related protein 1 (Fragment) OS=Mus musculus GN=Mtmr1 PE=1 SV=1	I7HPV7	1.026	0.971469
Glutathione S-transferase theta-1 OS=Mus musculus GN=Gstt1 PE=1 SV=4	Q64471	0.983	0.990877
Protein disulfide-isomerase A4 OS=Mus musculus GN=Pdia4 PE=1 SV=1	A0A0R4J0Z1	0.939	0.937821
Glucosamine-6-phosphate isomerase 1 OS=Mus musculus GN=Gnpda1 PE=1 SV=3	O88958	1.114	0.634891
UPF0729 protein C18orf32 homolog OS=Mus musculus PE=3 SV=1	Q91WE4	0.898	0.768034
Alanyl-tRNA editing protein Aarsd1 OS=Mus musculus GN=Aarsd1 PE=1 SV=2	Q3THG9	1.015	0.995649
Adenylosuccinate synthetase isozyme 2 OS=Mus musculus GN=Adss PE=1 SV=2	P46664	0.989	0.998835
Leukocyte elastase inhibitor B OS=Mus musculus GN=Serpinb1b PE=1 SV=1	Q8VHP7	0.863	0.604812
SAPS domain family, member 2, isoform CRA_a OS=Mus musculus GN=Ppp6r2 PE=1 SV=1	G3X9K4	1.198	0.888103
Protein KIAA0100 OS=Mus musculus GN=Kiaa0100 PE=1 SV=1	Q5SYL3	1.024	0.994525
Vacuolar protein sorting-associated protein 53 homolog OS=Mus musculus GN=Vps53 PE=1 SV=1	E9PXG9	1.004	0.998835
Transforming acidic coiled-coil-containing protein 1 OS=Mus musculus GN=Tacc1 PE=1 SV=1	Q6Y685	1.211	0.649525
Peroxisomal carnitine O-octanoyltransferase OS=Mus musculus GN=Crot PE=1 SV=1	Q9DC50	1.084	0.962697
Malic enzyme OS=Mus musculus GN=Me1 PE=1 SV=1	Q3TQP6	1.006	0.990877
Protein Dr1 OS=Mus musculus GN=Dr1 PE=1 SV=1	Q91WV0	1.105	0.963197
Rap1 GTPase-activating protein 1 OS=Mus musculus GN=Rap1gap PE=1 SV=2	A2ALS5	1.031	0.964418
Cullin-1 OS=Mus musculus GN=Cul1 PE=1 SV=1	Q9WTX6	0.937	0.907591
Carboxypeptidase OS=Mus musculus GN=Ctsa PE=1 SV=1	G3X8T3	1.02	0.993171
Aminoacylase OS=Mus musculus GN=Acy1 PE=1 SV=1	A0A0R4J050	1.021	0.971469
Gamma-adducin OS=Mus musculus GN=Add3 PE=1 SV=2	Q9QYB5	1.067	0.848541
Core-binding factor subunit beta OS=Mus musculus GN=Cbfb PE=1 SV=1	Q08024	1.124	0.8982
Creatine kinase M-type OS=Homo sapiens GN=CKM PE=1 SV=2	P06732	1.099	0.962644
PDZ and LIM domain protein 4 OS=Mus musculus GN=Pdlim4 PE=1 SV=3	P70271	1.219	0.407093
U6 snRNA-associated Sm-like protein LSm6 OS=Mus musculus GN=Lsm6 PE=1 SV=1	P62313	1.121	0.895214
Josephin-2 OS=Mus musculus GN=Josd2 PE=1 SV=1	D3YTZ7	0.944	0.888103
Sprouty-related, EVH1 domain-containing protein 1 OS=Mus musculus GN=Spred1 PE=1 SV=1	Q924S8	1.055	0.994934
Tyrosine-protein phosphatase non-receptor type 11 OS=Mus musculus GN=Ptpn11 PE=1 SV=2	P35235	1.053	0.895214
S100 calcium-binding protein A16 (Fragment) OS=Mus musculus GN=S100a16 PE=1 SV=8	D3Z2Y6	0.941	0.907381
Keratin, type I cytoskeletal 10 OS=Homo sapiens GN=KRT10 PE=1 SV=6	P13645	1.7	3.22059e-10
6-phosphogluconate dehydrogenase, decarboxylating OS=Mus musculus GN=Pgd PE=1 SV=3	Q9DCD0	0.908	0.829078
Trypsin OS=Sus scrofa PE=1 SV=1	P00761	1.068	0.848484
Mannose-6-phosphate isomerase OS=Mus musculus GN=Mpi PE=1 SV=1	Q924M7	0.916	0.81171
26S protease regulatory subunit 8 OS=Mus musculus GN=Psmc5 PE=1 SV=1	Q8K1K2	0.967	0.96987
UPF0687 protein C20orf27 homolog OS=Mus musculus PE=1 SV=3	Q9D1K7	1.003	0.998835
NIF3-like protein 1 OS=Mus musculus GN=Nif3l1 PE=1 SV=4	Q9EQ80	1.085	0.888103
Symplekin OS=Mus musculus GN=Sympk PE=1 SV=1	Q80X82	0.816	0.52406
Tissue alpha-L-fucosidase OS=Mus musculus GN=Fuca1 PE=1 SV=1	Q99LJ1	0.995	0.986828
Complement C1q subcomponent subunit C OS=Mus musculus GN=C1qc PE=1 SV=2	Q02105	1.063	0.959092
Alpha-1-syntrophin OS=Mus musculus GN=Snta1 PE=1 SV=1	A2AKD7	1.032	0.962697
Nitrilase homolog 1 OS=Mus musculus GN=Nit1 PE=1 SV=2	Q8VDK1	1.037	0.964418
Leucine-rich repeat and immunoglobulin-like domain-containing nogo receptor-interacting protein 1 OS=Mus musculus GN=Lingo1 PE=1 SV=1	Q9D1T0	1.065	0.993171
E3 ubiquitin-protein ligase ARIH1 OS=Mus musculus GN=Arih1 PE=1 SV=1	H7BWY7	1.099	0.962644
Eukaryotic translation initiation factor 4B OS=Mus musculus GN=Eif4b PE=1 SV=1	Q8BGD9	1.05	0.906717
DCN1-like protein 2 OS=Mus musculus GN=Dcun1d2 PE=1 SV=3	Q8BZJ7	1.082	0.990877
Zinc transporter 3 OS=Mus musculus GN=Slc30a3 PE=1 SV=1	P97441	1.006	0.982014
Serum paraoxonase/arylesterase 1 OS=Mus musculus GN=Pon1 PE=1 SV=2	P52430	1.669	0.00677805
45 kDa calcium-binding protein OS=Mus musculus GN=Sdf4 PE=1 SV=1	Q61112
Disintegrin and metalloproteinase domain-containing protein 22 OS=Mus musculus GN=Adam22 PE=1 SV=2	Q9R1V6	0.884	0.649525
Geranylgeranyl transferase type-2 subunit alpha OS=Mus musculus GN=Rabggta PE=1 SV=1	Q9JHK4	1.036	0.93659
Histone deacetylase OS=Mus musculus GN=Hdac2 PE=1 SV=1	A0A0R4J008	1.052	0.974607
Angiotensin-converting enzyme OS=Mus musculus GN=Ace PE=1 SV=3	P09470	1.02	0.990877
Galactosylgalactosylxylosylprotein 3-beta-glucuronosyltransferase 3 OS=Mus musculus GN=B3gat3 PE=1 SV=1	P58158	1.047	0.99918
Stomatin-like protein 2, mitochondrial OS=Mus musculus GN=Stoml2 PE=1 SV=1	Q99JB2	0.919	0.813565
Putative uncharacterized protein OS=Mus musculus GN=Rac1 PE=1 SV=1	Q3TLP8	1.045	0.914763
Ribosome-binding protein 1 OS=Mus musculus GN=Rrbp1 PE=1 SV=1	A2AVJ7	0.827	0.360709
RING finger protein 11 OS=Mus musculus GN=Rnf11 PE=1 SV=1	Q9QYK7
Heme oxygenase 1 OS=Mus musculus GN=Hmox1 PE=1 SV=1	P14901
Phosphoribosylformylglycinamidine synthase OS=Mus musculus GN=Pfas PE=1 SV=1	Q5SUR0	1.099	0.884382
RNA polymerase II-associated protein 3 OS=Mus musculus GN=Rpap3 PE=1 SV=1	Q9D706	1.061	0.993742
Alpha-actinin-4 OS=Mus musculus GN=Actn4 PE=1 SV=1	A0A1L1SV25	1.206	0.500495
Fumarylacetoacetate hydrolase domain-containing 2A OS=Mus musculus GN=Fahd2a PE=1 SV=1	A0A0R4J094	1.092	0.737237
EGF-like repeat and discoidin I-like domain-containing protein 3 OS=Mus musculus GN=Edil3 PE=1 SV=2	O35474	1.046	0.993171
Magnesium transporter NIPA1 OS=Mus musculus GN=Nipa1 PE=1 SV=1	Q8BHK1	1.092	0.942263
BRO1 domain-containing protein BROX OS=Mus musculus GN=Brox PE=1 SV=1	Q8K2Q7	0.832	0.443379
Uridine-cytidine kinase-like 1 OS=Mus musculus GN=Uckl1 PE=1 SV=1	Q91YL3	1.132	0.886769
Early endosome antigen 1 OS=Mus musculus GN=Eea1 PE=1 SV=2	Q8BL66	0.959	0.962697
Keratin, type II cytoskeletal 1 OS=Homo sapiens GN=KRT1 PE=1 SV=6	P04264	1.387	0.00318676
Isochorismatase domain-containing protein 2B OS=Mus musculus GN=Isoc2b PE=1 SV=1	Q9DCC7	0.859	0.66854
N-myc-interactor OS=Mus musculus GN=Nmi PE=1 SV=1	O35309	0.959	0.911321
Kinesin-like protein (Fragment) OS=Mus musculus GN=Stard9 PE=3 SV=9	A2AKI2	1.28	0.484151
Protein lifeguard 2 OS=Mus musculus GN=Faim2 PE=2 SV=1	Q8K097	0.838	0.601226
Vigilin OS=Mus musculus GN=Hdlbp PE=1 SV=1	Q8VDJ3	1.052	0.904753
Transmembrane protein 33 OS=Mus musculus GN=Tmem33 PE=1 SV=1	A0A0R4J1Z3	1.141	0.776325
Protein transport protein Sec61 subunit gamma OS=Mus musculus GN=Sec61g PE=3 SV=1	P60060	0.817	0.404583
C-type lectin domain family 2 member L OS=Mus musculus GN=Clec2l PE=1 SV=1	P0C7M9	1.094	0.777793
Shootin-1 OS=Mus musculus GN=Shtn1 PE=1 SV=1	Q8K2Q9	0.927	0.850106
Olfactory receptor OS=Mus musculus GN=Olfr374 PE=3 SV=1	Q7TRY0	0.764	0.177885
Serine/threonine-protein kinase MARK1 OS=Mus musculus GN=Mark1 PE=1 SV=2	Q8VHJ5	1.001	0.991195
Nucleosome assembly protein 1-like 1 OS=Mus musculus GN=Nap1l1 PE=1 SV=2	P28656	0.914	0.84284
Protein transport protein Sec24A OS=Mus musculus GN=Sec24a PE=1 SV=1	Q3U2P1
Lactotransferrin OS=Mus musculus GN=Ltf PE=1 SV=4	P08071	1.601	0.0113841
Monocarboxylate transporter 4 OS=Mus musculus GN=Slc16a3 PE=1 SV=1	P57787	0.88	0.660184
E3 ubiquitin-protein ligase NEDD4 OS=Mus musculus GN=Nedd4 PE=1 SV=3	P46935	1.035	0.994525
CD200 antigen OS=Mus musculus GN=Cd200 PE=1 SV=1	Q80VX2	1.041	0.96987
Syntaxin-18 OS=Mus musculus GN=Stx18 PE=1 SV=2	Q8VDS8	1.052	0.990877
Phosphomevalonate kinase OS=Mus musculus GN=Pmvk PE=1 SV=1	D3YXP6
Amyloid beta (A4)-like protein 1 OS=Mus musculus GN=Aplp1 PE=1 SV=1	A0A0R4IZZ1	1.001	0.992572
Charged multivesicular body protein 3 OS=Mus musculus GN=Chmp3 PE=1 SV=3	Q9CQ10	0.959	0.931015
Rho GDP-dissociation inhibitor 1 OS=Mus musculus GN=Arhgdia PE=1 SV=3	Q99PT1	0.921	0.884317
Dual-specificity mitogen-activated protein kinase kinase 6 OS=Mus musculus GN=Map2k6 PE=1 SV=1	A2AGS2	1.05	0.990877
Probable G-protein coupled receptor 160 OS=Mus musculus GN=Gpr160 PE=2 SV=1	Q3U3F9	0.8	0.177163
Prostamide/prostaglandin F synthase OS=Mus musculus GN=Fam213b PE=1 SV=1	Q9DB60	0.997	0.998835
COMM domain-containing protein 6 OS=Mus musculus GN=Commd6 PE=1 SV=1	Q3V4B5	1.041	0.998835
Stathmin-3 OS=Mus musculus GN=Stmn3 PE=1 SV=1	O70166	1.084	0.964418
Hexokinase-3 OS=Mus musculus GN=Hk3 PE=1 SV=2	Q3TRM8	0.966	0.945707
DNA polymerase nu OS=Mus musculus GN=Poln PE=2 SV=2	Q7TQ07	1.017	0.998835
UPF0449 protein C19orf25 homolog OS=Mus musculus PE=1 SV=1	Q9D7E4	1.268	0.737237
Sodium/potassium-transporting ATPase subunit beta-3 OS=Mus musculus GN=Atp1b3 PE=1 SV=1	P97370	0.933	0.889861
Epimerase family protein SDR39U1 OS=Mus musculus GN=Sdr39u1 PE=1 SV=1	Q5M8N4	1.054	0.911362
Transformation-related protein 53-binding protein 1 OS=Mus musculus GN=Trp53bp1 PE=1 SV=2	A2AU89	0.843	0.508996
MOB kinase activator 1B OS=Mus musculus GN=Mob1b PE=1 SV=3	Q8BPB0	0.819	0.483251
Nesprin-1 OS=Mus musculus GN=Syne1 PE=1 SV=1	A0A1L1STC6
Vesicle transport through interaction with t-SNAREs 1B homolog OS=Mus musculus GN=Vti1b PE=1 SV=1	Q91XH6	0.967	0.928202
Oxysterol-binding protein 1 OS=Mus musculus GN=Osbp PE=1 SV=3	Q3B7Z2	0.974	0.959092
Macrophage migration inhibitory factor OS=Mus musculus GN=Mif PE=1 SV=2	P34884	1.162	0.445473
Casein kinase I isoform delta OS=Mus musculus GN=Csnk1d PE=1 SV=2	Q9DC28	1.018	0.99918
Peptidyl-glycine alpha-amidating monooxygenase OS=Mus musculus GN=Pam PE=1 SV=1	E9Q704	1.004	0.993171
1,4-alpha-glucan-branching enzyme OS=Mus musculus GN=Gbe1 PE=1 SV=1	Q9D6Y9	1.108	0.84284
Aflatoxin B1 aldehyde reductase member 2 OS=Mus musculus GN=Akr7a2 PE=1 SV=3	Q8CG76	0.993	0.998835
Kelch repeat and BTB domain-containing protein 3 OS=Mus musculus GN=Kbtbd3 PE=2 SV=1	Q8BHI4	1.034	0.998835
5'-AMP-activated protein kinase subunit gamma-2 OS=Mus musculus GN=Prkag2 PE=1 SV=1	Q8BIQ9	1.435	0.361028
Cold shock domain-containing protein C2 OS=Mus musculus GN=Csdc2 PE=1 SV=2	Q91YQ3	0.843	0.46708
Splicing factor U2AF 65 kDa subunit OS=Mus musculus GN=U2af2 PE=1 SV=3	P26369	1.073	0.949945
N(G),N(G)-dimethylarginine dimethylaminohydrolase 1 OS=Mus musculus GN=Ddah1 PE=1 SV=3	Q9CWS0	0.943	0.948755
Aspartate aminotransferase, cytoplasmic OS=Mus musculus GN=Got1 PE=1 SV=3	P05201	1.029	0.956802
Myelin P2 protein OS=Mus musculus GN=Pmp2 PE=2 SV=2	P24526	6.481	3.34e-15
Cationic amino acid transporter 2 OS=Mus musculus GN=Slc7a2 PE=1 SV=1	E9QJY0	1.081	0.907566
Transmembrane emp24 domain-containing protein 2 (Fragment) OS=Mus musculus GN=Tmed2 PE=1 SV=1	F6V6T4	1.071	0.913989
Haptoglobin OS=Mus musculus GN=Hp PE=1 SV=1	Q61646	1.918	3.34e-15
Actin-related protein 3B OS=Mus musculus GN=Actr3b PE=1 SV=1	Q641P0	1.148	0.78716
Rho-associated protein kinase 1 OS=Mus musculus GN=Rock1 PE=1 SV=1	P70335	0.945	0.907381
N-acetyl-D-glucosamine kinase OS=Mus musculus GN=Nagk PE=1 SV=3	Q9QZ08	1.189	0.684745
Elongation factor G, mitochondrial OS=Mus musculus GN=Gfm1 PE=1 SV=1	Q8K0D5	1.186	0.483251
SH3 domain-binding glutamic acid-rich-like protein OS=Mus musculus GN=Sh3bgrl PE=1 SV=1	Q9JJU8	1.227	0.160051
Podocalyxin-like protein 2 OS=Mus musculus GN=Podxl2 PE=1 SV=2	Q8CAE9	0.938	0.883372
Fanconi anemia group A protein homolog OS=Mus musculus GN=Fanca PE=2 SV=2	Q9JL70
Sodium/calcium exchanger 1 OS=Mus musculus GN=Slc8a1 PE=1 SV=2	G5E8Y0	0.711	0.0216511
ATP-dependent (S)-NAD(P)H-hydrate dehydratase OS=Mus musculus GN=Naxd PE=1 SV=1	Q9CZ42	0.987	0.998835
Cystatin (Fragment) OS=Mus musculus GN=Cst3 PE=1 SV=1	A2APX3	1.157	0.536485
Tropomyosin alpha-3 chain OS=Mus musculus GN=Tpm3 PE=1 SV=1	D3Z6I8	1.035	0.942263
Hexokinase-2 OS=Mus musculus GN=Hk2 PE=1 SV=1	O08528	1.084	0.956508
Epidermal growth factor receptor substrate 15-like 1 OS=Mus musculus GN=Eps15l1 PE=1 SV=3	Q60902	0.997	0.995964
Endoplasmic reticulum lectin 1 OS=Mus musculus GN=Erlec1 PE=1 SV=1	Q8VEH8	1.044	0.998835
Glioblastoma amplified sequence OS=Mus musculus GN=Gbas PE=1 SV=1	Q7TMG8	1.047	0.907381
RAC-alpha serine/threonine-protein kinase OS=Mus musculus GN=Akt1 PE=1 SV=2	P31750	1.051	0.962644
1-phosphatidylinositol 3-phosphate 5-kinase OS=Mus musculus GN=Pikfyve PE=1 SV=2	D3Z5N5	1.218	0.850106
Growth factor receptor-bound protein 2 OS=Mus musculus GN=Grb2 PE=1 SV=1	Q60631	0.965	0.964418
Lysophosphatidic acid phosphatase type 6 OS=Mus musculus GN=Acp6 PE=1 SV=1	Q8BP40	1.349	0.620574
Secernin-3 OS=Mus musculus GN=Scrn3 PE=1 SV=1	Q3TMH2	0.998	0.998835
26S proteasome non-ATPase regulatory subunit 9 OS=Mus musculus GN=Psmd9 PE=1 SV=1	Q9CR00	1.191	0.27531
Peptidyl-prolyl cis-trans isomerase FKBP1A OS=Mus musculus GN=Fkbp1a PE=1 SV=2	P26883	1.063	0.861782
Peroxisomal NADH pyrophosphatase NUDT12 OS=Mus musculus GN=Nudt12 PE=1 SV=1	Q9DCN1	1.23	0.711822
Neogenin OS=Mus musculus GN=Neo1 PE=1 SV=1	P97798	1.094	0.949945
Expressed sequence AW551984 OS=Mus musculus GN=AW551984 PE=1 SV=1	Q8BGF0	1.221	0.731563
Nuclear mitotic apparatus protein 1 OS=Mus musculus GN=Numa1 PE=1 SV=1	E9Q7G0	0.984	0.962587
Exocyst complex component 7 OS=Mus musculus GN=Exoc7 PE=1 SV=2	O35250	1.135	0.79316
Glyceraldehyde-3-phosphate dehydrogenase (Fragment) OS=Mus musculus GN=Gapdh PE=1 SV=1	S4R1W8	0.933	0.887404
CAAX prenyl protease 1 homolog OS=Mus musculus GN=Zmpste24 PE=1 SV=2	Q80W54	0.886	0.751624
Guanine nucleotide-binding protein G(I)/G(S)/G(O) subunit gamma-5 OS=Mus musculus GN=Gng5 PE=1 SV=2	Q80SZ7	0.786	0.170263
Cleavage and polyadenylation specificity factor subunit 7 OS=Mus musculus GN=Cpsf7 PE=1 SV=2	Q8BTV2	0.79	0.334125
Serine beta-lactamase-like protein LACTB, mitochondrial OS=Mus musculus GN=Lactb PE=1 SV=1	Q9EP89	1.058	0.986163
Alpha-1-antitrypsin 1-2 OS=Mus musculus GN=Serpina1b PE=1 SV=2	P22599	1.317	0.0825586
Oligodendrocyte-myelin glycoprotein OS=Mus musculus GN=Omg PE=1 SV=1	Q63912	0.924	0.858313
Prefoldin subunit 6 OS=Mus musculus GN=Pfdn6 PE=1 SV=1	G3UYF9	0.939	0.90853
Ufm1-specific protease 2 OS=Mus musculus GN=Ufsp2 PE=1 SV=1	A0A1B0GSM1	1.056	0.982014
TBC domain-containing protein kinase-like protein OS=Mus musculus GN=Tbck PE=1 SV=1	Q8BM85	1.173	0.771493
Ragulator complex protein LAMTOR1 OS=Mus musculus GN=Lamtor1 PE=1 SV=1	Q9CQ22	1.09	0.956508
Arf-GAP with SH3 domain, ANK repeat and PH domain-containing protein 2 OS=Mus musculus GN=Asap2 PE=1 SV=3	Q7SIG6	1.206	0.711822
Ras-related protein Rab-1B OS=Mus musculus GN=Rab1b PE=1 SV=1	Q9D1G1	0.797	0.102699
Biogenesis of lysosome-related organelles complex 1 subunit 4 OS=Mus musculus GN=Bloc1s4 PE=1 SV=1	Q8VED2	1.428	0.610286
Ubiquitin-conjugating enzyme E2 variant 2 OS=Mus musculus GN=Ube2v2 PE=1 SV=4	Q9D2M8	1.112	0.888103
Interferon-induced protein with tetratricopeptide repeats 1 OS=Mus musculus GN=Ifit1 PE=1 SV=2	Q64282	0.817	0.395804
Carbonic anhydrase 14 OS=Mus musculus GN=Ca14 PE=1 SV=1	Q9WVT6	0.952	0.931015
Protoporphyrinogen oxidase (Fragment) OS=Mus musculus GN=Ppox PE=1 SV=1	A0A0A6YX50
Arylsulfatase A OS=Mus musculus GN=Arsa PE=1 SV=2	P50428	1.048	0.949945
Carboxypeptidase E OS=Mus musculus GN=Cpe PE=1 SV=2	Q00493	0.963	0.964418
Elongin-C OS=Mus musculus GN=Eloc PE=1 SV=1	P83940	1.02	0.96987
Ig mu chain C region OS=Mus musculus GN=Ighm PE=1 SV=2	P01872	1.323	0.0115315
Alpha-1,3/1,6-mannosyltransferase ALG2 OS=Mus musculus GN=Alg2 PE=1 SV=2	Q9DBE8	1.049	0.962644
Thioredoxin-related transmembrane protein 4 OS=Mus musculus GN=Tmx4 PE=1 SV=2	Q8C0L0	1.048	0.990877
Retinol dehydrogenase 11 OS=Mus musculus GN=Rdh11 PE=1 SV=1	Q9R1R8	1.303	0.436543
ATP-dependent RNA helicase DDX1 OS=Mus musculus GN=Ddx1 PE=1 SV=1	Q91VR5	0.942	0.946499
Guanylate cyclase 1, soluble, alpha 2 OS=Mus musculus GN=Gucy1a2 PE=1 SV=1	F8VQK3	1.119	0.954379
Solute carrier family 17 (Sodium-dependent inorganic phosphate cotransporter), member 6, isoform CRA_a OS=Mus musculus GN=Slc17a6 PE=1 SV=1	A0A0R4J0A6	0.948	0.913694
Vesicle-associated membrane protein 1 (Fragment) OS=Mus musculus GN=Vamp1 PE=1 SV=1	A0A0N4SUV3	0.985	0.995649
Cysteine and histidine-rich domain-containing protein 1 OS=Mus musculus GN=Chordc1 PE=1 SV=1	Q9D1P4	1.025	0.96987
Myotubularin-related protein 6 OS=Mus musculus GN=Mtmr6 PE=1 SV=1	Q8VE11	1.078	0.956508
Coatomer subunit epsilon OS=Mus musculus GN=Cope PE=1 SV=3	O89079	1.053	0.972383
Protein dpy-30 homolog OS=Mus musculus GN=Dpy30 PE=1 SV=1	Q99LT0	1.173	0.964418
Serine/threonine-protein phosphatase 6 catalytic subunit OS=Mus musculus GN=Ppp6c PE=1 SV=1	Q9CQR6	1.11	0.84284
Transmembrane emp24 domain-containing protein 9 OS=Mus musculus GN=Tmed9 PE=1 SV=2	Q99KF1	0.762	0.174864
Integral membrane protein 2B OS=Mus musculus GN=Itm2b PE=1 SV=1	O89051	0.856	0.601226
Proliferating cell nuclear antigen OS=Mus musculus GN=Pcna PE=1 SV=2	P17918	0.896	0.725342
(E3-independent) E2 ubiquitin-conjugating enzyme UBE2O OS=Mus musculus GN=Ube2o PE=1 SV=3	Q6ZPJ3	1.057	0.888103
Endoplasmic reticulum metallopeptidase 1 OS=Mus musculus GN=Ermp1 PE=1 SV=2	Q3UVK0	1.123	0.888103
Optic atrophy 3 protein homolog OS=Mus musculus GN=Opa3 PE=1 SV=1	Q505D7	0.955	0.911321
F-BAR domain only protein 2 OS=Mus musculus GN=Fcho2 PE=1 SV=1	J3QPQ1	1.049	0.998835
SWI/SNF-related matrix-associated actin-dependent regulator of chromatin subfamily E member 1 OS=Mus musculus GN=Smarce1 PE=1 SV=1	O54941	0.91	0.833967
UDP-N-acetylhexosamine pyrophosphorylase OS=Mus musculus GN=Uap1 PE=1 SV=1	Q91YN5	1.071	0.96987
General transcription factor IIF subunit 1 OS=Mus musculus GN=Gtf2f1 PE=1 SV=2	Q3THK3	1.045	0.998835
Polyprenol reductase OS=Mus musculus GN=Srd5a3 PE=1 SV=1	F6WPW1
Kinesin light chain 4 OS=Mus musculus GN=Klc4 PE=1 SV=1	Q9DBS5	1.056	0.990877
Histidine triad nucleotide-binding protein 3 OS=Mus musculus GN=Hint3 PE=1 SV=1	Q9CPS6	0.901	0.724319
Tenascin OS=Mus musculus GN=Tnc PE=1 SV=1	Q80YX1	0.967	0.956802
MTSS1-like protein (Fragment) OS=Mus musculus GN=Mtss1l PE=1 SV=1	F7D291	1.159	0.96987
Phosphatidylethanolamine-binding protein 1 OS=Mus musculus GN=Pebp1 PE=1 SV=3	P70296	0.989	0.998835
Prefoldin 4 OS=Mus musculus GN=Pfdn4 PE=1 SV=1	Q6P0X1	0.961	0.917481
Cx9C motif-containing protein 4 OS=Mus musculus GN=Cmc4 PE=2 SV=1	Q61908	0.904	0.770804
Chromobox protein homolog 5 (Fragment) OS=Mus musculus GN=Cbx5 PE=1 SV=1	D3Z0U2	1.087	0.959092
ERO1-like protein alpha OS=Mus musculus GN=Ero1a PE=1 SV=2	Q8R180	1.005	0.993171
GPI-anchor transamidase OS=Mus musculus GN=Pigk PE=1 SV=1	Q8BL63	1.04	0.998835
Lysine--tRNA ligase OS=Mus musculus GN=Kars PE=1 SV=1	Q8R2P8	0.954	0.962158
E3 ubiquitin-protein ligase HECTD1 OS=Mus musculus GN=Hectd1 PE=1 SV=2	Q69ZR2	1.046	0.998835
Peroxiredoxin 6 OS=Mus musculus GN=Prdx6 PE=1 SV=1	Q6GT24	0.848	0.507581
Twinfilin-1 OS=Mus musculus GN=Twf1 PE=1 SV=2	Q91YR1	1.137	0.509573
SEC23-interacting protein OS=Mus musculus GN=Sec23ip PE=1 SV=2	Q6NZC7	1.03	0.990877
Calcium/calmodulin-dependent protein kinase type II subunit delta OS=Mus musculus GN=Camk2d PE=1 SV=2	E9Q1W0	0.779	0.115101
MAPK-interacting and spindle-stabilizing protein-like OS=Mus musculus GN=Mapk1ip1l PE=2 SV=3	Q8BH93	1.392	0.368488
Rho guanine nucleotide exchange factor (GEF) 11 OS=Mus musculus GN=Arhgef11 PE=1 SV=1	Q68FM7	1.187	0.883372
GTP-binding protein Di-Ras2 OS=Mus musculus GN=Diras2 PE=1 SV=1	Q5PR73	0.956	0.958669
Fatty acid-binding protein, epidermal OS=Mus musculus GN=Fabp5 PE=1 SV=3	Q05816	1.011	0.980321
Kynurenine--oxoglutarate transaminase 1 OS=Mus musculus GN=Kyat1 PE=1 SV=1	Q8BTY1	0.94	0.891337
Peptidyl-prolyl cis-trans isomerase FKBP5 OS=Mus musculus GN=Fkbp5 PE=1 SV=1	Q64378	1.143	0.826251
Kinesin-like protein KIF21A OS=Mus musculus GN=Kif21a PE=1 SV=2	E9Q0J5	0.994	0.998835
Glutamyl aminopeptidase OS=Mus musculus GN=Enpep PE=1 SV=1	P16406
Arf-GAP with Rho-GAP domain, ANK repeat and PH domain-containing protein 2 OS=Mus musculus GN=Arap2 PE=1 SV=1	E9QP44	0.997	0.974378
Heat shock 70 kDa protein 4 OS=Mus musculus GN=Hspa4 PE=1 SV=1	Q3U2G2	0.919	0.875018
Phosphatidate cytidylyltransferase 2 OS=Mus musculus GN=Cds2 PE=1 SV=1	Q99L43	1.04	0.931015
Guanylate-binding protein 9 OS=Mus musculus GN=Gbp9 PE=1 SV=1	Q8BTS3	1.028	0.993171
Toll-interacting protein OS=Mus musculus GN=Tollip PE=1 SV=1	Q9QZ06	1.153	0.483915
Complement component receptor 1-like protein OS=Mus musculus GN=Cr1l PE=1 SV=1	A0A0A6YY75	1.046	0.993171
Small nuclear ribonucleoprotein G OS=Mus musculus GN=Snrpg PE=1 SV=1	P62309	1.089	0.956508
Ankyrin-2 (Fragment) OS=Mus musculus GN=Ank2 PE=1 SV=1	S4R1M4
Cytoplasmic protein NCK1 OS=Mus musculus GN=Nck1 PE=1 SV=1	Q8BH99	1.115	0.95645
Cleft lip and palate transmembrane protein 1 homolog OS=Mus musculus GN=Clptm1 PE=1 SV=1	Q8VBZ3	0.968	0.950573
3'(2'),5'-bisphosphate nucleotidase 1 OS=Mus musculus GN=Bpnt1 PE=1 SV=1	A0A1B0GRV0	0.934	0.924462
Protein SET (Fragment) OS=Mus musculus GN=Set PE=1 SV=1	A2BE93	0.01	3.34e-15
Plasmolipin OS=Mus musculus GN=Pllp PE=1 SV=1	Q9DCU2	1.201	0.483251
Dynamin-1 OS=Mus musculus GN=Dnm1 PE=1 SV=1	A0A0J9YUN4	0.884	0.731563
Glucose-6-phosphate isomerase OS=Mus musculus GN=Gpi PE=1 SV=4	P06745	0.993	0.998835
Up-regulated during skeletal muscle growth protein 5 OS=Mus musculus GN=Usmg5 PE=1 SV=1	Q78IK2	0.824	0.333246
Spectrin beta chain, non-erythrocytic 1 OS=Mus musculus GN=Sptbn1 PE=1 SV=2	Q62261	1.019	0.967306
Epsin-2 OS=Mus musculus GN=Epn2 PE=1 SV=1	J3QNT7	0.96	0.962644
Cytohesin-1 (Fragment) OS=Mus musculus GN=Cyth1 PE=1 SV=1	A2A517	1.386	0.123618
Ubiquitin carboxyl-terminal hydrolase 19 (Fragment) OS=Mus musculus GN=Usp19 PE=1 SV=1	A0A0A6YWN9	1.212	0.771493
Nuclear migration protein nudC OS=Mus musculus GN=Nudc PE=1 SV=1	O35685	0.94	0.940082
tRNA (guanine(37)-N1)-methyltransferase OS=Mus musculus GN=Trmt5 PE=1 SV=1	Q9D0C4	1.119	0.964147
GDP-mannose 4,6 dehydratase OS=Mus musculus GN=Gmds PE=1 SV=1	Q8K0C9	1.096	0.946499
Mitogen-activated protein kinase OS=Mus musculus GN=Mapk10 PE=1 SV=1	Q80W82	1.17	0.819804
Importin-7 OS=Mus musculus GN=Ipo7 PE=1 SV=2	Q9EPL8	1.072	0.831282
Eukaryotic translation initiation factor 5A-2 OS=Mus musculus GN=Eif5a2 PE=1 SV=3	Q8BGY2	0.792	0.165947
COMM domain-containing protein 4 OS=Mus musculus GN=Commd4 PE=1 SV=1	Q9CQ02	0.843	0.521991
Secretory carrier-associated membrane protein 3 OS=Mus musculus GN=Scamp3 PE=1 SV=3	O35609	0.746	0.0383634
Ras GTPase-activating protein-binding protein 2 OS=Mus musculus GN=G3bp2 PE=1 SV=2	P97379	1.172	0.468058
Asc-type amino acid transporter 1 OS=Mus musculus GN=Slc7a10 PE=1 SV=1	P63115
Brefeldin A-inhibited guanine nucleotide-exchange protein 2 OS=Mus musculus GN=Arfgef2 PE=1 SV=1	A2A5R2	1.019	0.998835
Putative uncharacterized protein OS=Mus musculus GN=Nek7 PE=1 SV=1	Q3TN15	1.113	0.906717
Serine protease HTRA1 OS=Mus musculus GN=Htra1 PE=1 SV=2	Q9R118	1.161	0.888103
Inactive phospholipase C-like protein 1 OS=Mus musculus GN=Plcl1 PE=1 SV=3	Q3USB7	0.966	0.972383
Elongator complex protein 4 OS=Mus musculus GN=Elp4 PE=1 SV=2	Q9ER73	1.009	0.990877
Protein phosphatase PTC7 homolog OS=Mus musculus GN=Pptc7 PE=1 SV=1	Q6NVE9	1.311	0.389428
Protein arginine N-methyltransferase 1 OS=Mus musculus GN=Prmt1 PE=1 SV=1	A0A171KXD3	1.177	0.334125
WW domain binding protein 2, isoform CRA_a OS=Mus musculus GN=Wbp2 PE=1 SV=1	A2A860	0.99	0.998835
Peptide-N(4)-(N-acetyl-beta-glucosaminyl)asparagine amidase OS=Mus musculus GN=Ngly1 PE=1 SV=2	Q9JI78	1.158	0.886673
Alpha-centractin OS=Mus musculus GN=Actr1a PE=1 SV=1	P61164	0.987	0.99918
Vacuolar protein-sorting-associated protein 36 OS=Mus musculus GN=Vps36 PE=1 SV=1	Q91XD6	0.991	0.982014
Kallikrein 6, isoform CRA_a OS=Mus musculus GN=Klk6 PE=1 SV=1	Q91Y82	0.909	0.79316
Neuronal-specific septin-3 OS=Mus musculus GN=Sept3 PE=1 SV=2	Q9Z1S5	0.971	0.99098
Ketosamine-3-kinase OS=Mus musculus GN=Fn3krp PE=1 SV=2	Q8K274	0.929	0.877099
Probable tRNA pseudouridine synthase 1 OS=Mus musculus GN=Trub1 PE=1 SV=1	Q8C0D0
Hyaluronan and proteoglycan link protein 2 OS=Mus musculus GN=Hapln2 PE=1 SV=1	Q9ESM3	1.02	0.964418
Ras-related protein Rab-9B OS=Mus musculus GN=Rab9b PE=1 SV=1	Q8BHH2	1.097	0.96987
Proenkephalin-A OS=Mus musculus GN=Penk PE=1 SV=2	P22005	0.981	0.993171
Ig gamma-3 chain C region OS=Mus musculus PE=1 SV=2	P03987	1.22	0.56334
Solute carrier family 12 member 2 OS=Mus musculus GN=Slc12a2 PE=1 SV=1	E9QM38	1.025	0.993171
NEDD8-conjugating enzyme UBE2F OS=Mus musculus GN=Ube2f PE=1 SV=1	Q9CY34	1.072	0.990877
LYR motif-containing protein 4 OS=Mus musculus GN=Lyrm4 PE=1 SV=1	Q8K215	0.776	0.274116
Proteasome subunit alpha type-5 OS=Mus musculus GN=Psma5 PE=1 SV=1	Q9Z2U1	1.075	0.819804
Cytochrome P450 CYP2J9 OS=Mus musculus GN=Cyp2j9 PE=1 SV=1	Q924D1	1.129	0.919751
Dymeclin OS=Mus musculus GN=Dym PE=1 SV=1	Q8CHY3	1.054	0.998835
Tyrosine-protein phosphatase non-receptor type 23 OS=Mus musculus GN=Ptpn23 PE=1 SV=2	Q6PB44	1.043	0.990877
Protein kinase C epsilon type OS=Mus musculus GN=Prkce PE=1 SV=1	P16054	1.049	0.990877
Transmembrane protein 254 OS=Mus musculus GN=Tmem254b PE=1 SV=1	V9GX22	1.091	0.956508
Coiled-coil domain-containing protein 51 OS=Mus musculus GN=Ccdc51 PE=1 SV=1	Q3URS9	2.354	3.45968e-06
Coatomer subunit delta OS=Mus musculus GN=Arcn1 PE=1 SV=2	Q5XJY5	0.95	0.949945
Prostaglandin E synthase 2 OS=Mus musculus GN=Ptges2 PE=1 SV=3	Q8BWM0	0.991	0.979275
Tubulin-folding cofactor B OS=Mus musculus GN=Tbcb PE=1 SV=2	Q9D1E6	1.01	0.982014
F-actin-uncapping protein LRRC16A OS=Mus musculus GN=Carmil1 PE=1 SV=2	D3Z030	1.166	0.818514
MAGUK p55 subfamily member 5 OS=Mus musculus GN=Mpp5 PE=1 SV=1	Q9JLB2
Kinesin-like protein KIF2A OS=Mus musculus GN=Kif2a PE=1 SV=2	P28740	1.248	0.316532
Carbonyl reductase family member 4 OS=Mus musculus GN=Cbr4 PE=1 SV=2	Q91VT4	0.998	0.990877
Receptor expression-enhancing protein 3 OS=Mus musculus GN=Reep3 PE=1 SV=1	Q99KK1	1.041	0.999595
Elongation factor 1-delta (Fragment) OS=Mus musculus GN=Eef1d PE=1 SV=1	F6ZFU0	1.473	0.253392
Sperm-associated antigen 1 OS=Mus musculus GN=Spag1 PE=1 SV=1	Q80ZX8	1.042	0.998835
Rho guanine nucleotide exchange factor 12 OS=Mus musculus GN=Arhgef12 PE=1 SV=2	Q8R4H2	1.027	0.993171
Trafficking protein particle complex subunit 10 OS=Mus musculus GN=Trappc10 PE=1 SV=2	Q3TLI0	0.867	0.671299
Uncharacterized protein (Fragment) OS=Mus musculus GN=Gm45808 PE=4 SV=1	A0A1B0GSH8	1.078	0.942263
Ectonucleotide pyrophosphatase/phosphodiesterase family member 5 OS=Mus musculus GN=Enpp5 PE=1 SV=3	Q9EQG7	1.373	0.699522
U8 snoRNA-decapping enzyme OS=Mus musculus GN=Nudt16 PE=1 SV=1	Q6P3D0	1.022	0.998835
Dynactin subunit 5 OS=Mus musculus GN=Dctn5 PE=1 SV=1	Q9QZB9	1.035	0.993171
RIKEN cDNA 5031439G07 gene OS=Mus musculus GN=5031439G07Rik PE=1 SV=1	B1APX2	1.046	0.990877
Dehydrogenase/reductase SDR family member 4 OS=Mus musculus GN=Dhrs4 PE=1 SV=3	Q99LB2	1.027	0.979275
Carboxypeptidase M OS=Mus musculus GN=Cpm PE=1 SV=2	Q80V42	1.24	0.778252
Unconventional myosin-Va OS=Mus musculus GN=Myo5a PE=1 SV=2	Q99104	0.999	0.993171
Neuronal cell adhesion molecule OS=Mus musculus GN=Nrcam PE=1 SV=2	Q810U4	1.053	0.896258
Leucine-rich repeat-containing protein 52 OS=Mus musculus GN=Lrrc52 PE=1 SV=1	Q5M8M9	0.883	0.724832
Neurofascin OS=Mus musculus GN=Nfasc PE=1 SV=1	A0A087WPX3	1.02	0.964418
Caldesmon 1 OS=Mus musculus GN=Cald1 PE=1 SV=1	E9QA15	1.05	0.986163
C-Maf-inducing protein OS=Mus musculus GN=Cmip PE=1 SV=3	Q9D486	0.976	0.962158
Protein canopy homolog 3 OS=Mus musculus GN=Cnpy3 PE=1 SV=1	Q9DAU1	0.949	0.8982
TSC22 domain family protein 1 OS=Mus musculus GN=Tsc22d1 PE=1 SV=1	D3Z0V7	0.834	0.390017
NudC domain-containing protein 2 OS=Mus musculus GN=Nudcd2 PE=1 SV=1	E0CYQ2	0.971	0.956508
ATP-binding cassette sub-family F member 3 OS=Mus musculus GN=Abcf3 PE=1 SV=1	Q8K268	0.996	0.967583
Long-chain-fatty-acid--CoA ligase 1 OS=Mus musculus GN=Acsl1 PE=1 SV=1	D3Z041	1.088	0.871084
Slc24a2 protein OS=Mus musculus GN=Slc24a2 PE=1 SV=1	Q14BI1	0.831	0.376921
RING finger protein 214 OS=Mus musculus GN=Rnf214 PE=1 SV=1	Q8BFU3	1.017	0.994525
Calmodulin-regulated spectrin-associated protein 2 OS=Mus musculus GN=Camsap2 PE=1 SV=1	H7BX08	1.368	0.487875
Probable lysosomal cobalamin transporter (Fragment) OS=Mus musculus GN=Lmbrd1 PE=4 SV=1	A0A087WR85	1.241	0.758443
Ig kappa chain C region OS=Mus musculus PE=1 SV=1	P01837	0.836	0.330736
Serum paraoxonase/lactonase 3 OS=Mus musculus GN=Pon3 PE=1 SV=2	Q62087	1.103	0.962644
Calcium signal-modulating cyclophilin ligand OS=Mus musculus GN=Camlg PE=1 SV=2	P49070	0.842	0.529526
Cysteine and glycine-rich protein 1 OS=Mus musculus GN=Csrp1 PE=1 SV=3	P97315	0.887	0.737237
Sodium- and chloride-dependent GABA transporter 1 OS=Mus musculus GN=Slc6a1 PE=1 SV=2	P31648	0.982	0.962644
Myosin regulatory light chain 12B OS=Mus musculus GN=Myl12b PE=1 SV=2	Q3THE2	1.343	0.00613701
Heterogeneous nuclear ribonucleoprotein H OS=Mus musculus GN=Hnrnph1 PE=1 SV=1	Q8C2Q7	1.078	0.896842
Myelin-oligodendrocyte glycoprotein OS=Mus musculus GN=Mog PE=1 SV=1	Q61885	1.466	0.000200695
Ankyrin repeat domain 31 OS=Mus musculus GN=Ankrd31 PE=4 SV=1	A0A140LI88	1.156	0.841935
KxDL motif-containing protein 1 (Fragment) OS=Mus musculus GN=Kxd1 PE=1 SV=1	E9Q4P0	0.877	0.667382
KCC2a-S25 variant 1 OS=Mus musculus GN=Slc12a5 PE=1 SV=1	A0A076FR46	0.755	0.0231032
Copine-3 OS=Mus musculus GN=Cpne3 PE=1 SV=2	Q8BT60	0.854	0.477765
Argininosuccinate synthase OS=Mus musculus GN=Ass1 PE=1 SV=1	P16460	0.94	0.940541
Filamin-B OS=Mus musculus GN=Flnb PE=1 SV=3	Q80X90	0.981	0.993171
Nucleolar protein 3 OS=Mus musculus GN=Nol3 PE=1 SV=1	Q9D1X0	1.043	0.940082
Cerebellin-1 OS=Mus musculus GN=Cbln1 PE=1 SV=1	Q9R171	1.094	0.966322
GRIP1-associated protein 1 OS=Mus musculus GN=Gripap1 PE=1 SV=1	A2AEW9	0.982	0.972811
[truncated: 2,055 more rows]

## Sheet: Significant only
Description	Gene Symbol	Abundance Ratio: (D) / (A)	Abundance Ratio Adj. P-Value: (D) / (A)
NADH dehydrogenase [ubiquinone] 1 beta subcomplex subunit 6 OS=Mus musculus GN=Ndufb6 PE=1 SV=3	Q3UIU2	0.01	3.34e-15
Alpha-adducin OS=Mus musculus GN=Add1 PE=1 SV=1	E9Q1K3	0.01	3.34e-15
Bcl2-associated agonist of cell death OS=Mus musculus GN=Bad PE=1 SV=1	Q61337	100	3.34e-15
Myelin P2 protein OS=Mus musculus GN=Pmp2 PE=2 SV=2	P24526	6.481	3.34e-15
Haptoglobin OS=Mus musculus GN=Hp PE=1 SV=1	Q61646	1.918	3.34e-15
Protein SET (Fragment) OS=Mus musculus GN=Set PE=1 SV=1	A2BE93	0.01	3.34e-15
Periaxin OS=Mus musculus GN=Prx PE=1 SV=1	O55103	2.838	3.34e-15
Armadillo repeat protein deleted in velo-cardio-facial syndrome homolog OS=Mus musculus GN=Arvcf PE=1 SV=2	P98203	100	3.34e-15
Myelin protein P0 OS=Mus musculus GN=Mpz PE=1 SV=1	E9QK82	4.242	3.34e-15
Calcium permeable stress-gated cation channel 1 OS=Mus musculus GN=Tmem63c PE=1 SV=1	Q8CBX0	0.01	3.34e-15
Thioredoxin domain-containing protein 15 OS=Mus musculus GN=Txndc15 PE=1 SV=1	Q6P6J9	0.01	3.34e-15
InaD-like protein OS=Mus musculus GN=Patj PE=1 SV=2	Q63ZW7	0.01	3.34e-15
Collagen alpha-1(I) chain OS=Mus musculus GN=Col1a1 PE=1 SV=4	P11087	2.267	3.34e-15
Carboxypeptidase N subunit 2 OS=Mus musculus GN=Cpn2 PE=1 SV=2	Q9DBB9	100	3.34e-15
Citrate synthase OS=Mus musculus GN=Csl PE=1 SV=1	Q80X68	0.01	3.34e-15
Beta-globin OS=Mus musculus GN=Hbbt1 PE=1 SV=1	A8DUK4	1.793	2.48692e-10
Keratin, type I cytoskeletal 10 OS=Homo sapiens GN=KRT10 PE=1 SV=6	P13645	1.7	3.22059e-10
RNA polymerase II subunit A C-terminal domain phosphatase OS=Mus musculus GN=Ctdp1 PE=1 SV=1	Q7TSG2	0.432	1.64258e-08
Alpha-1-acid glycoprotein 1 OS=Mus musculus GN=Orm1 PE=1 SV=1	Q60590	2.176	1.7362e-08
Microtubule-associated protein OS=Mus musculus GN=Mapt PE=1 SV=1	A0A0A0MQC7	2.545	1.28458e-07
Keratin, type II cytoskeletal 2 epidermal OS=Homo sapiens GN=KRT2 PE=1 SV=2	P35908	1.573	7.8999e-07
Serum albumin OS=Mus musculus GN=Alb PE=1 SV=3	P07724	1.597	1.52373e-06
Metallothionein-1 OS=Mus musculus GN=Mt1 PE=1 SV=1	P02802	0.612	1.97699e-06
Coiled-coil domain-containing protein 51 OS=Mus musculus GN=Ccdc51 PE=1 SV=1	Q3URS9	2.354	3.45968e-06
Metallothionein-2 OS=Mus musculus GN=Mt2 PE=1 SV=2	P02798	0.621	4.36272e-06
Ubiquitin carboxyl-terminal hydrolase 15 OS=Mus musculus GN=Usp15 PE=1 SV=1	Q8R5H1	0.545	5.54897e-06
Fatty acid-binding protein, adipocyte OS=Mus musculus GN=Fabp4 PE=1 SV=3	P04117	1.983	7.26441e-06
Complement C3 OS=Mus musculus GN=C3 PE=1 SV=3	P01027	1.554	7.62477e-06
Protein diaphanous homolog 1 OS=Mus musculus GN=Diaph1 PE=1 SV=1	E9PV41	0.559	7.62477e-06
Neurofilament light polypeptide OS=Mus musculus GN=Nefl PE=1 SV=5	P08551	0.628	7.94387e-06
Transmembrane 9 superfamily member 2 OS=Mus musculus GN=Tm9sf2 PE=1 SV=1	P58021	2.454	8.48951e-06
Nucleolar and coiled-body phosphoprotein 1 OS=Mus musculus GN=Nolc1 PE=2 SV=1	E9Q5C9	2.278	9.5679e-06
Hemopexin OS=Mus musculus GN=Hpx PE=1 SV=2	Q91X72	1.542	1.14715e-05
Keratin, type I cytoskeletal 9 OS=Homo sapiens GN=KRT9 PE=1 SV=3	P35527	1.521	1.14869e-05
Caspase-8 OS=Mus musculus GN=Casp8 PE=1 SV=1	O89110	0.614	1.28235e-05
Kininogen-1 OS=Mus musculus GN=Kng1 PE=1 SV=1	O08677	1.501	1.33796e-05
Protein S100 OS=Mus musculus GN=S100a1 PE=1 SV=1	Q91V77	0.653	1.42214e-05
Alpha-2-HS-glycoprotein OS=Mus musculus GN=Ahsg PE=1 SV=1	P29699	1.472	1.53414e-05
Putative uncharacterized protein OS=Mus musculus GN=Tmsb15a PE=2 SV=1	Q9D2R9	0.663	2.9548e-05
Fatty acid-binding protein, brain OS=Mus musculus GN=Fabp7 PE=1 SV=2	P51880	0.678	4.29158e-05
Neuromodulin OS=Mus musculus GN=Gap43 PE=1 SV=1	P06837	0.65	5.52249e-05
ADP/ATP translocase 1 OS=Mus musculus GN=Slc25a4 PE=1 SV=4	P48962	0.656	0.000100661
Alpha-internexin OS=Mus musculus GN=Ina PE=1 SV=3	P46660	0.658	0.000117723
Neurofilament medium polypeptide OS=Mus musculus GN=Nefm PE=1 SV=4	P08553	0.664	0.000200695
Myelin-oligodendrocyte glycoprotein OS=Mus musculus GN=Mog PE=1 SV=1	Q61885	1.466	0.000200695
Metallothionein-3 OS=Mus musculus GN=Mt3 PE=1 SV=1	P28184	0.666	0.000226504
Protein S100-A9 OS=Mus musculus GN=S100a9 PE=1 SV=3	P31725	1.561	0.000226504
Carboxylesterase 1C OS=Mus musculus GN=Ces1c PE=1 SV=4	P23953	1.438	0.00026551
Excitatory amino acid transporter 2 OS=Mus musculus GN=Slc1a2 PE=1 SV=1	P43006	0.683	0.000911718
Activated RNA polymerase II transcriptional coactivator p15 OS=Mus musculus GN=Sub1 PE=1 SV=3	P11031	0.652	0.000945865
Vitamin D-binding protein OS=Mus musculus GN=Gc PE=1 SV=2	P21614	1.693	0.0012221
Carbonic anhydrase 1 OS=Mus musculus GN=Ca1 PE=1 SV=4	P13634	1.532	0.00147824
Kininogen 2 OS=Mus musculus GN=Kng2 PE=1 SV=1	Q6S9I0	1.515	0.00148414
Protein AMBP OS=Mus musculus GN=Ambp PE=1 SV=2	Q07456	1.933	0.00213138
Lumican OS=Bos taurus GN=LUM PE=1 SV=1	Q05443	1.732	0.00250711
Sodium/potassium-transporting ATPase subunit beta-1 OS=Mus musculus GN=Atp1b1 PE=1 SV=1	P14094	0.701	0.0029646
Keratin, type II cytoskeletal 1 OS=Homo sapiens GN=KRT1 PE=1 SV=6	P04264	1.387	0.00318676
Murinoglobulin-1 OS=Mus musculus GN=Mug1 PE=1 SV=3	P28665	1.341	0.00349242
Phospholemman OS=Mus musculus GN=Fxyd1 PE=1 SV=1	Q9Z239	0.632	0.0036039
Phosphatidate cytidylyltransferase OS=Mus musculus GN=Cds2 PE=1 SV=1	A2AMQ5	0.686	0.00386817
Apolipoprotein C-I OS=Mus musculus GN=Apoc1 PE=1 SV=1	P34928	1.549	0.00388684
Peripherin OS=Mus musculus GN=Prph PE=1 SV=2	P15331	0.721	0.00601346
Neurofilament heavy polypeptide OS=Mus musculus GN=Nefh PE=1 SV=3	P19246	0.713	0.00601346
Alpha-1-antitrypsin 1-4 OS=Mus musculus GN=Serpina1d PE=1 SV=1	Q00897	1.466	0.00608144
Myosin regulatory light chain 12B OS=Mus musculus GN=Myl12b PE=1 SV=2	Q3THE2	1.343	0.00613701
Leucine-rich HEV glycoprotein OS=Mus musculus GN=Lrg1 PE=1 SV=1	Q91XL1	1.729	0.00625811
Peroxisomal coenzyme A diphosphatase NUDT7 OS=Mus musculus GN=Nudt7 PE=1 SV=2	Q99P30	1.872	0.00634125
ATP synthase protein 8 OS=Mus musculus GN=Mtatp8 PE=1 SV=1	P03930	0.676	0.00634373
Serine/threonine-protein kinase Nek6 OS=Mus musculus GN=Nek6 PE=1 SV=1	A2ATN9	0.703	0.00636104
Serum paraoxonase/arylesterase 1 OS=Mus musculus GN=Pon1 PE=1 SV=2	P52430	1.669	0.00677805
SWI/SNF-related matrix-associated actin-dependent regulator of chromatin subfamily D member 2 OS=Mus musculus GN=Smarcd2 PE=1 SV=2	Q99JR8	0.654	0.0072427
Solute carrier family 2, facilitated glucose transporter member 1 OS=Mus musculus GN=Slc2a1 PE=1 SV=4	P17809	0.706	0.0072468
B-cell receptor-associated protein 31 OS=Mus musculus GN=Bcap31 PE=1 SV=4	Q61335	0.738	0.00734588
Telomere-associated protein RIF1 OS=Mus musculus GN=Rif1 PE=1 SV=2	Q6PR54	0.668	0.00934718
Monocarboxylate transporter 1 OS=Mus musculus GN=Slc16a1 PE=1 SV=1	P53986	0.736	0.0113255
Lactotransferrin OS=Mus musculus GN=Ltf PE=1 SV=4	P08071	1.601	0.0113841
Ig mu chain C region OS=Mus musculus GN=Ighm PE=1 SV=2	P01872	1.323	0.0115315
Alpha globin 1 OS=Mus musculus GN=haemaglobin alpha 1 PE=1 SV=1	Q91VB8	1.342	0.0118728
Cofilin-1 OS=Mus musculus GN=Cfl1 PE=1 SV=3	P18760	0.726	0.011909
Dedicator of cytokinesis protein 7 OS=Mus musculus GN=Dock7 PE=1 SV=2	A2A9M4	0.644	0.0176643
Protein NipSnap homolog 1 OS=Mus musculus GN=Nipsnap1 PE=1 SV=1	O55125	1.328	0.0177209
Peroxisomal sarcosine oxidase OS=Mus musculus GN=Pipox PE=1 SV=1	Q9D826	1.999	0.0177659
Sodium/calcium exchanger 1 OS=Mus musculus GN=Slc8a1 PE=1 SV=2	G5E8Y0	0.711	0.0216511
KCC2a-S25 variant 1 OS=Mus musculus GN=Slc12a5 PE=1 SV=1	A0A076FR46	0.755	0.0231032
Inter alpha-trypsin inhibitor, heavy chain 4 OS=Mus musculus GN=Itih4 PE=1 SV=1	E9Q5L2	1.479	0.0254239
ATP synthase subunit e, mitochondrial OS=Mus musculus GN=Atp5i PE=1 SV=2	Q06185	0.748	0.025965
Transthyretin OS=Mus musculus GN=Ttr PE=1 SV=1	P07309	1.279	0.0269521
Uncharacterized protein OS=Mus musculus GN=Gm1661 PE=1 SV=1	E9Q963	0.739	0.0270394
Reticulon OS=Mus musculus GN=Rtn4 PE=1 SV=1	Q8BH78	1.687	0.0292702
Plectin OS=Mus musculus GN=Plec PE=1 SV=3	Q9QXS1	1.288	0.0309059
Utrophin OS=Mus musculus GN=Utrn PE=1 SV=1	E9Q6R7	1.615	0.0314563
60S ribosomal protein L23 OS=Mus musculus GN=Rpl23 PE=1 SV=1	P62830	0.717	0.032623
Potassium-transporting ATPase alpha chain 2 OS=Mus musculus GN=Atp12a PE=1 SV=3	Q9Z1W8	0.721	0.0346536
Secretory carrier-associated membrane protein 3 OS=Mus musculus GN=Scamp3 PE=1 SV=3	O35609	0.746	0.0383634
Plasminogen OS=Mus musculus GN=Plg PE=1 SV=3	P20918	1.439	0.0383634
Protein kinase C OS=Mus musculus GN=Prkca PE=1 SV=1	Q4VA93	0.751	0.0415505
Sodium/potassium-transporting ATPase subunit alpha OS=Mus musculus GN=Atp1a3 PE=1 SV=1	A0A0G2JGX4	0.754	0.0437327
DNA helicase MCM9 OS=Mus musculus GN=Mcm9 PE=1 SV=2	Q2KHI9	1.404	0.0437327
MARCKS-related protein OS=Mus musculus GN=Marcksl1 PE=1 SV=2	P28667	0.697	0.0488282
